# Supplementary material for: Identification and characterization of dynamically regulated hepatitis-related genes in a concanavalin A-induced liver injury model
Source: Aging (Albany NY). 2020 Nov 18;12(22):23187–99. doi: 10.18632/aging.104089 (PMC7746381; doi:10.18632/aging.104089)
Supplement: Supplementary Figures [file aging-12-104089-s001..pdf]

## SUPPLEMENTARY FIGURES

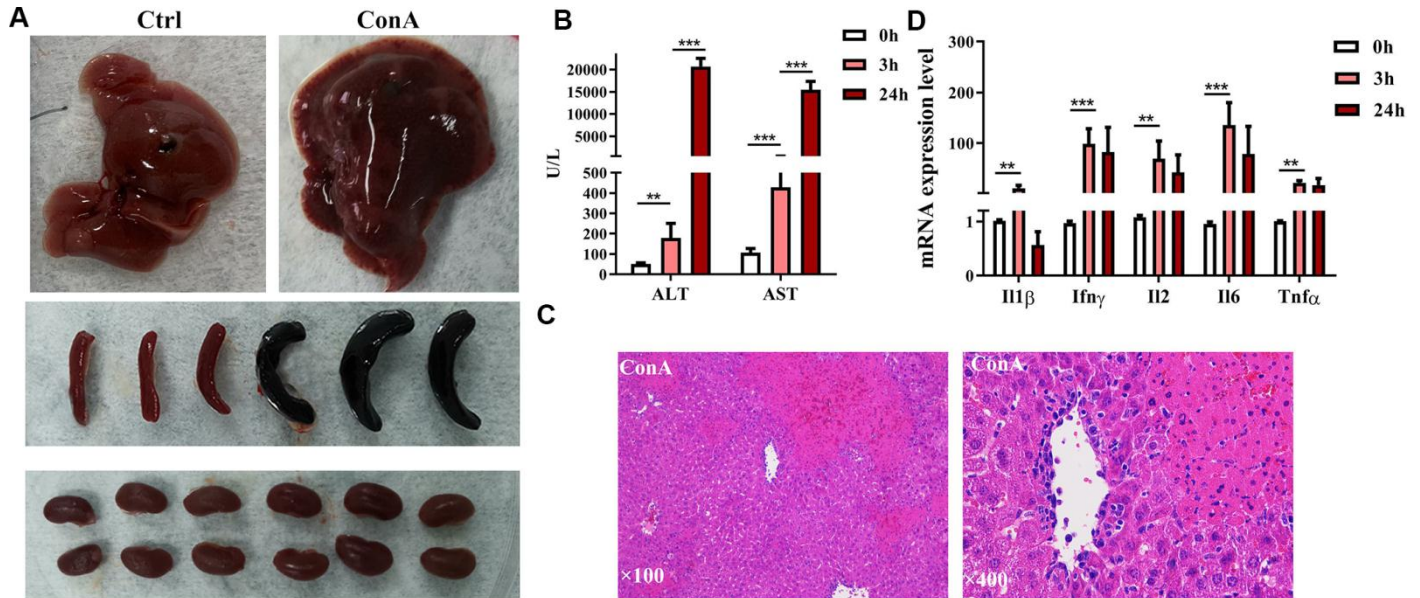

**Supplementary Figure 1. Evaluation of liver damage in mice after ConA treatment at 24h.** (A) Representative images show liver, kidney and spleen of mice injected with 10 mg/Kg ConA or PBS. (B) The serum ALT and AST levels in mice treated with 10 mg/Kg ConA or PBS. (C) Representative images show H&E stained liver sections in mice treated with 10 mg/Kg ConA or PBS. (D) qRT-PCR analysis shows relative mRNA levels of pro-inflammatory genes, *IL-1β*, *IFN-γ*, *IL-2*, *IL-6*, and *TNF-α* in liver tissues of mice treated with 10 mg/Kg ConA or PBS. \*  $p < 0.05$ ; \*\*  $p < 0.01$ ; \*\*\*  $p < 0.001$ .

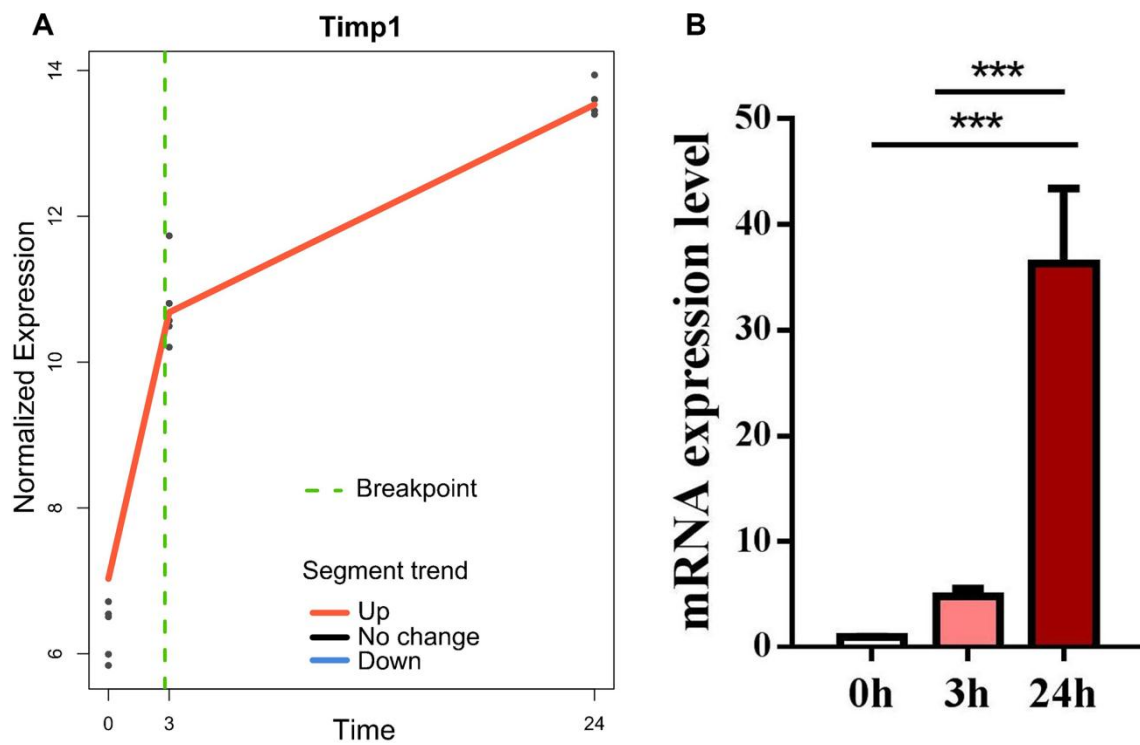

**Supplementary Figure 2. *Timp1* expression in mice after ConA treatment.** (A) Trendy analysis results show the dynamic expression of *Timp1* in ConA-treated mice (3 h and 24 h post-ConA treatment). (B) qRT-PCR analysis shows *Timp1* expression in the liver tissues of mice treated with ConA at 0h, 3 h and 24 h post-treatment respectively. \*\*\*  $p < 0.001$ .
