# Supplementary material for: Identification and characterization of dynamically regulated hepatitis-related genes in a concanavalin A-induced liver injury model
Source: Aging (Albany NY). 2020 Nov 18;12(22):23187–99. doi: 10.18632/aging.104089 (PMC7746381; doi:10.18632/aging.104089)
Supplement: Supplementary Table 1 [file aging-12-104089-s002..xlsx]

## Sheet: Sheet1
ID	AdjustedR2	BreakPoint	Segment1.Slope	Segment2.Slope	Segment1.Trend	Segment2.Trend	Segment1.Pvalue	Segment2.Pvalue	GSM1103921.Trend	GSM1103922.Trend	GSM1103923.Trend	GSM1103924.Trend	GSM1103925.Trend	GSM1103926.Trend	GSM1103927.Trend	GSM1103928.Trend	GSM1103929.Trend	GSM1103930.Trend	GSM1103936.Trend	GSM1103937.Trend	GSM1103938.Trend	GSM1103939.Trend	GSM1103940.Trend
Cd63	0.995529	0.793702	-0.21328	0.18114	0	1	0.221482	0.00675014	0	0	0	0	0	1	1	1	1	1	1	1	1	1	1
Saa3	0.994836	3.42672	2.4863	0.010951	1	0	0.00832973	0.264463	1	1	1	1	1	0	1	0	1	1	0	0	0	0	0
2810007J24Rik	0.994312	22.1987	-0.1229	-0.72259	-1	0	0.079535	0.102704	-1	-1	-1	-1	-1	-1	-1	-1	-1	-1	0	0	0	0	0
Slc10a1	0.994253	21.0961	-0.15224	0.48768	-1	1	0.0277755	0.0583705	-1	-1	-1	-1	-1	-1	-1	-1	-1	-1	1	1	1	1	1
Gm4907	0.993799	7.31135	0.62175	-0.0046306	1	0	0.015352	0.49391	1	1	1	1	1	1	1	1	1	1	0	0	0	0	0
Nrxn1	0.993779	24.1377	-0.15822	-1.2721	-1	0	0.0099059	0.100901	-1	-1	-1	-1	-1	-1	-1	-1	-1	-1	0	0	-1	-1	0
Ugt2a3	0.992229	NA	-0.118569	NA	-1	NA	2.61213e-15	NA	-1	-1	-1	-1	-1	-1	-1	-1	-1	-1	-1	-1	-1	-1	-1
Angptl6	0.992102	13.7073	-0.32636	0.14584	-1	0	0.0213711	0.279523	-1	-1	-1	-1	-1	-1	-1	-1	-1	-1	0	0	0	0	0
Inmt	0.99163	NA	-0.271824	NA	-1	NA	4.23169e-15	NA	-1	-1	-1	-1	-1	-1	-1	-1	-1	-1	-1	-1	-1	-1	-1
Dpyd	0.991268	24.2785	-0.1316	1.1076	-1	0	0.00929244	0.250221	-1	-1	-1	-1	-1	-1	-1	-1	-1	-1	-1	-1	-1	0	0
Otc	0.991222	23.7512	-0.1524	0.8716	-1	1	0.0139009	0.0771161	-1	-1	-1	-1	-1	-1	-1	-1	-1	-1	-1	1	1	1	1
Akr1c20	0.991083	23.6277	-0.11434	1.209	-1	1	0.060095	0.0388697	-1	-1	-1	-1	-1	-1	-1	-1	-1	-1	1	1	1	1	1
Rad9	0.990952	2.56522	-0.86911	0.15119	-1	1	0.0199257	0.00889697	-1	-1	-1	-1	-1	1	1	1	-1	1	1	1	1	1	1
Haus8	0.990645		-0.031481	0.10768	0	0	0.17353	0.283835	0	0	0	0	0	0	0	0	0	0	0	0	0	0	0
C8g	0.990516	21.9792	-0.12727	0.31781	-1	0	0.0434738	0.116855	-1	-1	-1	-1	-1	-1	-1	-1	-1	-1	0	0	0	0	0
Tbc1d10b	0.990299	3.17442	-0.43959	0.12264	-1	1	0.0178488	0.0107988	-1	-1	-1	-1	-1	-1	1	1	-1	-1	1	1	1	1	1
Elovl7	0.990204	NA	0.175847	NA	1	NA	1.17773e-14	NA	1	1	1	1	1	1	1	1	1	1	1	1	1	1	1
Slc16a3	0.990109	NA	0.254361	NA	1	NA	1.25352e-14	NA	1	1	1	1	1	1	1	1	1	1	1	1	1	1	1
Tmsb10	0.98991	NA	0.167677	NA	1	NA	1.42733e-14	NA	1	1	1	1	1	1	1	1	1	1	1	1	1	1	1
Phlda3	0.989892	2.68544	-1.0587	0.32859	-1	1	0.0343602	0.00914616	-1	-1	-1	-1	-1	1	1	1	1	-1	1	1	1	1	1
Pgcp	0.989732	0.646687	0.11264	-0.066952	0	-1	0.285235	0.0102619	0	0	0	0	0	-1	-1	-1	-1	-1	-1	-1	-1	-1	-1
Cyp4f14	0.989311	24.3189	-0.16349	1.6747	-1	0	0.0102957	0.235315	-1	-1	-1	-1	-1	-1	-1	-1	-1	-1	-1	-1	-1	0	0
Mamdc2	0.989273	22.6728	-0.20239	1.0247	-1	1	0.0522444	0.069582	-1	-1	-1	-1	-1	-1	-1	-1	-1	-1	1	1	1	1	1
Aldh2	0.988943	22.9804	-0.078457	0.2809	-1	0	0.0540097	0.128646	-1	-1	-1	-1	-1	-1	-1	-1	-1	-1	0	0	0	0	0
Ces1d	0.988621		-0.099445	-0.94566	-1	-1	0.094416	0.07725	-1	-1	-1	-1	-1	-1	-1	-1	-1	-1	-1	-1	-1	-1	-1
Htra4	0.98843	NA	-0.168704	NA	-1	NA	3.47686e-14	NA	-1	-1	-1	-1	-1	-1	-1	-1	-1	-1	-1	-1	-1	-1	-1
Il1r2	0.988229		1.734	0.1464	1	1	0.0270985	0.026247	1	1	1	1	1	1	1	1	1	1	1	1	1	1	1
Kctd17	0.987907	2.81576	-0.23519	0.13256	-1	1	0.0560541	0.0113735	-1	-1	-1	-1	-1	1	-1	1	-1	1	1	1	1	1	1
Adam15	0.987295		0.013059	0.086894	0	0	0.318148	0.31219	0	0	0	0	0	0	0	0	0	0	0	0	0	0	0
Cyp27a1	0.986737	22.6409	-0.15515	0.34927	-1	0	0.0599027	0.169935	-1	-1	-1	-1	-1	-1	-1	-1	-1	-1	0	0	0	0	0
Iah1	0.986615	NA	-0.0744471	NA	-1	NA	8.96819e-14	NA	-1	-1	-1	-1	-1	-1	-1	-1	-1	-1	-1	-1	-1	-1	-1
A330009N23Rik	0.986601	2.88308	-1.7858	0.2139	-1	1	0.0733354	0.0121064	-1	-1	-1	-1	-1	1	1	1	1	1	1	1	1	1	1
Ccl4	0.986512	3.35649	2.143	-0.074487	1	-1	0.0178558	0.0500004	1	1	1	1	1	-1	-1	-1	-1	1	-1	-1	-1	-1	-1
Etfa	0.986492	NA	-0.0654989	NA	-1	NA	9.51988e-14	NA	-1	-1	-1	-1	-1	-1	-1	-1	-1	-1	-1	-1	-1	-1	-1
Ndufa4l2	0.986475	3.26271	-0.36099	0.23079	-1	1	0.05466	0.0134745	-1	-1	-1	-1	-1	-1	-1	-1	1	1	1	1	1	1	1
Pld1	0.986361	16.011	-0.2153	0.56194	-1	0	0.028081	0.215262	-1	-1	-1	-1	-1	-1	-1	-1	-1	-1	0	0	0	0	0
Cenpo	0.985799	16.6461	-0.64995	1.4064	-1	0	0.0119703	0.124328	-1	-1	-1	-1	-1	-1	-1	-1	-1	-1	0	0	0	0	0
Itga6	0.985746	2.61794	-0.2322	0.11054	-1	1	0.0516695	0.0123919	-1	-1	-1	-1	-1	1	-1	1	-1	1	1	1	1	1	1
Fggy	0.985626	NA	-0.0966336	NA	-1	NA	1.42601e-13	NA	-1	-1	-1	-1	-1	-1	-1	-1	-1	-1	-1	-1	-1	-1	-1
4930455F23Rik	0.98562	2.71517	-0.2781	0.072819	-1	1	0.0364819	0.0108678	-1	-1	-1	-1	-1	1	1	-1	1	1	1	1	1	1	1
Prok2	0.985604	24.4311	0.20753	-6.1472	1	0	0.0115627	0.275468	1	1	1	1	1	1	1	1	1	1	1	1	0	1	0
Colec10	0.985528	NA	-0.191894	NA	-1	NA	1.49062e-13	NA	-1	-1	-1	-1	-1	-1	-1	-1	-1	-1	-1	-1	-1	-1	-1
Gzma	0.985375	6.64398	0.48094	0.064213	1	0	0.0274435	0.430742	1	1	1	1	1	1	1	1	1	1	0	0	0	0	0
Colec11	0.985367	19.5401	-0.34758	0.55197	-1	0	0.0472129	0.164291	-1	-1	-1	-1	-1	-1	-1	-1	-1	-1	0	0	0	0	0
Gsto1	0.985356	NA	-0.0841893	NA	-1	NA	1.61013e-13	NA	-1	-1	-1	-1	-1	-1	-1	-1	-1	-1	-1	-1	-1	-1	-1
Rcc2	0.985335	12.6269	-0.13315	0.25704	-1	0	0.0441685	0.159403	-1	-1	-1	-1	-1	-1	-1	-1	-1	-1	0	0	0	0	0
Slc39a6	0.985234	NA	0.100508	NA	1	NA	1.69898e-13	NA	1	1	1	1	1	1	1	1	1	1	1	1	1	1	1
Serpinf1	0.985042	22.844	-0.13309	0.42996	-1	0	0.0684725	0.130593	-1	-1	-1	-1	-1	-1	-1	-1	-1	-1	0	0	0	0	0
Afm	0.984957	24.3258	-0.084642	1.3923	-1	0	0.0122024	0.13707	-1	-1	-1	-1	-1	-1	-1	-1	-1	-1	0	-1	-1	0	-1
Cyp2c38	0.984864	23.7247	-0.14517	0.4278	-1	0	0.0797868	0.161279	-1	-1	-1	-1	-1	-1	-1	-1	-1	-1	0	0	0	0	0
Bax	0.984723		-0.058948	0.2818	0	0	0.133588	0.188339	0	0	0	0	0	0	0	0	0	0	0	0	0	0	0
Gchfr	0.984676	18.0406	-0.18975	0.16838	-1	0	0.0464569	0.251396	-1	-1	-1	-1	-1	-1	-1	-1	-1	-1	0	0	0	0	0
Macrod1	0.984592	NA	-0.139205	NA	-1	NA	2.24136e-13	NA	-1	-1	-1	-1	-1	-1	-1	-1	-1	-1	-1	-1	-1	-1	-1
Fkbp10	0.984485	6.95747	-0.48796	0.30697	-1	0	0.0231595	0.238116	-1	-1	-1	-1	-1	-1	-1	-1	-1	-1	0	0	0	0	0
Klf6	0.984359	8.84013	0.86544	-0.31471	1	0	0.0120867	0.200715	1	1	1	1	1	1	1	1	1	1	0	0	0	0	0
B3galt6	0.984193	18.705	-0.18549	0.79034	-1	0	0.0294735	0.151658	-1	-1	-1	-1	-1	-1	-1	-1	-1	-1	0	0	0	0	0
Gnmt	0.984055	NA	-0.133301	NA	-1	NA	2.80104e-13	NA	-1	-1	-1	-1	-1	-1	-1	-1	-1	-1	-1	-1	-1	-1	-1
Bche	0.983948	23.8815	-0.074675	-0.57536	-1	0	0.0222838	0.125117	-1	-1	-1	-1	-1	-1	-1	-1	-1	-1	0	0	0	-1	0
Shisa5	0.983819	24.3292	0.086931	-1.5084	1	0	0.0147363	0.126295	1	1	1	1	1	1	1	1	1	1	0	0	1	1	0
Zfp90	0.983484	3.57369	-0.3855	0.081478	-1	1	0.0157458	0.0192307	-1	-1	-1	-1	-1	-1	1	-1	-1	-1	1	1	1	1	1
Spag4	0.983438	24.0702	-0.15735	2.7311	-1	1	0.0169406	0.0963631	-1	-1	-1	-1	-1	-1	-1	-1	-1	-1	1	1	-1	1	1
Mtmr14	0.9832	2.68897	0.66211	-0.067484	1	-1	0.0155544	0.0172759	1	1	1	1	1	-1	1	-1	1	-1	-1	-1	-1	-1	-1
Aadac	0.983119	24.503	-0.075047	-3.2008	-1	0	0.0140468	0.251407	-1	-1	-1	-1	-1	-1	-1	-1	-1	-1	0	-1	0	-1	-1
Cml1	0.983085	23.3844	-0.15912	0.9454	-1	1	0.0679186	0.0794203	-1	-1	-1	-1	-1	-1	-1	-1	-1	-1	1	1	1	1	1
Oas1f	0.983066	1.71621	0.64675	0.13074	0	1	0.19468	0.0169172	0	0	0	0	0	1	1	1	1	1	1	1	1	1	1
Ugt2b1	0.982899	NA	-0.166705	NA	-1	NA	4.41587e-13	NA	-1	-1	-1	-1	-1	-1	-1	-1	-1	-1	-1	-1	-1	-1	-1
Gm5631	0.982803	22.4228	-0.16825	0.9507	-1	1	0.0557935	0.0667553	-1	-1	-1	-1	-1	-1	-1	-1	-1	-1	1	1	1	1	1
Ric8	0.98276	2.94385	-0.25989	0.091721	0	1	0.178184	0.01135	0	0	0	0	0	1	1	1	1	1	1	1	1	1	1
Tbcb	0.982753	3.41616	-0.12573	0.083298	-1	0	0.0471345	0.307841	-1	-1	-1	-1	-1	-1	-1	-1	-1	-1	0	0	0	0	0
Map3k14	0.982747	3.4758	0.39346	-0.0049516	1	0	0.013411	0.488221	1	1	1	1	1	1	1	1	1	1	0	0	0	0	0
Cyp2j8	0.982745	23.1071	-0.10386	0.59127	-1	1	0.0624363	0.0761462	-1	-1	-1	-1	-1	-1	-1	-1	-1	-1	1	1	1	1	1
Pqlc2	0.982742	3.85403	-0.46562	0.12384	-1	0	0.0169298	0.314216	-1	-1	-1	-1	-1	-1	-1	-1	-1	-1	0	0	0	0	0
Sell	0.982618		0.59353	0.17289	1	1	0.0472435	0.0202884	1	1	1	1	1	1	1	1	1	1	1	1	1	1	1
Mrm1	0.982591	3.0392	-0.78644	0.12547	-1	1	0.0183885	0.0143383	-1	-1	-1	-1	-1	1	1	-1	-1	1	1	1	1	1	1
Bckdha	0.982534	NA	-0.0660462	NA	-1	NA	5.06634e-13	NA	-1	-1	-1	-1	-1	-1	-1	-1	-1	-1	-1	-1	-1	-1	-1
Gstt1	0.982534	NA	-0.10602	NA	-1	NA	5.0679e-13	NA	-1	-1	-1	-1	-1	-1	-1	-1	-1	-1	-1	-1	-1	-1	-1
Ptrh1	0.982159	1.80587	-0.37967	0.17378	0	1	0.208774	0.0124093	0	0	0	0	0	1	1	1	1	1	1	1	1	1	1
Pygl	0.982154	7.5777	-0.20457	-0.053862	-1	0	0.0475003	0.390195	-1	-1	-1	-1	-1	-1	-1	-1	-1	-1	0	0	0	0	0
A130022J15Rik	0.982122	1.81109	-0.342	0.083729	0	1	0.124606	0.0116964	0	0	0	0	0	1	1	1	1	1	1	1	1	1	1
Sardh	0.982071	NA	-0.115058	NA	-1	NA	6.00727e-13	NA	-1	-1	-1	-1	-1	-1	-1	-1	-1	-1	-1	-1	-1	-1	-1
Nat8b	0.981853	22.4618	-0.20742	1.2476	-1	1	0.0560981	0.0631578	-1	-1	-1	-1	-1	-1	-1	-1	-1	-1	1	1	1	1	1
Cat	0.981839	17.5175	-0.1656	0.06052	-1	0	0.0560306	0.421551	-1	-1	-1	-1	-1	-1	-1	-1	-1	-1	0	0	0	0	0
Trim27	0.981803	4.85295	-0.19357	0.088839	-1	0	0.0255388	0.302907	-1	-1	-1	-1	-1	-1	-1	-1	-1	-1	0	0	0	0	0
Nostrin	0.981697	2.90831	0.53737	-0.078072	1	-1	0.0247195	0.0135295	1	1	1	1	1	-1	-1	-1	-1	1	-1	-1	-1	-1	-1
1500011B03Rik	0.981677	7.81659	-0.39424	0.27622	-1	0	0.0245728	0.204905	-1	-1	-1	-1	-1	-1	-1	-1	-1	-1	0	0	0	0	0
Ifi47	0.98167	3.40456	1.6279	-0.11514	1	-1	0.0154032	0.0303159	1	1	1	1	1	-1	-1	-1	1	1	-1	-1	-1	-1	-1
A130010J15Rik	0.981587	2.53859	-0.69974	0.088912	-1	1	0.023084	0.0141127	-1	-1	-1	-1	-1	1	1	1	-1	1	1	1	1	1	1
Clec4g	0.981344	14.2	-0.42458	0.051543	-1	0	0.0471296	0.46206	-1	-1	-1	-1	-1	-1	-1	-1	-1	-1	0	0	0	0	0
Mre11a	0.981171	2.87456	-0.13929	0.081882	-1	1	0.0626365	0.0164	-1	-1	-1	-1	-1	-1	-1	1	1	-1	1	1	1	1	1
Papss2	0.981144	22.5737	-0.1832	0.78386	-1	0	0.0617866	0.112933	-1	-1	-1	-1	-1	-1	-1	-1	-1	-1	0	0	0	0	0
Aldh6a1	0.981049	NA	-0.0750457	NA	-1	NA	8.61754e-13	NA	-1	-1	-1	-1	-1	-1	-1	-1	-1	-1	-1	-1	-1	-1	-1
Dynlt1c	0.981022	3.021	-0.30936	0.078613	-1	1	0.0238203	0.0196687	-1	-1	-1	-1	-1	-1	-1	-1	-1	1	1	1	1	1	1
Ddit3	0.981014		-0.052072	0.45154	0	0	0.193169	0.182474	0	0	0	0	0	0	0	0	0	0	0	0	0	0	0
Asf1b	0.980941	21.3396	-0.26499	2.6342	-1	0	0.047501	0.109473	-1	-1	-1	-1	-1	-1	-1	-1	-1	-1	0	0	0	0	0
Pawr	0.98093	11.9909	0.68618	-0.57981	1	-1	0.0119179	0.0956134	1	1	1	1	1	1	1	1	1	1	-1	-1	-1	-1	-1
Slc27a5	0.980916	NA	-0.0870172	NA	-1	NA	9.0194e-13	NA	-1	-1	-1	-1	-1	-1	-1	-1	-1	-1	-1	-1	-1	-1	-1
Rbmxl2	0.980905	3.05658	-1.2635	0.19259	-1	1	0.0192041	0.0151009	-1	-1	-1	-1	-1	-1	1	1	1	-1	1	1	1	1	1
Cyp2c50	0.980848		-0.032755	-0.54021	0	0	0.340934	0.187855	0	0	0	0	0	0	0	0	0	0	0	0	0	0	0
Sike1	0.980842	3.05242	-0.38403	0.089841	-1	1	0.0346666	0.0126528	-1	-1	-1	-1	-1	-1	1	1	1	1	1	1	1	1	1
Stat5a	0.980757	2.75319	0.5866	-0.094389	0	-1	0.115104	0.0127582	0	0	0	0	0	-1	-1	-1	-1	-1	-1	-1	-1	-1	-1
Amy1	0.980717	NA	-0.102496	NA	-1	NA	9.64785e-13	NA	-1	-1	-1	-1	-1	-1	-1	-1	-1	-1	-1	-1	-1	-1	-1
Tlr2	0.980581	2.62481	2.7493	-0.18629	1	-1	0.0158264	0.0264077	1	1	1	1	1	-1	1	-1	1	-1	-1	-1	-1	-1	-1
Lzic	0.980532	3.24655	-0.35179	0.12322	-1	1	0.0395311	0.0136635	-1	-1	-1	-1	-1	-1	-1	1	1	1	1	1	1	1	1
AI413582	0.980463	19.8074	-0.060972	0.73109	0	1	0.141281	0.0978943	0	0	0	0	0	0	0	0	0	0	1	1	1	1	1
Mafk	0.980385	12.5972	0.74778	-0.64335	1	-1	0.012719	0.0999357	1	1	1	1	1	1	1	1	1	1	-1	-1	-1	-1	-1
Mmp3	0.980303	0.329552	-1.1635	0.26973	0	1	0.18049	0.013324	0	0	0	1	0	1	1	1	1	1	1	1	1	1	1
Brp44	0.980297	NA	-0.0678886	NA	-1	NA	1.10999e-12	NA	-1	-1	-1	-1	-1	-1	-1	-1	-1	-1	-1	-1	-1	-1	-1
Pafah1b3	0.980143	4.45931	-0.12993	0.11229	-1	0	0.0641717	0.337759	-1	-1	-1	-1	-1	-1	-1	-1	-1	-1	0	0	0	0	0
Tax1bp3	0.980017	2.50738	-0.31872	0.089106	-1	1	0.0440962	0.0129723	-1	-1	-1	-1	-1	1	1	1	-1	1	1	1	1	1	1
Klra12	0.979961	NA	0.139105	NA	1	NA	1.23916e-12	NA	1	1	1	1	1	1	1	1	1	1	1	1	1	1	1
Sox4	0.979793	3.43939	-0.53272	0.16238	-1	1	0.026617	0.0161171	-1	-1	-1	-1	-1	1	-1	1	-1	-1	1	1	1	1	1
Bphl	0.979665	NA	-0.0927894	NA	-1	NA	1.36322e-12	NA	-1	-1	-1	-1	-1	-1	-1	-1	-1	-1	-1	-1	-1	-1	-1
Ly6c1	0.979642		0.04454	0.34064	0	0	0.223724	0.205399	0	0	0	0	0	0	0	0	0	0	0	0	0	0	0
Smpdl3a	0.979583	21.7758	-0.12885	0.44878	-1	0	0.0510793	0.125314	-1	-1	-1	-1	-1	-1	-1	-1	-1	-1	0	0	0	0	0
Armc10	0.979545	4.2341	-0.23975	0.10693	-1	0	0.0294707	0.308297	-1	-1	-1	-1	-1	-1	-1	-1	-1	-1	0	0	0	0	0
Orm3	0.979392	12.4824	0.5469	-0.19396	1	0	0.0323437	0.381869	1	1	1	1	1	1	1	1	1	1	0	0	0	0	0
Cbfa2t2	0.979267	2.95292	-0.57114	0.074531	-1	1	0.0237246	0.0154871	-1	-1	-1	-1	-1	-1	1	1	1	1	1	1	1	1	1
Cideb	0.979254	19.3139	-0.17128	0.35301	-1	0	0.0360976	0.118724	-1	-1	-1	-1	-1	-1	-1	-1	-1	-1	0	0	0	0	0
Lrit1	0.979202	19.5482	-0.25916	0.421	-1	0	0.0457985	0.177388	-1	-1	-1	-1	-1	-1	-1	-1	-1	-1	0	0	0	0	0
Anxa2	0.979163	2.51164	-0.30438	0.19455	0	1	0.105735	0.0140375	0	0	0	0	0	1	1	1	0	1	1	1	1	1	1
Ppdpf	0.979157	2.78762	-0.3438	-0.020929	0	-1	0.119549	0.0398521	0	0	0	0	0	-1	-1	-1	-1	-1	-1	-1	-1	-1	-1
Oxct2b	0.979133		-0.025818	0.17486	0	0	0.344454	0.365687	0	0	0	0	0	0	0	0	0	0	0	0	0	0	0
Pcbd1	0.979029	18.4302	-0.18654	0.33877	-1	0	0.03222	0.134858	-1	-1	-1	-1	-1	-1	-1	-1	-1	-1	0	0	0	0	0
Ptgis	0.978811	2.69203	-0.13087	0.13271	0	1	0.163273	0.0144456	0	0	0	0	0	1	1	1	0	1	1	1	1	1	1
Cyp2c29	0.978739		0.026258	-0.31884	0	0	0.336592	0.229886	0	0	0	0	0	0	0	0	0	0	0	0	0	0	0
Galm	0.978726	7.15806	-0.19702	-0.070527	-1	0	0.0566663	0.418144	-1	-1	-1	-1	-1	-1	-1	-1	-1	-1	0	0	0	0	0
Klhl13	0.978634	19.2846	-0.21903	0.45421	-1	0	0.0351478	0.128784	-1	-1	-1	-1	-1	-1	-1	-1	-1	-1	0	0	0	0	0
Nqo2	0.978589	NA	-0.0960086	NA	-1	NA	1.90677e-12	NA	-1	-1	-1	-1	-1	-1	-1	-1	-1	-1	-1	-1	-1	-1	-1
Hpd	0.978546	NA	-0.123255	NA	-1	NA	1.93178e-12	NA	-1	-1	-1	-1	-1	-1	-1	-1	-1	-1	-1	-1	-1	-1	-1
Rras	0.97853	13.7663	-0.064812	0.21845	-1	0	0.0957837	0.181979	-1	-1	-1	-1	-1	-1	-1	-1	-1	-1	0	0	0	0	0
Il18bp	0.978521	2.2049	-0.1516	0.1529	0	1	0.355826	0.0139876	0	0	0	0	0	1	1	1	1	1	1	1	1	1	1
1500011H22Rik	0.978474	2.98894	-0.45493	0.11557	-1	1	0.0308728	0.0143441	-1	-1	-1	-1	-1	1	-1	-1	1	1	1	1	1	1	1
Adam8	0.978454		0.94359	0.13493	1	1	0.0341542	0.0290285	1	1	1	1	1	1	1	1	1	1	1	1	1	1	1
Slc10a3	0.978442	3.41164	-0.39528	0.10507	-1	1	0.0292332	0.0144064	-1	-1	-1	-1	-1	-1	1	1	1	-1	1	1	1	1	1
Nup43	0.978406	11.0875	-0.54293	0.49289	-1	0	0.0168555	0.300674	-1	-1	-1	-1	-1	-1	-1	-1	-1	-1	0	0	0	0	0
Ccl2	0.978402	2.58377	2.6625	0.0041314	1	0	0.0252398	0.425855	1	1	1	1	1	0	0	0	0	1	0	0	0	0	0
Ccdc66	0.978354	3.09393	-0.30929	0.086458	-1	1	0.0331681	0.0144488	-1	-1	-1	-1	-1	1	-1	-1	1	1	1	1	1	1	1
Lipc	0.97833	NA	-0.0880005	NA	-1	NA	2.0623e-12	NA	-1	-1	-1	-1	-1	-1	-1	-1	-1	-1	-1	-1	-1	-1	-1
Gm5483	0.978297		2.057	0.087091	1	1	0.0204774	0.0689735	1	1	1	1	1	1	1	1	1	1	1	1	1	1	1
Ppp1r14b	0.978282	2.4736	-0.53031	0.1199	0	1	0.169016	0.0126704	0	0	0	0	0	1	1	1	1	1	1	1	1	1	1
Smad5	0.978237	2.98907	0.72671	-0.069206	1	-1	0.0234283	0.0195468	1	1	1	1	1	-1	-1	-1	-1	1	-1	-1	-1	-1	-1
Cldn14	0.978218	6.36077	1.1948	-0.35501	1	0	0.0130089	0.243759	1	1	1	1	1	1	1	1	1	1	0	0	0	0	0
Krt80	0.978143		-0.0085926	-1.3075	0	0	0.380162	0.11937	0	0	0	0	0	0	0	0	0	0	0	0	0	0	0
Thy1	0.97813	24.3265	0.12331	3.0108	1	0	0.0191028	0.138821	1	1	1	1	1	1	1	1	1	1	0	0	0	1	1
Slc6a13	0.978106	9.96772	-0.16884	-0.0051774	-1	0	0.042492	0.49187	-1	-1	-1	-1	-1	-1	-1	-1	-1	-1	0	0	0	0	0
Aldh7a1	0.97798	21.9936	-0.13266	0.35097	-1	0	0.0775897	0.180849	-1	-1	-1	-1	-1	-1	-1	-1	-1	-1	0	0	0	0	0
Abca1	0.977954	2.86319	0.57141	-0.043209	1	-1	0.0216999	0.0240866	1	1	1	1	1	1	-1	-1	-1	-1	-1	-1	-1	-1	-1
5730469M10Rik	0.977936	11.253	-0.25365	0.064931	-1	0	0.0313764	0.402303	-1	-1	-1	-1	-1	-1	-1	-1	-1	-1	0	0	0	0	0
Pfkp	0.97786	2.46748	0.42542	0.07038	0	1	0.160846	0.0229346	0	0	0	0	0	1	1	1	1	1	1	1	1	1	1
S100a8	0.977841	3.62887	1.9109	0.071649	1	0	0.0171282	0.468393	1	1	1	1	1	1	1	1	1	1	0	0	0	0	0
Lrp4	0.977783	NA	-0.0748384	NA	-1	NA	2.42569e-12	NA	-1	-1	-1	-1	-1	-1	-1	-1	-1	-1	-1	-1	-1	-1	-1
Stfa2l1	0.977687		1.7729	0.098411	1	1	0.033594	0.0468521	1	1	1	1	1	1	1	1	1	1	1	1	1	1	1
Afmid	0.97758	NA	-0.176807	NA	-1	NA	2.5734e-12	NA	-1	-1	-1	-1	-1	-1	-1	-1	-1	-1	-1	-1	-1	-1	-1
Fxyd5	0.977575		0.019809	0.33939	0	0	0.386464	0.259828	0	0	0	0	0	0	0	0	0	0	0	0	0	0	0
Ndst2	0.977359	2.76282	-0.71254	0.088102	-1	1	0.0185512	0.0185804	-1	-1	-1	-1	-1	-1	1	1	-1	1	1	1	1	1	1
Cyp2c37	0.977293	1.2363	0.33467	-0.16797	0	-1	0.297509	0.0146394	0	0	0	0	0	-1	-1	-1	-1	-1	-1	-1	-1	-1	-1
Ifng	0.97727	3.36844	2.0138	-0.10892	1	-1	0.0145379	0.0657763	1	1	1	1	1	-1	1	1	1	1	-1	-1	-1	-1	-1
Aldh3b1	0.977268	3.70412	-0.35707	0.13298	-1	0	0.0285176	0.325651	-1	-1	-1	-1	-1	-1	-1	-1	-1	-1	0	0	0	0	0
Fam119a	0.977258	2.71998	-0.42295	0.074315	-1	1	0.0307865	0.0143615	-1	-1	-1	-1	-1	1	1	1	-1	1	1	1	1	1	1
Neu3	0.977238	2.88068	-0.71406	0.16087	-1	1	0.0389616	0.0137931	-1	-1	-1	-1	-1	1	1	1	1	-1	1	1	1	1	1
Ghr	0.977137	NA	-0.099422	NA	-1	NA	2.92284e-12	NA	-1	-1	-1	-1	-1	-1	-1	-1	-1	-1	-1	-1	-1	-1	-1
Ppm1h	0.977113		0.0086985	0.085661	0	0	0.38762	0.365393	0	0	0	0	0	0	0	0	0	0	0	0	0	0	0
Tmem177	0.977027	7.3895	-0.65266	0.25298	-1	0	0.0134059	0.382066	-1	-1	-1	-1	-1	-1	-1	-1	-1	-1	0	0	0	0	0
Cc2d1b	0.977025	5.18522	-0.32383	0.1255	-1	0	0.0215372	0.302618	-1	-1	-1	-1	-1	-1	-1	-1	-1	-1	0	0	0	0	0
Srd5a1	0.977004	6.86444	-0.30684	-0.077394	-1	0	0.0456634	0.431772	-1	-1	-1	-1	-1	-1	-1	-1	-1	-1	0	0	0	0	0
Tmprss6	0.976968	19.6405	-0.12208	0.16053	-1	0	0.0579909	0.233678	-1	-1	-1	-1	-1	-1	-1	-1	-1	-1	0	0	0	0	0
Tmem101	0.976915	3.48684	-0.49312	0.09958	-1	1	0.0202729	0.0177573	-1	-1	-1	-1	-1	-1	1	-1	1	-1	1	1	1	1	1
Arl6	0.976875	3.83427	-0.14816	0.094566	-1	0	0.0532808	0.323273	-1	-1	-1	-1	-1	-1	-1	-1	-1	-1	0	0	0	0	0
Mpeg1	0.976793		0.26954	0.073891	1	1	0.0543678	0.0235355	1	1	1	1	1	1	1	1	1	1	1	1	1	1	1
Adh7	0.976755	17.5321	0.63559	-1.0201	1	0	0.0260839	0.280382	1	1	1	1	1	1	1	1	1	1	0	0	0	0	0
Prodh2	0.976714	24.1978	-0.079267	-1.1432	-1	0	0.0202266	0.173273	-1	-1	-1	-1	-1	-1	-1	-1	-1	-1	0	-1	0	0	-1
Smox	0.976693	NA	0.178208	NA	1	NA	3.31278e-12	NA	1	1	1	1	1	1	1	1	1	1	1	1	1	1	1
LOC675594	0.976629	13.1053	1.1135	-0.80346	1	0	0.02026	0.176018	1	1	1	1	1	1	1	1	1	1	0	0	0	0	0
Gm16515	0.976572	10.1316	-0.66024	0.47451	-1	0	0.015594	0.135827	-1	-1	-1	-1	-1	-1	-1	-1	-1	-1	0	0	0	0	0
Itgam	0.976506	22.0081	0.16136	-0.53254	1	0	0.061744	0.122365	1	1	1	1	1	1	1	1	1	1	0	0	0	0	0
Tada2a	0.976384	2.67093	-0.70298	0.096988	-1	1	0.0208062	0.0170823	-1	-1	-1	-1	-1	1	-1	1	-1	1	1	1	1	1	1
Cyp4f15	0.976365	NA	-0.0844849	NA	-1	NA	3.62812e-12	NA	-1	-1	-1	-1	-1	-1	-1	-1	-1	-1	-1	-1	-1	-1	-1
BC048507	0.976323	4.32528	-0.16399	0.16966	-1	0	0.0818386	0.332949	-1	-1	-1	-1	-1	-1	-1	-1	-1	-1	0	0	0	0	0
Wdr73	0.976312	7.96931	-0.34362	0.19869	-1	0	0.0192854	0.213553	-1	-1	-1	-1	-1	-1	-1	-1	-1	-1	0	0	0	0	0
Lrp12	0.976257	2.80494	-0.4684	0.092896	-1	1	0.0232151	0.0178129	-1	-1	-1	-1	-1	-1	-1	1	1	-1	1	1	1	1	1
Agmat	0.976232	NA	-0.102503	NA	-1	NA	3.76299e-12	NA	-1	-1	-1	-1	-1	-1	-1	-1	-1	-1	-1	-1	-1	-1	-1
Azgp1	0.976214	NA	-0.0526897	NA	-1	NA	3.78203e-12	NA	-1	-1	-1	-1	-1	-1	-1	-1	-1	-1	-1	-1	-1	-1	-1
Ndrg3	0.976193	2.9133	-0.6305	0.077356	-1	1	0.0246507	0.0171144	-1	-1	-1	-1	-1	-1	1	1	1	1	1	1	1	1	1
Itgb7	0.976152	5.04464	-0.28824	0.2325	-1	0	0.0559225	0.316465	-1	-1	-1	-1	-1	-1	-1	-1	-1	-1	0	0	0	0	0
Ostm1	0.976093	2.87907	-0.35614	0.080021	-1	1	0.0300562	0.0151786	-1	-1	-1	-1	-1	1	-1	1	-1	1	1	1	1	1	1
Nrip3	0.975922	NA	0.120171	NA	1	NA	4.09495e-12	NA	1	1	1	1	1	1	1	1	1	1	1	1	1	1	1
Il11	0.975874	4.11942	0.61624	0.17325	1	0	0.0385066	0.398258	1	1	1	1	1	1	1	1	1	1	0	0	0	0	0
Uba7	0.975861		0.39974	0.067614	1	1	0.0368036	0.0313057	1	1	1	1	1	1	1	1	1	1	1	1	1	1	1
Nup50	0.975788	19.4137	0.20093	-0.49746	1	-1	0.0314537	0.0868373	1	1	1	1	1	1	1	1	1	1	-1	-1	-1	-1	-1
Rnf152	0.975701	2.82298	-0.9957	0.094903	-1	1	0.0186533	0.0222357	-1	-1	-1	-1	-1	-1	1	-1	1	1	1	1	1	1	1
Chi3l4	0.975667	14.6618	0.51948	-0.3921	1	0	0.0347416	0.303764	1	1	1	1	1	1	1	1	1	1	0	0	0	0	0
Hps6	0.975538	3.42596	-0.57285	0.10916	-1	1	0.023707	0.0162785	-1	-1	-1	-1	-1	-1	1	1	1	-1	1	1	1	1	1
Slfn4	0.975526		1.9651	0.174	1	1	0.0381643	0.036338	1	1	1	1	1	1	1	1	1	1	1	1	1	1	1
Leprel4	0.975421	2.9154	-0.51867	0.1145	-1	1	0.0397023	0.014346	-1	-1	-1	-1	-1	1	1	1	1	-1	1	1	1	1	1
Lactb	0.975414	16.5303	-0.17531	0.19379	-1	0	0.0325819	0.183302	-1	-1	-1	-1	-1	-1	-1	-1	-1	-1	0	0	0	0	0
Slc39a13	0.975319	3.13618	-0.28186	0.085711	-1	1	0.0334813	0.0172422	-1	-1	-1	-1	-1	1	-1	1	-1	-1	1	1	1	1	1
Znrf1	0.975315	24.3633	0.073006	-2.5346	1	-1	0.0153011	0.0997841	1	1	1	1	1	1	1	1	1	1	-1	1	1	1	-1
Gse1	0.975086	12.1961	-0.52081	0.72889	-1	0	0.0310923	0.133193	-1	-1	-1	-1	-1	-1	-1	-1	-1	-1	0	0	0	0	0
Ogfr	0.975035	5.59651	0.36371	-0.030079	1	0	0.0187168	0.445095	1	1	1	1	1	1	1	1	1	1	0	0	0	0	0
Suox	0.975006	1.67828	-0.2244	-0.08069	0	-1	0.198534	0.0183072	0	0	0	0	0	-1	-1	-1	-1	-1	-1	-1	-1	-1	-1
Katnb1	0.974983	3.74824	-0.28948	0.091731	-1	0	0.0238774	0.346636	-1	-1	-1	-1	-1	-1	-1	-1	-1	-1	0	0	0	0	0
Fblim1	0.974938	NA	0.110011	NA	1	NA	5.31471e-12	NA	1	1	1	1	1	1	1	1	1	1	1	1	1	1	1
Coasy	0.974881		-0.16803	-0.041179	-1	-1	0.0520581	0.025965	-1	-1	-1	-1	-1	-1	-1	-1	-1	-1	-1	-1	-1	-1	-1
Gipc1	0.974783	2.82377	-0.38787	0.087783	-1	1	0.041575	0.0145578	-1	-1	-1	-1	-1	1	1	1	-1	1	1	1	1	1	1
Asb7	0.974723	2.87653	-0.49361	0.073755	0	1	0.110403	0.0149514	0	0	0	0	0	1	1	1	1	1	1	1	1	1	1
Fhod1	0.974696	12.2017	-0.74563	0.74213	-1	0	0.0152127	0.116949	-1	-1	-1	-1	-1	-1	-1	-1	-1	-1	0	0	0	0	0
Idh2	0.974599	23.891	-0.076244	0.46624	-1	0	0.0180071	0.211769	-1	-1	-1	-1	-1	-1	-1	-1	-1	-1	0	0	-1	-1	0
B9d1	0.974571	2.71679	-0.46593	0.18697	-1	1	0.0569351	0.0162238	-1	-1	-1	-1	-1	1	-1	1	-1	1	1	1	1	1	1
H2-T9	0.974561	2.79561	-0.021642	0.078091	0	1	0.364128	0.0166441	0	0	0	0	0	1	1	1	0	1	1	1	1	1	1
0610011F06Rik	0.974547	NA	-0.0634368	NA	-1	NA	5.87759e-12	NA	-1	-1	-1	-1	-1	-1	-1	-1	-1	-1	-1	-1	-1	-1	-1
Oraov1	0.974509	2.74126	-0.38528	0.082814	0	1	0.117353	0.0138459	0	0	0	0	0	1	1	1	1	1	1	1	1	1	1
Phgdh	0.9745	23.3923	0.18069	-0.6769	1	0	0.0930089	0.151926	1	1	1	1	1	1	1	1	1	1	0	0	0	0	0
Cryab	0.974467	2.89073	-0.38977	0.11374	-1	1	0.0383345	0.0160142	-1	-1	-1	-1	-1	1	-1	-1	1	1	1	1	1	1	1
Ugt3a2	0.974408	NA	-0.103977	NA	-1	NA	6.09068e-12	NA	-1	-1	-1	-1	-1	-1	-1	-1	-1	-1	-1	-1	-1	-1	-1
Glul	0.974334	2.93963	0.20002	-0.15546	0	-1	0.103054	0.0170722	0	0	0	0	0	-1	-1	0	0	-1	-1	-1	-1	-1	-1
Zfand2a	0.974294	5.47318	-0.16609	0.15756	-1	0	0.0661713	0.30597	-1	-1	-1	-1	-1	-1	-1	-1	-1	-1	0	0	0	0	0
Cyp2c54	0.974285		-0.013328	-0.24993	0	0	0.415423	0.304526	0	0	0	0	0	0	0	0	0	0	0	0	0	0	0
Acss3	0.974258	1.10058	0.23937	-0.18282	0	-1	0.322864	0.0162105	0	0	0	0	0	-1	-1	-1	-1	-1	-1	-1	-1	-1	-1
Maob	0.974246	23.6066	-0.12333	0.66324	-1	0	0.0910074	0.116133	-1	-1	-1	-1	-1	-1	-1	-1	-1	-1	0	0	0	0	0
Pkm2	0.974207	NA	0.174814	NA	1	NA	6.40857e-12	NA	1	1	1	1	1	1	1	1	1	1	1	1	1	1	1
Slc37a1	0.974201	3.14254	1.4918	-0.079102	1	-1	0.0266326	0.0397684	1	1	1	1	1	-1	-1	-1	-1	1	-1	-1	-1	-1	-1
Zdhhc18	0.974149	5.16583	-0.38759	0.15934	-1	0	0.024398	0.279035	-1	-1	-1	-1	-1	-1	-1	-1	-1	-1	0	0	0	0	0
Gprc5b	0.974117	2.11427	-0.3258	0.21078	0	1	0.323284	0.0152813	0	0	0	0	0	1	1	1	1	1	1	1	1	1	1
Esyt1	0.974062	1.4547	-0.28757	0.07804	0	1	0.165069	0.0145851	0	0	0	0	0	1	1	1	1	1	1	1	1	1	1
Cyp1a2	0.974029	NA	-0.170576	NA	-1	NA	6.7015e-12	NA	-1	-1	-1	-1	-1	-1	-1	-1	-1	-1	-1	-1	-1	-1	-1
Abcd3	0.973975	15.7909	-0.17237	0.097678	-1	0	0.0508374	0.340669	-1	-1	-1	-1	-1	-1	-1	-1	-1	-1	0	0	0	0	0
Gm9897	0.973972	3.25155	-0.51941	0.095386	-1	1	0.0332971	0.0154728	-1	-1	-1	-1	-1	-1	1	1	1	1	1	1	1	1	1
Oas1a	0.97396	12.4095	0.38986	-0.056844	1	0	0.0443876	0.453021	1	1	1	1	1	1	1	1	1	1	0	0	0	0	0
Cmtm2a	0.973906	3.28483	-0.17527	0.16365	0	1	0.126214	0.0171864	0	0	0	0	0	0	0	1	1	1	1	1	1	1	1
Cstb	0.9739	NA	0.0866955	NA	1	NA	6.92231e-12	NA	1	1	1	1	1	1	1	1	1	1	1	1	1	1	1
Anp32b	0.973899	2.9223	-0.11357	0.06782	-1	1	0.0744643	0.0192924	-1	-1	-1	-1	-1	-1	-1	1	1	-1	1	1	1	1	1
BC055324	0.973819	2.05071	-0.14065	0.14116	0	1	0.330535	0.0156254	0	0	0	0	0	1	1	1	1	1	1	1	1	1	1
Cyb5r1	0.973797	3.71001	-0.37653	0.13173	-1	0	0.028487	0.342025	-1	-1	-1	-1	-1	-1	-1	-1	-1	-1	0	0	0	0	0
Plp2	0.973796	3.94883	-0.17426	0.15396	-1	0	0.0757285	0.343369	-1	-1	-1	-1	-1	-1	-1	-1	-1	-1	0	0	0	0	0
Rab9	0.973794	2.49819	0.14354	-0.06576	0	-1	0.239151	0.0144429	0	0	0	0	0	-1	-1	-1	-1	-1	-1	-1	-1	-1	-1
Pitpnm1	0.97376	2.47232	-0.3586	0.12038	0	1	0.193283	0.0142002	0	0	0	0	0	1	1	1	1	1	1	1	1	1	1
Il2rb	0.973715	NA	0.134024	NA	1	NA	7.24698e-12	NA	1	1	1	1	1	1	1	1	1	1	1	1	1	1	1
Tap1	0.973615	2.67493	1.1969	-0.010076	1	0	0.0212557	0.233164	1	1	1	1	1	0	1	0	1	0	0	0	0	0	0
Bst1	0.97356	18.4016	0.35377	-0.39714	1	0	0.051413	0.247834	1	1	1	1	1	1	1	1	1	1	0	0	0	0	0
Slc7a1	0.973558	3.28013	0.79918	0.025614	1	0	0.0194383	0.479301	1	1	1	1	1	1	1	1	1	1	0	0	0	0	0
Prelid2	0.973539	1.99769	-0.083986	0.14811	0	1	0.418919	0.0160691	0	0	0	0	0	1	1	1	1	1	1	1	1	1	1
Nlk	0.973468	2.88095	-0.38471	0.064847	-1	1	0.0210341	0.0194918	-1	-1	-1	-1	-1	1	-1	1	-1	-1	1	1	1	1	1
Tmem39b	0.973445	3.36905	-0.45481	0.092093	-1	1	0.0227027	0.0188285	-1	-1	-1	-1	-1	1	1	-1	-1	-1	1	1	1	1	1
Tecr	0.973287		-0.26067	-0.053319	-1	-1	0.0615765	0.0250416	-1	-1	-1	-1	-1	-1	-1	-1	-1	-1	-1	-1	-1	-1	-1
1110001J03Rik	0.973257	21.7406	-0.10614	0.24752	-1	0	0.0718022	0.215487	-1	-1	-1	-1	-1	-1	-1	-1	-1	-1	0	0	0	0	0
Med22	0.973241	6.20988	-0.47533	0.15017	-1	0	0.0152324	0.259143	-1	-1	-1	-1	-1	-1	-1	-1	-1	-1	0	0	0	0	0
Tmbim6	0.973208	NA	-0.0577641	NA	-1	NA	8.20801e-12	NA	-1	-1	-1	-1	-1	-1	-1	-1	-1	-1	-1	-1	-1	-1	-1
Usp18	0.973183	10.8927	1.0203	-0.56367	1	0	0.0166685	0.186348	1	1	1	1	1	1	1	1	1	1	0	0	0	0	0
Twf2	0.973154	3.00032	-0.60652	0.18066	-1	1	0.0329366	0.0183874	-1	-1	-1	-1	-1	1	1	-1	-1	-1	1	1	1	1	1
Ptprb	0.973125	2.36969	-0.48571	-0.088669	0	-1	0.138538	0.0235078	0	0	0	0	0	-1	-1	-1	-1	-1	-1	-1	-1	-1	-1
Xaf1	0.973091		0.71547	0.023858	1	1	0.0314754	0.0759537	1	1	1	1	1	1	1	1	1	1	1	1	1	1	1
Timp1	0.973038		1.5323	0.13524	1	1	0.0398328	0.0380477	1	1	1	1	1	1	1	1	1	1	1	1	1	1	1
Tnfaip3	0.973026	2.49896	2.733	-0.1735	1	-1	0.0238953	0.0291825	1	1	1	1	1	-1	-1	-1	1	-1	-1	-1	-1	-1	-1
Pddc1	0.973024	4.08384	-0.5526	0.10716	-1	0	0.0153026	0.352455	-1	-1	-1	-1	-1	-1	-1	-1	-1	-1	0	0	0	0	0
Cyp2f2	0.972962	NA	-0.111957	NA	-1	NA	8.70947e-12	NA	-1	-1	-1	-1	-1	-1	-1	-1	-1	-1	-1	-1	-1	-1	-1
LOC633387	0.972874	NA	0.0785993	NA	1	NA	8.89558e-12	NA	1	1	1	1	1	1	1	1	1	1	1	1	1	1	1
Il12rb1	0.972713	19.365	0.22711	-0.26142	1	0	0.0681319	0.270937	1	1	1	1	1	1	1	1	1	1	0	0	0	0	0
Serpinh1	0.972657	2.76687	-0.40159	0.16396	-1	1	0.0517945	0.0194395	-1	-1	-1	-1	-1	-1	-1	1	1	-1	1	1	1	1	1
Dgkq	0.972635	2.94878	-0.58253	0.06746	-1	1	0.0200826	0.0215328	-1	-1	-1	-1	-1	1	1	1	-1	-1	1	1	1	1	1
H2-T10	0.972582		-0.038254	0.096729	0	0	0.201414	0.370775	0	0	0	0	0	0	0	0	0	0	0	0	0	0	0
Fbxl19	0.972565	2.47771	-0.78889	0.13563	0	1	0.111656	0.0146025	0	0	0	0	0	1	1	1	1	1	1	1	1	1	1
Tecpr1	0.972506	16.2371	-0.85809	1.7032	-1	0	0.0162885	0.174588	-1	-1	-1	-1	-1	-1	-1	-1	-1	-1	0	0	0	0	0
Ces1c	0.972477		-0.011248	-1.413	0	0	0.395082	0.16031	0	0	0	0	0	0	0	0	0	0	0	0	0	0	0
Cenpt	0.972452	2.64711	-0.36506	0.12801	-1	1	0.0640393	0.0152557	-1	-1	-1	-1	-1	1	1	1	1	-1	1	1	1	1	1
Mup3	0.972432	0.743466	0.23869	-0.068968	0	-1	0.179758	0.0164686	0	0	0	0	0	-1	-1	-1	-1	-1	-1	-1	-1	-1	-1
Slfn10-ps	0.972404	15.4409	0.78238	-0.93229	1	0	0.0222869	0.142625	1	1	1	1	1	1	1	1	1	1	0	0	0	0	0
F13b	0.9724	24.1219	-0.086805	0.9289	-1	0	0.0192633	0.152756	-1	-1	-1	-1	-1	-1	-1	-1	-1	-1	-1	0	0	0	-1
Slc25a10	0.972367	3.69081	-0.18697	-0.068034	-1	0	0.0502006	0.402543	-1	-1	-1	-1	-1	-1	-1	-1	-1	-1	0	0	0	0	0
Pygo2	0.972365	3.06511	-0.38554	0.079921	-1	1	0.0244279	0.0189483	-1	-1	-1	-1	-1	-1	-1	-1	1	1	1	1	1	1	1
Adi1	0.972329	14.0312	-0.23351	0.17342	-1	0	0.0275548	0.217959	-1	-1	-1	-1	-1	-1	-1	-1	-1	-1	0	0	0	0	0
OTTMUSG00000016609	0.972289	3.43412	-0.41607	0.052656	-1	1	0.0161154	0.0316156	-1	-1	-1	-1	-1	-1	1	-1	-1	-1	1	1	1	1	1
Gm71	0.972219	4.60409	-0.094573	0.087597	-1	0	0.0769059	0.360512	-1	-1	-1	-1	-1	-1	-1	-1	-1	-1	0	0	0	0	0
Dagla	0.972153	2.75401	-0.76944	0.11016	-1	1	0.0203753	0.0205898	-1	-1	-1	-1	-1	-1	1	-1	1	-1	1	1	1	1	1
Lef1	0.972001	23.7374	0.15477	-1.0328	1	-1	0.0992392	0.0952525	1	1	1	1	1	1	1	1	1	1	-1	-1	-1	-1	-1
LOC100503637	0.971989	9.60305	0.80632	-0.36071	1	0	0.0169038	0.243195	1	1	1	1	1	1	1	1	1	1	0	0	0	0	0
Cmbl	0.97195	NA	-0.0807716	NA	-1	NA	1.10646e-11	NA	-1	-1	-1	-1	-1	-1	-1	-1	-1	-1	-1	-1	-1	-1	-1
Atg14	0.971911	2.60543	0.97958	-0.09693	1	-1	0.0263206	0.0206579	1	1	1	1	1	-1	-1	-1	1	-1	-1	-1	-1	-1	-1
Pon1	0.971891	NA	-0.0998686	NA	-1	NA	1.12183e-11	NA	-1	-1	-1	-1	-1	-1	-1	-1	-1	-1	-1	-1	-1	-1	-1
Ccdc107	0.971871	NA	-0.0752745	NA	-1	NA	1.12696e-11	NA	-1	-1	-1	-1	-1	-1	-1	-1	-1	-1	-1	-1	-1	-1	-1
2610002J02Rik	0.971786	3.73184	-0.26764	0.091954	-1	0	0.0290655	0.362919	-1	-1	-1	-1	-1	-1	-1	-1	-1	-1	0	0	0	0	0
BC100530	0.971753	3.44057	1.3099	0.079197	1	0	0.0222465	0.466035	1	1	1	1	1	1	1	1	1	1	0	0	0	0	0
Trmt12	0.971745	3.14813	-0.34186	0.066477	-1	1	0.0232965	0.0192586	-1	-1	-1	-1	-1	-1	-1	-1	1	1	1	1	1	1	1
Rab40c	0.971732	2.5615	-0.68253	0.091553	-1	1	0.0299042	0.0168912	-1	-1	-1	-1	-1	-1	1	1	1	1	1	1	1	1	1
Ly6f	0.971709	24.3342	0.19873	-4.4718	1	0	0.019404	0.128092	1	1	1	1	1	1	1	1	1	1	0	0	1	1	0
Ddx26b	0.971483	2.96644	-0.63059	0.13284	-1	1	0.0288033	0.0169632	-1	-1	-1	-1	-1	-1	1	1	-1	1	1	1	1	1	1
Tst	0.971435	20.1507	-0.14763	0.27101	-1	0	0.0585351	0.23425	-1	-1	-1	-1	-1	-1	-1	-1	-1	-1	0	0	0	0	0
Agxt	0.971408	2.50695	0.098137	-0.099539	0	-1	0.186289	0.0169885	0	0	0	0	0	-1	-1	-1	0	-1	-1	-1	-1	-1	-1
Cyth3	0.971383	10.3985	0.43111	-0.047634	1	0	0.0408664	0.450899	1	1	1	1	1	1	1	1	1	1	0	0	0	0	0
Slco1a4	0.971344	3.30903	0.021941	-0.19652	0	-1	0.413932	0.0290655	0	0	0	0	0	0	0	0	0	-1	-1	-1	-1	-1	-1
1810030O07Rik	0.971321	3.39131	-0.3653	0.087001	-1	0	0.0224202	0.337562	-1	-1	-1	-1	-1	-1	-1	-1	-1	-1	0	0	0	0	0
Pah	0.971288	NA	-0.118741	NA	-1	NA	1.28798e-11	NA	-1	-1	-1	-1	-1	-1	-1	-1	-1	-1	-1	-1	-1	-1	-1
Med17	0.971265	7.88493	0.46026	-0.17726	1	0	0.0145925	0.245621	1	1	1	1	1	1	1	1	1	1	0	0	0	0	0
Fah	0.971232	NA	-0.0537446	NA	-1	NA	1.30447e-11	NA	-1	-1	-1	-1	-1	-1	-1	-1	-1	-1	-1	-1	-1	-1	-1
Naa40	0.971185	2.40482	-0.25014	0.070788	0	1	0.169335	0.0147704	0	0	0	0	0	1	1	1	1	1	1	1	1	1	1
Gimap1	0.971151	14.4246	-0.62563	1.017	-1	0	0.0219222	0.104285	-1	-1	-1	-1	-1	-1	-1	-1	-1	-1	0	0	0	0	0
Tmem136	0.971133	2.69167	-1.0115	0.20131	-1	1	0.0290655	0.0172357	-1	-1	-1	-1	-1	-1	1	1	-1	1	1	1	1	1	1
LOC674321	0.971088	1.75845	-0.1833	-0.0487	0	-1	0.25506	0.0210703	0	0	0	0	0	-1	-1	-1	-1	-1	-1	-1	-1	-1	-1
2410002I01Rik	0.971086	3.00882	-0.55034	0.098738	-1	1	0.0256724	0.017791	-1	-1	-1	-1	-1	1	1	1	-1	-1	1	1	1	1	1
Pnpla6	0.971085	15.5286	-0.54112	0.93383	-1	0	0.0162403	0.194544	-1	-1	-1	-1	-1	-1	-1	-1	-1	-1	0	0	0	0	0
Klc2	0.971068	2.89864	-0.31587	0.064426	-1	1	0.0284591	0.0173776	-1	-1	-1	-1	-1	1	1	-1	-1	1	1	1	1	1	1
Rps6ka4	0.971057	2.38042	-0.31704	0.096943	0	1	0.238559	0.0148434	0	0	0	0	0	1	1	1	1	1	1	1	1	1	1
Whsc1	0.970949	4.81299	-0.08297	0.078229	-1	0	0.0812866	0.336203	-1	-1	-1	-1	-1	-1	-1	-1	-1	-1	0	0	0	0	0
Pklr	0.970899	11.871	-0.59341	0.27824	-1	0	0.0279018	0.328703	-1	-1	-1	-1	-1	-1	-1	-1	-1	-1	0	0	0	0	0
Cast	0.970878	NA	0.0681248	NA	1	NA	1.41273e-11	NA	1	1	1	1	1	1	1	1	1	1	1	1	1	1	1
Cobra1	0.970872	2.72514	-0.394	0.070563	-1	1	0.0265109	0.0177099	-1	-1	-1	-1	-1	1	-1	1	-1	1	1	1	1	1	1
Tnfrsf9	0.970871	3.51241	0.47706	0.058554	1	0	0.029055	0.430484	1	1	1	1	1	1	1	1	1	1	0	0	0	0	0
Gm6788	0.970803	3.65036	-0.16576	0.16051	-1	0	0.0913887	0.376291	-1	-1	-1	-1	-1	-1	-1	-1	-1	-1	0	0	0	0	0
Ube2l6	0.970776	3.32549	0.30191	0.026188	0	1	0.173547	0.0416859	0	0	0	0	0	1	1	1	1	1	1	1	1	1	1
Gm6522	0.970758	10.0019	0.76027	-0.15917	1	0	0.0329166	0.421967	1	1	1	1	1	1	1	1	1	1	0	0	0	0	0
Zswim3	0.970748	3.4778	-0.95898	0.19638	-1	1	0.020682	0.0250377	-1	-1	-1	-1	-1	1	-1	-1	-1	-1	1	1	1	1	1
Faim	0.970732	2.74463	-0.40108	0.073137	-1	1	0.0250279	0.0197405	-1	-1	-1	-1	-1	1	-1	1	-1	-1	1	1	1	1	1
Pdlim2	0.97073	3.67925	-0.78234	0.17703	-1	0	0.0201601	0.346119	-1	-1	-1	-1	-1	-1	-1	-1	-1	-1	0	0	0	0	0
Adck3	0.970691	16.426	-0.70088	0.95216	-1	0	0.0262815	0.128087	-1	-1	-1	-1	-1	-1	-1	-1	-1	-1	0	0	0	0	0
Epn2	0.970655	2.57113	-0.81069	0.12847	-1	1	0.033606	0.0165028	-1	-1	-1	-1	-1	1	1	1	-1	1	1	1	1	1	1
Haus3	0.970647	3.37153	-0.40305	0.092468	-1	1	0.0318514	0.016773	-1	-1	-1	-1	-1	-1	-1	1	1	1	1	1	1	1	1
Pgrmc1	0.970616		0.012979	-0.28385	0	0	0.351798	0.161092	0	0	0	0	0	0	0	0	0	0	0	0	0	0	0
Card11	0.970475	16.6709	-0.30527	0.91618	-1	0	0.0429433	0.110621	-1	-1	-1	-1	-1	-1	-1	-1	-1	-1	0	0	0	0	0
Hibadh	0.970471	NA	-0.0799945	NA	-1	NA	1.54606e-11	NA	-1	-1	-1	-1	-1	-1	-1	-1	-1	-1	-1	-1	-1	-1	-1
Tcn2	0.970403	NA	-0.0674686	NA	-1	NA	1.5694e-11	NA	-1	-1	-1	-1	-1	-1	-1	-1	-1	-1	-1	-1	-1	-1	-1
Sprr1a	0.970349		0.017921	0.5917	0	0	0.417169	0.252633	0	0	0	0	0	0	0	0	0	0	0	0	0	0	0
Fgf21	0.970334	3.49229	-1.3541	0.25252	-1	1	0.0213898	0.0211387	-1	-1	-1	-1	-1	1	-1	1	-1	-1	1	1	1	1	1
Ces1e	0.970321	NA	-0.166611	NA	-1	NA	1.59814e-11	NA	-1	-1	-1	-1	-1	-1	-1	-1	-1	-1	-1	-1	-1	-1	-1
Rhbdf2	0.970319	2.52076	1.1378	-0.028195	1	-1	0.0269202	0.0825967	1	1	1	1	1	-1	-1	-1	1	-1	-1	-1	-1	-1	-1
Nhlrc1	0.970279	15.5442	-0.79496	1.3825	-1	0	0.016645	0.197088	-1	-1	-1	-1	-1	-1	-1	-1	-1	-1	0	0	0	0	0
Bckdhb	0.970278	10.1343	0.10772	-0.164	1	0	0.0661144	0.244695	1	1	1	1	1	1	1	1	1	1	0	0	0	0	0
Rabl5	0.970256	4.04377	-0.09267	0.083857	-1	0	0.0865448	0.370993	-1	-1	-1	-1	-1	-1	-1	-1	-1	-1	0	0	0	0	0
5033411D12Rik	0.970215		0.053777	-0.14708	0	0	0.185631	0.361757	0	0	0	0	0	0	0	0	0	0	0	0	0	0	0
Car3	0.970193	23.9161	-0.25263	1.9007	-1	0	0.0197565	0.166663	-1	-1	-1	-1	-1	-1	-1	-1	-1	-1	0	-1	-1	0	0
Hsd17b11	0.970193	NA	-0.0615581	NA	-1	NA	1.64365e-11	NA	-1	-1	-1	-1	-1	-1	-1	-1	-1	-1	-1	-1	-1	-1	-1
BC089597	0.970189	23.6066	-0.11325	0.52994	-1	0	0.0989227	0.142339	-1	-1	-1	-1	-1	-1	-1	-1	-1	-1	0	0	0	0	0
Fam86	0.970174	3.12131	-0.41252	0.097629	-1	1	0.0349334	0.0168021	-1	-1	-1	-1	-1	-1	-1	1	1	1	1	1	1	1	1
Baz2b	0.970104	2.89265	0.65118	-0.082555	1	-1	0.0279825	0.0188074	1	1	1	1	1	1	-1	-1	-1	-1	-1	-1	-1	-1	-1
Dnajc9	0.970063	2.83114	-0.47297	0.10734	-1	1	0.042914	0.0159604	-1	-1	-1	-1	-1	-1	1	1	1	1	1	1	1	1	1
Pask	0.970049	2.97271	-0.94139	0.21777	-1	1	0.0331981	0.0172376	-1	-1	-1	-1	-1	-1	1	1	1	-1	1	1	1	1	1
Tgtp1	0.970044	2.64796	2.1364	-0.019456	1	0	0.0224581	0.229441	1	1	1	1	1	0	1	0	1	0	0	0	0	0	0
Slc38a2	0.970023	2.77311	0.80527	-0.099768	1	-1	0.0908003	0.0177761	1	1	1	1	1	-1	-1	-1	-1	-1	-1	-1	-1	-1	-1
Git1	0.969986	3.73566	-0.34472	0.13855	-1	0	0.036024	0.380074	-1	-1	-1	-1	-1	-1	-1	-1	-1	-1	0	0	0	0	0
Cyp2b9	0.969973	NA	-0.114069	NA	-1	NA	1.72428e-11	NA	-1	-1	-1	-1	-1	-1	-1	-1	-1	-1	-1	-1	-1	-1	-1
Pdgfa	0.969943	3.57875	-0.58535	0.18179	-1	0	0.0281057	0.380936	-1	-1	-1	-1	-1	-1	-1	-1	-1	-1	0	0	0	0	0
Gcdh	0.969859	NA	-0.0819079	NA	-1	NA	1.76712e-11	NA	-1	-1	-1	-1	-1	-1	-1	-1	-1	-1	-1	-1	-1	-1	-1
Aifm3	0.969831	24.3208	-0.10455	2.7889	-1	0	0.0261138	0.129868	-1	-1	-1	-1	-1	-1	-1	-1	-1	-1	0	0	0	0	-1
Ttf2	0.969785	9.60754	-0.41817	0.3077	-1	0	0.0210369	0.174657	-1	-1	-1	-1	-1	-1	-1	-1	-1	-1	0	0	0	0	0
Pstpip1	0.969768		-0.03806	0.7067	0	0	0.371275	0.225087	0	0	0	0	0	0	0	0	0	0	0	0	0	0	0
Wdr8	0.969742	2.89748	-0.39391	0.066405	-1	1	0.0256271	0.0184749	-1	-1	-1	-1	-1	1	-1	-1	1	1	1	1	1	1	1
Prrg4	0.96973	NA	0.175965	NA	1	NA	1.81688e-11	NA	1	1	1	1	1	1	1	1	1	1	1	1	1	1	1
Ptges	0.969704	NA	0.0627491	NA	1	NA	1.82734e-11	NA	1	1	1	1	1	1	1	1	1	1	1	1	1	1	1
Srxn1	0.969683	3.13156	-0.3537	0.12848	-1	1	0.0434243	0.025172	-1	-1	-1	-1	-1	-1	-1	-1	-1	1	1	1	1	1	1
Svip	0.969652	17.1829	-0.34724	0.59951	-1	0	0.0286224	0.108487	-1	-1	-1	-1	-1	-1	-1	-1	-1	-1	0	0	0	0	0
Sft2d3	0.969646	3.47179	-0.39964	0.060865	-1	1	0.017905	0.0290101	-1	-1	-1	-1	-1	-1	-1	-1	1	-1	1	1	1	1	1
Brms1l	0.969628	2.88742	-0.52895	0.094293	-1	1	0.0211289	0.0266838	-1	-1	-1	-1	-1	1	-1	-1	-1	-1	1	1	1	1	1
C630004H02Rik	0.969624	2.94903	-0.85766	0.15755	-1	1	0.0377076	0.0163621	-1	-1	-1	-1	-1	1	1	1	1	-1	1	1	1	1	1
Gngt1	0.96949	1.45653	-1.322	-0.10057	0	-1	0.14305	0.030849	0	0	0	0	0	-1	-1	-1	-1	-1	-1	-1	-1	-1	-1
Tnfaip6	0.96947	2.7233	1.9088	-0.088709	1	-1	0.0201614	0.0532922	1	1	1	1	1	1	-1	-1	1	-1	-1	-1	-1	-1	-1
Spp2	0.969378	NA	-0.084326	NA	-1	NA	1.95928e-11	NA	-1	-1	-1	-1	-1	-1	-1	-1	-1	-1	-1	-1	-1	-1	-1
Fahd2a	0.969344	NA	-0.0762389	NA	-1	NA	1.97349e-11	NA	-1	-1	-1	-1	-1	-1	-1	-1	-1	-1	-1	-1	-1	-1	-1
Gstk1	0.969331	NA	-0.076303	NA	-1	NA	1.97877e-11	NA	-1	-1	-1	-1	-1	-1	-1	-1	-1	-1	-1	-1	-1	-1	-1
Apaf1	0.969291	2.70572	1.2341	-0.056849	1	-1	0.0208076	0.0507828	1	1	1	1	1	-1	1	-1	1	-1	-1	-1	-1	-1	-1
Zfp429	0.96926	2.94371	0.75584	-0.045914	1	-1	0.0202987	0.0413243	1	1	1	1	1	-1	-1	-1	1	1	-1	-1	-1	-1	-1
Pnpla5	0.96924	8.05216	-1.643	0.45589	-1	0	0.0178188	0.303757	-1	-1	-1	-1	-1	-1	-1	-1	-1	-1	0	0	0	0	0
Tnfsf9	0.969182	14.735	0.55898	-0.35382	1	0	0.0393987	0.299665	1	1	1	1	1	1	1	1	1	1	0	0	0	0	0
Nde1	0.969163	16.9971	-0.50506	1.2169	-1	0	0.0199994	0.176282	-1	-1	-1	-1	-1	-1	-1	-1	-1	-1	0	0	0	0	0
4930583H14Rik	0.969081	2.74641	1.3351	0.14778	0	1	0.152702	0.0332662	0	0	0	0	0	1	1	1	1	1	1	1	1	1	1
Grasp	0.96907	2.96028	-0.84449	0.15606	-1	1	0.0271677	0.018282	-1	-1	-1	-1	-1	1	1	1	-1	-1	1	1	1	1	1
Ptprcap	0.969041	23.9261	0.089419	1.7571	1	0	0.0196845	0.163173	1	1	1	1	1	1	1	1	1	1	0	1	0	1	1
Igfals	0.968981		-0.16841	1.2386	0	0	0.101389	0.121317	0	0	0	0	0	0	0	0	0	0	0	0	0	0	0
Nkg7	0.968979	19.3302	0.20069	-0.37525	1	0	0.0507482	0.16101	1	1	1	1	1	1	1	1	1	1	0	0	0	0	0
A730008H23Rik	0.968957	3.36776	-1.0776	0.15097	-1	1	0.0177316	0.0303447	-1	-1	-1	-1	-1	-1	1	-1	-1	-1	1	1	1	1	1
Deaf1	0.968928	2.8735	-0.55576	0.067045	0	1	0.109967	0.0184332	0	0	0	0	0	1	1	1	1	1	1	1	1	1	1
Cyp2d22	0.9688	21.3768	-0.12501	0.4698	-1	1	0.052241	0.0950758	-1	-1	-1	-1	-1	-1	-1	-1	-1	-1	1	1	1	1	1
Tlcd2	0.968772	1.95032	-0.65536	-0.1161	0	-1	0.232341	0.0246031	0	0	0	0	0	-1	-1	-1	-1	-1	-1	-1	-1	-1	-1
Hrg	0.968693	NA	-0.0671181	NA	-1	NA	2.2629e-11	NA	-1	-1	-1	-1	-1	-1	-1	-1	-1	-1	-1	-1	-1	-1	-1
Ms4a4b	0.96865	3.15694	-0.071197	0.17245	0	1	0.264298	0.022706	0	0	0	0	0	0	0	1	0	1	1	1	1	1	1
Rps6ka1	0.968636	3.19901	-0.60124	0.090626	-1	1	0.0184321	0.0302126	-1	-1	-1	-1	-1	-1	-1	-1	-1	1	1	1	1	1	1
Tap2	0.968618	15.3534	0.32789	-0.29989	1	0	0.0334764	0.237734	1	1	1	1	1	1	1	1	1	1	0	0	0	0	0
Ddx39	0.968575	NA	0.056632	NA	1	NA	2.31907e-11	NA	1	1	1	1	1	1	1	1	1	1	1	1	1	1	1
Irf1	0.968551	3.45311	1.1988	-0.11987	1	-1	0.0178578	0.0328317	1	1	1	1	1	-1	1	-1	1	1	-1	-1	-1	-1	-1
Pbx2	0.968547	3.61614	-0.59254	0.13402	-1	0	0.0211233	0.355721	-1	-1	-1	-1	-1	-1	-1	-1	-1	-1	0	0	0	0	0
Ces1g	0.968535	24.3514	-0.12622	-6.8301	-1	0	0.0206298	0.106143	-1	-1	-1	-1	-1	-1	-1	-1	-1	-1	0	0	-1	-1	-1
Trpv2	0.968525	NA	0.0879711	NA	1	NA	2.34299e-11	NA	1	1	1	1	1	1	1	1	1	1	1	1	1	1	1
Cd3g	0.968514	22.3852	0.17589	-0.83541	1	-1	0.0717545	0.0959714	1	1	1	1	1	1	1	1	1	1	-1	-1	-1	-1	-1
Tpm1	0.968512	3.42614	-0.17944	0.11292	-1	0	0.0639048	0.349436	-1	-1	-1	-1	-1	-1	-1	-1	-1	-1	0	0	0	0	0
Sema4d	0.968472	23.2462	0.18632	-0.90337	1	0	0.0951917	0.136661	1	1	1	1	1	1	1	1	1	1	0	0	0	0	0
Tapbp	0.96841		0.32576	0.029925	1	1	0.0351605	0.0473775	1	1	1	1	1	1	1	1	1	1	1	1	1	1	1
Rgn	0.968406	23.8901	-0.21124	1.715	-1	0	0.0240303	0.272583	-1	-1	-1	-1	-1	-1	-1	-1	-1	-1	-1	0	0	0	0
Mepce	0.968374	3.67954	-0.53953	0.12123	-1	0	0.0198685	0.3663	-1	-1	-1	-1	-1	-1	-1	-1	-1	-1	0	0	0	0	0
Adh1	0.968345	2.55863	-0.25153	-0.088344	0	-1	0.102938	0.0229082	0	0	0	0	0	-1	0	-1	-1	-1	-1	-1	-1	-1	-1
C330006K01Rik	0.96822	2.87719	-0.35428	0.10258	-1	1	0.0439793	0.0176081	-1	-1	-1	-1	-1	1	-1	-1	1	1	1	1	1	1	1
Pold1	0.968158	3.20632	-0.61449	0.17002	-1	1	0.031888	0.0247828	-1	-1	-1	-1	-1	-1	1	-1	-1	-1	1	1	1	1	1
2310022A10Rik	0.968123	3.18746	-0.4253	0.096727	-1	1	0.0436271	0.016411	-1	-1	-1	-1	-1	-1	1	1	1	1	1	1	1	1	1
AI987944	0.968102	3.29303	0.42807	-0.058305	1	-1	0.0198921	0.0242588	1	1	1	1	1	1	1	1	-1	-1	-1	-1	-1	-1	-1
Padi2	0.968068	3.09374	-0.26714	0.14372	-1	1	0.0689809	0.020899	-1	-1	-1	-1	-1	-1	-1	-1	1	1	1	1	1	1	1
Cxcl9	0.968061	2.6772	2.7017	-0.034839	1	0	0.0298706	0.166559	1	1	1	1	1	0	1	0	0	0	0	0	0	0	0
Mnd1	0.968037	NA	-0.0540033	NA	-1	NA	2.5897e-11	NA	-1	-1	-1	-1	-1	-1	-1	-1	-1	-1	-1	-1	-1	-1	-1
P4ha2	0.967976		-0.1682	0.1787	0	0	0.108323	0.360223	0	0	0	0	0	0	0	0	0	0	0	0	0	0	0
Orai1	0.967971	3.37918	-0.42793	0.076148	-1	1	0.0249398	0.019572	-1	-1	-1	-1	-1	1	1	1	-1	-1	1	1	1	1	1
Serpina6	0.967968	2.86312	0.15536	-0.24783	0	-1	0.230094	0.0199045	0	0	0	0	0	-1	0	-1	0	-1	-1	-1	-1	-1	-1
Ctla2a	0.9679	19.0404	0.36988	-0.68331	1	0	0.0453738	0.1932	1	1	1	1	1	1	1	1	1	1	0	0	0	0	0
2610002D18Rik	0.967876	NA	0.198523	NA	1	NA	2.67636e-11	NA	1	1	1	1	1	1	1	1	1	1	1	1	1	1	1
Ube2u	0.96781	16.2116	-0.47784	0.70382	-1	0	0.0238203	0.100842	-1	-1	-1	-1	-1	-1	-1	-1	-1	-1	0	0	0	0	0
Dph2	0.967779	3.19289	-0.27426	0.08962	-1	1	0.0400832	0.0201435	-1	-1	-1	-1	-1	-1	1	-1	1	-1	1	1	1	1	1
Ccl11	0.967752	2.36525	3.5818	-0.13513	0	-1	0.104533	0.0486642	0	0	0	0	0	-1	-1	-1	-1	-1	-1	-1	-1	-1	-1
Cdt1	0.967712	3.56814	-0.37745	0.18872	-1	0	0.0462932	0.344869	-1	-1	-1	-1	-1	-1	-1	-1	-1	-1	0	0	0	0	0
Ifi27l2b	0.967663		-0.073781	0.16341	0	0	0.210418	0.385406	0	0	0	0	0	0	0	0	0	0	0	0	0	0	0
Socs5	0.967615	4.65401	-0.4096	0.096748	-1	0	0.0175277	0.443015	-1	-1	-1	-1	-1	-1	-1	-1	-1	-1	0	0	0	0	0
Ugt1a10	0.967594		-0.079863	-1.0816	0	0	0.158194	0.100626	0	0	0	0	0	0	0	0	0	0	0	0	0	0	0
Orm1	0.967578		0.31651	0.067484	1	1	0.0682527	0.0272303	1	1	1	1	1	1	1	1	1	1	1	1	1	1	1
Ndrg2	0.967516		-0.11493	0.58254	0	0	0.10234	0.137009	0	0	0	0	0	0	0	0	0	0	0	0	0	0	0
Pemt	0.9675		-0.22198	-0.069793	-1	-1	0.0717195	0.0262945	-1	-1	-1	-1	-1	-1	-1	-1	-1	-1	-1	-1	-1	-1	-1
Abcb11	0.967468	NA	-0.119301	NA	-1	NA	2.90528e-11	NA	-1	-1	-1	-1	-1	-1	-1	-1	-1	-1	-1	-1	-1	-1	-1
Ces2a	0.967456		-0.041354	-0.61902	0	0	0.257557	0.117159	0	0	0	0	0	0	0	0	0	0	0	0	0	0	0
Echdc3	0.967388		0.017296	-0.084733	0	0	0.336394	0.388428	0	0	0	0	0	0	0	0	0	0	0	0	0	0	0
LOC547349	0.967333		0.20067	0.043421	1	1	0.068859	0.027177	1	1	1	1	1	1	1	1	1	1	1	1	1	1	1
Uqcr11	0.967332	16.198	-0.10702	0.040818	-1	0	0.0703278	0.413444	-1	-1	-1	-1	-1	-1	-1	-1	-1	-1	0	0	0	0	0
Kctd21	0.967325	2.57097	-0.68334	0.095319	-1	1	0.0252558	0.0197442	-1	-1	-1	-1	-1	1	1	-1	1	-1	1	1	1	1	1
Ugt1a6b	0.967295	NA	-0.0829258	NA	-1	NA	3.0073e-11	NA	-1	-1	-1	-1	-1	-1	-1	-1	-1	-1	-1	-1	-1	-1	-1
Tlr13	0.967295	3.19699	-0.38725	0.15016	-1	1	0.07993	0.0165895	-1	-1	-1	-1	-1	1	1	1	-1	1	1	1	1	1	1
1810033B17Rik	0.967279	NA	0.126598	NA	1	NA	3.01704e-11	NA	1	1	1	1	1	1	1	1	1	1	1	1	1	1	1
Snrpa1	0.96726	2.49488	-0.040953	0.058563	0	1	0.420292	0.017372	0	0	0	0	0	1	1	1	1	1	1	1	1	1	1
Tada3	0.967207	3.2431	-0.45183	0.08301	-1	1	0.0396619	0.0172152	-1	-1	-1	-1	-1	1	1	1	1	-1	1	1	1	1	1
6430548M08Rik	0.967179	2.80696	-0.84737	0.17256	-1	1	0.0445729	0.016645	-1	-1	-1	-1	-1	-1	1	1	1	1	1	1	1	1	1
Rarb	0.967128	2.39034	0.31034	-0.092113	0	-1	0.191372	0.0158532	0	0	0	0	0	-1	-1	-1	-1	-1	-1	-1	-1	-1	-1
Capn10	0.96712	3.00217	-0.60316	0.068417	-1	1	0.0175065	0.034977	-1	-1	-1	-1	-1	-1	-1	-1	-1	1	1	1	1	1	1
Gstz1	0.967107	NA	-0.0708815	NA	-1	NA	3.12223e-11	NA	-1	-1	-1	-1	-1	-1	-1	-1	-1	-1	-1	-1	-1	-1	-1
Arrdc1	0.967059	2.68198	-0.45844	0.10354	-1	1	0.0479965	0.0166207	-1	-1	-1	-1	-1	1	1	-1	1	1	1	1	1	1	1
Fam161b	0.966983	3.16293	-0.70325	0.15926	-1	1	0.0290894	0.0203493	-1	-1	-1	-1	-1	-1	-1	1	-1	1	1	1	1	1	1
Tmem45a	0.966962		-0.10692	0.45608	0	0	0.15311	0.220803	0	0	0	0	0	0	0	0	0	0	0	0	0	0	0
Dcun1d2	0.966954	3.61614	-0.51779	0.077767	-1	0	0.0169939	0.38211	-1	-1	-1	-1	-1	-1	-1	-1	-1	-1	0	0	0	0	0
Rnf215	0.966935	2.78074	-0.57836	0.078129	-1	1	0.0244073	0.02055	-1	-1	-1	-1	-1	-1	1	-1	1	1	1	1	1	1	1
Kynu	0.9669		0.0052762	-0.13479	0	0	0.457809	0.344062	0	0	0	0	0	0	0	0	0	0	0	0	0	0	0
S100a11	0.9669	17.6571	0.27067	-0.2454	1	0	0.0619516	0.33476	1	1	1	1	1	1	1	1	1	1	0	0	0	0	0
Mdm2	0.966862	10.1778	0.30592	-0.09983	1	0	0.0294137	0.332045	1	1	1	1	1	1	1	1	1	1	0	0	0	0	0
Mex3d	0.966859	2.86783	-0.94956	0.18611	-1	1	0.0284059	0.020484	-1	-1	-1	-1	-1	-1	1	-1	-1	1	1	1	1	1	1
Zfp101	0.966848	3.05296	-1.1399	0.1068	-1	1	0.0294164	0.0249535	-1	-1	-1	-1	-1	1	1	1	1	-1	1	1	1	1	1
Tes	0.966818		0.47081	0.13291	1	1	0.0901843	0.0260094	1	1	1	1	1	1	1	1	1	1	1	1	1	1	1
Gm10775	0.966815		0.32249	0.030627	1	1	0.0490451	0.0408215	1	1	1	1	1	1	1	1	1	1	1	1	1	1	1
Atp11a	0.966809		0.65651	0.047605	1	1	0.0422086	0.0475193	1	1	1	1	1	1	1	1	1	1	1	1	1	1	1
Clic1	0.96679		-0.13751	0.14317	0	0	0.104464	0.384073	0	0	0	0	0	0	0	0	0	0	0	0	0	0	0
4930427A07Rik	0.966786	12.6228	-0.39932	0.6897	-1	0	0.052224	0.208407	-1	-1	-1	-1	-1	-1	-1	-1	-1	-1	0	0	0	0	0
Myd88	0.966727	2.86436	1.1215	-0.088022	1	-1	0.0215678	0.0331083	1	1	1	1	1	-1	-1	1	-1	1	-1	-1	-1	-1	-1
Slc3a2	0.966723		-0.047961	0.11929	0	0	0.144322	0.319383	0	0	0	0	0	0	0	0	0	0	0	0	0	0	0
Saa1	0.966672	2.66859	2.0199	-0.0024453	1	0	0.0212203	0.459333	1	1	1	1	1	1	0	1	1	0	0	0	0	0	0
4833442J19Rik	0.966604	10.1703	-0.44369	0.39019	-1	0	0.0264121	0.18184	-1	-1	-1	-1	-1	-1	-1	-1	-1	-1	0	0	0	0	0
Dlgap4	0.966598	10.6598	0.30305	-0.13039	1	0	0.0230307	0.27583	1	1	1	1	1	1	1	1	1	1	0	0	0	0	0
Camk1d	0.96654		-0.28914	-0.066491	-1	-1	0.0554309	0.0300675	-1	-1	-1	-1	-1	-1	-1	-1	-1	-1	-1	-1	-1	-1	-1
1110034A24Rik	0.96652	2.62174	-0.63318	0.091264	-1	1	0.0355722	0.0178288	-1	-1	-1	-1	-1	1	1	1	-1	1	1	1	1	1	1
Tgm2	0.966495	3.10706	1.1268	-0.034977	1	-1	0.0231864	0.0905238	1	1	1	1	1	-1	-1	1	1	-1	-1	-1	-1	-1	-1
6330416G13Rik	0.966493	3.05024	-0.63656	0.11694	-1	1	0.0287825	0.0189135	-1	-1	-1	-1	-1	-1	-1	1	1	1	1	1	1	1	1
Fbxl14	0.966415	2.99721	-0.15951	0.065872	-1	1	0.0476953	0.0274128	-1	-1	-1	-1	-1	1	-1	-1	-1	-1	1	1	1	1	1
Serpina3n	0.966384	2.80465	1.0728	0.04981	0	1	0.140819	0.0622988	0	0	0	0	0	1	1	1	1	1	1	1	1	1	1
Ifit1	0.966357	13.7122	1.2626	-1.2681	1	0	0.0180961	0.137968	1	1	1	1	1	1	1	1	1	1	0	0	0	0	0
Aspdh	0.966311		-0.019168	-0.5961	0	0	0.316047	0.102918	0	0	0	0	0	0	0	0	0	0	0	0	0	0	0
Galnt12	0.966289	5.47318	-0.19477	0.20311	-1	0	0.0846509	0.329291	-1	-1	-1	-1	-1	-1	-1	-1	-1	-1	0	0	0	0	0
Serpina10	0.966285	3.27543	0.49997	-0.014832	1	0	0.0189449	0.147063	1	1	1	1	1	0	1	1	1	1	0	0	0	0	0
Sbno2	0.96627	3.70977	0.59366	0.0078131	1	0	0.0197871	0.49037	1	1	1	1	1	1	1	1	1	1	0	0	0	0	0
Treml2	0.966269	12.7	0.39573	-0.12901	1	0	0.0478912	0.391955	1	1	1	1	1	1	1	1	1	1	0	0	0	0	0
Tnfaip8	0.966218	3.64564	-0.092469	0.078705	-1	0	0.0853088	0.363804	-1	-1	-1	-1	-1	-1	-1	-1	-1	-1	0	0	0	0	0
Serpine1	0.9662	2.65019	3.7944	-0.050564	1	0	0.0306006	0.170067	1	1	1	1	1	0	0	0	1	0	0	0	0	0	0
Lin7b	0.966191		0.98083	0.081968	1	1	0.0438667	0.0455227	1	1	1	1	1	1	1	1	1	1	1	1	1	1	1
Kctd2	0.96616	13.1559	-0.50369	0.48603	-1	0	0.0166642	0.115432	-1	-1	-1	-1	-1	-1	-1	-1	-1	-1	0	0	0	0	0
Mthfd1l	0.966141	NA	0.175815	NA	1	NA	3.76936e-11	NA	1	1	1	1	1	1	1	1	1	1	1	1	1	1	1
Lnpep	0.966124	NA	0.0855037	NA	1	NA	3.78238e-11	NA	1	1	1	1	1	1	1	1	1	1	1	1	1	1	1
Tmem195	0.966119	NA	-0.0777824	NA	-1	NA	3.78592e-11	NA	-1	-1	-1	-1	-1	-1	-1	-1	-1	-1	-1	-1	-1	-1	-1
Palmd	0.966111	2.7307	0.59481	-0.078229	1	-1	0.0236402	0.0217088	1	1	1	1	1	-1	-1	1	-1	1	-1	-1	-1	-1	-1
Pcyox1	0.966109	3.03841	0.60948	-0.13507	1	-1	0.0279091	0.0209127	1	1	1	1	1	-1	-1	1	1	1	-1	-1	-1	-1	-1
Tagln2	0.966107	11.4909	0.31142	-0.10949	1	0	0.0364009	0.358589	1	1	1	1	1	1	1	1	1	1	0	0	0	0	0
4933431K14Rik	0.966089	2.64771	-0.87688	0.12259	-1	1	0.0251939	0.0204184	-1	-1	-1	-1	-1	1	-1	1	-1	1	1	1	1	1	1
Armc6	0.966084	3.2138	-0.45232	0.07271	-1	1	0.0206271	0.0273423	-1	-1	-1	-1	-1	1	-1	-1	-1	-1	1	1	1	1	1
3930401B19Rik	0.966052	8.66272	0.56448	-0.18632	1	0	0.0203065	0.284547	1	1	1	1	1	1	1	1	1	1	0	0	0	0	0
Duox1	0.966022		-0.0084461	-0.20789	0	0	0.429005	0.281109	0	0	0	0	0	0	0	0	0	0	0	0	0	0	0
Adam19	0.966003	13.0972	-0.20365	0.38714	-1	0	0.0570735	0.192272	-1	-1	-1	-1	-1	-1	-1	-1	-1	-1	0	0	0	0	0
Cfhr1	0.965986	NA	-0.0706405	NA	-1	NA	3.8836e-11	NA	-1	-1	-1	-1	-1	-1	-1	-1	-1	-1	-1	-1	-1	-1	-1
Gys1	0.965968	11.0181	-0.50602	0.59892	-1	0	0.0365462	0.211976	-1	-1	-1	-1	-1	-1	-1	-1	-1	-1	0	0	0	0	0
Ppcs	0.965944	8.64941	-0.5639	0.28998	-1	0	0.0163898	0.182222	-1	-1	-1	-1	-1	-1	-1	-1	-1	-1	0	0	0	0	0
Mmp7	0.965884	NA	0.237029	NA	1	NA	3.96029e-11	NA	1	1	1	1	1	1	1	1	1	1	1	1	1	1	1
Suclg2	0.965812	NA	-0.0615295	NA	-1	NA	4.0149e-11	NA	-1	-1	-1	-1	-1	-1	-1	-1	-1	-1	-1	-1	-1	-1	-1
Cyp2c44	0.965807	2.58354	0.077351	-0.16505	0	-1	0.319778	0.0192076	0	0	0	0	0	-1	0	-1	-1	-1	-1	-1	-1	-1	-1
Ugt3a1	0.965794		-0.0019257	-0.10482	0	0	0.47746	0.335553	0	0	0	0	0	0	0	0	0	0	0	0	0	0	0
Gtse1	0.965774	0.842439	-1.028	0.27157	0	1	0.180527	0.0181054	0	0	0	0	0	1	1	1	1	1	1	1	1	1	1
Fen1	0.965748	NA	0.0665834	NA	1	NA	4.06382e-11	NA	1	1	1	1	1	1	1	1	1	1	1	1	1	1	1
Unc13d	0.965748	13.9157	-0.24203	0.51696	-1	0	0.0573522	0.193646	-1	-1	-1	-1	-1	-1	-1	-1	-1	-1	0	0	0	0	0
2810417H13Rik	0.965717	NA	0.104817	NA	1	NA	4.08775e-11	NA	1	1	1	1	1	1	1	1	1	1	1	1	1	1	1
Olfr1229	0.965703		-0.0061913	0.10563	0	0	0.442991	0.382999	0	0	0	0	0	0	0	0	0	0	0	0	0	0	0
2410075B13Rik	0.965662	11.7307	-0.53479	0.53031	-1	0	0.0194076	0.146666	-1	-1	-1	-1	-1	-1	-1	-1	-1	-1	0	0	0	0	0
Cmtm4	0.965647		-0.068651	0.068143	0	0	0.100418	0.384482	0	0	0	0	0	0	0	0	0	0	0	0	0	0	0
Itga8	0.965591	NA	-0.146505	NA	-1	NA	4.18681e-11	NA	-1	-1	-1	-1	-1	-1	-1	-1	-1	-1	-1	-1	-1	-1	-1
Zfp346	0.965548	2.54794	-0.45536	0.07996	-1	1	0.0406985	0.0173786	-1	-1	-1	-1	-1	-1	1	1	1	1	1	1	1	1	1
Zfp688	0.965533	3.52724	-0.62322	0.13561	-1	1	0.0256559	0.0217443	-1	-1	-1	-1	-1	1	-1	1	-1	-1	1	1	1	1	1
Nmi	0.9655	2.67915	0.42261	0.014704	1	0	0.0254289	0.102299	1	1	1	1	1	1	0	1	0	1	0	0	0	0	0
Dyrk3	0.96546	3.17416	0.89662	0.0084418	1	0	0.0249926	0.287768	1	1	1	1	1	1	1	0	0	1	0	0	0	0	0
Tspan17	0.965453	3.55546	-0.33363	0.088692	-1	0	0.0262989	0.367118	-1	-1	-1	-1	-1	-1	-1	-1	-1	-1	0	0	0	0	0
Fasl	0.96536	2.4835	0.49089	0.045823	0	1	0.149126	0.0382474	0	0	0	0	0	1	1	1	1	1	1	1	1	1	1
E130303B06Rik	0.965356	2.67945	-0.35971	0.15777	-1	1	0.0732078	0.0192157	-1	-1	-1	-1	-1	1	-1	1	-1	1	1	1	1	1	1
Ccnd3	0.96532	4.53147	-0.19935	0.098297	-1	0	0.0418243	0.363595	-1	-1	-1	-1	-1	-1	-1	-1	-1	-1	0	0	0	0	0
Iffo1	0.965312	3.13296	-0.72948	0.10197	-1	1	0.032557	0.0198611	-1	-1	-1	-1	-1	-1	1	1	1	1	1	1	1	1	1
Ppm1b	0.965291	10.9322	-0.23248	0.082711	-1	0	0.0333117	0.337366	-1	-1	-1	-1	-1	-1	-1	-1	-1	-1	0	0	0	0	0
Fam73b	0.96526	4.3018	-0.6047	0.085965	-1	0	0.0160772	0.393185	-1	-1	-1	-1	-1	-1	-1	-1	-1	-1	0	0	0	0	0
Lsp1	0.965244		0.025596	0.61743	0	0	0.327726	0.16155	0	0	0	0	0	0	0	0	0	0	0	0	0	0	0
Cdc42ep4	0.965188	3.13152	-0.60607	0.090394	-1	1	0.0253642	0.0211345	-1	-1	-1	-1	-1	1	1	1	-1	-1	1	1	1	1	1
A830007P12Rik	0.965173	3.00352	-1.0295	0.17077	-1	1	0.0214748	0.0293893	-1	-1	-1	-1	-1	-1	-1	-1	-1	1	1	1	1	1	1
Oasl2	0.965165	12.1697	0.65364	-0.28058	1	0	0.0332219	0.33116	1	1	1	1	1	1	1	1	1	1	0	0	0	0	0
Emb	0.965155	3.8725	0.36045	0.12595	1	0	0.0524963	0.407089	1	1	1	1	1	1	1	1	1	1	0	0	0	0	0
Rbms2	0.96513	2.71637	-0.41604	0.079485	-1	1	0.0407706	0.0175268	-1	-1	-1	-1	-1	1	1	1	-1	1	1	1	1	1	1
LOC632883	0.965068	16.7697	0.11671	-0.070727	1	0	0.0608935	0.362662	1	1	1	1	1	1	1	1	1	1	0	0	0	0	0
Mrgpra2a	0.964991	4.7082	1.1021	-0.051809	1	0	0.0206699	0.490285	1	1	1	1	1	1	1	1	1	1	0	0	0	0	0
Lrdd	0.964965	2.61534	-0.74078	0.14074	0	1	0.136002	0.0166181	0	0	0	0	0	1	1	1	1	1	1	1	1	1	1
B4galt1	0.964957	2.88654	0.74176	-0.060957	1	-1	0.0222729	0.0326605	1	1	1	1	1	-1	-1	1	-1	1	-1	-1	-1	-1	-1
Arl8a	0.964931		-0.041084	0.16702	0	0	0.20406	0.301336	0	0	0	0	0	0	0	0	0	0	0	0	0	0	0
Ubd	0.96493	2.45228	2.3272	0.14622	0	1	0.136319	0.0500144	0	0	0	0	0	1	1	1	1	1	1	1	1	1	1
Itpripl2	0.964914	7.2365	-0.29741	0.23025	-1	0	0.0485134	0.296764	-1	-1	-1	-1	-1	-1	-1	-1	-1	-1	0	0	0	0	0
D14Ertd668e	0.964913		0.70567	0.07019	1	1	0.0334869	0.0537738	1	1	1	1	1	1	1	1	1	1	1	1	1	1	1
Tcirg1	0.964894	12.04	-0.15176	0.24797	-1	0	0.0564238	0.212695	-1	-1	-1	-1	-1	-1	-1	-1	-1	-1	0	0	0	0	0
Plaur	0.964881	2.73158	1.9046	0.009111	1	0	0.0256085	0.354606	1	1	1	1	1	0	0	1	0	1	0	0	0	0	0
Cdr2l	0.96488	3.57381	-0.45149	0.13435	-1	0	0.0291398	0.389255	-1	-1	-1	-1	-1	-1	-1	-1	-1	-1	0	0	0	0	0
5730559C18Rik	0.964872	4.70576	-0.37044	0.28704	-1	0	0.069711	0.369657	-1	-1	-1	-1	-1	-1	-1	-1	-1	-1	0	0	0	0	0
Rassf6	0.964868	5.38975	-0.99997	0.23272	-1	0	0.0162851	0.336628	-1	-1	-1	-1	-1	-1	-1	-1	-1	-1	0	0	0	0	0
Hrct1	0.96483	12.429	-1.1462	1.2614	-1	0	0.0207385	0.302989	-1	-1	-1	-1	-1	-1	-1	-1	-1	-1	0	0	0	0	0
Fgr	0.964827	NA	0.090026	NA	1	NA	4.83092e-11	NA	1	1	1	1	1	1	1	1	1	1	1	1	1	1	1
Coro1a	0.964752		-0.14876	0.259	0	0	0.123117	0.321173	0	0	0	0	0	0	0	0	0	0	0	0	0	0	0
Rabl2	0.964708	2.60675	-0.3326	0.068477	-1	1	0.0359095	0.0188731	-1	-1	-1	-1	-1	1	-1	1	-1	1	1	1	1	1	1
Rbmx2	0.964639	2.62131	-0.41204	0.11731	-1	1	0.0591209	0.0172759	-1	-1	-1	-1	-1	1	1	1	1	-1	1	1	1	1	1
Hsd11b1	0.964587	NA	-0.0847675	NA	-1	NA	5.04972e-11	NA	-1	-1	-1	-1	-1	-1	-1	-1	-1	-1	-1	-1	-1	-1	-1
Scnn1a	0.964573	18.7213	-0.20554	0.27404	-1	0	0.0600748	0.272885	-1	-1	-1	-1	-1	-1	-1	-1	-1	-1	0	0	0	0	0
Cep55	0.964565	2.73441	0.66538	0.06988	0	1	0.151157	0.0372036	0	0	0	0	0	1	1	1	1	1	1	1	1	1	1
Slc45a4	0.964531	2.59523	-0.48007	0.063382	-1	1	0.0320307	0.0198784	-1	-1	-1	-1	-1	1	1	1	-1	1	1	1	1	1	1
Skap1	0.964501		-0.079937	0.90161	0	0	0.185226	0.14151	0	0	0	0	0	0	0	0	0	0	0	0	0	0	0
Cyp2c67	0.964465		-0.0043039	-0.96153	0	0	0.474269	0.133204	0	0	0	0	0	0	0	0	0	0	0	0	0	0	0
BC029214	0.964453	12.3415	-0.41916	0.29441	-1	0	0.0225215	0.2174	-1	-1	-1	-1	-1	-1	-1	-1	-1	-1	0	0	0	0	0
Ms4a4c	0.964441	NA	0.148005	NA	1	NA	5.18731e-11	NA	1	1	1	1	1	1	1	1	1	1	1	1	1	1	1
Epha2	0.964434	5.08936	-0.49586	0.2043	-1	0	0.0293192	0.306967	-1	-1	-1	-1	-1	-1	-1	-1	-1	-1	0	0	0	0	0
Hgd	0.964371	NA	-0.111477	NA	-1	NA	5.25379e-11	NA	-1	-1	-1	-1	-1	-1	-1	-1	-1	-1	-1	-1	-1	-1	-1
S100a1	0.964355	NA	-0.0595236	NA	-1	NA	5.26937e-11	NA	-1	-1	-1	-1	-1	-1	-1	-1	-1	-1	-1	-1	-1	-1	-1
Suclg1	0.96434	NA	-0.0562428	NA	-1	NA	5.2836e-11	NA	-1	-1	-1	-1	-1	-1	-1	-1	-1	-1	-1	-1	-1	-1	-1
2510012J08Rik	0.964321	4.6221	-0.25762	0.097479	-1	0	0.0297648	0.351463	-1	-1	-1	-1	-1	-1	-1	-1	-1	-1	0	0	0	0	0
Gm14446	0.964321	NA	0.238232	NA	1	NA	5.30228e-11	NA	1	1	1	1	1	1	1	1	1	1	1	1	1	1	1
Hmha1	0.964315	16.7199	-0.68511	1.6576	-1	0	0.0257159	0.213295	-1	-1	-1	-1	-1	-1	-1	-1	-1	-1	0	0	0	0	0
Cd47	0.964303	19.0076	0.12004	-0.14277	1	0	0.0640304	0.278584	1	1	1	1	1	1	1	1	1	1	0	0	0	0	0
Dph5	0.964275	3.40208	0.40196	-0.018984	1	-1	0.0186773	0.0952691	1	1	1	1	1	-1	1	1	1	1	-1	-1	-1	-1	-1
Zfp324	0.964255	2.83869	-1.3558	0.23102	-1	1	0.026375	0.0218651	-1	-1	-1	-1	-1	-1	1	-1	-1	1	1	1	1	1	1
Pbld2	0.964242	22.5905	-0.19394	1.2626	-1	1	0.0661035	0.070794	-1	-1	-1	-1	-1	-1	-1	-1	-1	-1	1	1	1	1	1
Gpank1	0.964242	4.29374	-0.30964	0.10025	-1	0	0.0269088	0.344702	-1	-1	-1	-1	-1	-1	-1	-1	-1	-1	0	0	0	0	0
Lipa	0.964215	17.4838	-0.20493	0.29833	-1	0	0.0408909	0.165273	-1	-1	-1	-1	-1	-1	-1	-1	-1	-1	0	0	0	0	0
Gzmb	0.96418	7.77265	0.90879	-0.07691	1	0	0.0304605	0.460047	1	1	1	1	1	1	1	1	1	1	0	0	0	0	0
Zmat3	0.964134	2.83509	-0.38901	0.099085	-1	1	0.0417615	0.01865	-1	-1	-1	-1	-1	1	-1	1	-1	1	1	1	1	1	1
Slc35c1	0.964116	3.38603	-0.38889	0.088453	-1	1	0.0289364	0.021171	-1	-1	-1	-1	-1	-1	-1	-1	1	1	1	1	1	1	1
Orai3	0.964115	3.09917	-0.58239	0.085877	-1	1	0.0255286	0.0215415	-1	-1	-1	-1	-1	1	1	-1	-1	1	1	1	1	1	1
Stk24	0.964107		-0.048232	0.34429	0	0	0.167422	0.145145	0	0	0	0	0	0	0	0	0	0	0	0	0	0	0
Pus3	0.96409	4.9945	-0.4621	0.16629	-1	0	0.0268161	0.30419	-1	-1	-1	-1	-1	-1	-1	-1	-1	-1	0	0	0	0	0
Prodh	0.964062	NA	-0.132688	NA	-1	NA	5.55764e-11	NA	-1	-1	-1	-1	-1	-1	-1	-1	-1	-1	-1	-1	-1	-1	-1
Dip2a	0.964052	3.56032	-0.48927	0.095461	-1	0	0.0207062	0.375115	-1	-1	-1	-1	-1	-1	-1	-1	-1	-1	0	0	0	0	0
Hebp1	0.964046	NA	-0.0719634	NA	-1	NA	5.57346e-11	NA	-1	-1	-1	-1	-1	-1	-1	-1	-1	-1	-1	-1	-1	-1	-1
Nras	0.964014	16.1789	0.14302	-0.064215	1	0	0.0659321	0.398043	1	1	1	1	1	1	1	1	1	1	0	0	0	0	0
Eid2b	0.964011	2.93819	-0.93716	0.12662	-1	1	0.033668	0.0196966	-1	-1	-1	-1	-1	1	1	1	-1	1	1	1	1	1	1
Dhdh	0.964003	18.7585	-0.15627	0.1757	-1	0	0.065885	0.328206	-1	-1	-1	-1	-1	-1	-1	-1	-1	-1	0	0	0	0	0
Inhba	0.963932	3.31531	-0.89001	0.14611	0	1	0.149094	0.0184588	0	0	0	0	0	1	1	1	1	1	1	1	1	1	1
Ift74	0.963929	2.72261	-0.3256	0.075251	-1	1	0.0506945	0.017549	-1	-1	-1	-1	-1	1	1	1	1	-1	1	1	1	1	1
Atp6v0e2	0.963905	3.18616	-0.32468	0.14084	-1	1	0.0555487	0.0218127	-1	-1	-1	-1	-1	-1	1	-1	-1	1	1	1	1	1	1
Haao	0.9639	NA	-0.0982948	NA	-1	NA	5.72337e-11	NA	-1	-1	-1	-1	-1	-1	-1	-1	-1	-1	-1	-1	-1	-1	-1
5830454E08Rik	0.963897	3.38859	-0.52947	0.049654	-1	1	0.0226206	0.0314785	-1	-1	-1	-1	-1	-1	1	1	1	-1	1	1	1	1	1
Ostf1	0.963895	NA	0.0530146	NA	1	NA	5.72829e-11	NA	1	1	1	1	1	1	1	1	1	1	1	1	1	1	1
Fzd8	0.963882	2.7723	-1.2209	0.082572	-1	1	0.0892827	0.0319129	-1	-1	-1	-1	-1	1	1	1	1	1	1	1	1	1	1
Polr2h	0.963876		-0.042426	0.084589	0	0	0.199318	0.384176	0	0	0	0	0	0	0	0	0	0	0	0	0	0	0
Ccl12	0.963875	2.63217	1.9851	0.018386	1	0	0.0329516	0.245003	1	1	1	1	1	1	0	0	0	0	0	0	0	0	0
Ass1	0.963866	NA	-0.113898	NA	-1	NA	5.75814e-11	NA	-1	-1	-1	-1	-1	-1	-1	-1	-1	-1	-1	-1	-1	-1	-1
Slc25a23	0.963851	2.83308	-0.4165	-0.067971	0	-1	0.213873	0.0300534	0	0	0	0	0	-1	-1	-1	-1	-1	-1	-1	-1	-1	-1
Uroc1	0.963827	NA	-0.0996921	NA	-1	NA	5.79852e-11	NA	-1	-1	-1	-1	-1	-1	-1	-1	-1	-1	-1	-1	-1	-1	-1
2510009E07Rik	0.963784	2.7403	-0.81616	0.10237	-1	1	0.0317003	0.0201092	-1	-1	-1	-1	-1	1	1	1	1	-1	1	1	1	1	1
Serpina3i	0.96375	3.27756	1.3246	0.04061	1	0	0.0227076	0.48305	1	1	1	1	1	1	1	1	1	1	0	0	0	0	0
Asgr2	0.963742	NA	-0.0636381	NA	-1	NA	5.88871e-11	NA	-1	-1	-1	-1	-1	-1	-1	-1	-1	-1	-1	-1	-1	-1	-1
Flot1	0.963718	3.306	0.35657	0.0095004	1	0	0.0239437	0.194659	1	1	1	1	1	0	1	1	1	1	0	0	0	0	0
Gfpt2	0.963684	12.6147	0.7617	-0.47882	1	0	0.0299014	0.23425	1	1	1	1	1	1	1	1	1	1	0	0	0	0	0
Rap2a	0.96368	3.68948	-0.42928	0.083946	-1	0	0.0199269	0.393111	-1	-1	-1	-1	-1	-1	-1	-1	-1	-1	0	0	0	0	0
2210016L21Rik	0.963675	3.62912	-0.45771	0.08111	-1	0	0.0187444	0.385719	-1	-1	-1	-1	-1	-1	-1	-1	-1	-1	0	0	0	0	0
Cbfa2t3	0.96366	2.61862	-1.1534	0.1358	-1	1	0.0239635	0.023049	-1	-1	-1	-1	-1	1	-1	1	-1	1	1	1	1	1	1
Vangl1	0.963654	3.37758	-0.31788	0.1161	-1	0	0.0398224	0.371375	-1	-1	-1	-1	-1	-1	-1	-1	-1	-1	0	0	0	0	0
Zfp296	0.963649	2.72308	-0.19196	0.15199	0	1	0.127567	0.0205368	0	0	0	0	0	1	1	0	1	0	1	1	1	1	1
Topbp1	0.963612	3.19121	-0.31087	0.092213	-1	1	0.0454265	0.0186993	-1	-1	-1	-1	-1	1	-1	-1	1	1	1	1	1	1	1
2810021B07Rik	0.963554	3.23197	-0.37263	0.080482	-1	1	0.0283454	0.0218351	-1	-1	-1	-1	-1	-1	-1	-1	1	1	1	1	1	1	1
Irgm1	0.963525	2.90905	1.2084	-0.061087	1	-1	0.0222326	0.0541809	1	1	1	1	1	-1	-1	-1	1	1	-1	-1	-1	-1	-1
Yeats2	0.963506	3.00412	-0.35736	0.062872	-1	1	0.0285099	0.0201767	-1	-1	-1	-1	-1	1	1	-1	-1	1	1	1	1	1	1
Rad51l3	0.963479	2.75858	-0.84695	0.08568	-1	1	0.0293542	0.0230657	-1	-1	-1	-1	-1	1	1	1	1	-1	1	1	1	1	1
Slfn8	0.963448	11.3828	0.7484	-0.3832	1	0	0.0241194	0.255634	1	1	1	1	1	1	1	1	1	1	0	0	0	0	0
Herc6	0.96343	2.70061	1.2206	0.020715	1	0	0.0280415	0.169491	1	1	1	1	1	0	1	0	1	0	0	0	0	0	0
Traf1	0.963394	6.66457	0.57854	-0.014627	1	0	0.0299997	0.487821	1	1	1	1	1	1	1	1	1	1	0	0	0	0	0
Jun	0.96339	3.01122	1.596	-0.085952	1	-1	0.0225614	0.0505174	1	1	1	1	1	-1	1	1	-1	-1	-1	-1	-1	-1	-1
Fads3	0.963384	9.86594	-0.4793	0.39344	-1	0	0.0262017	0.207912	-1	-1	-1	-1	-1	-1	-1	-1	-1	-1	0	0	0	0	0
AI661453	0.963379	3.36277	-0.98044	0.1424	-1	1	0.0193804	0.0329529	-1	-1	-1	-1	-1	-1	-1	-1	-1	1	1	1	1	1	1
Ltf	0.963372	2.7507	2.1434	-0.033273	1	0	0.0325397	0.153226	1	1	1	1	1	0	1	0	0	0	0	0	0	0	0
Wdr47	0.96329	3.29164	-1.1086	0.2092	-1	0	0.0204197	0.388619	-1	-1	-1	-1	-1	-1	-1	-1	-1	-1	0	0	0	0	0
Psat1	0.963271	NA	0.185759	NA	1	NA	6.40519e-11	NA	1	1	1	1	1	1	1	1	1	1	1	1	1	1	1
Selplg	0.963255	1.28634	-0.26719	0.10848	0	1	0.216982	0.0184588	0	0	0	0	0	1	1	1	1	1	1	1	1	1	1
Cebpd	0.963253	2.52704	1.3295	-0.03117	1	-1	0.0302155	0.0971703	1	1	1	1	1	-1	-1	-1	1	-1	-1	-1	-1	-1	-1
Duoxa2	0.963229	19.1998	0.62241	-1.6041	1	-1	0.0319688	0.0983897	1	1	1	1	1	1	1	1	1	1	-1	-1	-1	-1	-1
2310057J16Rik	0.963215	2.64033	-0.7556	0.087247	-1	1	0.0211654	0.0264976	-1	-1	-1	-1	-1	-1	1	-1	1	-1	1	1	1	1	1
Bub1	0.963159	NA	0.169594	NA	1	NA	6.53349e-11	NA	1	1	1	1	1	1	1	1	1	1	1	1	1	1	1
Zbtb5	0.963136	2.85827	0.58213	-0.082956	1	-1	0.0332309	0.020075	1	1	1	1	1	-1	-1	-1	1	-1	-1	-1	-1	-1	-1
Zxdc	0.963117	2.93877	-0.47849	0.062831	-1	1	0.0318356	0.0206699	-1	-1	-1	-1	-1	-1	1	1	1	1	1	1	1	1	1
Taf1c	0.963088	2.88403	-0.33621	0.12023	-1	1	0.0511476	0.0220817	-1	-1	-1	-1	-1	-1	1	-1	-1	1	1	1	1	1	1
Slfn2	0.963081	7.16551	0.78737	-0.14071	1	0	0.0233751	0.385041	1	1	1	1	1	1	1	1	1	1	0	0	0	0	0
1700001C19Rik	0.963076		-0.47897	-0.048711	-1	-1	0.0371379	0.0513316	-1	-1	-1	-1	-1	-1	-1	-1	-1	-1	-1	-1	-1	-1	-1
Cyp3a25	0.963035	23.9928	-0.14524	-1.6693	-1	0	0.0221831	0.301258	-1	-1	-1	-1	-1	-1	-1	-1	-1	-1	0	-1	-1	0	-1
Nfkbia	0.963011	2.82487	0.88162	-0.066365	1	-1	0.0193781	0.0411697	1	1	1	1	1	-1	1	-1	1	1	-1	-1	-1	-1	-1
Pbxip1	0.963008	7.05424	-0.17734	0.12655	-1	0	0.0422342	0.292085	-1	-1	-1	-1	-1	-1	-1	-1	-1	-1	0	0	0	0	0
Gm5068	0.962964	15.1506	0.29632	-0.13668	1	0	0.0610342	0.408636	1	1	1	1	1	1	1	1	1	1	0	0	0	0	0
Hoxb4	0.96296	2.73175	-0.74514	0.11391	-1	1	0.0263423	0.0213568	-1	-1	-1	-1	-1	-1	1	1	-1	1	1	1	1	1	1
Zfp629	0.962951	3.62688	-0.56435	0.08083	-1	0	0.0177138	0.387766	-1	-1	-1	-1	-1	-1	-1	-1	-1	-1	0	0	0	0	0
Ehbp1l1	0.962951	3.15319	-0.44695	0.10963	-1	1	0.0332527	0.0214907	-1	-1	-1	-1	-1	-1	-1	1	-1	1	1	1	1	1	1
Retnlg	0.962948	2.83977	2.2437	0.062711	0	1	0.138103	0.0991913	0	0	0	0	0	1	1	1	1	1	1	1	1	1	1
Tctex1d2	0.962887	3.77731	-0.12811	0.097944	-1	0	0.0790128	0.385348	-1	-1	-1	-1	-1	-1	-1	-1	-1	-1	0	0	0	0	0
Dennd4a	0.962847	3.13578	1.0605	-0.15568	1	-1	0.0207048	0.0300392	1	1	1	1	1	-1	1	1	1	1	-1	-1	-1	-1	-1
Itpr3	0.962832	2.81823	-0.17959	0.086182	0	1	0.1113	0.0182683	0	0	0	0	0	0	1	1	1	1	1	1	1	1	1
2610044O15Rik	0.96283	3.23094	-0.58545	0.083634	-1	1	0.0197933	0.0332061	-1	-1	-1	-1	-1	-1	1	-1	-1	-1	1	1	1	1	1
Snord123	0.962774	2.86413	-0.73324	0.12229	-1	1	0.0295745	0.0201092	-1	-1	-1	-1	-1	1	-1	1	-1	1	1	1	1	1	1
Ttc30a1	0.962765	8.57299	-0.62314	0.3819	-1	0	0.0229148	0.214727	-1	-1	-1	-1	-1	-1	-1	-1	-1	-1	0	0	0	0	0
Med20	0.962736	2.98183	-0.46971	0.08152	-1	1	0.0254208	0.0228803	-1	-1	-1	-1	-1	-1	-1	-1	1	1	1	1	1	1	1
Camta2	0.962735	2.7476	-0.41711	0.072677	-1	1	0.0287591	0.0204682	-1	-1	-1	-1	-1	-1	1	1	-1	1	1	1	1	1	1
Pde4b	0.962698	2.80785	1.3792	-0.15639	1	-1	0.0233922	0.0255388	1	1	1	1	1	1	-1	-1	1	-1	-1	-1	-1	-1	-1
Cxcl5	0.96258		1.8872	0.054369	1	1	0.0377179	0.0987711	1	1	1	1	1	1	1	1	1	1	1	1	1	1	1
Pdgfra	0.962575	4.01889	-0.5916	0.15257	-1	0	0.022841	0.338016	-1	-1	-1	-1	-1	-1	-1	-1	-1	-1	0	0	0	0	0
4931406C07Rik	0.962571		-0.26215	-0.04982	-1	-1	0.0572369	0.0321849	-1	-1	-1	-1	-1	-1	-1	-1	-1	-1	-1	-1	-1	-1	-1
Spsb3	0.962541	2.77707	-0.41997	0.074115	-1	1	0.0267084	0.0230257	-1	-1	-1	-1	-1	-1	-1	1	1	-1	1	1	1	1	1
Ankrd10	0.962492	4.22613	-0.61467	0.13338	-1	0	0.0198216	0.352901	-1	-1	-1	-1	-1	-1	-1	-1	-1	-1	0	0	0	0	0
Rnd1	0.962442	3.11036	2.0708	-0.21788	1	-1	0.0308103	0.0249437	1	1	1	1	1	1	-1	-1	-1	-1	-1	-1	-1	-1	-1
C85492	0.962421	2.95406	-0.73586	0.11001	-1	1	0.0268049	0.0216645	-1	-1	-1	-1	-1	1	1	-1	1	-1	1	1	1	1	1
Wbp5	0.962406	19.9018	0.13887	-0.25475	1	0	0.0706997	0.203583	1	1	1	1	1	1	1	1	1	1	0	0	0	0	0
Rmnd5a	0.962326	3.63187	-0.309	-0.020666	-1	0	0.0281976	0.470311	-1	-1	-1	-1	-1	-1	-1	-1	-1	-1	0	0	0	0	0
Fam82a1	0.962292	2.25306	-0.62147	-0.041607	0	-1	0.146502	0.0441132	0	0	0	0	0	-1	-1	-1	-1	-1	-1	-1	-1	-1	-1
Gbp9	0.962277	2.68801	1.775	-0.037546	1	0	0.0245048	0.124638	1	1	1	1	1	0	1	0	1	0	0	0	0	0	0
Socs3	0.962269	2.72235	2.2079	-0.097121	1	-1	0.0225614	0.0627987	1	1	1	1	1	1	-1	-1	1	-1	-1	-1	-1	-1	-1
Btc	0.962267	13.8303	0.3705	-0.25485	1	0	0.0379975	0.258311	1	1	1	1	1	1	1	1	1	1	0	0	0	0	0
Nrn1	0.962249	20.5767	-0.12154	0.25429	-1	0	0.0808804	0.222941	-1	-1	-1	-1	-1	-1	-1	-1	-1	-1	0	0	0	0	0
Ptpn6	0.962229	14.8799	-0.17095	0.38472	-1	0	0.0500644	0.142077	-1	-1	-1	-1	-1	-1	-1	-1	-1	-1	0	0	0	0	0
Slc47a1	0.962192	3.65316	-0.29082	-0.090413	-1	0	0.0521096	0.426639	-1	-1	-1	-1	-1	-1	-1	-1	-1	-1	0	0	0	0	0
Zfp13	0.962089	3.00696	-0.65273	0.12039	-1	1	0.0266526	0.0225837	-1	-1	-1	-1	-1	1	-1	1	-1	-1	1	1	1	1	1
Cyb5	0.96204	NA	-0.0744346	NA	-1	NA	7.93915e-11	NA	-1	-1	-1	-1	-1	-1	-1	-1	-1	-1	-1	-1	-1	-1	-1
Abca6	0.96202	NA	-0.0823549	NA	-1	NA	7.96684e-11	NA	-1	-1	-1	-1	-1	-1	-1	-1	-1	-1	-1	-1	-1	-1	-1
Ly6i	0.961948	21.035	0.24298	-0.72053	1	0	0.0746907	0.107301	1	1	1	1	1	1	1	1	1	1	0	0	0	0	0
Ikzf4	0.961915	2.81128	1.5565	-0.19061	1	-1	0.0216131	0.0268161	1	1	1	1	1	1	1	-1	-1	1	-1	-1	-1	-1	-1
Oas2	0.961893	21.2206	0.29567	-1.2084	1	-1	0.0469378	0.0918479	1	1	1	1	1	1	1	1	1	1	-1	-1	-1	-1	-1
Dmgdh	0.96189	NA	-0.0822677	NA	-1	NA	8.14591e-11	NA	-1	-1	-1	-1	-1	-1	-1	-1	-1	-1	-1	-1	-1	-1	-1
Gng2	0.961866	4.139	-0.18345	0.15463	-1	0	0.0847367	0.36413	-1	-1	-1	-1	-1	-1	-1	-1	-1	-1	0	0	0	0	0
2010003K11Rik	0.961781	3.36257	0.90265	-0.10313	1	-1	0.0186391	0.0402719	1	1	1	1	1	-1	1	1	1	1	-1	-1	-1	-1	-1
Ncs1	0.96176	2.48934	-0.20796	0.10641	0	1	0.289133	0.017787	0	0	0	0	0	1	1	1	1	1	1	1	1	1	1
Shmt1	0.961759	11.4206	-0.23378	0.056367	-1	0	0.0434679	0.424299	-1	-1	-1	-1	-1	-1	-1	-1	-1	-1	0	0	0	0	0
Ccne1	0.961742	8.1252	0.57814	-0.096061	1	0	0.0301186	0.415388	1	1	1	1	1	1	1	1	1	1	0	0	0	0	0
Prss23	0.961738	11.1081	-0.62182	0.35924	-1	0	0.0228655	0.223485	-1	-1	-1	-1	-1	-1	-1	-1	-1	-1	0	0	0	0	0
Ehd2	0.961737	15.6602	-0.24578	0.59233	-1	0	0.0431388	0.135435	-1	-1	-1	-1	-1	-1	-1	-1	-1	-1	0	0	0	0	0
Arg2	0.961729	3.78039	1.315	0.030381	1	0	0.0230473	0.481602	1	1	1	1	1	1	1	1	1	1	0	0	0	0	0
Mlec	0.96172	12.4236	-0.18802	0.26615	-1	0	0.0393856	0.198111	-1	-1	-1	-1	-1	-1	-1	-1	-1	-1	0	0	0	0	0
D10Jhu81e	0.961707	24.3707	-0.050288	-1.6011	-1	0	0.0221784	0.179548	-1	-1	-1	-1	-1	-1	-1	-1	-1	-1	-1	-1	-1	0	0
Tlcd1	0.961687	1.83091	-0.48035	-0.064633	0	-1	0.153069	0.0290682	0	0	0	0	0	-1	-1	-1	-1	-1	-1	-1	-1	-1	-1
Exoc1	0.961633	2.77189	-0.29283	0.069785	-1	1	0.0372725	0.022143	-1	-1	-1	-1	-1	-1	1	-1	-1	1	1	1	1	1	1
2900092E17Rik	0.96162	2.86451	-0.38779	0.081908	-1	1	0.0442588	0.0182799	-1	-1	-1	-1	-1	1	1	-1	1	1	1	1	1	1	1
Golm1	0.961605	3.06997	-0.29916	0.12726	-1	1	0.0560932	0.0224391	-1	-1	-1	-1	-1	-1	1	1	-1	-1	1	1	1	1	1
Eif2c1	0.961588	3.40642	-0.44239	0.04334	-1	1	0.0202266	0.0351265	-1	-1	-1	-1	-1	1	1	-1	-1	-1	1	1	1	1	1
Gpat2	0.961545	10.0799	-0.58646	0.2305	-1	0	0.0241687	0.302679	-1	-1	-1	-1	-1	-1	-1	-1	-1	-1	0	0	0	0	0
Gm9706	0.961545	15.2281	1.154	-1.308	1	0	0.0257616	0.330299	1	1	1	1	1	1	1	1	1	1	0	0	0	0	0
9430023L20Rik	0.961498	2.72439	-0.72986	0.051268	-1	1	0.0229676	0.0369188	-1	-1	-1	-1	-1	1	-1	1	-1	1	1	1	1	1	1
Camk2n2	0.961483	3.61614	-0.37486	0.12983	-1	0	0.0358414	0.372582	-1	-1	-1	-1	-1	-1	-1	-1	-1	-1	0	0	0	0	0
Spred1	0.961453		0.50621	0.00079649	0	0	0.170663	0.440716	0	0	0	0	0	0	0	0	0	0	0	0	0	0	0
Zfp760	0.961384	3.35143	-1.0931	0.19166	-1	0	0.0197565	0.392691	-1	-1	-1	-1	-1	-1	-1	-1	-1	-1	0	0	0	0	0
Ly6a	0.96137	NA	0.150518	NA	1	NA	8.89801e-11	NA	1	1	1	1	1	1	1	1	1	1	1	1	1	1	1
Cyb561d1	0.961281	2.87815	-0.39455	0.073859	-1	1	0.0290735	0.0223447	-1	-1	-1	-1	-1	1	-1	1	-1	-1	1	1	1	1	1
Rhoq	0.961265	3.19302	-0.19688	0.081125	-1	1	0.0544692	0.0225056	-1	-1	-1	-1	-1	-1	1	-1	-1	1	1	1	1	1	1
Alkbh5	0.961238	3.00523	0.47696	-0.043618	1	-1	0.0313795	0.0272699	1	1	1	1	1	-1	-1	-1	-1	1	-1	-1	-1	-1	-1
Oaz2-ps	0.96123	2.82149	-0.46479	0.04842	-1	1	0.0301442	0.0244092	-1	-1	-1	-1	-1	1	1	1	1	-1	1	1	1	1	1
Thap3	0.961228	2.99643	-0.68665	0.10455	-1	1	0.0210147	0.0325274	-1	-1	-1	-1	-1	1	-1	-1	-1	-1	1	1	1	1	1
Osbpl11	0.961212	3.10557	-0.4946	0.067798	-1	1	0.0226254	0.0257637	-1	-1	-1	-1	-1	1	-1	1	-1	-1	1	1	1	1	1
Lrrc4c	0.961162	2.56821	-0.49656	-0.033872	0	-1	0.111077	0.0489299	0	0	0	0	0	-1	-1	-1	-1	-1	-1	-1	-1	-1	-1
Fbxl8	0.961135	3.07697	-0.71848	0.12689	-1	1	0.0295034	0.0208035	-1	-1	-1	-1	-1	1	1	-1	-1	1	1	1	1	1	1
Wdr1	0.961133	1.86048	0.26261	0.058253	0	1	0.213516	0.0253703	0	0	0	0	0	1	1	1	1	1	1	1	1	1	1
Shkbp1	0.961121	6.77074	-0.38601	0.17156	-1	0	0.0230091	0.266076	-1	-1	-1	-1	-1	-1	-1	-1	-1	-1	0	0	0	0	0
Ch25h	0.961064		2.9052	0.040386	0	0	0.134236	0.178292	0	0	0	0	0	0	0	0	0	0	0	0	0	0	0
Adm2	0.961047	NA	0.193049	NA	1	NA	9.39408e-11	NA	1	1	1	1	1	1	1	1	1	1	1	1	1	1	1
Calm3	0.960994	2.74489	-0.23614	0.070226	0	1	0.186639	0.0172013	0	0	0	0	0	1	1	1	1	1	1	1	1	1	1
Abcb6	0.960978	NA	-0.0648212	NA	-1	NA	9.503e-11	NA	-1	-1	-1	-1	-1	-1	-1	-1	-1	-1	-1	-1	-1	-1	-1
Rnf34	0.960965	2.93401	-0.8848	0.12714	-1	1	0.0362857	0.0199719	-1	-1	-1	-1	-1	1	1	1	-1	1	1	1	1	1	1
Adm	0.960953	3.15225	1.4904	-0.050516	1	0	0.0197015	0.130832	1	1	1	1	1	1	1	1	0	1	0	0	0	0	0
Pth1r	0.960939	2.99443	-1.6217	0.12734	-1	1	0.023069	0.0363918	-1	-1	-1	-1	-1	1	1	1	-1	-1	1	1	1	1	1
Pglyrp1	0.960916	3.97963	0.94414	0.082225	1	0	0.0300251	0.459737	1	1	1	1	1	1	1	1	1	1	0	0	0	0	0
Sac3d1	0.96084	2.91793	-0.57197	0.11063	-1	1	0.0322767	0.0201907	-1	-1	-1	-1	-1	1	1	-1	1	-1	1	1	1	1	1
Pqlc1	0.960781	12.4437	-0.44781	0.38783	-1	0	0.0175577	0.188786	-1	-1	-1	-1	-1	-1	-1	-1	-1	-1	0	0	0	0	0
Mgst3	0.96078	NA	-0.0932176	NA	-1	NA	9.8214e-11	NA	-1	-1	-1	-1	-1	-1	-1	-1	-1	-1	-1	-1	-1	-1	-1
Osmr	0.960752		0.83341	0.036223	1	1	0.0420396	0.0754572	1	1	1	1	1	1	1	1	1	1	1	1	1	1	1
Lbp	0.960686	5.13584	0.72205	-0.15874	1	0	0.0173097	0.352192	1	1	1	1	1	1	1	1	1	1	0	0	0	0	0
Aaas	0.960635	4.70576	-0.17448	0.10623	-1	0	0.055614	0.370738	-1	-1	-1	-1	-1	-1	-1	-1	-1	-1	0	0	0	0	0
Bbox1	0.960584	NA	-0.0912908	NA	-1	NA	1.01467e-10	NA	-1	-1	-1	-1	-1	-1	-1	-1	-1	-1	-1	-1	-1	-1	-1
Osbpl5	0.960567	2.9722	-0.5808	0.082132	-1	1	0.0233426	0.0252958	-1	-1	-1	-1	-1	-1	1	-1	-1	1	1	1	1	1	1
Sept11	0.960564	NA	0.0666586	NA	1	NA	1.01794e-10	NA	1	1	1	1	1	1	1	1	1	1	1	1	1	1	1
Sirpb1b	0.960549	24.149	0.12137	-1.5966	1	0	0.0231343	0.150125	1	1	1	1	1	1	1	1	1	1	0	0	0	1	1
Fbxo3	0.960548	2.64489	-0.33723	-0.020466	0	-1	0.177656	0.055306	0	0	0	0	0	-1	-1	-1	-1	-1	-1	-1	-1	-1	-1
Rarg	0.960502	5.49428	-0.635	0.20228	-1	0	0.0210577	0.436231	-1	-1	-1	-1	-1	-1	-1	-1	-1	-1	0	0	0	0	0
Sdpr	0.960472	3.4137	-0.91269	0.073661	-1	1	0.0227741	0.0392397	-1	-1	-1	-1	-1	1	1	1	-1	-1	1	1	1	1	1
Iffo2	0.960461	NA	0.0581659	NA	1	NA	1.03547e-10	NA	1	1	1	1	1	1	1	1	1	1	1	1	1	1	1
Gas2l1	0.960424	11.5886	-0.25065	0.29318	-1	0	0.0337028	0.176088	-1	-1	-1	-1	-1	-1	-1	-1	-1	-1	0	0	0	0	0
Pcyt2	0.960381	2.68408	-0.29313	-0.038927	0	-1	0.185457	0.0333127	0	0	0	0	0	-1	-1	-1	-1	-1	-1	-1	-1	-1	-1
Olfr125	0.960324		0.052883	-0.35485	0	0	0.193459	0.220803	0	0	0	0	0	0	0	0	0	0	0	0	0	0	0
Golga1	0.960263	4.002	-0.36448	0.099783	-1	0	0.0245974	0.368464	-1	-1	-1	-1	-1	-1	-1	-1	-1	-1	0	0	0	0	0
Prdm1	0.960258	2.4861	0.99807	-0.031437	1	-1	0.0302814	0.073495	1	1	1	1	1	-1	-1	-1	1	-1	-1	-1	-1	-1	-1
Kif21b	0.960235	8.17118	-0.49166	0.41234	-1	0	0.0447609	0.29803	-1	-1	-1	-1	-1	-1	-1	-1	-1	-1	0	0	0	0	0
Mt4	0.960184	NA	0.209488	NA	1	NA	1.08365e-10	NA	1	1	1	1	1	1	1	1	1	1	1	1	1	1	1
Chchd8	0.960156	2.73949	-0.7398	0.093097	0	1	0.101087	0.0201079	0	0	0	0	0	1	1	1	1	1	1	1	1	1	1
Tcfcp2	0.96014	3.08013	-0.44276	0.065149	-1	1	0.0272025	0.0224628	-1	-1	-1	-1	-1	1	-1	-1	1	1	1	1	1	1	1
Ahcy	0.960125		-0.23179	-0.040352	-1	-1	0.0464199	0.0442601	-1	-1	-1	-1	-1	-1	-1	-1	-1	-1	-1	-1	-1	-1	-1
Ikbkg	0.9601	NA	0.0639751	NA	1	NA	1.09859e-10	NA	1	1	1	1	1	1	1	1	1	1	1	1	1	1	1
Cerk	0.960097	3.55554	-0.40737	0.13454	-1	0	0.0359216	0.370969	-1	-1	-1	-1	-1	-1	-1	-1	-1	-1	0	0	0	0	0
Fam83g	0.960096	2.54356	-0.815	0.17161	-1	1	0.0509901	0.0184343	-1	-1	-1	-1	-1	1	-1	1	1	1	1	1	1	1	1
Gcsh	0.960085		-0.13808	-0.05019	-1	-1	0.077401	0.0329169	-1	-1	-1	-1	-1	-1	-1	-1	-1	-1	-1	-1	-1	-1	-1
Gulo	0.960081	24.193	-0.084219	-1.5625	-1	0	0.0273564	0.180582	-1	-1	-1	-1	-1	-1	-1	-1	-1	-1	0	-1	0	0	-1
Prx	0.960064	16.7892	-0.40466	1.1417	-1	0	0.0400396	0.109709	-1	-1	-1	-1	-1	-1	-1	-1	-1	-1	0	0	0	0	0
Gm7102	0.960039	3.17654	-0.47853	0.095607	-1	1	0.0263314	0.0282926	-1	-1	-1	-1	-1	-1	1	-1	-1	-1	1	1	1	1	1
Ogg1	0.960034	2.89558	-0.67126	0.11432	-1	1	0.029935	0.0212147	-1	-1	-1	-1	-1	-1	-1	1	1	1	1	1	1	1	1
4933426M11Rik	0.960033	2.90922	1.1125	-0.087314	1	-1	0.0306271	0.0309837	1	1	1	1	1	-1	-1	-1	-1	1	-1	-1	-1	-1	-1
Pcca	0.960002	NA	-0.0809967	NA	-1	NA	1.11637e-10	NA	-1	-1	-1	-1	-1	-1	-1	-1	-1	-1	-1	-1	-1	-1	-1
Cxcr2	0.959975	7.35168	1.4776	-0.2445	1	0	0.0251324	0.384426	1	1	1	1	1	1	1	1	1	1	0	0	0	0	0
Zfp677	0.959937	3.48224	-0.78246	0.16942	-1	1	0.02772	0.0236105	-1	-1	-1	-1	-1	1	-1	1	-1	-1	1	1	1	1	1
Birc2	0.959865	2.67333	1.1124	-0.094625	1	-1	0.0306329	0.0294544	1	1	1	1	1	-1	-1	-1	1	-1	-1	-1	-1	-1	-1
Tmem125	0.95983	2.93966	-0.29132	0.080155	-1	1	0.0396895	0.0226077	-1	-1	-1	-1	-1	1	-1	1	-1	-1	1	1	1	1	1
Vamp1	0.959789	3.36735	-0.5178	0.11309	-1	1	0.0253844	0.0291398	-1	-1	-1	-1	-1	-1	1	-1	-1	-1	1	1	1	1	1
Fdx1	0.959707	3.4919	0.12835	-0.075222	1	-1	0.0721559	0.0305333	1	1	1	1	1	-1	1	1	1	1	-1	-1	-1	-1	-1
1700037C18Rik	0.959682	24.3079	0.098664	-2.099	1	0	0.0234094	0.141199	1	1	1	1	1	1	1	1	1	1	0	1	0	0	1
E330016A19Rik	0.959653	6.61635	0.5178	-0.12326	1	0	0.0179797	0.346151	1	1	1	1	1	1	1	1	1	1	0	0	0	0	0
Etaa1	0.959652	2.65445	-0.42412	0.072085	0	1	0.120269	0.0179817	0	0	0	0	0	1	1	1	1	1	1	1	1	1	1
Gch1	0.95958	5.47318	0.20257	-0.13492	1	0	0.0571647	0.327406	1	1	1	1	1	1	1	1	1	1	0	0	0	0	0
Gtf2e1	0.959576	2.49171	-0.50325	0.055855	-1	1	0.0321746	0.0225342	-1	-1	-1	-1	-1	1	1	1	-1	1	1	1	1	1	1
Ccrl1	0.959569	3.40766	-0.93029	-0.011464	-1	0	0.0293219	0.246755	-1	-1	-1	-1	-1	-1	0	0	0	-1	0	0	0	0	0
Polr2d	0.959567	6.87888	-0.29566	0.16508	-1	0	0.0324828	0.301212	-1	-1	-1	-1	-1	-1	-1	-1	-1	-1	0	0	0	0	0
Map3k6	0.959564	3.61614	0.73065	0.093059	1	0	0.0334848	0.431331	1	1	1	1	1	1	1	1	1	1	0	0	0	0	0
Tmem165	0.959557	2.59829	-0.39255	0.097573	-1	1	0.0576853	0.0185275	-1	-1	-1	-1	-1	1	-1	1	1	1	1	1	1	1	1
Slco1b2	0.959453	NA	-0.0966013	NA	-1	NA	1.22008e-10	NA	-1	-1	-1	-1	-1	-1	-1	-1	-1	-1	-1	-1	-1	-1	-1
Fmo1	0.959447	NA	-0.0872656	NA	-1	NA	1.22127e-10	NA	-1	-1	-1	-1	-1	-1	-1	-1	-1	-1	-1	-1	-1	-1	-1
Samsn1	0.959425		0.92401	0.068287	1	1	0.0332057	0.067541	1	1	1	1	1	1	1	1	1	1	1	1	1	1	1
Ptgs2	0.959334	10.8071	1.5144	-0.73426	1	0	0.0233545	0.25916	1	1	1	1	1	1	1	1	1	1	0	0	0	0	0
Phtf1	0.959279	4.7399	-0.21063	0.09488	-1	0	0.0381234	0.332216	-1	-1	-1	-1	-1	-1	-1	-1	-1	-1	0	0	0	0	0
Eps15l1	0.959267	2.67653	-0.25504	0.088471	0	1	0.218712	0.0177622	0	0	0	0	0	1	1	1	1	1	1	1	1	1	1
LOC640793	0.959249		0.89638	0.038646	1	1	0.0429848	0.0763433	1	1	1	1	1	1	1	1	1	1	1	1	1	1	1
Cd59a	0.959231	4.03656	-0.17491	-0.063732	-1	0	0.0617866	0.427714	-1	-1	-1	-1	-1	-1	-1	-1	-1	-1	0	0	0	0	0
Slc25a24	0.959214	2.90162	-0.48627	0.14187	-1	1	0.0414716	0.0298902	-1	-1	-1	-1	-1	-1	-1	-1	-1	1	1	1	1	1	1
Chchd10	0.959209		-0.010177	-0.39095	0	0	0.37703	0.107815	0	0	0	0	0	0	0	0	0	0	0	0	0	0	0
Dem1	0.9592	2.85651	-0.73906	0.11293	-1	1	0.0363612	0.0205011	-1	-1	-1	-1	-1	1	1	1	-1	1	1	1	1	1	1
Anks3	0.959114	10.418	-0.49199	0.3867	-1	0	0.0206071	0.186562	-1	-1	-1	-1	-1	-1	-1	-1	-1	-1	0	0	0	0	0
Obfc2a	0.95899	1.88568	-0.22873	0.10608	0	1	0.338164	0.018862	0	0	0	0	0	1	1	1	1	1	1	1	1	1	1
Pde6d	0.958957	9.72099	-0.22766	0.21999	-1	0	0.0396329	0.256638	-1	-1	-1	-1	-1	-1	-1	-1	-1	-1	0	0	0	0	0
Ptprd	0.958949	NA	-0.0681923	NA	-1	NA	1.32223e-10	NA	-1	-1	-1	-1	-1	-1	-1	-1	-1	-1	-1	-1	-1	-1	-1
Mfap3	0.958938	4.43101	-0.2742	0.096537	-1	0	0.0320631	0.320415	-1	-1	-1	-1	-1	-1	-1	-1	-1	-1	0	0	0	0	0
Bcat2	0.958931	4.57424	-0.82904	0.16744	-1	0	0.0187997	0.359655	-1	-1	-1	-1	-1	-1	-1	-1	-1	-1	0	0	0	0	0
Ckap4	0.958913	NA	0.107877	NA	1	NA	1.32995e-10	NA	1	1	1	1	1	1	1	1	1	1	1	1	1	1	1
Smpd2	0.958896	17.2431	0.10294	-0.41891	1	0	0.0808442	0.15054	1	1	1	1	1	1	1	1	1	1	0	0	0	0	0
Gtl3	0.958859	4.9021	-0.68629	0.16058	-1	0	0.0185426	0.353031	-1	-1	-1	-1	-1	-1	-1	-1	-1	-1	0	0	0	0	0
Mtap1s	0.958842	2.86791	-0.29066	0.10662	-1	1	0.0561049	0.0234593	-1	-1	-1	-1	-1	-1	-1	1	1	-1	1	1	1	1	1
Tuba8	0.95884		-0.053572	0.96979	0	0	0.266086	0.113435	0	0	0	0	0	0	0	0	0	0	0	0	0	0	0
Gm14085	0.958794		-0.083992	0.68579	0	0	0.203175	0.159572	0	0	0	0	0	0	0	0	0	0	0	0	0	0	0
D030056L22Rik	0.958752	2.5092	-0.58959	0.087418	-1	1	0.0386355	0.0197761	-1	-1	-1	-1	-1	-1	1	1	1	1	1	1	1	1	1
Ripk2	0.95875	2.92869	2.0447	-0.20233	1	-1	0.0237866	0.0298594	1	1	1	1	1	-1	-1	1	1	-1	-1	-1	-1	-1	-1
Steap1	0.958738		1.9046	-0.017368	0	0	0.128735	0.235373	0	0	0	0	0	0	0	0	0	0	0	0	0	0	0
Proc	0.958724	NA	-0.0593593	NA	-1	NA	1.3703e-10	NA	-1	-1	-1	-1	-1	-1	-1	-1	-1	-1	-1	-1	-1	-1	-1
Prkcdbp	0.958688	18.848	-0.40185	1.6069	-1	0	0.03576	0.187491	-1	-1	-1	-1	-1	-1	-1	-1	-1	-1	0	0	0	0	0
Bcdin3d	0.958667	2.68559	-0.71561	0.09303	0	1	0.125699	0.0196493	0	0	0	0	0	1	1	1	1	1	1	1	1	1	1
AA467197	0.958654		1.6622	0.18416	1	1	0.0429779	0.047039	1	1	1	1	1	1	1	1	1	1	1	1	1	1	1
Rnf41	0.958637	8.02726	-0.27738	0.17232	-1	0	0.0286687	0.265106	-1	-1	-1	-1	-1	-1	-1	-1	-1	-1	0	0	0	0	0
Dfna5	0.958636	3.19794	-0.42027	0.10244	-1	1	0.0299182	0.0303823	-1	-1	-1	-1	-1	-1	-1	-1	-1	1	1	1	1	1	1
Lyl1	0.958631	2.85052	-0.69896	0.15825	-1	1	0.0403506	0.0203052	-1	-1	-1	-1	-1	-1	-1	1	1	1	1	1	1	1	1
Dnajc12	0.958608	NA	0.0966037	NA	1	NA	1.39551e-10	NA	1	1	1	1	1	1	1	1	1	1	1	1	1	1	1
Gpx1	0.958584		0.019626	-0.11497	0	0	0.350001	0.368184	0	0	0	0	0	0	0	0	0	0	0	0	0	0	0
F830016B08Rik	0.95856	3.58335	0.97418	-0.027365	1	0	0.0194704	0.473539	1	1	1	1	1	1	1	1	1	1	0	0	0	0	0
Klhl20	0.9585	3.33009	-0.44843	0.0828	-1	1	0.0234628	0.0314785	-1	-1	-1	-1	-1	1	-1	-1	-1	-1	1	1	1	1	1
Ppme1	0.958483	4.17778	0.44019	-0.053097	1	0	0.0177761	0.416776	1	1	1	1	1	1	1	1	1	1	0	0	0	0	0
Uhrf1	0.95845	NA	0.13233	NA	1	NA	1.43069e-10	NA	1	1	1	1	1	1	1	1	1	1	1	1	1	1	1
Smc4	0.958361	15.5423	-0.21693	0.48659	-1	0	0.039159	0.132342	-1	-1	-1	-1	-1	-1	-1	-1	-1	-1	0	0	0	0	0
Fem1b	0.95834	6.86121	-0.27184	0.15003	-1	0	0.0323984	0.268978	-1	-1	-1	-1	-1	-1	-1	-1	-1	-1	0	0	0	0	0
Slpi	0.958338	NA	0.208061	NA	1	NA	1.4559e-10	NA	1	1	1	1	1	1	1	1	1	1	1	1	1	1	1
Fbxo5	0.958312	14.981	-0.2917	0.65148	-1	0	0.0488123	0.161107	-1	-1	-1	-1	-1	-1	-1	-1	-1	-1	0	0	0	0	0
Ankrd49	0.958307	3.13996	-0.31341	0.06769	-1	1	0.0309687	0.023069	-1	-1	-1	-1	-1	-1	-1	-1	1	1	1	1	1	1	1
Tnfrsf18	0.958286	2.84648	0.58531	0.11946	0	1	0.247176	0.0296845	0	0	0	0	0	1	1	1	1	1	1	1	1	1	1
Spata2L	0.958261	3.09395	-1.5771	0.15544	-1	1	0.0213597	0.0358515	-1	-1	-1	-1	-1	1	1	-1	-1	-1	1	1	1	1	1
Aadat	0.958239	24.5043	-0.13096	15.224	-1	0	0.019023	0.146786	-1	-1	-1	-1	-1	-1	-1	-1	-1	-1	-1	0	-1	0	-1
Zfp184	0.958233	7.70788	-0.32602	0.22825	-1	0	0.0393376	0.246241	-1	-1	-1	-1	-1	-1	-1	-1	-1	-1	0	0	0	0	0
Mcm3	0.958173	2.40688	-0.31362	0.12746	0	1	0.251838	0.018361	0	0	0	0	0	1	1	1	1	1	1	1	1	1	1
Akr7a5	0.958161	18.9167	-0.1331	0.20575	-1	0	0.0662554	0.219676	-1	-1	-1	-1	-1	-1	-1	-1	-1	-1	0	0	0	0	0
Ccdc88b	0.958136	NA	0.116214	NA	1	NA	1.50249e-10	NA	1	1	1	1	1	1	1	1	1	1	1	1	1	1	1
Als2cl	0.958071	2.6152	-0.56823	0.072493	-1	1	0.0342644	0.0221584	-1	-1	-1	-1	-1	1	1	1	1	-1	1	1	1	1	1
Lsm3	0.958069	9.16614	-0.23971	0.20607	-1	0	0.0377682	0.266671	-1	-1	-1	-1	-1	-1	-1	-1	-1	-1	0	0	0	0	0
Cbx2	0.958036	3.10931	-1.7723	0.23371	-1	1	0.0264099	0.0249086	-1	-1	-1	-1	-1	1	1	-1	-1	1	1	1	1	1	1
Il17ra	0.958025	2.84261	1.2583	-0.080925	1	-1	0.0306712	0.0378093	1	1	1	1	1	-1	-1	-1	-1	1	-1	-1	-1	-1	-1
Arid3a	0.957949	3.87817	-0.60304	0.21105	-1	0	0.0359341	0.356708	-1	-1	-1	-1	-1	-1	-1	-1	-1	-1	0	0	0	0	0
Apol10b	0.957845		1.1685	0.080857	1	1	0.0474441	0.0517294	1	1	1	1	1	1	1	1	1	1	1	1	1	1	1
Tradd	0.957833	2.99253	-0.46735	0.070615	-1	1	0.0369005	0.0208457	-1	-1	-1	-1	-1	-1	1	1	1	1	1	1	1	1	1
Cyp3a59	0.957811	NA	-0.141529	NA	-1	NA	1.58014e-10	NA	-1	-1	-1	-1	-1	-1	-1	-1	-1	-1	-1	-1	-1	-1	-1
Rbbp6	0.957795	14.3984	-0.41738	0.6485	-1	0	0.0237937	0.100762	-1	-1	-1	-1	-1	-1	-1	-1	-1	-1	0	0	0	0	0
Slfn3	0.957764	10.6541	0.92676	-0.2852	1	0	0.0349177	0.393304	1	1	1	1	1	1	1	1	1	1	0	0	0	0	0
Bdh2	0.95771	NA	-0.119781	NA	-1	NA	1.60507e-10	NA	-1	-1	-1	-1	-1	-1	-1	-1	-1	-1	-1	-1	-1	-1	-1
Bak1	0.957698	3.81551	0.1462	0.044582	1	0	0.0560991	0.41729	1	1	1	1	1	1	1	1	1	1	0	0	0	0	0
Cd300lf	0.957672	13.1667	0.83828	-0.69209	1	0	0.0258933	0.172347	1	1	1	1	1	1	1	1	1	1	0	0	0	0	0
Akr1d1	0.957653	22.0128	-0.27701	0.8801	-1	0	0.0842221	0.171054	-1	-1	-1	-1	-1	-1	-1	-1	-1	-1	0	0	0	0	0
Prkd2	0.957652	15.7268	-0.30184	0.6337	-1	0	0.0298678	0.109712	-1	-1	-1	-1	-1	-1	-1	-1	-1	-1	0	0	0	0	0
Rbpms2	0.957649	12.8374	-0.26802	0.16303	-1	0	0.03574	0.269246	-1	-1	-1	-1	-1	-1	-1	-1	-1	-1	0	0	0	0	0
AA881470	0.957605	12.5515	-0.35313	0.42317	-1	0	0.0267173	0.327635	-1	-1	-1	-1	-1	-1	-1	-1	-1	-1	0	0	0	0	0
Rasl11a	0.957602	3.73426	-0.47375	0.18615	-1	0	0.0407358	0.368854	-1	-1	-1	-1	-1	-1	-1	-1	-1	-1	0	0	0	0	0
Msn	0.957557	NA	0.0791981	NA	1	NA	1.6433e-10	NA	1	1	1	1	1	1	1	1	1	1	1	1	1	1	1
Tmem229b	0.957543	7.81529	-0.26679	0.206	-1	0	0.044115	0.282431	-1	-1	-1	-1	-1	-1	-1	-1	-1	-1	0	0	0	0	0
Mfsd11	0.957527	2.59973	-0.66031	0.099116	-1	1	0.0303015	0.0220267	-1	-1	-1	-1	-1	1	1	-1	1	-1	1	1	1	1	1
Mxd1	0.957508	2.56252	1.4226	0.023586	1	0	0.0379196	0.159059	1	1	1	1	1	1	0	0	0	0	0	0	0	0	0
Nop56	0.957499	NA	0.0593311	NA	1	NA	1.65786e-10	NA	1	1	1	1	1	1	1	1	1	1	1	1	1	1	1
Ifi44	0.957487	18.783	0.49124	-0.97965	1	0	0.0555765	0.190378	1	1	1	1	1	1	1	1	1	1	0	0	0	0	0
Ugt2b36	0.957453	NA	-0.079076	NA	-1	NA	1.66969e-10	NA	-1	-1	-1	-1	-1	-1	-1	-1	-1	-1	-1	-1	-1	-1	-1
Zfp7	0.957419	3.06168	-0.77642	0.18837	-1	1	0.0335249	0.0233545	-1	-1	-1	-1	-1	-1	1	1	-1	-1	1	1	1	1	1
5033406O09Rik	0.957391	3.61614	-0.5987	0.13694	-1	0	0.0252458	0.379546	-1	-1	-1	-1	-1	-1	-1	-1	-1	-1	0	0	0	0	0
Reln	0.957332	NA	-0.112926	NA	-1	NA	1.70103e-10	NA	-1	-1	-1	-1	-1	-1	-1	-1	-1	-1	-1	-1	-1	-1	-1
Cck	0.957328	NA	0.153149	NA	1	NA	1.70184e-10	NA	1	1	1	1	1	1	1	1	1	1	1	1	1	1	1
Sfxn3	0.957298	6.22575	-0.33719	0.18063	-1	0	0.0374309	0.280671	-1	-1	-1	-1	-1	-1	-1	-1	-1	-1	0	0	0	0	0
Ctdsp2	0.957297	2.59309	-0.27058	0.071963	-1	1	0.0614696	0.0191545	-1	-1	-1	-1	-1	1	-1	1	1	1	1	1	1	1	1
Cxcl10	0.957282	3.02491	3.2119	-0.17339	1	-1	0.0315251	0.0494549	1	1	1	1	1	1	-1	-1	-1	-1	-1	-1	-1	-1	-1
G0s2	0.957265	2.95907	-2.1779	0.2953	-1	1	0.0270136	0.0240231	-1	-1	-1	-1	-1	-1	-1	1	1	1	1	1	1	1	1
Gpr77	0.957217	2.9017	-1.0647	0.11041	-1	1	0.0243607	0.0291851	-1	-1	-1	-1	-1	1	1	-1	-1	1	1	1	1	1	1
H2-M3	0.957208	NA	0.0816146	NA	1	NA	1.73333e-10	NA	1	1	1	1	1	1	1	1	1	1	1	1	1	1	1
Aard	0.957183	3.42095	-0.65943	-0.0089083	-1	0	0.023136	0.492677	-1	-1	-1	-1	-1	-1	-1	-1	-1	-1	0	0	0	0	0
Ly6d	0.957157	22.3308	0.025131	2.278	0	1	0.420629	0.0962416	0	0	0	0	0	0	0	0	0	0	1	1	1	1	1
Hist3h2a	0.957131	2.8834	-0.90692	0.18673	-1	1	0.0458214	0.0194206	-1	-1	-1	-1	-1	1	1	-1	1	1	1	1	1	1	1
Sord	0.957117	21.9482	-0.17074	0.71179	-1	0	0.0749237	0.138255	-1	-1	-1	-1	-1	-1	-1	-1	-1	-1	0	0	0	0	0
F13a1	0.95709	NA	0.110012	NA	1	NA	1.76484e-10	NA	1	1	1	1	1	1	1	1	1	1	1	1	1	1	1
Rgs18	0.957041	2.52576	1.0798	-0.040685	1	-1	0.0315002	0.0642024	1	1	1	1	1	-1	-1	-1	1	-1	-1	-1	-1	-1	-1
Tubb3	0.956993	NA	0.196757	NA	1	NA	1.79097e-10	NA	1	1	1	1	1	1	1	1	1	1	1	1	1	1	1
Ntm	0.956968	NA	-0.106712	NA	-1	NA	1.79778e-10	NA	-1	-1	-1	-1	-1	-1	-1	-1	-1	-1	-1	-1	-1	-1	-1
Xcl1	0.956964	2.74325	1.798	-0.1202	1	-1	0.0244466	0.041254	1	1	1	1	1	-1	1	-1	1	-1	-1	-1	-1	-1	-1
Pi16	0.95694	16.6282	0.36534	-0.41913	1	0	0.044021	0.26288	1	1	1	1	1	1	1	1	1	1	0	0	0	0	0
Ogfod2	0.956899	2.93467	-0.50124	0.055785	-1	1	0.0221491	0.0310288	-1	-1	-1	-1	-1	-1	-1	-1	1	1	1	1	1	1	1
Taf6l	0.956885	2.6143	-0.43046	0.067524	-1	1	0.0390944	0.0203207	-1	-1	-1	-1	-1	-1	1	1	1	1	1	1	1	1	1
Cybasc3	0.956873	2.5834	-0.50514	0.079467	-1	1	0.0318127	0.0218531	-1	-1	-1	-1	-1	1	-1	1	-1	1	1	1	1	1	1
Hoxb7	0.956856	15.741	-0.74704	1.4481	-1	0	0.0244804	0.240387	-1	-1	-1	-1	-1	-1	-1	-1	-1	-1	0	0	0	0	0
Tubb5	0.956812	3.53641	-0.20915	0.11563	-1	0	0.0658756	0.364043	-1	-1	-1	-1	-1	-1	-1	-1	-1	-1	0	0	0	0	0
Arfgap3	0.956806	12.5269	-0.23509	0.32503	-1	0	0.0383033	0.197432	-1	-1	-1	-1	-1	-1	-1	-1	-1	-1	0	0	0	0	0
Cyp2c39	0.956793	1.82354	0.134	-0.14074	0	-1	0.401234	0.020374	0	0	0	0	0	-1	-1	-1	-1	-1	-1	-1	-1	-1	-1
Snx33	0.956781	3.61183	-0.95871	0.14866	-1	0	0.0194621	0.412099	-1	-1	-1	-1	-1	-1	-1	-1	-1	-1	0	0	0	0	0
Mtbp	0.956677	3.70343	-0.21179	0.080026	-1	0	0.0408013	0.399114	-1	-1	-1	-1	-1	-1	-1	-1	-1	-1	0	0	0	0	0
Hrsp12	0.95667	NA	-0.0990158	NA	-1	NA	1.88052e-10	NA	-1	-1	-1	-1	-1	-1	-1	-1	-1	-1	-1	-1	-1	-1	-1
Lonrf3	0.956584	3.23881	-1.0166	0.17856	-1	1	0.0246393	0.0300959	-1	-1	-1	-1	-1	-1	1	-1	-1	-1	1	1	1	1	1
Ddah2	0.956554	10.0353	-0.43634	0.40242	-1	0	0.0354204	0.219148	-1	-1	-1	-1	-1	-1	-1	-1	-1	-1	0	0	0	0	0
Slc22a7	0.956549	NA	-0.145805	NA	-1	NA	1.91498e-10	NA	-1	-1	-1	-1	-1	-1	-1	-1	-1	-1	-1	-1	-1	-1	-1
Pigh	0.956512	2.79022	-0.4545	0.086074	-1	1	0.0465832	0.0195588	-1	-1	-1	-1	-1	1	-1	1	1	1	1	1	1	1	1
Acot12	0.956505	0.57456	0.29909	-0.056922	0	-1	0.172364	0.0193628	-1	0	0	0	0	-1	-1	-1	-1	-1	-1	-1	-1	-1	-1
3110056O03Rik	0.95649	2.7249	-0.62807	0.069108	-1	1	0.025338	0.0275026	-1	-1	-1	-1	-1	1	-1	1	-1	1	1	1	1	1	1
Slc29a1	0.956483	10.7315	-0.38424	0.16824	-1	0	0.0263881	0.294323	-1	-1	-1	-1	-1	-1	-1	-1	-1	-1	0	0	0	0	0
Ckap5	0.956481	7.91383	-0.31904	0.19796	-1	0	0.029303	0.278543	-1	-1	-1	-1	-1	-1	-1	-1	-1	-1	0	0	0	0	0
Mup5	0.956465	NA	-0.10668	NA	-1	NA	1.9392e-10	NA	-1	-1	-1	-1	-1	-1	-1	-1	-1	-1	-1	-1	-1	-1	-1
Atf3	0.956464	2.62906	2.3597	-0.066519	1	-1	0.0330658	0.0934707	1	1	1	1	1	-1	-1	-1	1	-1	-1	-1	-1	-1	-1
Clec3b	0.956422	11.3715	0.53059	-0.20817	1	0	0.0353867	0.368371	1	1	1	1	1	1	1	1	1	1	0	0	0	0	0
Ttyh3	0.95639	2.94711	-0.44504	0.089032	-1	1	0.0354228	0.021397	-1	-1	-1	-1	-1	-1	-1	1	1	1	1	1	1	1	1
Ralb	0.956389		-0.080454	0.14617	0	0	0.116748	0.324727	0	0	0	0	0	0	0	0	0	0	0	0	0	0	0
Cpeb1	0.956284	9.20425	-0.28915	0.30443	-1	0	0.0548812	0.294943	-1	-1	-1	-1	-1	-1	-1	-1	-1	-1	0	0	0	0	0
Dppa5a	0.956252	1.99592	-0.63575	0.19097	0	1	0.207326	0.018719	0	0	0	0	0	1	1	1	1	1	1	1	1	1	1
2700007P21Rik	0.956247	10.8013	-0.19015	0.23384	-1	0	0.0505413	0.213405	-1	-1	-1	-1	-1	-1	-1	-1	-1	-1	0	0	0	0	0
2310011J03Rik	0.956222	2.84484	-0.42966	0.063093	0	1	0.14033	0.0198487	0	0	0	0	0	1	1	1	1	1	1	1	1	1	1
Ugt2b38	0.956217	NA	-0.0715456	NA	-1	NA	2.01244e-10	NA	-1	-1	-1	-1	-1	-1	-1	-1	-1	-1	-1	-1	-1	-1	-1
Dgcr6	0.956162	13.2872	-0.25376	0.15618	-1	0	0.0364873	0.297521	-1	-1	-1	-1	-1	-1	-1	-1	-1	-1	0	0	0	0	0
Nucb2	0.956147		-0.136	0.21297	0	0	0.156241	0.388372	0	0	0	0	0	0	0	0	0	0	0	0	0	0	0
Orm2	0.956124	13.3602	0.34495	-0.19346	1	0	0.0421275	0.346754	1	1	1	1	1	1	1	1	1	1	0	0	0	0	0
Igf1	0.956123	NA	-0.085491	NA	-1	NA	2.04073e-10	NA	-1	-1	-1	-1	-1	-1	-1	-1	-1	-1	-1	-1	-1	-1	-1
Bbs12	0.956111	5.47318	-0.36568	0.23027	-1	0	0.0514798	0.328159	-1	-1	-1	-1	-1	-1	-1	-1	-1	-1	0	0	0	0	0
Coq10a	0.95605	2.82798	-0.49516	0.010357	-1	0	0.0235234	0.163904	-1	-1	-1	-1	-1	0	-1	0	-1	-1	0	0	0	0	0
Npy	0.956009	3.69745	0.76118	0.19939	1	0	0.051348	0.438055	1	1	1	1	1	1	1	1	1	1	0	0	0	0	0
9930111J21Rik1	0.956	16.0632	0.29201	-0.32282	1	0	0.0410909	0.204848	1	1	1	1	1	1	1	1	1	1	0	0	0	0	0
Gnptab	0.955988	2.36116	-0.37037	0.066902	0	1	0.143545	0.0183853	0	0	0	0	0	1	1	1	1	1	1	1	1	1	1
Klhl18	0.955984	3.07693	-0.41548	0.095592	-1	1	0.0321934	0.0298622	-1	-1	-1	-1	-1	1	-1	-1	-1	-1	1	1	1	1	1
Mx2	0.955906	2.62788	1.3966	-0.042194	1	-1	0.0328847	0.0829354	1	1	1	1	1	-1	-1	1	-1	-1	-1	-1	-1	-1	-1
Aen	0.9558	NA	0.0615558	NA	1	NA	2.14051e-10	NA	1	1	1	1	1	1	1	1	1	1	1	1	1	1	1
Ift57	0.955788		-0.14486	0.23262	0	0	0.103536	0.305472	0	0	0	0	0	0	0	0	0	0	0	0	0	0	0
Parp12	0.955721	17.6874	0.34109	-0.63591	1	0	0.0347197	0.133109	1	1	1	1	1	1	1	1	1	1	0	0	0	0	0
Ethe1	0.955718	15.961	-0.47772	0.55054	-1	0	0.0353655	0.189304	-1	-1	-1	-1	-1	-1	-1	-1	-1	-1	0	0	0	0	0
Fgfr1	0.955717	NA	0.0599616	NA	1	NA	2.16702e-10	NA	1	1	1	1	1	1	1	1	1	1	1	1	1	1	1
Il1rn	0.955697	2.96864	2.125	-0.031631	1	0	0.0269384	0.191586	1	1	1	1	1	1	1	0	0	0	0	0	0	0	0
Hspb2	0.955649	3.34462	-0.8691	0.19653	-1	1	0.0283454	0.0310138	-1	-1	-1	-1	-1	-1	-1	-1	-1	1	1	1	1	1	1
Dgcr8	0.955636	2.74999	-0.55314	0.083734	-1	1	0.0302843	0.0227692	-1	-1	-1	-1	-1	-1	1	-1	1	1	1	1	1	1	1
Chchd5	0.95562	2.58	-0.50982	0.083545	-1	1	0.0333012	0.0219675	-1	-1	-1	-1	-1	1	-1	1	-1	1	1	1	1	1	1
LOC545005	0.955581		0.84952	0.071919	1	1	0.0352824	0.0870318	1	1	1	1	1	1	1	1	1	1	1	1	1	1	1
Slc22a18	0.955557	NA	-0.0863681	NA	-1	NA	2.21845e-10	NA	-1	-1	-1	-1	-1	-1	-1	-1	-1	-1	-1	-1	-1	-1	-1
Ccdc28b	0.955482	2.98395	-0.46749	0.06817	-1	1	0.0371552	0.0217473	-1	-1	-1	-1	-1	-1	1	1	1	1	1	1	1	1	1
Dscr3	0.955429	3.65874	-0.32988	0.073532	-1	0	0.0245539	0.391949	-1	-1	-1	-1	-1	-1	-1	-1	-1	-1	0	0	0	0	0
Il3ra	0.955397		0.0030013	0.54591	0	0	0.474186	0.170009	0	0	0	0	0	0	0	0	0	0	0	0	0	0	0
Dscc1	0.955353		-0.025067	0.29004	0	0	0.399666	0.360051	0	0	0	0	0	0	0	0	0	0	0	0	0	0	0
Gm4902	0.955351	NA	0.149135	NA	1	NA	2.28631e-10	NA	1	1	1	1	1	1	1	1	1	1	1	1	1	1	1
Fam158a	0.955336	15.4622	-0.20883	0.12586	-1	0	0.0622771	0.385025	-1	-1	-1	-1	-1	-1	-1	-1	-1	-1	0	0	0	0	0
Camk2g	0.955311	2.59192	-0.67176	0.069265	-1	1	0.0336463	0.0253622	-1	-1	-1	-1	-1	1	1	1	-1	1	1	1	1	1	1
Crtap	0.955308	2.52946	-0.26677	0.086661	-1	1	0.0797829	0.0198043	-1	-1	-1	-1	-1	1	-1	1	1	1	1	1	1	1	1
Hmga2	0.955306	NA	0.110222	NA	1	NA	2.30131e-10	NA	1	1	1	1	1	1	1	1	1	1	1	1	1	1	1
Dgkd	0.955304	2.73106	-0.084707	0.079299	0	1	0.172576	0.0231494	0	0	0	0	0	1	0	1	0	1	1	1	1	1	1
Cldn3	0.955301	3.28426	-0.82282	0.11285	-1	1	0.0218471	0.0339045	-1	-1	-1	-1	-1	1	-1	-1	-1	-1	1	1	1	1	1
Hmox1	0.955293	2.8701	1.1487	-0.047728	1	-1	0.0327207	0.0668783	1	1	1	1	1	-1	-1	-1	1	-1	-1	-1	-1	-1	-1
Cxcl3	0.955271	3.6519	1.4308	0.032224	1	0	0.024864	0.496133	1	1	1	1	1	1	1	1	1	1	0	0	0	0	0
Relb	0.955209	2.6978	1.7787	-0.094978	1	-1	0.0324165	0.0477912	1	1	1	1	1	-1	1	-1	-1	-1	-1	-1	-1	-1	-1
Rras2	0.955192	4.92389	-0.14769	0.087209	-1	0	0.0539562	0.354007	-1	-1	-1	-1	-1	-1	-1	-1	-1	-1	0	0	0	0	0
Nkiras2	0.955161	9.33996	-0.37401	0.25158	-1	0	0.0223965	0.223286	-1	-1	-1	-1	-1	-1	-1	-1	-1	-1	0	0	0	0	0
Reep6	0.955098	11.7375	-0.26987	0.10431	-1	0	0.042117	0.389787	-1	-1	-1	-1	-1	-1	-1	-1	-1	-1	0	0	0	0	0
Ezh1	0.955098	2.73949	-0.55225	0.087235	0	1	0.121216	0.0195121	0	0	0	0	0	1	1	1	1	1	1	1	1	1	1
Enc1	0.955015	3.27246	0.45188	0.048647	1	0	0.0337369	0.460194	1	1	1	1	1	1	1	1	1	1	0	0	0	0	0
Cisd1	0.95497	17.722	-0.21267	0.29194	-1	0	0.0523304	0.245884	-1	-1	-1	-1	-1	-1	-1	-1	-1	-1	0	0	0	0	0
Mosc2	0.954969	24.138	-0.063186	0.75759	-1	0	0.0247061	0.159948	-1	-1	-1	-1	-1	-1	-1	-1	-1	-1	0	0	-1	-1	0
Slc17a1	0.954958	14.0713	0.08768	-0.22863	1	0	0.0875994	0.228474	1	1	1	1	1	1	1	1	1	1	0	0	0	0	0
Akr1c6	0.954938	22.6947	-0.052178	-1.4607	0	-1	0.286923	0.0947598	0	0	0	0	0	0	0	0	0	0	-1	-1	-1	-1	-1
Ak1	0.954866	3.61644	-0.21536	0.16498	-1	0	0.0874703	0.396543	-1	-1	-1	-1	-1	-1	-1	-1	-1	-1	0	0	0	0	0
Srgn	0.954858	3.81552	0.64394	0.043534	1	0	0.0301527	0.490439	1	1	1	1	1	1	1	1	1	1	0	0	0	0	0
Nlgn2	0.954834		-0.072747	0.42496	0	0	0.171749	0.218815	0	0	0	0	0	0	0	0	0	0	0	0	0	0	0
Rhof	0.954807	NA	0.111508	NA	1	NA	2.47407e-10	NA	1	1	1	1	1	1	1	1	1	1	1	1	1	1	1
Olfr1260	0.954794		0.63776	0.094413	1	1	0.0503289	0.0423762	1	1	1	1	1	1	1	1	1	1	1	1	1	1	1
Hacl1	0.954771	19.9639	-0.29359	0.86897	-1	0	0.052356	0.115826	-1	-1	-1	-1	-1	-1	-1	-1	-1	-1	0	0	0	0	0
Tspyl4	0.954767	19.7059	-0.64839	2.3862	-1	0	0.0192191	0.118089	-1	-1	-1	-1	-1	-1	-1	-1	-1	-1	0	0	0	0	0
AI467606	0.954766	8.19449	-0.47775	0.4402	-1	0	0.0594461	0.301776	-1	-1	-1	-1	-1	-1	-1	-1	-1	-1	0	0	0	0	0
Mcm7	0.954759	3.8824	-0.24129	0.1021	-1	0	0.0461726	0.383601	-1	-1	-1	-1	-1	-1	-1	-1	-1	-1	0	0	0	0	0
Plac8	0.954742	17.277	0.31447	-0.33739	1	0	0.0588701	0.267127	1	1	1	1	1	1	1	1	1	1	0	0	0	0	0
Gdf2	0.954681	2.85253	-1.2547	0.095717	-1	1	0.032095	0.0333994	-1	-1	-1	-1	-1	1	1	1	1	-1	1	1	1	1	1
Exosc6	0.954651	2.71732	-0.37786	0.096409	-1	1	0.0406097	0.0243943	-1	-1	-1	-1	-1	-1	1	-1	1	-1	1	1	1	1	1
Gtf2ird1	0.954643	2.15564	-0.51308	0.072382	0	1	0.246989	0.018813	0	0	0	0	0	1	1	1	1	1	1	1	1	1	1
Prmt2	0.954527	7.66886	-0.46554	0.35928	-1	0	0.0471559	0.29296	-1	-1	-1	-1	-1	-1	-1	-1	-1	-1	0	0	0	0	0
2810055F11Rik	0.954514	12.6804	-0.34421	0.25043	-1	0	0.0277152	0.209177	-1	-1	-1	-1	-1	-1	-1	-1	-1	-1	0	0	0	0	0
Acy3	0.954485	NA	-0.0555688	NA	-1	NA	2.59143e-10	NA	-1	-1	-1	-1	-1	-1	-1	-1	-1	-1	-1	-1	-1	-1	-1
Gamt	0.954477	NA	-0.141249	NA	-1	NA	2.5945e-10	NA	-1	-1	-1	-1	-1	-1	-1	-1	-1	-1	-1	-1	-1	-1	-1
Ivd	0.954399	NA	-0.0735751	NA	-1	NA	2.62349e-10	NA	-1	-1	-1	-1	-1	-1	-1	-1	-1	-1	-1	-1	-1	-1	-1
Gstm3	0.954385	23.8847	-0.16604	1.9802	0	1	0.110884	0.084585	0	0	0	0	0	0	0	0	0	0	1	1	1	1	1
Rela	0.954355	3.02094	0.8491	-0.08563	1	-1	0.0331169	0.0279727	1	1	1	1	1	1	-1	-1	-1	-1	-1	-1	-1	-1	-1
Camkk1	0.954345	7.46207	-1.0006	0.55182	-1	0	0.0285712	0.292119	-1	-1	-1	-1	-1	-1	-1	-1	-1	-1	0	0	0	0	0
Pten	0.954271	12.5407	-0.13628	0.016041	-1	0	0.0649597	0.477869	-1	-1	-1	-1	-1	-1	-1	-1	-1	-1	0	0	0	0	0
Runx1	0.954255	2.49775	1.0603	0.084048	0	1	0.151751	0.0477557	0	0	0	0	0	1	1	1	1	1	1	1	1	1	1
9530053H05Rik	0.954224		-0.11282	0.83438	0	0	0.141111	0.117589	0	0	0	0	0	0	0	0	0	0	0	0	0	0	0
Sema7a	0.954209	2.57503	2.1602	-0.024837	1	0	0.0358318	0.207455	1	1	1	1	1	0	0	0	1	0	0	0	0	0	0
Capg	0.95418	NA	0.101278	NA	1	NA	2.7066e-10	NA	1	1	1	1	1	1	1	1	1	1	1	1	1	1	1
Maff	0.954168	2.9986	2.1073	-0.064077	1	0	0.0264515	0.102197	1	1	1	1	1	0	1	1	0	0	0	0	0	0	0
Snx20	0.954155	19.7531	0.29346	-0.63065	1	0	0.0617428	0.185274	1	1	1	1	1	1	1	1	1	1	0	0	0	0	0
Pycard	0.954147		-0.069907	0.11026	0	0	0.152858	0.360111	0	0	0	0	0	0	0	0	0	0	0	0	0	0	0
Slc41a1	0.954099	3.43167	1.2443	-0.13815	1	-1	0.0205752	0.0432501	1	1	1	1	1	1	1	-1	1	1	-1	-1	-1	-1	-1
Msh2	0.954083	3.2204	0.60007	-0.084075	1	0	0.0199944	0.383007	1	1	1	1	1	1	1	1	1	1	0	0	0	0	0
Cdca8	0.954082	15.4045	-0.2082	0.62553	-1	0	0.0880719	0.164913	-1	-1	-1	-1	-1	-1	-1	-1	-1	-1	0	0	0	0	0
Incenp	0.954037	3.11436	-0.60459	0.17356	-1	1	0.0503005	0.0212642	-1	-1	-1	-1	-1	-1	-1	1	1	1	1	1	1	1	1
Mterf	0.954032	3.06027	-0.54808	0.099244	-1	1	0.0332874	0.0223635	-1	-1	-1	-1	-1	1	-1	-1	1	1	1	1	1	1	1
Chi3l3	0.953881	2.78885	1.1367	0.15683	0	1	0.218162	0.0364932	0	0	0	0	0	1	1	1	1	1	1	1	1	1	1
Dhrs3	0.95381	18.242	-0.2663	0.6072	-1	0	0.0300449	0.102835	-1	-1	-1	-1	-1	-1	-1	-1	-1	-1	0	0	0	0	0
Vipr1	0.953772		-0.41648	-0.044422	-1	-1	0.0444936	0.0480432	-1	-1	-1	-1	-1	-1	-1	-1	-1	-1	-1	-1	-1	-1	-1
Polm	0.953726	2.63046	-0.39209	0.081536	-1	1	0.0505461	0.020017	-1	-1	-1	-1	-1	1	1	1	-1	1	1	1	1	1	1
Rtn4rl1	0.953724	3.57764	-0.68271	0.096365	-1	0	0.0193745	0.405431	-1	-1	-1	-1	-1	-1	-1	-1	-1	-1	0	0	0	0	0
0610042G04Rik	0.953692	2.89527	-0.18451	0.067599	-1	1	0.0661875	0.0220572	-1	-1	-1	-1	-1	-1	-1	1	1	1	1	1	1	1	1
Fpr-rs6	0.953685	16.4739	0.58051	-0.82518	1	0	0.0334235	0.156078	1	1	1	1	1	1	1	1	1	1	0	0	0	0	0
Gcat	0.953603	19.9178	-0.20164	0.54013	-1	0	0.0594757	0.142267	-1	-1	-1	-1	-1	-1	-1	-1	-1	-1	0	0	0	0	0
Klf12	0.953592	NA	-0.0671011	NA	-1	NA	2.94142e-10	NA	-1	-1	-1	-1	-1	-1	-1	-1	-1	-1	-1	-1	-1	-1	-1
Iqgap1	0.953529	15.8326	0.21113	-0.16197	1	0	0.0582902	0.317844	1	1	1	1	1	1	1	1	1	1	0	0	0	0	0
Apold1	0.953424	3.15903	1.2933	-0.070001	1	-1	0.0206525	0.0887154	1	1	1	1	1	1	1	1	-1	1	-1	-1	-1	-1	-1
Lrfn3	0.953387	2.61775	-1.0343	0.12965	-1	1	0.0248465	0.0286584	-1	-1	-1	-1	-1	-1	1	-1	1	-1	1	1	1	1	1
Wdr81	0.953386	2.50389	-0.80644	0.10333	-1	1	0.0373898	0.0221322	-1	-1	-1	-1	-1	-1	1	1	1	1	1	1	1	1	1
Lrrc20	0.953366	7.73948	-0.63384	0.31001	-1	0	0.0222512	0.254811	-1	-1	-1	-1	-1	-1	-1	-1	-1	-1	0	0	0	0	0
Arhgap8	0.953366		0.79882	-0.0097482	0	0	0.149517	0.211551	0	0	0	0	0	0	0	0	0	0	0	0	0	0	0
Nr0b2	0.953335	2.8312	-1.6886	0.17012	-1	1	0.0337266	0.0264362	-1	-1	-1	-1	-1	1	1	1	-1	1	1	1	1	1	1
Psmb10	0.953309	3.01905	0.55479	0.011843	1	0	0.0319934	0.169065	1	1	1	1	1	0	0	1	1	0	0	0	0	0	0
Ly75	0.953306	2.61157	1.12	0.034354	0	1	0.120904	0.0971847	0	0	0	0	0	1	1	1	1	1	1	1	1	1	1
Nkapl	0.953294	9.12379	-0.78771	0.5109	-1	0	0.0240448	0.21773	-1	-1	-1	-1	-1	-1	-1	-1	-1	-1	0	0	0	0	0
Chst13	0.953283	2.94758	-0.96288	0.12312	-1	1	0.0275287	0.0259565	-1	-1	-1	-1	-1	-1	-1	1	1	1	1	1	1	1	1
Slc25a21	0.953269	NA	-0.110303	NA	-1	NA	3.07723e-10	NA	-1	-1	-1	-1	-1	-1	-1	-1	-1	-1	-1	-1	-1	-1	-1
Sec14l2	0.953266	11.8194	-0.36325	0.17173	-1	0	0.0372847	0.344603	-1	-1	-1	-1	-1	-1	-1	-1	-1	-1	0	0	0	0	0
Csrnp1	0.953247	2.41493	1.7531	-0.056575	0	-1	0.106156	0.0673902	0	0	0	0	0	-1	-1	-1	-1	-1	-1	-1	-1	-1	-1
Edn1	0.953247	2.97331	1.0414	-0.048243	1	-1	0.0328459	0.0598326	1	1	1	1	1	1	-1	-1	-1	-1	-1	-1	-1	-1	-1
Kcne3	0.953206	3.40945	-0.5463	0.17224	-1	1	0.0451259	0.0239042	-1	-1	-1	-1	-1	-1	-1	-1	1	1	1	1	1	1	1
Abhd14b	0.953165		-0.30901	-0.064917	-1	-1	0.0819603	0.0323015	-1	-1	-1	-1	-1	-1	-1	-1	-1	-1	-1	-1	-1	-1	-1
Zbtb32	0.953153	2.86965	-0.72735	0.20714	-1	1	0.0669476	0.020007	-1	-1	-1	-1	-1	-1	1	1	1	1	1	1	1	1	1
Asns	0.953148	NA	0.169432	NA	1	NA	3.12958e-10	NA	1	1	1	1	1	1	1	1	1	1	1	1	1	1	1
Amy2a5	0.953144	NA	-0.0802589	NA	-1	NA	3.13148e-10	NA	-1	-1	-1	-1	-1	-1	-1	-1	-1	-1	-1	-1	-1	-1	-1
Mup9	0.953142	NA	-0.0955391	NA	-1	NA	3.13241e-10	NA	-1	-1	-1	-1	-1	-1	-1	-1	-1	-1	-1	-1	-1	-1	-1
Zfp36l2	0.953064	2.83405	0.90105	-0.10083	1	-1	0.0262232	0.0280637	1	1	1	1	1	1	-1	-1	-1	1	-1	-1	-1	-1	-1
Fam160b1	0.953017	3.45219	-0.42072	0.061138	-1	0	0.019765	0.410196	-1	-1	-1	-1	-1	-1	-1	-1	-1	-1	0	0	0	0	0
Hsd17b10	0.952985	2.51834	-0.1351	-0.053794	0	-1	0.128332	0.0278094	0	0	0	0	0	-1	-1	-1	0	-1	-1	-1	-1	-1	-1
Paqr4	0.952921	3.87872	-0.56084	0.14369	-1	0	0.0258241	0.355171	-1	-1	-1	-1	-1	-1	-1	-1	-1	-1	0	0	0	0	0
Dio1	0.952918	NA	-0.098078	NA	-1	NA	3.23122e-10	NA	-1	-1	-1	-1	-1	-1	-1	-1	-1	-1	-1	-1	-1	-1	-1
Procr	0.952893	16.8718	0.71662	-0.89542	1	0	0.0488949	0.239716	1	1	1	1	1	1	1	1	1	1	0	0	0	0	0
Cdc25a	0.952857	1.1253	-0.70035	0.080511	0	1	0.106719	0.0192924	0	0	0	0	0	1	1	1	1	1	1	1	1	1	1
Dpp4	0.952842	NA	-0.0740116	NA	-1	NA	3.26555e-10	NA	-1	-1	-1	-1	-1	-1	-1	-1	-1	-1	-1	-1	-1	-1	-1
Ccl7	0.952797	2.56075	3.4064	-0.020146	1	0	0.0362441	0.309061	1	1	1	1	1	1	0	0	0	0	0	0	0	0	0
Fhit	0.952756	4.6976	-0.18471	-0.046122	-1	0	0.0563674	0.445098	-1	-1	-1	-1	-1	-1	-1	-1	-1	-1	0	0	0	0	0
Gm16516	0.952752	2.97919	0.71008	-0.02942	1	-1	0.0235703	0.0846157	1	1	1	1	1	1	1	-1	-1	1	-1	-1	-1	-1	-1
Crip1	0.95275	9.57055	-0.32292	0.27989	-1	0	0.0370077	0.262354	-1	-1	-1	-1	-1	-1	-1	-1	-1	-1	0	0	0	0	0
Enpep	0.952673	5.87977	-0.31727	-0.011643	-1	0	0.0432198	0.485832	-1	-1	-1	-1	-1	-1	-1	-1	-1	-1	0	0	0	0	0
Vmac	0.952647	13.6029	-0.45482	0.54048	-1	0	0.019499	0.110176	-1	-1	-1	-1	-1	-1	-1	-1	-1	-1	0	0	0	0	0
Pycr2	0.952638	3.00093	-0.45871	0.094811	-1	1	0.0378715	0.0221522	-1	-1	-1	-1	-1	-1	-1	1	1	1	1	1	1	1	1
Tpm4	0.952618		0.60591	0.031067	1	1	0.0368312	0.0799713	1	1	1	1	1	1	1	1	1	1	1	1	1	1	1
1600014C23Rik	0.952556	NA	0.206932	NA	1	NA	3.39674e-10	NA	1	1	1	1	1	1	1	1	1	1	1	1	1	1	1
Arl16	0.952545	3.29415	-0.62239	0.11117	-1	1	0.0247233	0.0342736	-1	-1	-1	-1	-1	1	-1	-1	-1	-1	1	1	1	1	1
Hist1h2an	0.952528	4.15028	-0.13018	0.08201	-1	0	0.0692112	0.391279	-1	-1	-1	-1	-1	-1	-1	-1	-1	-1	0	0	0	0	0
Atxn7l3	0.952515	4.5319	-0.31653	0.11103	-1	0	0.0324983	0.354981	-1	-1	-1	-1	-1	-1	-1	-1	-1	-1	0	0	0	0	0
Acot13	0.952504	14.3093	-0.18305	0.106	-1	0	0.0500972	0.351377	-1	-1	-1	-1	-1	-1	-1	-1	-1	-1	0	0	0	0	0
Zscan20	0.952477	2.82208	-0.79712	0.12503	-1	1	0.0394604	0.0219072	-1	-1	-1	-1	-1	1	1	-1	1	1	1	1	1	1	1
Slc16a2	0.952431	NA	-0.0818227	NA	-1	NA	3.4554e-10	NA	-1	-1	-1	-1	-1	-1	-1	-1	-1	-1	-1	-1	-1	-1	-1
Akt3	0.952349	11.4852	0.28152	-0.03842	1	0	0.0582797	0.463734	1	1	1	1	1	1	1	1	1	1	0	0	0	0	0
Bicc1	0.952279	2.98691	-0.30662	0.076794	-1	1	0.0392556	0.0245539	-1	-1	-1	-1	-1	1	-1	1	-1	-1	1	1	1	1	1
Fscn1	0.952276	6.5901	0.36333	-0.037308	1	0	0.0281305	0.45433	1	1	1	1	1	1	1	1	1	1	0	0	0	0	0
Tctn2	0.952222	3.41721	-0.19357	0.13473	-1	0	0.083279	0.400735	-1	-1	-1	-1	-1	-1	-1	-1	-1	-1	0	0	0	0	0
Ccl27a	0.952203	13.8492	-0.19039	0.11937	-1	0	0.0428921	0.335994	-1	-1	-1	-1	-1	-1	-1	-1	-1	-1	0	0	0	0	0
Nat2	0.952175	3.08532	-0.48217	0.038263	-1	1	0.0353499	0.0353718	-1	-1	-1	-1	-1	1	1	1	1	-1	1	1	1	1	1
Klra4	0.952167	0.514116	1.6371	0.13329	0	1	0.127209	0.0256993	0	0	1	0	0	1	1	1	1	1	1	1	1	1	1
Hivep2	0.952166	2.88285	1.0483	-0.074452	1	-1	0.0257782	0.0425694	1	1	1	1	1	-1	1	1	-1	-1	-1	-1	-1	-1	-1
Olr1	0.952162	2.59578	3.2465	-0.080805	1	0	0.0346982	0.11054	1	1	1	1	1	0	0	0	0	1	0	0	0	0	0
Clp1	0.952148	3.41726	0.7616	-0.10037	1	-1	0.0216616	0.0393444	1	1	1	1	1	1	-1	1	1	1	-1	-1	-1	-1	-1
Cd8b1	0.952128	20.7788	0.30014	-0.93064	1	0	0.0626134	0.124001	1	1	1	1	1	1	1	1	1	1	0	0	0	0	0
Amica1	0.952115	12.887	0.3688	-0.25981	1	0	0.0283479	0.230723	1	1	1	1	1	1	1	1	1	1	0	0	0	0	0
Gpnmb	0.952041		-0.31628	1.4725	0	0	0.107304	0.337284	0	0	0	0	0	0	0	0	0	0	0	0	0	0	0
Defb1	0.952034	0.681967	2.4343	0.019653	1	0	0.0630714	0.115963	1	1	1	1	1	0	0	0	0	0	0	0	0	0	0
Trex1	0.952027	2.55401	1.4691	-0.047869	1	-1	0.0331929	0.0791437	1	1	1	1	1	-1	1	-1	-1	-1	-1	-1	-1	-1	-1
D17H6S56E-3	0.951954	0.617972	-1.0647	0.17593	0	1	0.140807	0.0215168	0	0	0	0	0	1	1	1	1	1	1	1	1	1	1
Tsr1	0.951897	2.80897	0.57514	-0.01503	1	0	0.0344458	0.100833	1	1	1	1	1	0	0	0	1	0	0	0	0	0	0
Angptl3	0.95189	15.5948	-0.22679	0.12605	-1	0	0.0651748	0.407387	-1	-1	-1	-1	-1	-1	-1	-1	-1	-1	0	0	0	0	0
Plekha2	0.951867	17.6449	-0.20304	0.87965	-1	0	0.0855438	0.149902	-1	-1	-1	-1	-1	-1	-1	-1	-1	-1	0	0	0	0	0
Tesk1	0.951833	2.69577	-0.46959	0.055484	0	1	0.129388	0.0223197	0	0	0	0	0	1	1	1	1	1	1	1	1	1	1
Plekhh3	0.951826	3.02367	-0.74748	0.080328	-1	1	0.0235026	0.0340864	-1	-1	-1	-1	-1	1	-1	1	-1	-1	1	1	1	1	1
Dcxr	0.951821	NA	-0.0878351	NA	-1	NA	3.75509e-10	NA	-1	-1	-1	-1	-1	-1	-1	-1	-1	-1	-1	-1	-1	-1	-1
Sema3f	0.951797	3.21791	-0.087615	0.078666	0	1	0.128415	0.0353393	0	0	0	0	0	0	0	1	0	0	1	1	1	1	1
Itgb3	0.951789	NA	0.129499	NA	1	NA	3.77126e-10	NA	1	1	1	1	1	1	1	1	1	1	1	1	1	1	1
Nxn	0.951785	3.70073	-0.32613	0.10625	-1	0	0.0370707	0.383099	-1	-1	-1	-1	-1	-1	-1	-1	-1	-1	0	0	0	0	0
Rab20	0.951761	2.89614	0.99111	-0.10203	1	-1	0.0269931	0.0297398	1	1	1	1	1	1	1	-1	-1	-1	-1	-1	-1	-1	-1
0610040B10Rik	0.951734	2.8819	-0.48716	0.066104	-1	1	0.037378	0.0233734	-1	-1	-1	-1	-1	1	-1	1	1	1	1	1	1	1	1
Ripply3	0.95172	2.60471	-1.6217	0.19212	-1	1	0.0368409	0.0241926	-1	-1	-1	-1	-1	1	1	1	-1	1	1	1	1	1	1
Cryz	0.951691	NA	-0.0542999	NA	-1	NA	3.82162e-10	NA	-1	-1	-1	-1	-1	-1	-1	-1	-1	-1	-1	-1	-1	-1	-1
Mki67	0.951668		0.49914	0.062753	1	1	0.0686966	0.0437965	1	1	1	1	1	1	1	1	1	1	1	1	1	1	1
Sult1c2	0.951615	NA	-0.141181	NA	-1	NA	3.86095e-10	NA	-1	-1	-1	-1	-1	-1	-1	-1	-1	-1	-1	-1	-1	-1	-1
Cd3d	0.951559	NA	0.145735	NA	1	NA	3.88984e-10	NA	1	1	1	1	1	1	1	1	1	1	1	1	1	1	1
BC017643	0.951543	14.1113	0.17284	-0.094414	1	0	0.0507707	0.374577	1	1	1	1	1	1	1	1	1	1	0	0	0	0	0
Itgb2	0.951448		-0.092063	0.75407	0	0	0.145485	0.142679	0	0	0	0	0	0	0	0	0	0	0	0	0	0	0
Zc3h12a	0.951444	2.95432	1.329	-0.0731	1	-1	0.0258996	0.0579575	1	1	1	1	1	-1	-1	-1	1	1	-1	-1	-1	-1	-1
Mier2	0.951435	4.41184	-0.24511	0.091797	-1	0	0.0366366	0.379804	-1	-1	-1	-1	-1	-1	-1	-1	-1	-1	0	0	0	0	0
1500012F01Rik	0.951415	1.24716	-0.33072	0.088886	0	1	0.236025	0.0210452	0	0	0	0	0	1	1	1	1	1	1	1	1	1	1
Srr	0.951404	9.39462	-0.28701	0.08298	-1	0	0.0337583	0.341675	-1	-1	-1	-1	-1	-1	-1	-1	-1	-1	0	0	0	0	0
Mdfi	0.951396	2.8554	-0.88814	0.15971	-1	1	0.0442913	0.0212614	-1	-1	-1	-1	-1	1	1	1	-1	1	1	1	1	1	1
Tsc22d1	0.951383	11.0577	-0.67155	0.40027	-1	0	0.0216234	0.214306	-1	-1	-1	-1	-1	-1	-1	-1	-1	-1	0	0	0	0	0
Pacsin2	0.95134	2.58712	-0.40683	0.061845	-1	1	0.040652	0.0218097	-1	-1	-1	-1	-1	-1	1	1	1	1	1	1	1	1	1
Tbc1d2	0.951327	13.29	-0.48492	0.66638	-1	0	0.0300251	0.163036	-1	-1	-1	-1	-1	-1	-1	-1	-1	-1	0	0	0	0	0
Fosl1	0.951274		0.71874	0.14955	1	1	0.0880126	0.0336	1	1	1	1	1	1	1	1	1	1	1	1	1	1	1
Asb11	0.951259	NA	0.167117	NA	1	NA	4.04997e-10	NA	1	1	1	1	1	1	1	1	1	1	1	1	1	1	1
Gcnt1	0.95124		-0.17501	0.34649	0	0	0.12171	0.300336	0	0	0	0	0	0	0	0	0	0	0	0	0	0	0
Klra23	0.951183	NA	0.160345	NA	1	NA	4.09087e-10	NA	1	1	1	1	1	1	1	1	1	1	1	1	1	1	1
Mast3	0.951177	3.18906	-0.97468	0.1354	-1	1	0.0247732	0.0300845	-1	-1	-1	-1	-1	-1	1	-1	-1	1	1	1	1	1	1
Amdhd1	0.951176	NA	-0.0678271	NA	-1	NA	4.09489e-10	NA	-1	-1	-1	-1	-1	-1	-1	-1	-1	-1	-1	-1	-1	-1	-1
Sdf2l1	0.951168	11.3508	-0.26576	0.39118	-1	0	0.0651616	0.272445	-1	-1	-1	-1	-1	-1	-1	-1	-1	-1	0	0	0	0	0
Zfp36	0.951153	3.58715	1.2991	-0.16949	1	0	0.0195504	0.408782	1	1	1	1	1	1	1	1	1	1	0	0	0	0	0
2410022L05Rik	0.951134	8.61142	-0.20791	0.18658	-1	0	0.0521426	0.252195	-1	-1	-1	-1	-1	-1	-1	-1	-1	-1	0	0	0	0	0
Acy1	0.951109	NA	-0.0773805	NA	-1	NA	4.13191e-10	NA	-1	-1	-1	-1	-1	-1	-1	-1	-1	-1	-1	-1	-1	-1	-1
Heatr1	0.951103	4.22692	0.82045	-0.11373	1	0	0.0191902	0.411533	1	1	1	1	1	1	1	1	1	1	0	0	0	0	0
Tmem199	0.951101	3.15938	-0.35414	0.089454	-1	1	0.0393977	0.0247501	-1	-1	-1	-1	-1	-1	-1	1	-1	1	1	1	1	1	1
Apoc4	0.951036	NA	-0.0835383	NA	-1	NA	4.17231e-10	NA	-1	-1	-1	-1	-1	-1	-1	-1	-1	-1	-1	-1	-1	-1	-1
S100a6	0.951027	NA	0.111433	NA	1	NA	4.17723e-10	NA	1	1	1	1	1	1	1	1	1	1	1	1	1	1	1
Ubl4	0.951006		-0.069124	0.18828	0	0	0.116446	0.232979	0	0	0	0	0	0	0	0	0	0	0	0	0	0	0
Clca1	0.950985	NA	-0.0815456	NA	-1	NA	4.20033e-10	NA	-1	-1	-1	-1	-1	-1	-1	-1	-1	-1	-1	-1	-1	-1	-1
Ikzf5	0.950956	3.47261	0.52895	-0.069227	1	-1	0.0217458	0.0409055	1	1	1	1	1	1	1	1	-1	1	-1	-1	-1	-1	-1
1810058I24Rik	0.950947	2.63843	0.46782	-0.074021	1	-1	0.0329553	0.0236244	1	1	1	1	1	-1	1	-1	1	-1	-1	-1	-1	-1	-1
Mcee	0.95094	NA	-0.0558542	NA	-1	NA	4.22555e-10	NA	-1	-1	-1	-1	-1	-1	-1	-1	-1	-1	-1	-1	-1	-1	-1
Grap	0.95093	3.0345	-0.53838	0.11281	-1	1	0.0405845	0.0220633	-1	-1	-1	-1	-1	-1	-1	1	1	1	1	1	1	1	1
Alas2	0.950894	10.1544	0.35349	-0.33609	1	0	0.0371954	0.226573	1	1	1	1	1	1	1	1	1	1	0	0	0	0	0
Gimap3	0.950838	23.7235	0.10263	-1.4417	1	0	0.0215576	0.212365	1	1	1	1	1	1	1	1	1	1	1	1	0	1	0
Polk	0.950817	3.32962	-0.40432	0.13628	-1	0	0.0402547	0.398726	-1	-1	-1	-1	-1	-1	-1	-1	-1	-1	0	0	0	0	0
Elk3	0.950817	3.76113	-0.88989	0.16592	-1	0	0.0214719	0.371138	-1	-1	-1	-1	-1	-1	-1	-1	-1	-1	0	0	0	0	0
Cd274	0.950769	6.78474	1.7021	-0.37136	1	0	0.0212217	0.376867	1	1	1	1	1	1	1	1	1	1	0	0	0	0	0
Klraq1	0.950745	8.19955	-0.37883	0.19201	-1	0	0.0219373	0.266901	-1	-1	-1	-1	-1	-1	-1	-1	-1	-1	0	0	0	0	0
Abcc6	0.950742	NA	-0.0751605	NA	-1	NA	4.33797e-10	NA	-1	-1	-1	-1	-1	-1	-1	-1	-1	-1	-1	-1	-1	-1	-1
Nfatc1	0.950705	3.54911	0.5308	-0.072531	1	0	0.0203805	0.408853	1	1	1	1	1	1	1	1	1	1	0	0	0	0	0
Cxcr4	0.950687		-5.8201	0.15022	0	1	0.334168	0.0194811	0	1	1	1	0	1	1	1	1	1	1	1	1	1	1
Arpc1b	0.950679	NA	0.0713012	NA	1	NA	4.37427e-10	NA	1	1	1	1	1	1	1	1	1	1	1	1	1	1	1
Slc2a1	0.950663	5.47318	0.32563	0.084121	1	0	0.0629839	0.449564	1	1	1	1	1	1	1	1	1	1	0	0	0	0	0
Gml	0.950658	NA	0.296183	NA	1	NA	4.38678e-10	NA	1	1	1	1	1	1	1	1	1	1	1	1	1	1	1
Dnalc4	0.950634	4.32829	-0.36683	0.087993	-1	0	0.0243793	0.335615	-1	-1	-1	-1	-1	-1	-1	-1	-1	-1	0	0	0	0	0
Hddc2	0.950625	9.74788	-0.098041	0.1496	-1	0	0.0958593	0.282705	-1	-1	-1	-1	-1	-1	-1	-1	-1	-1	0	0	0	0	0
Nit2	0.950603	NA	-0.080449	NA	-1	NA	4.41896e-10	NA	-1	-1	-1	-1	-1	-1	-1	-1	-1	-1	-1	-1	-1	-1	-1
Gbp2	0.950601	2.77823	2.5314	-0.041679	1	0	0.0285994	0.177113	1	1	1	1	1	1	0	1	0	0	0	0	0	0	0
Sh2d3c	0.950591	16.0517	-0.84159	1.7331	-1	0	0.026733	0.244834	-1	-1	-1	-1	-1	-1	-1	-1	-1	-1	0	0	0	0	0
Bbs10	0.95058	3.00634	-0.99999	0.16639	-1	1	0.0272839	0.0276575	-1	-1	-1	-1	-1	-1	1	1	-1	-1	1	1	1	1	1
Nop58	0.950571	2.50662	1.0673	-0.060513	1	-1	0.0320921	0.042688	1	1	1	1	1	1	-1	-1	-1	-1	-1	-1	-1	-1	-1
Lox	0.950493	NA	0.170677	NA	1	NA	4.48328e-10	NA	1	1	1	1	1	1	1	1	1	1	1	1	1	1	1
Lhpp	0.950488	2.67825	0.10704	-0.085278	0	-1	0.37844	0.0210299	0	0	0	0	0	-1	-1	-1	-1	-1	-1	-1	-1	-1	-1
Gbp3	0.950456	9.26073	1.4847	-0.6431	1	0	0.0218142	0.278705	1	1	1	1	1	1	1	1	1	1	0	0	0	0	0
Ttll12	0.950449	4.26952	-0.30558	0.093528	-1	0	0.0306594	0.361168	-1	-1	-1	-1	-1	-1	-1	-1	-1	-1	0	0	0	0	0
Ppp1r15a	0.950445	3.23424	1.0504	-0.047561	1	-1	0.0238435	0.0855618	1	1	1	1	1	1	1	1	-1	-1	-1	-1	-1	-1	-1
Tgtp2	0.950431	3.11476	1.6698	-0.014719	1	0	0.0303418	0.296902	1	1	1	1	1	0	0	1	1	0	0	0	0	0	0
2210411K11Rik	0.950419	2.46492	-0.48356	0.081965	0	1	0.146578	0.0200788	0	0	0	0	0	1	1	1	1	1	1	1	1	1	1
Litaf	0.950384	9.50754	0.46771	-0.23303	1	0	0.0203844	0.255636	1	1	1	1	1	1	1	1	1	1	0	0	0	0	0
Mapk7	0.950352		-0.07288	0.10753	0	0	0.178166	0.399882	0	0	0	0	0	0	0	0	0	0	0	0	0	0	0
Kif2a	0.950227	2.97919	-0.32087	0.091426	0	1	0.237235	0.0193958	0	0	0	0	0	1	1	1	1	1	1	1	1	1	1
Otub2	0.950216	3.14525	-0.81134	0.09438	-1	1	0.0283102	0.0291505	-1	-1	-1	-1	-1	-1	1	1	1	-1	1	1	1	1	1
Chchd6	0.95021		-0.050995	0.12095	0	0	0.176273	0.358451	0	0	0	0	0	0	0	0	0	0	0	0	0	0	0
Faah	0.9502	18.5622	-0.22026	0.35223	-1	0	0.057677	0.220375	-1	-1	-1	-1	-1	-1	-1	-1	-1	-1	0	0	0	0	0
Abcb9	0.950195	6.56095	-0.48893	0.21449	-1	0	0.0272629	0.299015	-1	-1	-1	-1	-1	-1	-1	-1	-1	-1	0	0	0	0	0
Cd14	0.950194	2.62951	2.0932	0.008433	1	0	0.0393837	0.376193	1	1	1	1	1	0	1	0	0	0	0	0	0	0	0
Zfp319	0.950177	3.03089	-0.47018	0.10843	-1	1	0.0321347	0.0329017	-1	-1	-1	-1	-1	1	-1	-1	-1	-1	1	1	1	1	1
Socs1	0.950171	2.69975	2.9169	-0.10408	0	-1	0.101442	0.0701175	0	0	0	0	0	-1	-1	-1	-1	-1	-1	-1	-1	-1	-1
Sema4g	0.950153	21.3425	-0.23613	1.0697	-1	1	0.0531741	0.0809911	-1	-1	-1	-1	-1	-1	-1	-1	-1	-1	1	1	1	1	1
Aldh1l1	0.950151	20.2952	-0.15145	0.28174	-1	0	0.0793156	0.281779	-1	-1	-1	-1	-1	-1	-1	-1	-1	-1	0	0	0	0	0
Hdc	0.950055	3.45114	0.89254	0.054482	1	0	0.032249	0.468413	1	1	1	1	1	1	1	1	1	1	0	0	0	0	0
Fam189b	0.950051	14.5957	-0.56281	1.0237	-1	0	0.0362343	0.115332	-1	-1	-1	-1	-1	-1	-1	-1	-1	-1	0	0	0	0	0
Ppapdc2	0.950026	2.59181	-0.46145	0.060674	-1	1	0.0380975	0.02376	-1	-1	-1	-1	-1	1	1	1	-1	1	1	1	1	1	1
Ddit4l	0.949964	3.25432	-1.3022	0.2378	-1	1	0.0462846	0.0216866	-1	-1	-1	-1	-1	-1	1	1	1	1	1	1	1	1	1
Hand2	0.949875	2.9848	-0.78669	0.11939	-1	1	0.0271562	0.0279237	-1	-1	-1	-1	-1	-1	1	-1	-1	1	1	1	1	1	1
Slc22a1	0.949844	NA	-0.0825777	NA	-1	NA	4.88056e-10	NA	-1	-1	-1	-1	-1	-1	-1	-1	-1	-1	-1	-1	-1	-1	-1
Npdc1	0.949789	NA	0.0763135	NA	1	NA	4.9156e-10	NA	1	1	1	1	1	1	1	1	1	1	1	1	1	1	1
2610029G23Rik	0.949786		-0.077822	0.092745	0	0	0.143436	0.405474	0	0	0	0	0	0	0	0	0	0	0	0	0	0	0
Dus2l	0.949769	1.9685	-0.34434	0.0676	0	1	0.212037	0.0195169	0	0	0	0	0	1	1	1	1	1	1	1	1	1	1
Sdc4	0.949706	10.7624	0.57709	-0.39703	1	0	0.0195672	0.177835	1	1	1	1	1	1	1	1	1	1	0	0	0	0	0
Pard6g	0.949699	2.6375	1.4432	0.0083722	1	0	0.0267959	0.355731	1	1	1	1	1	1	0	1	1	0	0	0	0	0	0
Rsl1	0.949642	2.94292	0.67648	-0.023077	1	0	0.0245974	0.105786	1	1	1	1	1	1	1	0	0	1	0	0	0	0	0
Ogn	0.949615	19.2659	-0.3154	0.72207	-1	0	0.0478397	0.137811	-1	-1	-1	-1	-1	-1	-1	-1	-1	-1	0	0	0	0	0
Nt5c3	0.949592	19.0808	0.31486	-0.84805	1	-1	0.0319445	0.094329	1	1	1	1	1	1	1	1	1	1	-1	-1	-1	-1	-1
Fam71f2	0.949518	4.45391	0.21527	0.060864	1	0	0.0612302	0.444008	1	1	1	1	1	1	1	1	1	1	0	0	0	0	0
Ppa2	0.949481	13.253	-0.1497	0.057219	-1	0	0.0587048	0.420662	-1	-1	-1	-1	-1	-1	-1	-1	-1	-1	0	0	0	0	0
Fstl1	0.94946	3.0241	-0.26311	0.10786	-1	1	0.0687272	0.0258388	-1	-1	-1	-1	-1	-1	-1	1	1	-1	1	1	1	1	1
Tnfsf14	0.949394		1.058	-0.00078273	0	0	0.127703	0.46395	0	0	0	0	0	0	0	0	0	0	0	0	0	0	0
Xdh	0.949342	2.61671	0.67814	-0.0016343	1	0	0.0290682	0.428942	1	1	1	1	1	1	0	0	1	0	0	0	0	0	0
Elovl6	0.949336		-0.46615	-0.17087	-1	-1	0.0709881	0.0504301	-1	-1	-1	-1	-1	-1	-1	-1	-1	-1	-1	-1	-1	-1	-1
Mmp11	0.949333	3.56477	-1.0059	0.14438	-1	0	0.0210244	0.380481	-1	-1	-1	-1	-1	-1	-1	-1	-1	-1	0	0	0	0	0
Rsad2	0.949208	10.8367	0.69456	-0.20286	1	0	0.0431133	0.417308	1	1	1	1	1	1	1	1	1	1	0	0	0	0	0
Pipox	0.949199	NA	-0.0912919	NA	-1	NA	5.30468e-10	NA	-1	-1	-1	-1	-1	-1	-1	-1	-1	-1	-1	-1	-1	-1	-1
Ccdc102a	0.949179	2.68295	-1.1036	0.15889	-1	1	0.0404956	0.0232371	-1	-1	-1	-1	-1	1	1	1	1	-1	1	1	1	1	1
Cyp2e1	0.949123		0.023512	-0.19985	0	0	0.372145	0.32856	0	0	0	0	0	0	0	0	0	0	0	0	0	0	0
Serpinb1a	0.949118	NA	-0.119515	NA	-1	NA	5.36006e-10	NA	-1	-1	-1	-1	-1	-1	-1	-1	-1	-1	-1	-1	-1	-1	-1
Gsta3	0.949103	NA	-0.128282	NA	-1	NA	5.37056e-10	NA	-1	-1	-1	-1	-1	-1	-1	-1	-1	-1	-1	-1	-1	-1	-1
Pxmp2	0.94909	NA	-0.0736738	NA	-1	NA	5.37943e-10	NA	-1	-1	-1	-1	-1	-1	-1	-1	-1	-1	-1	-1	-1	-1	-1
Lsm10	0.949079	3.16106	-0.66701	0.077474	-1	1	0.0239419	0.0347341	-1	-1	-1	-1	-1	-1	1	-1	-1	1	1	1	1	1	1
Gdf10	0.949074	2.71452	-0.85597	0.10639	-1	1	0.0258137	0.0300251	-1	-1	-1	-1	-1	-1	1	-1	1	-1	1	1	1	1	1
Cyp2j9	0.949057	2.12863	0.20333	-0.12184	0	-1	0.328919	0.0212841	0	0	0	0	0	-1	-1	-1	-1	-1	-1	-1	-1	-1	-1
Myo1g	0.948957	NA	0.104308	NA	1	NA	5.47192e-10	NA	1	1	1	1	1	1	1	1	1	1	1	1	1	1	1
Tnfrsf10b	0.948931	4.9756	0.32954	0.082335	1	0	0.0599842	0.448391	1	1	1	1	1	1	1	1	1	1	0	0	0	0	0
Ly6e	0.948915	NA	0.0585114	NA	1	NA	5.50138e-10	NA	1	1	1	1	1	1	1	1	1	1	1	1	1	1	1
Rcan3	0.948848	2.95935	-0.73004	0.11901	-1	1	0.0327674	0.0244429	-1	-1	-1	-1	-1	1	-1	-1	1	1	1	1	1	1	1
Ramp3	0.948829	NA	0.124256	NA	1	NA	5.56202e-10	NA	1	1	1	1	1	1	1	1	1	1	1	1	1	1	1
Snx10	0.948802	2.93418	1.193	-0.070907	1	-1	0.0263902	0.0528261	1	1	1	1	1	1	-1	-1	-1	1	-1	-1	-1	-1	-1
Mpst	0.948723	3.57077	-0.28846	-0.036216	-1	0	0.0388075	0.455	-1	-1	-1	-1	-1	-1	-1	-1	-1	-1	0	0	0	0	0
Jrk	0.948719	3.61286	-0.81357	0.20595	-1	0	0.0293084	0.395019	-1	-1	-1	-1	-1	-1	-1	-1	-1	-1	0	0	0	0	0
Mettl3	0.948689	3.717	-0.27496	0.073957	-1	0	0.0314568	0.385861	-1	-1	-1	-1	-1	-1	-1	-1	-1	-1	0	0	0	0	0
Sept8	0.948649		-0.3678	0.44429	-1	0	0.0336705	0.357436	-1	-1	-1	-1	-1	-1	-1	-1	-1	-1	0	0	0	0	0
Ttc36	0.948648	24.2696	-0.10191	2.0024	-1	0	0.0258618	0.172432	-1	-1	-1	-1	-1	-1	-1	-1	-1	-1	0	0	-1	-1	0
Ranbp1	0.94864	3.84723	0.16712	0.037243	1	0	0.0513546	0.481615	1	1	1	1	1	1	1	1	1	1	0	0	0	0	0
Rbm38	0.948626	NA	0.0662529	NA	1	NA	5.70763e-10	NA	1	1	1	1	1	1	1	1	1	1	1	1	1	1	1
Dusp10	0.948623	NA	0.0919669	NA	1	NA	5.70978e-10	NA	1	1	1	1	1	1	1	1	1	1	1	1	1	1	1
Egr1	0.948614	8.00868	1.6731	-0.65464	1	0	0.019721	0.252015	1	1	1	1	1	1	1	1	1	1	0	0	0	0	0
Nupr1	0.9486	0.817363	-0.48803	0.17605	0	1	0.327991	0.0225152	0	0	0	0	0	1	1	1	1	1	1	1	1	1	1
Fads1	0.948591	12.9906	-0.33408	0.20256	-1	0	0.0406965	0.322547	-1	-1	-1	-1	-1	-1	-1	-1	-1	-1	0	0	0	0	0
Nedd9	0.948411	24.0912	0.081451	-1.127	1	0	0.0258702	0.147253	1	1	1	1	1	1	1	1	1	1	0	0	1	1	0
Zfp949	0.948403	2.98081	0.61515	-0.085323	1	-1	0.0303044	0.0261931	1	1	1	1	1	1	-1	-1	-1	1	-1	-1	-1	-1	-1
Psmb8	0.948364	5.04609	0.38026	0.042266	1	0	0.0438559	0.453968	1	1	1	1	1	1	1	1	1	1	0	0	0	0	0
Bex2	0.948361		-0.043736	0.68941	0	0	0.357178	0.258575	0	0	0	0	0	0	0	0	0	0	0	0	0	0	0
Hsd3b3	0.948359	23.727	-0.11183	-2.7148	0	-1	0.211104	0.072474	0	0	0	0	0	0	0	0	0	0	-1	-1	-1	-1	-1
Nlrc5	0.948338	2.79609	0.72029	-0.0068991	1	0	0.0259692	0.29106	1	1	1	1	1	1	1	0	0	1	0	0	0	0	0
Steap4	0.948227	2.6612	1.9732	-0.12204	1	-1	0.0229165	0.0528539	1	1	1	1	1	-1	1	-1	1	1	-1	-1	-1	-1	-1
Fam160a2	0.948187		-0.071243	0.077278	0	0	0.128224	0.388796	0	0	0	0	0	0	0	0	0	0	0	0	0	0	0
Tmcc3	0.948056	3.74362	-0.54731	0.12166	-1	0	0.0263358	0.380418	-1	-1	-1	-1	-1	-1	-1	-1	-1	-1	0	0	0	0	0
Rnaseh2b	0.94803	3.08888	-0.20446	0.070892	-1	1	0.0487648	0.0333537	-1	-1	-1	-1	-1	1	-1	-1	-1	-1	1	1	1	1	1
Mpa2l	0.948008	2.75009	1.8301	-0.088648	1	-1	0.0266126	0.0671842	1	1	1	1	1	1	-1	-1	1	-1	-1	-1	-1	-1	-1
Bahd1	0.947992	3.61614	-0.37713	0.11277	-1	0	0.0350479	0.382439	-1	-1	-1	-1	-1	-1	-1	-1	-1	-1	0	0	0	0	0
Nos1ap	0.947964	2.51355	1.2161	-0.052964	0	-1	0.114612	0.0547811	0	0	0	0	0	-1	-1	-1	-1	-1	-1	-1	-1	-1	-1
Tonsl	0.947915	2.54694	-0.54771	0.096021	-1	1	0.0496538	0.021559	-1	-1	-1	-1	-1	-1	1	1	1	1	1	1	1	1	1
Clec4e	0.947912	9.35086	1.6836	-0.61708	1	0	0.0274081	0.305026	1	1	1	1	1	1	1	1	1	1	0	0	0	0	0
Trim12a	0.947829	10.6458	0.38217	-0.13176	1	0	0.0348876	0.365825	1	1	1	1	1	1	1	1	1	1	0	0	0	0	0
AI662270	0.947747	NA	0.101275	NA	1	NA	6.37469e-10	NA	1	1	1	1	1	1	1	1	1	1	1	1	1	1	1
Dlg5	0.947715	3.58458	-0.46394	0.13576	-1	0	0.0330549	0.369143	-1	-1	-1	-1	-1	-1	-1	-1	-1	-1	0	0	0	0	0
Aldh4a1	0.947678	NA	-0.0762352	NA	-1	NA	6.43032e-10	NA	-1	-1	-1	-1	-1	-1	-1	-1	-1	-1	-1	-1	-1	-1	-1
Lrg1	0.947647	2.60087	0.82439	0.014538	1	0	0.0425502	0.17024	1	1	1	1	1	0	0	1	0	0	0	0	0	0	0
Cyp3a11	0.947639	24.3237	-0.16391	7.2867	-1	1	0.0221276	0.0952691	-1	-1	-1	-1	-1	-1	-1	-1	-1	-1	1	-1	-1	1	-1
Rrm1	0.947621	2.7352	-0.2803	0.082702	0	1	0.208419	0.0200321	0	0	0	0	0	1	1	1	1	1	1	1	1	1	1
Lck	0.947616		0.49588	0.072582	1	1	0.0546702	0.0465696	1	1	1	1	1	1	1	1	1	1	1	1	1	1	1
Mme	0.947574	NA	-0.171403	NA	-1	NA	6.51429e-10	NA	-1	-1	-1	-1	-1	-1	-1	-1	-1	-1	-1	-1	-1	-1	-1
Klf16	0.947572	3.70258	-0.51826	0.18536	-1	0	0.0426142	0.369113	-1	-1	-1	-1	-1	-1	-1	-1	-1	-1	0	0	0	0	0
Slc28a2	0.94756	3.71058	-0.30524	0.19518	-1	0	0.0779623	0.385404	-1	-1	-1	-1	-1	-1	-1	-1	-1	-1	0	0	0	0	0
Ugt2b37	0.947514	1.54198	-0.218	-0.056199	0	-1	0.239344	0.0275477	0	0	0	0	0	-1	-1	-1	-1	-1	-1	-1	-1	-1	-1
Atp5d	0.947349		-0.15766	-0.044074	-1	-1	0.0778352	0.0398929	-1	-1	-1	-1	-1	-1	-1	-1	-1	-1	-1	-1	-1	-1	-1
Catsper4	0.947341	NA	0.0742968	NA	1	NA	6.70548e-10	NA	1	1	1	1	1	1	1	1	1	1	1	1	1	1	1
Cdc6	0.947336	NA	0.14157	NA	1	NA	6.7091e-10	NA	1	1	1	1	1	1	1	1	1	1	1	1	1	1	1
Slfn5	0.947319	13.1839	0.89187	-0.81373	1	0	0.0226479	0.180757	1	1	1	1	1	1	1	1	1	1	0	0	0	0	0
Klhdc5	0.947317	4.60158	-0.55891	0.11972	-1	0	0.0219494	0.367028	-1	-1	-1	-1	-1	-1	-1	-1	-1	-1	0	0	0	0	0
Amot	0.947308	3.58457	-0.56177	0.10494	-1	0	0.0243738	0.396712	-1	-1	-1	-1	-1	-1	-1	-1	-1	-1	0	0	0	0	0
Bcmo1	0.9473		0.026531	0.88831	0	0	0.3505	0.109531	0	0	0	0	0	0	0	0	0	0	0	0	0	0	0
Pfkl	0.94727	NA	0.0801711	NA	1	NA	6.76426e-10	NA	1	1	1	1	1	1	1	1	1	1	1	1	1	1	1
Abca3	0.947246	17.744	-0.15075	0.16012	-1	0	0.0674845	0.324228	-1	-1	-1	-1	-1	-1	-1	-1	-1	-1	0	0	0	0	0
Clic4	0.947243	2.73275	0.8301	-0.033585	1	-1	0.0274742	0.0804343	1	1	1	1	1	-1	-1	1	-1	1	-1	-1	-1	-1	-1
Lepre1	0.947242	3.04536	-0.25798	0.085578	0	1	0.256242	0.0200233	0	0	0	0	0	1	1	1	1	1	1	1	1	1	1
Mest	0.947241	2.99158	-1.0433	0.21014	-1	1	0.034451	0.0262621	-1	-1	-1	-1	-1	-1	1	-1	-1	1	1	1	1	1	1
Sele	0.947145	3.1246	2.4753	-0.19784	1	-1	0.0358322	0.038127	1	1	1	1	1	1	-1	-1	-1	-1	-1	-1	-1	-1	-1
Gpr68	0.947108		-0.015903	0.68374	0	0	0.429681	0.221469	0	0	0	0	0	0	0	0	0	0	0	0	0	0	0
Cxcl1	0.947074	2.6006	2.9298	-0.092069	1	-1	0.0359191	0.0912715	1	1	1	1	1	-1	-1	-1	1	-1	-1	-1	-1	-1	-1
Tmem67	0.947057		0.44382	0.041381	1	1	0.0446648	0.0571454	1	1	1	1	1	1	1	1	1	1	1	1	1	1	1
Crebbp	0.947021	3.92016	-0.20564	0.075119	-1	0	0.0412886	0.393083	-1	-1	-1	-1	-1	-1	-1	-1	-1	-1	0	0	0	0	0
Skp2	0.946999	3.19282	-1.012	0.1907	-1	1	0.0370029	0.0237299	-1	-1	-1	-1	-1	-1	-1	1	1	1	1	1	1	1	1
Irg1	0.946977	3.05833	2.4103	0.0082397	1	0	0.0323401	0.41423	1	1	1	1	1	0	1	1	0	0	0	0	0	0	0
Sertad3	0.94695	2.73124	-1.0244	0.17245	-1	1	0.0319119	0.0272699	-1	-1	-1	-1	-1	1	-1	1	-1	-1	1	1	1	1	1
Tnf	0.94693	2.62695	2.2747	-0.050755	1	0	0.0354857	0.123194	1	1	1	1	1	1	0	0	0	0	0	0	0	0	0
Thop1	0.946884	12.4082	-0.15041	0.24361	-1	0	0.061055	0.244357	-1	-1	-1	-1	-1	-1	-1	-1	-1	-1	0	0	0	0	0
Defb34	0.946883	2.38044	1.107	-0.062117	0	-1	0.109687	0.043667	0	0	0	0	0	-1	-1	-1	-1	-1	-1	-1	-1	-1	-1
Pfn2	0.946879	10.1813	-0.14545	0.21031	-1	0	0.0808623	0.285814	-1	-1	-1	-1	-1	-1	-1	-1	-1	-1	0	0	0	0	0
Cdk2ap2	0.946869	2.86914	-0.46061	0.087944	-1	1	0.0346287	0.0262859	-1	-1	-1	-1	-1	-1	1	-1	1	-1	1	1	1	1	1
Dak	0.946865	13.4051	-0.3893	0.27745	-1	0	0.0402937	0.251514	-1	-1	-1	-1	-1	-1	-1	-1	-1	-1	0	0	0	0	0
Cyp8b1	0.946792	14.9168	-0.67621	0.50254	-1	0	0.0512047	0.303243	-1	-1	-1	-1	-1	-1	-1	-1	-1	-1	0	0	0	0	0
Ddx11	0.946728	10.9488	-0.23372	0.24893	-1	0	0.0397936	0.390598	-1	-1	-1	-1	-1	-1	-1	-1	-1	-1	0	0	0	0	0
Cd52	0.946683	NA	0.101655	NA	1	NA	7.2705e-10	NA	1	1	1	1	1	1	1	1	1	1	1	1	1	1	1
Msh6	0.946623	3.26573	-0.34907	0.068836	0	1	0.193096	0.0210675	0	0	0	0	0	1	1	1	1	1	1	1	1	1	1
Inpp5d	0.946611	2.89289	-0.46713	0.13544	-1	1	0.0473719	0.0343824	-1	-1	-1	-1	-1	-1	-1	-1	-1	1	1	1	1	1	1
Slc13a5	0.946607	8.20126	1.1979	-0.29887	1	0	0.0293839	0.397152	1	1	1	1	1	1	1	1	1	1	0	0	0	0	0
Gstm1	0.946591	NA	-0.105346	NA	-1	NA	7.35333e-10	NA	-1	-1	-1	-1	-1	-1	-1	-1	-1	-1	-1	-1	-1	-1	-1
Ikbke	0.946584	2.97553	1.2815	-0.1167	1	-1	0.0270985	0.0369239	1	1	1	1	1	-1	-1	1	1	-1	-1	-1	-1	-1	-1
Pmm1	0.94654	11.5475	-0.23839	0.34849	-1	0	0.0673565	0.269678	-1	-1	-1	-1	-1	-1	-1	-1	-1	-1	0	0	0	0	0
Sccpdh	0.946535	2.44841	-0.541	0.1039	0	1	0.21464	0.0202871	0	0	0	0	0	1	1	1	1	1	1	1	1	1	1
Tchp	0.946506	3.04933	-0.41605	0.10412	-1	1	0.0659375	0.0211935	-1	-1	-1	-1	-1	1	1	1	1	-1	1	1	1	1	1
Rarres1	0.946466	NA	-0.100507	NA	-1	NA	7.46569e-10	NA	-1	-1	-1	-1	-1	-1	-1	-1	-1	-1	-1	-1	-1	-1	-1
L3mbtl3	0.946465	2.88389	-0.71878	0.13778	-1	1	0.0520792	0.0217354	-1	-1	-1	-1	-1	1	1	1	1	-1	1	1	1	1	1
Ifit3	0.94643		0.90361	0.057221	1	1	0.0414646	0.0801428	1	1	1	1	1	1	1	1	1	1	1	1	1	1	1
0610010O12Rik	0.946417	14.9114	0.28862	-0.27733	1	0	0.0370733	0.263448	1	1	1	1	1	1	1	1	1	1	0	0	0	0	0
Nfkbib	0.946402	2.70287	0.76716	-0.063271	0	-1	0.103166	0.0312995	0	0	0	0	0	-1	-1	-1	-1	-1	-1	-1	-1	-1	-1
Ctsw	0.946395	21.8776	0.1289	-0.50937	1	0	0.0924131	0.137348	1	1	1	1	1	1	1	1	1	1	0	0	0	0	0
Rfx1	0.946351	1.81202	-0.26028	0.067695	0	1	0.196287	0.0209787	0	0	0	0	0	1	1	1	1	1	1	1	1	1	1
Panx1	0.946345		0.69509	0.05354	1	1	0.0423146	0.0661252	1	1	1	1	1	1	1	1	1	1	1	1	1	1	1
Zfp652	0.946333	4.28878	-0.40874	0.1198	-1	0	0.0299154	0.348718	-1	-1	-1	-1	-1	-1	-1	-1	-1	-1	0	0	0	0	0
Itprip	0.94633	3.53745	0.37563	0.09012	1	0	0.0539499	0.445206	1	1	1	1	1	1	1	1	1	1	0	0	0	0	0
Emp1	0.946329	NA	0.133482	NA	1	NA	7.59163e-10	NA	1	1	1	1	1	1	1	1	1	1	1	1	1	1	1
Gpx3	0.946317		-0.13622	0.39968	0	0	0.131388	0.272122	0	0	0	0	0	0	0	0	0	0	0	0	0	0	0
Hexim1	0.946311	3.73254	-0.50636	0.067073	-1	0	0.0204197	0.472353	-1	-1	-1	-1	-1	-1	-1	-1	-1	-1	0	0	0	0	0
Fancf	0.946296	3.37691	-0.4767	0.093438	-1	0	0.0259988	0.392102	-1	-1	-1	-1	-1	-1	-1	-1	-1	-1	0	0	0	0	0
Tmie	0.94626	2.73304	-0.98271	0.012615	-1	0	0.0298482	0.221025	-1	-1	-1	-1	-1	-1	0	-1	0	0	0	0	0	0	0
Vps33a	0.946186	5.64334	-0.3723	0.1212	-1	0	0.0249574	0.329615	-1	-1	-1	-1	-1	-1	-1	-1	-1	-1	0	0	0	0	0
Chpf	0.946118	1.89985	-0.18065	0.086325	0	1	0.30377	0.021771	0	0	0	0	0	1	1	1	1	1	1	1	1	1	1
A430105I19Rik	0.946111	2.5384	-1.375	0.22072	0	1	0.112524	0.0212232	0	0	0	0	0	1	1	1	1	1	1	1	1	1	1
Krtap16-10	0.946107	4.21116	0.52808	0.067272	1	0	0.0420987	0.462848	1	1	1	1	1	1	1	1	1	1	0	0	0	0	0
Morn4	0.946091	6.92018	-0.37025	0.18476	-1	0	0.0310108	0.299125	-1	-1	-1	-1	-1	-1	-1	-1	-1	-1	0	0	0	0	0
4632434I11Rik	0.946081	9.88579	-0.51004	0.58447	-1	0	0.0592841	0.258884	-1	-1	-1	-1	-1	-1	-1	-1	-1	-1	0	0	0	0	0
Hmgcs2	0.946041	18.9804	-0.14846	0.23242	-1	0	0.0796773	0.266443	-1	-1	-1	-1	-1	-1	-1	-1	-1	-1	0	0	0	0	0
Zfp598	0.946029	2.79913	0.51815	-0.072894	1	-1	0.0399053	0.0244447	1	1	1	1	1	-1	-1	-1	1	-1	-1	-1	-1	-1	-1
Zfp768	0.945994	2.67944	-0.67722	0.073534	-1	1	0.025435	0.0330173	-1	-1	-1	-1	-1	-1	1	-1	-1	1	1	1	1	1	1
Zfp41	0.94598	3.61701	-1.3477	0.23407	-1	0	0.0234766	0.400052	-1	-1	-1	-1	-1	-1	-1	-1	-1	-1	0	0	0	0	0
Gas8	0.945937	16.4906	-0.19196	0.58481	-1	0	0.0676343	0.328839	-1	-1	-1	-1	-1	-1	-1	-1	-1	-1	0	0	0	0	0
Zfp784	0.945858	3.11864	-1.051	0.1359	-1	1	0.0395169	0.0260839	-1	-1	-1	-1	-1	-1	1	1	1	1	1	1	1	1	1
Aida	0.945857	10.9442	0.174	-0.0057781	1	0	0.0653834	0.493676	1	1	1	1	1	1	1	1	1	1	0	0	0	0	0
Vkorc1	0.945856	NA	-0.0657206	NA	-1	NA	8.03882e-10	NA	-1	-1	-1	-1	-1	-1	-1	-1	-1	-1	-1	-1	-1	-1	-1
Mapt	0.945831	19.3041	-0.32343	0.93636	-1	1	0.032233	0.0872272	-1	-1	-1	-1	-1	-1	-1	-1	-1	-1	1	1	1	1	1
Ift81	0.945781	3.59064	-0.67788	0.15352	-1	0	0.0277852	0.395084	-1	-1	-1	-1	-1	-1	-1	-1	-1	-1	0	0	0	0	0
S100a9	0.945745	9.93912	1.896	-0.78087	1	0	0.0279286	0.316471	1	1	1	1	1	1	1	1	1	1	0	0	0	0	0
Fam105a	0.945715	2.89063	-1.2647	0.21234	-1	1	0.0345075	0.0250004	-1	-1	-1	-1	-1	1	-1	-1	1	1	1	1	1	1	1
Zdhhc24	0.945622	3.55255	-0.43808	0.13436	-1	0	0.0382351	0.392535	-1	-1	-1	-1	-1	-1	-1	-1	-1	-1	0	0	0	0	0
Gm5039	0.945615	2.70733	0.7474	-0.026121	0	-1	0.115596	0.0720114	0	0	0	0	0	-1	-1	-1	-1	-1	-1	-1	-1	-1	-1
Irgq	0.945614	2.65981	0.43561	-0.07984	1	-1	0.0384414	0.0242533	1	1	1	1	1	-1	1	1	-1	-1	-1	-1	-1	-1	-1
Senp8	0.945577	3.40886	-0.87087	0.1541	-1	1	0.0294707	0.0284211	-1	-1	-1	-1	-1	1	1	-1	-1	-1	1	1	1	1	1
Dvl2	0.945542	3.38809	-0.3587	0.077923	-1	1	0.0312628	0.035152	-1	-1	-1	-1	-1	1	-1	-1	-1	-1	1	1	1	1	1
Tcta	0.945535	2.90822	-1.1681	0.088674	-1	1	0.0342039	0.0383037	-1	-1	-1	-1	-1	-1	1	1	1	1	1	1	1	1	1
Sel1l3	0.945478	3.37541	-0.7269	0.11247	-1	1	0.0276743	0.0297149	-1	-1	-1	-1	-1	-1	-1	-1	1	1	1	1	1	1	1
Pdrg1	0.945462	12.8981	-0.36826	0.43643	-1	0	0.0259777	0.32522	-1	-1	-1	-1	-1	-1	-1	-1	-1	-1	0	0	0	0	0
BC021891	0.945421	2.60169	-1.6131	0.17043	-1	1	0.0376446	0.027708	-1	-1	-1	-1	-1	1	1	1	-1	1	1	1	1	1	1
Havcr2	0.945413	NA	0.131457	NA	1	NA	8.47724e-10	NA	1	1	1	1	1	1	1	1	1	1	1	1	1	1	1
Dusp8	0.945407	2.79243	1.6981	-0.084901	1	-1	0.0275287	0.0673341	1	1	1	1	1	1	-1	-1	1	-1	-1	-1	-1	-1	-1
Khk	0.9453	13.9539	-0.16754	0.035113	-1	0	0.0741695	0.465095	-1	-1	-1	-1	-1	-1	-1	-1	-1	-1	0	0	0	0	0
Rpap3	0.945268	NA	0.0674086	NA	1	NA	8.62494e-10	NA	1	1	1	1	1	1	1	1	1	1	1	1	1	1	1
Cxcl2	0.945265	3.02932	3.2166	-0.10882	1	0	0.0259396	0.114755	1	1	1	1	1	1	1	1	0	0	0	0	0	0	0
Zbtb7a	0.945219	2.72421	-0.51381	0.063152	-1	1	0.0290365	0.0292547	-1	-1	-1	-1	-1	-1	1	1	-1	1	1	1	1	1	1
Sash3	0.945205	4.94796	-0.54173	0.2821	-1	0	0.0551343	0.36852	-1	-1	-1	-1	-1	-1	-1	-1	-1	-1	0	0	0	0	0
Car14	0.945159	24.2769	-0.1289	-4.2884	-1	0	0.0329176	0.12874	-1	-1	-1	-1	-1	-1	-1	-1	-1	-1	0	-1	0	0	-1
Maf	0.945157	2.64972	-0.85115	0.05226	-1	1	0.02714	0.0497601	-1	-1	-1	-1	-1	1	-1	1	-1	1	1	1	1	1	1
Reep4	0.945153	3.42888	-0.67299	0.14437	-1	0	0.026555	0.379342	-1	-1	-1	-1	-1	-1	-1	-1	-1	-1	0	0	0	0	0
Cyp3a57	0.945143	NA	-0.154308	NA	-1	NA	8.75441e-10	NA	-1	-1	-1	-1	-1	-1	-1	-1	-1	-1	-1	-1	-1	-1	-1
Mblac1	0.945111	3.03443	-0.84941	0.10477	-1	1	0.040683	0.0260924	-1	-1	-1	-1	-1	1	1	1	-1	1	1	1	1	1	1
Fam171b	0.945092	3.64004	-1.2412	0.097429	-1	0	0.0204919	0.446954	-1	-1	-1	-1	-1	-1	-1	-1	-1	-1	0	0	0	0	0
Tgfb3	0.945082	2.6346	-0.42593	0.10131	-1	1	0.0672108	0.0216571	-1	-1	-1	-1	-1	-1	1	1	1	1	1	1	1	1	1
Pim3	0.945065	3.00084	1.0877	-0.1203	1	-1	0.0389787	0.0280538	1	1	1	1	1	-1	-1	-1	-1	1	-1	-1	-1	-1	-1
Rhob	0.944989	3.00595	1.3289	-0.10897	1	-1	0.0274458	0.0402248	1	1	1	1	1	1	1	-1	-1	-1	-1	-1	-1	-1	-1
Wfdc1	0.944969	13.547	-0.26288	0.18225	-1	0	0.041963	0.316642	-1	-1	-1	-1	-1	-1	-1	-1	-1	-1	0	0	0	0	0
Bcor	0.944952	2.47513	0.65731	-0.083142	0	-1	0.130512	0.0235651	0	0	0	0	0	-1	-1	-1	-1	-1	-1	-1	-1	-1	-1
Dnajb2	0.944927	17.6758	-0.37651	0.98203	-1	0	0.0231091	0.185766	-1	-1	-1	-1	-1	-1	-1	-1	-1	-1	0	0	0	0	0
Ska1	0.944912	NA	0.18637	NA	1	NA	8.99837e-10	NA	1	1	1	1	1	1	1	1	1	1	1	1	1	1	1
Fign	0.944851	5.18016	-0.73872	0.13047	-1	0	0.0204092	0.380614	-1	-1	-1	-1	-1	-1	-1	-1	-1	-1	0	0	0	0	0
2610524H06Rik	0.944832	NA	0.0888775	NA	1	NA	9.08318e-10	NA	1	1	1	1	1	1	1	1	1	1	1	1	1	1	1
Lrrc66	0.94482	4.91269	0.42905	0.0041645	1	0	0.0347999	0.496279	1	1	1	1	1	1	1	1	1	1	0	0	0	0	0
Leng9	0.944818	3.62587	-0.31929	0.09398	-1	0	0.0356746	0.401355	-1	-1	-1	-1	-1	-1	-1	-1	-1	-1	0	0	0	0	0
Gm1966	0.944751	11.2423	0.54267	-0.18258	1	0	0.0412647	0.387379	1	1	1	1	1	1	1	1	1	1	0	0	0	0	0
Rreb1	0.94475	11.2066	-0.65001	0.55819	-1	0	0.023346	0.19124	-1	-1	-1	-1	-1	-1	-1	-1	-1	-1	0	0	0	0	0
Hist1h2ag	0.94472	2.99387	-0.10409	0.087029	0	1	0.159491	0.0251225	0	0	0	0	0	1	1	0	1	0	1	1	1	1	1
Rlim	0.94467		0.47483	0.0056406	0	0	0.137711	0.222216	0	0	0	0	0	0	0	0	0	0	0	0	0	0	0
Cd5	0.944647	21.8548	0.24169	-0.9517	1	0	0.0863432	0.135892	1	1	1	1	1	1	1	1	1	1	0	0	0	0	0
Micall1	0.944645	8.25899	-0.38526	0.24561	-1	0	0.0333499	0.234667	-1	-1	-1	-1	-1	-1	-1	-1	-1	-1	0	0	0	0	0
Fam171a1	0.944643	5.94408	-0.85923	0.25219	-1	0	0.0219948	0.326362	-1	-1	-1	-1	-1	-1	-1	-1	-1	-1	0	0	0	0	0
Arid5a	0.944631	2.73501	2.2504	-0.11692	1	-1	0.0276599	0.0629372	1	1	1	1	1	-1	1	-1	1	-1	-1	-1	-1	-1	-1
Stx11	0.944566	2.81165	1.5518	-0.0069045	1	0	0.0399881	0.366247	1	1	1	1	1	0	0	0	1	0	0	0	0	0	0
Spry1	0.944542	4.03731	-0.32492	-0.026423	-1	0	0.0368223	0.465548	-1	-1	-1	-1	-1	-1	-1	-1	-1	-1	0	0	0	0	0
Sdhaf1	0.944535	2.75102	-0.71627	0.082109	-1	1	0.026086	0.03288	-1	-1	-1	-1	-1	-1	1	-1	1	-1	1	1	1	1	1
Slc43a1	0.944453	3.40792	0.75398	-0.13857	1	-1	0.0276168	0.034528	1	1	1	1	1	1	1	-1	1	1	-1	-1	-1	-1	-1
Rnf39	0.944441	3.53718	-0.70206	0.089133	-1	1	0.0254411	0.035362	-1	-1	-1	-1	-1	-1	1	-1	1	-1	1	1	1	1	1
Pcsk6	0.944429	NA	-0.0529463	NA	-1	NA	9.52577e-10	NA	-1	-1	-1	-1	-1	-1	-1	-1	-1	-1	-1	-1	-1	-1	-1
Mthfd1	0.944415	NA	-0.0697282	NA	-1	NA	9.54126e-10	NA	-1	-1	-1	-1	-1	-1	-1	-1	-1	-1	-1	-1	-1	-1	-1
Pvr	0.94437	2.58897	1.055	0.0090403	1	0	0.0324313	0.29129	1	1	1	1	1	0	0	1	0	1	0	0	0	0	0
Hsdl1	0.944369	3.54812	-0.59051	0.12537	-1	0	0.0276911	0.396729	-1	-1	-1	-1	-1	-1	-1	-1	-1	-1	0	0	0	0	0
Hyi	0.944334	16.4645	-0.33033	0.40709	-1	0	0.0435299	0.249698	-1	-1	-1	-1	-1	-1	-1	-1	-1	-1	0	0	0	0	0
Ier2	0.944317	2.76174	0.77473	-0.082745	0	-1	0.122284	0.0268229	0	0	0	0	0	-1	-1	-1	-1	-1	-1	-1	-1	-1	-1
Zmym1	0.944301	2.70045	-0.70838	0.10794	-1	1	0.0339117	0.0257014	-1	-1	-1	-1	-1	1	-1	-1	1	1	1	1	1	1	1
Ncf4	0.9443		-0.031171	0.56809	0	0	0.350135	0.1835	0	0	0	0	0	0	0	0	0	0	0	0	0	0	0
Rcc1	0.944273	3.12652	-0.24366	0.081035	-1	1	0.0673032	0.023271	-1	-1	-1	-1	-1	-1	-1	1	1	1	1	1	1	1	1
Zfp414	0.944247	2.85059	-0.64518	0.077597	-1	1	0.0393919	0.0260817	-1	-1	-1	-1	-1	1	1	1	1	-1	1	1	1	1	1
Gm5643	0.944231	NA	0.0550783	NA	1	NA	9.74909e-10	NA	1	1	1	1	1	1	1	1	1	1	1	1	1	1	1
Cgref1	0.944221	2.29587	-0.53692	0.18374	0	1	0.246864	0.0211247	0	0	0	0	0	1	1	1	1	1	1	1	1	1	1
Dgat2	0.944211	NA	-0.0590518	NA	-1	NA	9.7713e-10	NA	-1	-1	-1	-1	-1	-1	-1	-1	-1	-1	-1	-1	-1	-1	-1
Slc38a4	0.944143	NA	-0.0982003	NA	-1	NA	9.8498e-10	NA	-1	-1	-1	-1	-1	-1	-1	-1	-1	-1	-1	-1	-1	-1	-1
LOC100504423	0.944087	10.8388	-0.56719	0.43337	-1	0	0.0220222	0.175825	-1	-1	-1	-1	-1	-1	-1	-1	-1	-1	0	0	0	0	0
Fas	0.944051	3.00702	0.93727	-0.087503	1	-1	0.0379758	0.0321186	1	1	1	1	1	-1	-1	-1	1	-1	-1	-1	-1	-1	-1
Pdk3	0.944032	NA	0.150039	NA	1	NA	9.97846e-10	NA	1	1	1	1	1	1	1	1	1	1	1	1	1	1	1
Fubp1	0.943978	19.8002	-0.11245	0.7049	-1	0	0.0795525	0.244204	-1	-1	-1	-1	-1	-1	-1	-1	-1	-1	0	0	0	0	0
Nudt7	0.943977		-0.80059	-0.049713	-1	-1	0.0527108	0.0667235	-1	-1	-1	-1	-1	-1	-1	-1	-1	-1	-1	-1	-1	-1	-1
Il1f9	0.943968		1.3561	0.073068	1	1	0.0510598	0.0729539	1	1	1	1	1	1	1	1	1	1	1	1	1	1	1
Zc3h8	0.943886	2.7643	-0.75555	0.099593	-1	1	0.0282625	0.0302556	-1	-1	-1	-1	-1	-1	1	-1	-1	1	1	1	1	1	1
Pank1	0.943868	NA	-0.0772367	NA	-1	NA	1.017e-09	NA	-1	-1	-1	-1	-1	-1	-1	-1	-1	-1	-1	-1	-1	-1	-1
Tenc1	0.94386	3.73713	0.45707	-0.093193	1	0	0.0254838	0.379474	1	1	1	1	1	1	1	1	1	1	0	0	0	0	0
Gls2	0.943852	NA	-0.0964879	NA	-1	NA	1.01894e-09	NA	-1	-1	-1	-1	-1	-1	-1	-1	-1	-1	-1	-1	-1	-1	-1
Anxa5	0.943824	2.63875	-0.1103	0.081044	0	1	0.397725	0.0221692	0	0	0	0	0	1	1	1	1	1	1	1	1	1	1
Mctp2	0.943813	2.87082	0.51134	-0.06779	1	-1	0.0399961	0.0254107	1	1	1	1	1	1	-1	-1	-1	-1	-1	-1	-1	-1	-1
Abi2	0.943784	10.8948	-0.27591	0.29697	-1	0	0.0419954	0.222006	-1	-1	-1	-1	-1	-1	-1	-1	-1	-1	0	0	0	0	0
Lgals3bp	0.943782	21.0871	0.15845	-0.51851	1	0	0.0695237	0.161025	1	1	1	1	1	1	1	1	1	1	0	0	0	0	0
AW146154	0.943755	3.13408	0.39818	-0.064096	1	-1	0.029679	0.0287955	1	1	1	1	1	1	1	1	-1	-1	-1	-1	-1	-1	-1
Zfp454	0.943743	2.72677	-1.0887	0.11316	-1	1	0.0367423	0.0281231	-1	-1	-1	-1	-1	1	1	1	1	-1	1	1	1	1	1
Ctla2b	0.94365	20.851	0.22703	-0.58735	1	0	0.0862565	0.217159	1	1	1	1	1	1	1	1	1	1	0	0	0	0	0
Ppp1r13l	0.943491	2.99755	-0.70457	0.14734	-1	1	0.0347322	0.0275906	-1	-1	-1	-1	-1	1	1	-1	-1	-1	1	1	1	1	1
Fzd1	0.94348	3.98195	-0.50527	0.1023	-1	0	0.0245237	0.385699	-1	-1	-1	-1	-1	-1	-1	-1	-1	-1	0	0	0	0	0
Kcnk5	0.943445	2.79417	-1.1531	0.12814	-1	1	0.0291985	0.0317066	-1	-1	-1	-1	-1	1	1	-1	1	-1	1	1	1	1	1
Stard8	0.943395	3.07075	-1.0991	0.089304	-1	1	0.0226029	0.0591534	-1	-1	-1	-1	-1	-1	1	-1	-1	-1	1	1	1	1	1
Arrb1	0.943388	11.572	-0.5394	0.5274	-1	0	0.0257159	0.187402	-1	-1	-1	-1	-1	-1	-1	-1	-1	-1	0	0	0	0	0
Cbs	0.9433	NA	-0.066193	NA	-1	NA	1.08611e-09	NA	-1	-1	-1	-1	-1	-1	-1	-1	-1	-1	-1	-1	-1	-1	-1
Vasp	0.943289		-0.028088	0.098483	0	0	0.279647	0.377842	0	0	0	0	0	0	0	0	0	0	0	0	0	0	0
Id4	0.943283	13.6781	-1.0552	1.2725	-1	0	0.0210244	0.13255	-1	-1	-1	-1	-1	-1	-1	-1	-1	-1	0	0	0	0	0
Pik3ap1	0.943271	3.266	0.8376	-0.082936	1	-1	0.0224533	0.0540388	1	1	1	1	1	1	-1	1	1	1	-1	-1	-1	-1	-1
Zfp606	0.943249	3.44911	-0.78046	0.1046	-1	1	0.0237105	0.0422688	-1	-1	-1	-1	-1	1	-1	-1	-1	-1	1	1	1	1	1
Setd7	0.943244	2.22106	-0.3957	0.084257	0	1	0.178085	0.0208184	0	0	0	0	0	1	1	1	1	1	1	1	1	1	1
Uap1l1	0.943184	6.28991	-0.17952	0.16004	-1	0	0.0814515	0.355567	-1	-1	-1	-1	-1	-1	-1	-1	-1	-1	0	0	0	0	0
Tug1	0.943177	3.20346	-0.43666	0.084507	-1	1	0.0307865	0.0339113	-1	-1	-1	-1	-1	1	-1	-1	-1	-1	1	1	1	1	1
Arsa	0.943157	NA	0.0636653	NA	1	NA	1.1041e-09	NA	1	1	1	1	1	1	1	1	1	1	1	1	1	1	1
Zfp764	0.943153	7.09171	-0.41473	0.18375	-1	0	0.0254026	0.291236	-1	-1	-1	-1	-1	-1	-1	-1	-1	-1	0	0	0	0	0
Me2	0.943149	3.42546	-0.26673	0.087913	-1	1	0.0471504	0.0350895	-1	-1	-1	-1	-1	1	-1	-1	-1	-1	1	1	1	1	1
Arv1	0.943145	3.16456	-0.37988	0.083289	-1	1	0.0356503	0.0275453	-1	-1	-1	-1	-1	1	-1	1	-1	-1	1	1	1	1	1
Icam1	0.943103	2.69389	2.3469	-0.12637	1	-1	0.0242884	0.0629593	1	1	1	1	1	1	-1	1	1	-1	-1	-1	-1	-1	-1
2010005H15Rik	0.943047		0.42617	0.12266	1	1	0.0727981	0.0432694	1	1	1	1	1	1	1	1	1	1	1	1	1	1	1
Car12	0.943029	NA	0.148916	NA	1	NA	1.12045e-09	NA	1	1	1	1	1	1	1	1	1	1	1	1	1	1	1
Lmnb1	0.942927		-0.058696	0.53198	0	0	0.181329	0.128244	0	0	0	0	0	0	0	0	0	0	0	0	0	0	0
Gpr171	0.942915	9.2555	0.46702	-0.10471	1	0	0.0360479	0.41247	1	1	1	1	1	1	1	1	1	1	0	0	0	0	0
Clcn2	0.942903	NA	-0.0690524	NA	-1	NA	1.13667e-09	NA	-1	-1	-1	-1	-1	-1	-1	-1	-1	-1	-1	-1	-1	-1	-1
Pdgfrb	0.942878	2.52342	-1.3269	0.1742	-1	1	0.0410746	0.0248195	-1	-1	-1	-1	-1	1	-1	1	1	1	1	1	1	1	1
Kif3a	0.942786	3.61614	-0.26642	0.076341	-1	0	0.0361859	0.393764	-1	-1	-1	-1	-1	-1	-1	-1	-1	-1	0	0	0	0	0
Birc5	0.942764	23.9841	0.16522	-1.7879	1	0	0.0275667	0.162685	1	1	1	1	1	1	1	1	1	1	0	1	1	0	0
Aldh3a2	0.942763		-0.076027	0.49064	0	0	0.142715	0.142279	0	0	0	0	0	0	0	0	0	0	0	0	0	0	0
Tmem60	0.94276	3.03692	-0.41465	0.056649	-1	1	0.0313333	0.0284998	-1	-1	-1	-1	-1	1	1	1	-1	-1	1	1	1	1	1
Uba6	0.942731	9.00523	-0.22723	0.20937	-1	0	0.0524269	0.282203	-1	-1	-1	-1	-1	-1	-1	-1	-1	-1	0	0	0	0	0
Cyp2c70	0.942719	NA	-0.0754393	NA	-1	NA	1.16083e-09	NA	-1	-1	-1	-1	-1	-1	-1	-1	-1	-1	-1	-1	-1	-1	-1
Acaa1b	0.942694	NA	-0.120887	NA	-1	NA	1.16412e-09	NA	-1	-1	-1	-1	-1	-1	-1	-1	-1	-1	-1	-1	-1	-1	-1
Mcm6	0.942688		-0.095551	0.16316	0	0	0.176511	0.380368	0	0	0	0	0	0	0	0	0	0	0	0	0	0	0
Sh3bgrl3	0.942683	NA	0.079564	NA	1	NA	1.16554e-09	NA	1	1	1	1	1	1	1	1	1	1	1	1	1	1	1
Abhd15	0.942675		-0.23343	-0.035009	-1	-1	0.0454027	0.0744728	-1	-1	-1	-1	-1	-1	-1	-1	-1	-1	-1	-1	-1	-1	-1
Dapp1	0.942561	4.53334	0.45962	0.00050871	1	0	0.0314754	0.499448	1	1	1	1	1	1	1	1	1	1	0	0	0	0	0
Dpysl2	0.942526	4.45643	-0.62845	0.14773	-1	0	0.0247271	0.39628	-1	-1	-1	-1	-1	-1	-1	-1	-1	-1	0	0	0	0	0
Satb1	0.942509	14.2837	0.59463	-0.55768	1	0	0.0357085	0.209367	1	1	1	1	1	1	1	1	1	1	0	0	0	0	0
Mlxipl	0.942458	19.5299	-0.29545	0.84388	-1	0	0.039374	0.106781	-1	-1	-1	-1	-1	-1	-1	-1	-1	-1	0	0	0	0	0
Ece1	0.942452	3.87967	-0.15743	-0.046782	-1	0	0.0650684	0.418913	-1	-1	-1	-1	-1	-1	-1	-1	-1	-1	0	0	0	0	0
Ripk1	0.942451	2.65485	0.73675	-0.067098	1	-1	0.0248989	0.0391724	1	1	1	1	1	-1	1	-1	1	1	-1	-1	-1	-1	-1
Upp1	0.942435	2.50609	1.5344	0.037298	1	0	0.044848	0.133689	1	1	1	1	1	0	0	1	0	0	0	0	0	0	0
Zbp1	0.942429		0.98128	0.08282	1	1	0.0399676	0.0982985	1	1	1	1	1	1	1	1	1	1	1	1	1	1	1
Tdp2	0.942384	2.73125	-0.77235	0.050178	-1	1	0.0278312	0.0484408	-1	-1	-1	-1	-1	-1	1	-1	1	1	1	1	1	1	1
Zfp365	0.942372	NA	0.157428	NA	1	NA	1.20746e-09	NA	1	1	1	1	1	1	1	1	1	1	1	1	1	1	1
Mark2	0.942353	16.0889	0.22952	-0.25789	1	0	0.0465852	0.222019	1	1	1	1	1	1	1	1	1	1	0	0	0	0	0
Trim46	0.942333		-0.15459	0.1672	0	0	0.109314	0.366626	0	0	0	0	0	0	0	0	0	0	0	0	0	0	0
Crim1	0.942252	16.3968	0.16225	-0.13414	1	0	0.0622675	0.328654	1	1	1	1	1	1	1	1	1	1	0	0	0	0	0
Unc119b	0.942235	2.47951	-0.36244	0.069133	0	1	0.170306	0.0213154	0	0	0	0	0	1	1	1	1	1	1	1	1	1	1
Gstm7	0.942228	21.5537	-0.17917	0.7999	-1	0	0.0796148	0.11798	-1	-1	-1	-1	-1	-1	-1	-1	-1	-1	0	0	0	0	0
Plec	0.942175		0.68797	0.0040426	0	0	0.13128	0.311928	0	0	0	0	0	0	0	0	0	0	0	0	0	0	0
Sult1b1	0.942164	23.9437	-0.094812	0.95984	-1	0	0.0238756	0.178724	-1	-1	-1	-1	-1	-1	-1	-1	-1	-1	-1	0	-1	-1	0
Sirt3	0.942156	12.5558	-0.28832	0.17338	-1	0	0.0393948	0.285221	-1	-1	-1	-1	-1	-1	-1	-1	-1	-1	0	0	0	0	0
Peo1	0.942155	3.10705	-0.6358	0.087246	-1	1	0.0278336	0.0316532	-1	-1	-1	-1	-1	1	-1	1	-1	-1	1	1	1	1	1
Unc5a	0.942094	3.31897	-0.9165	0.16335	-1	1	0.0290629	0.0341571	-1	-1	-1	-1	-1	-1	-1	-1	-1	1	1	1	1	1	1
Recql	0.942081	2.73732	-0.43138	0.079907	-1	1	0.0402836	0.0248021	-1	-1	-1	-1	-1	-1	1	-1	1	1	1	1	1	1	1
Klf4	0.942075		-0.086812	0.39661	0	0	0.171774	0.258839	0	0	0	0	0	0	0	0	0	0	0	0	0	0	0
Zfp553	0.942073	3.10005	-0.48187	0.10032	-1	1	0.0369794	0.0270663	-1	-1	-1	-1	-1	-1	-1	1	1	-1	1	1	1	1	1
AB056442	0.94207	NA	-0.157756	NA	-1	NA	1.24935e-09	NA	-1	-1	-1	-1	-1	-1	-1	-1	-1	-1	-1	-1	-1	-1	-1
Arvcf	0.942059	3.98202	-0.75043	0.076419	-1	0	0.0209995	0.433217	-1	-1	-1	-1	-1	-1	-1	-1	-1	-1	0	0	0	0	0
Elf3	0.942003		1.8314	-0.039056	0	0	0.163649	0.122787	0	0	0	0	0	0	0	0	0	0	0	0	0	0	0
Arhgdib	0.941987	2.17328	-0.12174	0.07585	0	1	0.316467	0.0227822	0	0	0	0	0	1	1	1	1	1	1	1	1	1	1
Samd4	0.941964	3.3208	0.98531	-0.1302	1	-1	0.023831	0.0445307	1	1	1	1	1	-1	1	1	1	1	-1	-1	-1	-1	-1
Xpc	0.941958	3.56434	-0.44217	0.07248	-1	0	0.0238524	0.406751	-1	-1	-1	-1	-1	-1	-1	-1	-1	-1	0	0	0	0	0
Ifitm6	0.941949	13.8481	0.4735	-0.24405	1	0	0.0573706	0.380837	1	1	1	1	1	1	1	1	1	1	0	0	0	0	0
Nfkb2	0.941946	2.84608	1.3015	-0.064193	1	-1	0.0288475	0.0714079	1	1	1	1	1	1	-1	-1	1	-1	-1	-1	-1	-1	-1
Ccnl1	0.941932	3.0298	0.94142	-0.086933	1	-1	0.0286276	0.037293	1	1	1	1	1	1	1	-1	-1	-1	-1	-1	-1	-1	-1
Gpsm3	0.941923	8.66865	-0.22081	0.21697	-1	0	0.0621175	0.303165	-1	-1	-1	-1	-1	-1	-1	-1	-1	-1	0	0	0	0	0
Ltb	0.941885		0.45355	0.12161	1	1	0.0839292	0.0387164	1	1	1	1	1	1	1	1	1	1	1	1	1	1	1
Fads2	0.941862	19.1479	-0.24242	0.53018	-1	0	0.0593158	0.16113	-1	-1	-1	-1	-1	-1	-1	-1	-1	-1	0	0	0	0	0
Idh3b	0.941862	NA	-0.0566077	NA	-1	NA	1.27889e-09	NA	-1	-1	-1	-1	-1	-1	-1	-1	-1	-1	-1	-1	-1	-1	-1
E2f4	0.941756	2.61765	-0.038813	0.069591	0	1	0.332452	0.0250968	0	0	0	0	0	1	1	1	1	0	1	1	1	1	1
Nsg1	0.941756	2.81097	-0.42987	0.087392	-1	1	0.0595924	0.0223902	-1	-1	-1	-1	-1	-1	1	1	1	1	1	1	1	1	1
Bmp2	0.941704		-0.2456	-0.059016	-1	-1	0.0708917	0.0453103	-1	-1	-1	-1	-1	-1	-1	-1	-1	-1	-1	-1	-1	-1	-1
Ankrd27	0.941696	3.36514	-0.41579	0.10214	-1	1	0.0355046	0.0344625	-1	-1	-1	-1	-1	-1	-1	-1	1	-1	1	1	1	1	1
Rtn1	0.941659		0.038133	-0.072202	0	0	0.198675	0.385451	0	0	0	0	0	0	0	0	0	0	0	0	0	0	0
Pea15a	0.94165	3.46623	-0.45024	0.15841	-1	1	0.0525556	0.0277128	-1	-1	-1	-1	-1	1	-1	1	-1	-1	1	1	1	1	1
Hexim2	0.941602	3.34971	-0.48201	0.06045	-1	1	0.0239924	0.0433022	-1	-1	-1	-1	-1	-1	-1	-1	-1	1	1	1	1	1	1
2610301B20Rik	0.941573	3.65767	-0.4426	0.096343	-1	0	0.0273213	0.402615	-1	-1	-1	-1	-1	-1	-1	-1	-1	-1	0	0	0	0	0
A1cf	0.941502	15.7475	-0.2104	0.20566	-1	0	0.0504531	0.256938	-1	-1	-1	-1	-1	-1	-1	-1	-1	-1	0	0	0	0	0
Aig1	0.941462	NA	0.0558546	NA	1	NA	1.33738e-09	NA	1	1	1	1	1	1	1	1	1	1	1	1	1	1	1
Bcl2	0.941438	NA	0.0547693	NA	1	NA	1.34099e-09	NA	1	1	1	1	1	1	1	1	1	1	1	1	1	1	1
Mmp9	0.941436	NA	0.219739	NA	1	NA	1.34124e-09	NA	1	1	1	1	1	1	1	1	1	1	1	1	1	1	1
Isg15	0.941372	5.49322	1.0108	-0.04606	1	0	0.0305567	0.481242	1	1	1	1	1	1	1	1	1	1	0	0	0	0	0
Btg2	0.941324	2.79518	1.8975	-0.090704	1	-1	0.0387901	0.0636024	1	1	1	1	1	-1	1	-1	-1	-1	-1	-1	-1	-1	-1
Il16	0.94132	2.87847	-0.97273	0.14431	0	1	0.161512	0.0231393	0	0	0	0	0	1	1	1	1	1	1	1	1	1	1
Abca7	0.941306	4.61239	-0.26834	0.093743	-1	0	0.0356511	0.384321	-1	-1	-1	-1	-1	-1	-1	-1	-1	-1	0	0	0	0	0
Ddah1	0.94129	NA	-0.116057	NA	-1	NA	1.36328e-09	NA	-1	-1	-1	-1	-1	-1	-1	-1	-1	-1	-1	-1	-1	-1	-1
Lpxn	0.941271	NA	0.0766769	NA	1	NA	1.36614e-09	NA	1	1	1	1	1	1	1	1	1	1	1	1	1	1	1
Pdk1	0.941251	9.1062	-0.4221	0.12425	-1	0	0.0307895	0.37368	-1	-1	-1	-1	-1	-1	-1	-1	-1	-1	0	0	0	0	0
Nelf	0.94125	4.06224	-0.36932	0.013041	-1	0	0.026037	0.481897	-1	-1	-1	-1	-1	-1	-1	-1	-1	-1	0	0	0	0	0
Gm5458	0.94122	16.2218	0.23057	-0.12653	1	0	0.0750243	0.399393	1	1	1	1	1	1	1	1	1	1	0	0	0	0	0
A330049M08Rik	0.94115	NA	-0.135809	NA	-1	NA	1.38452e-09	NA	-1	-1	-1	-1	-1	-1	-1	-1	-1	-1	-1	-1	-1	-1	-1
Il1r1	0.941111	9.13267	1.0532	-0.47134	1	0	0.0217014	0.260171	1	1	1	1	1	1	1	1	1	1	0	0	0	0	0
Dnajc5	0.941107	NA	0.0996644	NA	1	NA	1.39121e-09	NA	1	1	1	1	1	1	1	1	1	1	1	1	1	1	1
Unc5b	0.941057	2.58758	-0.50878	0.14081	-1	1	0.075872	0.0226656	-1	-1	-1	-1	-1	-1	1	1	1	1	1	1	1	1	1
4930525G20Rik	0.940982	NA	-0.0682578	NA	-1	NA	1.41059e-09	NA	-1	-1	-1	-1	-1	-1	-1	-1	-1	-1	-1	-1	-1	-1	-1
Pih1d2	0.94097	2.52628	-0.26408	0.095041	-1	1	0.0973489	0.0229478	-1	-1	-1	-1	-1	1	1	1	1	-1	1	1	1	1	1
Pqlc3	0.940968		-0.15056	0.80823	0	0	0.114317	0.162525	0	0	0	0	0	0	0	0	0	0	0	0	0	0	0
Sipa1l3	0.940926	7.38872	-0.45862	0.22992	-1	0	0.0276336	0.302549	-1	-1	-1	-1	-1	-1	-1	-1	-1	-1	0	0	0	0	0
BC014805	0.940909	0.757316	0.99883	-0.15197	0	-1	0.181089	0.0227838	0	0	0	0	0	-1	-1	-1	-1	-1	-1	-1	-1	-1	-1
Abcb1b	0.940886	11.929	0.38421	-0.21084	1	0	0.0367799	0.298206	1	1	1	1	1	1	1	1	1	1	0	0	0	0	0
Glipr2	0.940882	10.8905	0.55471	-0.21549	1	0	0.0371	0.45569	1	1	1	1	1	1	1	1	1	1	0	0	0	0	0
Zkscan1	0.940799	2.63352	-0.48234	0.057255	0	1	0.129115	0.024331	0	0	0	0	0	1	1	1	1	1	1	1	1	1	1
Evi5l	0.940796	7.01578	-0.7391	0.3114	-1	0	0.0242791	0.308846	-1	-1	-1	-1	-1	-1	-1	-1	-1	-1	0	0	0	0	0
Sgcb	0.940739	2.156	-0.1609	0.11913	0	1	0.370088	0.0234387	0	0	0	0	0	1	1	1	1	1	1	1	1	1	1
Mlst8	0.940734	2.62879	-0.74894	0.080151	-1	1	0.0305626	0.0302929	-1	-1	-1	-1	-1	-1	1	-1	1	1	1	1	1	1	1
Nr2c2ap	0.940617	2.69249	-0.42858	0.076092	-1	1	0.0360126	0.0286764	-1	-1	-1	-1	-1	-1	1	-1	-1	1	1	1	1	1	1
Cib2	0.940601	3.69512	-0.18168	-0.05227	-1	0	0.0630233	0.437746	-1	-1	-1	-1	-1	-1	-1	-1	-1	-1	0	0	0	0	0
Slx4	0.940522	3.64345	-0.15555	0.091078	-1	0	0.0772776	0.410307	-1	-1	-1	-1	-1	-1	-1	-1	-1	-1	0	0	0	0	0
Ptp4a1	0.940511	3.0784	0.82374	-0.083293	1	-1	0.0296431	0.0363558	1	1	1	1	1	-1	-1	-1	1	1	-1	-1	-1	-1	-1
Nfkbie	0.940465	2.82432	1.5924	-0.097291	1	-1	0.0364038	0.046848	1	1	1	1	1	-1	-1	-1	1	-1	-1	-1	-1	-1	-1
Agpat5	0.940407	3.79379	-0.11124	0.076566	-1	0	0.0911951	0.400619	-1	-1	-1	-1	-1	-1	-1	-1	-1	-1	0	0	0	0	0
Pram1	0.94039	3.40748	-0.36931	0.13897	-1	1	0.0692379	0.0243887	-1	-1	-1	-1	-1	-1	1	1	1	-1	1	1	1	1	1
Gpx8	0.940355	2.91076	-0.57333	0.11328	-1	1	0.0409878	0.0252738	-1	-1	-1	-1	-1	1	-1	-1	1	1	1	1	1	1	1
Amn	0.940323	NA	0.127492	NA	1	NA	1.51653e-09	NA	1	1	1	1	1	1	1	1	1	1	1	1	1	1	1
Tcf21	0.940302	5.3253	-0.81956	0.13508	-1	0	0.0222	0.409395	-1	-1	-1	-1	-1	-1	-1	-1	-1	-1	0	0	0	0	0
Sav1	0.940261	2.55936	0.71949	-0.046323	1	-1	0.0360228	0.0459311	1	1	1	1	1	-1	-1	-1	-1	1	-1	-1	-1	-1	-1
Tcfeb	0.940158	3.05329	-0.75603	0.097366	-1	1	0.0315718	0.0297759	-1	-1	-1	-1	-1	1	-1	-1	1	1	1	1	1	1	1
A530064D06Rik	0.940152		-0.080576	0.36728	0	0	0.289702	0.360598	0	0	0	0	0	0	0	0	0	0	0	0	0	0	0
Crcp	0.94015	4.69685	0.22193	0.065478	1	0	0.0692275	0.441937	1	1	1	1	1	1	1	1	1	1	0	0	0	0	0
Gpr172b	0.940068	3.20119	-0.50013	0.081672	-1	1	0.0358474	0.0265087	-1	-1	-1	-1	-1	-1	-1	1	1	1	1	1	1	1	1
Bcl3	0.940058	2.8519	1.1153	-0.083196	1	-1	0.0291425	0.0469591	1	1	1	1	1	-1	-1	1	-1	1	-1	-1	-1	-1	-1
Arl2	0.940001	2.96759	-0.41743	0.082407	-1	1	0.0416843	0.0249515	-1	-1	-1	-1	-1	1	-1	-1	1	1	1	1	1	1	1
Syne2	0.94	2.83246	0.37842	-0.068819	0	-1	0.182831	0.0219766	0	0	0	0	0	-1	-1	-1	-1	-1	-1	-1	-1	-1	-1
Oat	0.939981	NA	-0.0955116	NA	-1	NA	1.57422e-09	NA	-1	-1	-1	-1	-1	-1	-1	-1	-1	-1	-1	-1	-1	-1	-1
Rab15	0.939963	NA	0.0918846	NA	1	NA	1.57729e-09	NA	1	1	1	1	1	1	1	1	1	1	1	1	1	1	1
Irgm2	0.939951		0.76564	-0.016636	0	0	0.166695	0.147737	0	0	0	0	0	0	0	0	0	0	0	0	0	0	0
Lasp1	0.939913	2.70485	-0.33075	0.065603	0	1	0.193958	0.0215605	0	0	0	0	0	1	1	1	1	1	1	1	1	1	1
Nsg2	0.939909	NA	0.178535	NA	1	NA	1.58663e-09	NA	1	1	1	1	1	1	1	1	1	1	1	1	1	1	1
Usp53	0.93988	3.16335	0.57353	-0.053171	1	-1	0.0409993	0.0349254	1	1	1	1	1	-1	-1	-1	1	-1	-1	-1	-1	-1	-1
Zfp566	0.939876	2.53575	-0.75722	0.13173	-1	1	0.0525883	0.0233067	-1	-1	-1	-1	-1	1	1	-1	1	1	1	1	1	1	1
Lhx2	0.93983	3.35025	-0.6102	0.034847	-1	1	0.0368274	0.0626839	-1	-1	-1	-1	-1	1	1	1	1	-1	1	1	1	1	1
Arhgef6	0.939813	2.27081	-0.6759	0.099575	0	1	0.185351	0.0226318	0	0	0	0	0	1	1	1	1	1	1	1	1	1	1
Esrra	0.939804	3.58264	-0.56953	0.087159	-1	0	0.0234714	0.411269	-1	-1	-1	-1	-1	-1	-1	-1	-1	-1	0	0	0	0	0
G3bp2	0.939795	11.795	0.44994	-0.40775	1	0	0.0231965	0.168042	1	1	1	1	1	1	1	1	1	1	0	0	0	0	0
Arhgef10l	0.939725	2.62929	0.47299	-0.05358	1	-1	0.0389308	0.0279874	1	1	1	1	1	1	-1	-1	-1	-1	-1	-1	-1	-1	-1
Odf2	0.939721	4.54422	-0.18708	0.098348	-1	0	0.0574885	0.390841	-1	-1	-1	-1	-1	-1	-1	-1	-1	-1	0	0	0	0	0
Rbm43	0.939665		0.50125	0.023499	1	1	0.0516138	0.0890321	1	1	1	1	1	1	1	1	1	1	1	1	1	1	1
G6pc3	0.939645	3.44698	-0.45804	0.091971	-1	0	0.0267173	0.408252	-1	-1	-1	-1	-1	-1	-1	-1	-1	-1	0	0	0	0	0
2010002N04Rik	0.93962	2.44677	0.5252	0.053735	0	1	0.175807	0.0461061	0	0	0	0	0	1	1	1	1	1	1	1	1	1	1
Ctsf	0.939614	NA	-0.0708717	NA	-1	NA	1.63801e-09	NA	-1	-1	-1	-1	-1	-1	-1	-1	-1	-1	-1	-1	-1	-1	-1
Rtkn	0.9396		-0.077047	0.43167	0	0	0.11524	0.322259	0	0	0	0	0	0	0	0	0	0	0	0	0	0	0
Rnf19b	0.939593	2.71795	1.1269	-0.051815	1	-1	0.0386047	0.0646487	1	1	1	1	1	-1	-1	1	-1	-1	-1	-1	-1	-1	-1
Smurf1	0.939566	2.68364	-0.37014	0.067194	0	1	0.155712	0.0220085	0	0	0	0	0	1	1	1	1	1	1	1	1	1	1
Mier1	0.939554		0.099766	-0.53729	0	0	0.10766	0.155979	0	0	0	0	0	0	0	0	0	0	0	0	0	0	0
Gyg	0.939535	3.50747	-0.20335	0.078897	-1	1	0.0586866	0.0346414	-1	-1	-1	-1	-1	-1	-1	-1	-1	1	1	1	1	1	1
Ap1g2	0.939528	1.33473	-0.40511	0.073517	0	1	0.166226	0.0219766	0	0	0	0	0	1	1	1	1	1	1	1	1	1	1
Casp4	0.93951	2.95185	1.1376	0.0059829	1	0	0.0354869	0.379147	1	1	1	1	1	0	1	1	0	0	0	0	0	0	0
Hnmt	0.939451	NA	-0.123499	NA	-1	NA	1.66712e-09	NA	-1	-1	-1	-1	-1	-1	-1	-1	-1	-1	-1	-1	-1	-1	-1
Thap11	0.939425	3.10936	-0.57209	0.08486	-1	1	0.0268862	0.038567	-1	-1	-1	-1	-1	1	-1	-1	-1	-1	1	1	1	1	1
Tnfsf13b	0.939404	NA	0.0829033	NA	1	NA	1.67553e-09	NA	1	1	1	1	1	1	1	1	1	1	1	1	1	1	1
Fap	0.939365	3.63294	0.42565	0.075494	1	0	0.0497933	0.444894	1	1	1	1	1	1	1	1	1	1	0	0	0	0	0
Gm3852	0.939265	8.67945	-0.36173	0.21194	-1	0	0.0267017	0.246039	-1	-1	-1	-1	-1	-1	-1	-1	-1	-1	0	0	0	0	0
I830012O16Rik	0.939232	2.68457	0.84152	0.10772	0	1	0.211406	0.0431714	0	0	0	0	0	1	1	1	1	1	1	1	1	1	1
9430008C03Rik	0.93923	3.12141	0.7443	0.007375	1	0	0.038204	0.300522	1	1	1	1	1	1	1	0	0	0	0	0	0	0	0
Uchl1	0.939197	NA	0.129189	NA	1	NA	1.71337e-09	NA	1	1	1	1	1	1	1	1	1	1	1	1	1	1	1
Slc19a2	0.939126	2.60878	-0.91426	0.063961	-1	1	0.0376052	0.041667	-1	-1	-1	-1	-1	1	1	1	-1	1	1	1	1	1	1
Cdyl	0.939105	14.0139	-0.18679	0.35054	-1	0	0.0567533	0.167085	-1	-1	-1	-1	-1	-1	-1	-1	-1	-1	0	0	0	0	0
Fpr3	0.939094	3.61986	0.44173	0.066995	1	0	0.0463307	0.45457	1	1	1	1	1	1	1	1	1	1	0	0	0	0	0
Stx2	0.939091	3.37489	-0.58188	0.12169	-1	1	0.0318299	0.0365228	-1	-1	-1	-1	-1	-1	1	-1	-1	-1	1	1	1	1	1
Sh2d1a	0.939051	NA	0.162113	NA	1	NA	1.74032e-09	NA	1	1	1	1	1	1	1	1	1	1	1	1	1	1	1
Zdhhc12	0.939043	3.4494	-0.26489	0.077134	-1	0	0.0407213	0.409014	-1	-1	-1	-1	-1	-1	-1	-1	-1	-1	0	0	0	0	0
Ugt2b5	0.939032	NA	-0.0558327	NA	-1	NA	1.74396e-09	NA	-1	-1	-1	-1	-1	-1	-1	-1	-1	-1	-1	-1	-1	-1	-1
Ufsp1	0.939026	2.97552	-0.53239	0.091451	-1	1	0.0373793	0.026288	-1	-1	-1	-1	-1	-1	-1	1	1	1	1	1	1	1	1
Jub	0.939021	3.12169	-1.0983	0.1528	-1	1	0.0280588	0.0334183	-1	-1	-1	-1	-1	1	1	-1	-1	-1	1	1	1	1	1
Myb	0.938967	7.84137	0.45064	0.031445	1	0	0.0599139	0.495076	1	1	1	1	1	1	1	1	1	1	0	0	0	0	0
Snapc1	0.938958	NA	0.0545342	NA	1	NA	1.75772e-09	NA	1	1	1	1	1	1	1	1	1	1	1	1	1	1	1
Tm7sf2	0.938957	15.753	-0.2864	0.30324	-1	0	0.0491503	0.266882	-1	-1	-1	-1	-1	-1	-1	-1	-1	-1	0	0	0	0	0
Ddx21	0.93895	4.67025	0.30497	0.0022992	1	0	0.0322418	0.496738	1	1	1	1	1	1	1	1	1	1	0	0	0	0	0
Phf11	0.938949	3.87967	0.59997	0.088812	1	0	0.0440089	0.450576	1	1	1	1	1	1	1	1	1	1	0	0	0	0	0
Mx1	0.938915		1.4924	0.032178	0	0	0.154664	0.156142	0	0	0	0	0	0	0	0	0	0	0	0	0	0	0
Rab44	0.938914	2.70762	1.82	0.013161	1	0	0.0455745	0.317507	1	1	1	1	1	0	0	1	0	0	0	0	0	0	0
Olfr524	0.938835		0.76604	0.058802	1	1	0.059501	0.0610828	1	1	1	1	1	1	1	1	1	1	1	1	1	1	1
2210021J22Rik	0.938809	2.84685	-0.66952	0.099936	-1	1	0.0444905	0.0251383	-1	-1	-1	-1	-1	-1	1	1	1	1	1	1	1	1	1
Rnf43	0.938804	4.33228	-1.4137	0.2554	-1	0	0.0221877	0.370988	-1	-1	-1	-1	-1	-1	-1	-1	-1	-1	0	0	0	0	0
1110007C09Rik	0.938755		-0.060019	0.076045	0	0	0.155747	0.402998	0	0	0	0	0	0	0	0	0	0	0	0	0	0	0
Syde1	0.938748	3.869	-0.42783	0.12305	-1	0	0.0348994	0.401442	-1	-1	-1	-1	-1	-1	-1	-1	-1	-1	0	0	0	0	0
Icosl	0.938645	13.9455	0.36219	-0.27043	1	0	0.0460465	0.277311	1	1	1	1	1	1	1	1	1	1	0	0	0	0	0
Stk19	0.938622	2.7203	0.6944	-0.063325	1	-1	0.0388202	0.0350729	1	1	1	1	1	-1	-1	-1	-1	1	-1	-1	-1	-1	-1
Psmb9	0.93862	13.9171	0.64489	-0.6152	1	0	0.0283303	0.204894	1	1	1	1	1	1	1	1	1	1	0	0	0	0	0
Ftsj2	0.938578	2.9472	-0.65378	0.057345	-1	1	0.0389222	0.0350237	-1	-1	-1	-1	-1	1	1	1	-1	1	1	1	1	1	1
D2Ertd750e	0.938575	NA	0.0694375	NA	1	NA	1.83095e-09	NA	1	1	1	1	1	1	1	1	1	1	1	1	1	1	1
Rab3a	0.938542	2.88256	-1.2617	0.13803	-1	1	0.0389915	0.0299856	-1	-1	-1	-1	-1	-1	1	1	1	1	1	1	1	1	1
Zfp647	0.938529	3.03416	-1.3389	0.18861	-1	1	0.0286945	0.0326986	-1	-1	-1	-1	-1	-1	-1	-1	1	1	1	1	1	1	1
Pld2	0.938519	3.5018	-0.47526	0.12673	-1	1	0.038194	0.034395	-1	-1	-1	-1	-1	1	-1	-1	-1	-1	1	1	1	1	1
Kcnj8	0.938494	12.542	-0.88962	1.0537	-1	0	0.0309477	0.185592	-1	-1	-1	-1	-1	-1	-1	-1	-1	-1	0	0	0	0	0
Trps1	0.938467	2.03289	1.3067	-0.039345	0	-1	0.12719	0.0632247	0	0	0	0	0	-1	-1	-1	-1	-1	-1	-1	-1	-1	-1
2610507I01Rik	0.938416	2.77117	-0.7568	0.059147	0	1	0.112265	0.0361474	0	0	0	0	0	1	1	1	1	1	1	1	1	1	1
Ltb4r1	0.938407	NA	0.0822891	NA	1	NA	1.86399e-09	NA	1	1	1	1	1	1	1	1	1	1	1	1	1	1	1
Ifit2	0.93839	3.93406	1.6122	-0.068776	1	0	0.0256848	0.482742	1	1	1	1	1	1	1	1	1	1	0	0	0	0	0
Rufy2	0.938373	13.5193	-0.35859	0.47935	-1	0	0.0291611	0.324621	-1	-1	-1	-1	-1	-1	-1	-1	-1	-1	0	0	0	0	0
Fanci	0.93835	NA	0.167897	NA	1	NA	1.87527e-09	NA	1	1	1	1	1	1	1	1	1	1	1	1	1	1	1
Plekha4	0.938334	3.46266	0.54913	0.036903	1	0	0.0341852	0.475443	1	1	1	1	1	1	1	1	1	1	0	0	0	0	0
Rad18	0.938319	NA	0.0653878	NA	1	NA	1.88132e-09	NA	1	1	1	1	1	1	1	1	1	1	1	1	1	1	1
Sult1a1	0.938315	12.5365	0.13667	-0.25252	1	0	0.0798221	0.267704	1	1	1	1	1	1	1	1	1	1	0	0	0	0	0
Ptpn18	0.938303	3.88057	-0.3414	0.11793	-1	0	0.0406851	0.454405	-1	-1	-1	-1	-1	-1	-1	-1	-1	-1	0	0	0	0	0
Spryd3	0.938302	4.48151	-0.28854	0.090202	-1	0	0.0336424	0.362418	-1	-1	-1	-1	-1	-1	-1	-1	-1	-1	0	0	0	0	0
Tmem107	0.938292	2.69405	-0.21475	0.087814	0	1	0.111856	0.023449	0	0	0	0	0	1	1	1	1	0	1	1	1	1	1
Apbb3	0.938285	3.10704	0.4978	-0.042579	1	-1	0.029851	0.0422453	1	1	1	1	1	-1	1	1	-1	-1	-1	-1	-1	-1	-1
Dhx58	0.938285	12.9679	0.25142	-0.06002	1	0	0.0682816	0.456783	1	1	1	1	1	1	1	1	1	1	0	0	0	0	0
Trim30d	0.938221	6.19194	0.76074	-0.065073	1	0	0.0321917	0.466624	1	1	1	1	1	1	1	1	1	1	0	0	0	0	0
Qdpr	0.938123	17.7085	-0.22694	0.22389	-1	0	0.0796148	0.326912	-1	-1	-1	-1	-1	-1	-1	-1	-1	-1	0	0	0	0	0
AI317395	0.93808	7.42049	-0.16578	-0.038425	-1	0	0.0800284	0.455325	-1	-1	-1	-1	-1	-1	-1	-1	-1	-1	0	0	0	0	0
Klra15	0.93797	NA	0.158309	NA	1	NA	1.95183e-09	NA	1	1	1	1	1	1	1	1	1	1	1	1	1	1	1
Plekhf1	0.937969	9.054	0.46358	-0.27604	1	0	0.0242958	0.211273	1	1	1	1	1	1	1	1	1	1	0	0	0	0	0
Cdca7	0.937954		-0.038759	0.1816	0	0	0.237455	0.32037	0	0	0	0	0	0	0	0	0	0	0	0	0	0	0
Crtc1	0.937888	3.56918	-0.54356	0.08446	-1	0	0.0241468	0.386808	-1	-1	-1	-1	-1	-1	-1	-1	-1	-1	0	0	0	0	0
Trim13	0.937875	2.73564	-0.48778	0.077728	0	1	0.145287	0.0231242	0	0	0	0	0	1	1	1	1	1	1	1	1	1	1
Il15ra	0.937873	2.45601	0.59972	-0.04984	0	-1	0.113605	0.0317795	0	0	0	0	0	-1	-1	-1	-1	-1	-1	-1	-1	-1	-1
Ccrl2	0.937863	3.04494	1.9882	-0.16201	1	-1	0.0236788	0.0613316	1	1	1	1	1	-1	1	1	1	1	-1	-1	-1	-1	-1
Cnn2	0.937862	2.85337	-0.22517	0.10737	-1	1	0.0968922	0.0295171	-1	-1	-1	-1	-1	-1	1	-1	-1	1	1	1	1	1	1
2010109K11Rik	0.937795	NA	0.0902556	NA	1	NA	1.98811e-09	NA	1	1	1	1	1	1	1	1	1	1	1	1	1	1	1
Rhoc	0.937785	4.45222	0.45556	0.043946	1	0	0.0428973	0.471799	1	1	1	1	1	1	1	1	1	1	0	0	0	0	0
Tor3a	0.937774	5.05176	0.28003	0.045149	1	0	0.0550484	0.447121	1	1	1	1	1	1	1	1	1	1	0	0	0	0	0
Cyc1	0.937748	5.53509	-0.1532	-0.038306	-1	0	0.0782572	0.447877	-1	-1	-1	-1	-1	-1	-1	-1	-1	-1	0	0	0	0	0
Tmem119	0.937741	3.14803	-0.35481	0.18429	-1	1	0.0894171	0.0377959	-1	-1	-1	-1	-1	-1	1	-1	-1	-1	1	1	1	1	1
Fam53b	0.93768	3.70694	-0.4706	0.10097	-1	0	0.0268049	0.38036	-1	-1	-1	-1	-1	-1	-1	-1	-1	-1	0	0	0	0	0
Hn1	0.937648		-0.072974	0.078871	0	0	0.118787	0.371111	0	0	0	0	0	0	0	0	0	0	0	0	0	0	0
Sc5d	0.937513	13.1366	-0.47224	0.37503	-1	0	0.0296597	0.219045	-1	-1	-1	-1	-1	-1	-1	-1	-1	-1	0	0	0	0	0
Accn5	0.937492	NA	-0.0702822	NA	-1	NA	2.05223e-09	NA	-1	-1	-1	-1	-1	-1	-1	-1	-1	-1	-1	-1	-1	-1	-1
Smc2	0.937482	2.34903	-0.47339	0.1138	0	1	0.191637	0.0219979	0	0	0	0	0	1	1	1	1	1	1	1	1	1	1
Pvrl3	0.937477	NA	-0.0559727	NA	-1	NA	2.05543e-09	NA	-1	-1	-1	-1	-1	-1	-1	-1	-1	-1	-1	-1	-1	-1	-1
Sybu	0.937464	3.41768	0.63387	-0.072411	1	-1	0.0297204	0.0362478	1	1	1	1	1	-1	-1	-1	1	1	-1	-1	-1	-1	-1
Zfp637	0.93743	2.88812	-0.58359	0.051084	-1	1	0.0386897	0.0348846	-1	-1	-1	-1	-1	1	1	1	-1	1	1	1	1	1	1
Gm7166	0.93742	NA	0.0991775	NA	1	NA	2.06769e-09	NA	1	1	1	1	1	1	1	1	1	1	1	1	1	1	1
Tagln	0.937323	3.42857	0.38023	0.011248	1	0	0.0318712	0.487837	1	1	1	1	1	1	1	1	1	1	0	0	0	0	0
Ier3	0.937258	3.25549	2.5818	-0.12469	1	-1	0.0283933	0.0896034	1	1	1	1	1	1	1	1	-1	-1	-1	-1	-1	-1	-1
Fam58b	0.937237	2.80859	-0.47622	0.056335	-1	1	0.0401411	0.0286713	-1	-1	-1	-1	-1	1	1	1	1	-1	1	1	1	1	1
Samd1	0.937228	2.85674	-0.68808	0.14429	-1	1	0.0398839	0.0289943	-1	-1	-1	-1	-1	-1	-1	1	1	-1	1	1	1	1	1
Rnd3	0.937227	2.69227	1.1816	-0.10239	0	-1	0.134135	0.0316407	0	0	0	0	0	-1	-1	-1	-1	-1	-1	-1	-1	-1	-1
Efhd2	0.937211	13.138	0.38473	-0.29705	1	0	0.0319132	0.256777	1	1	1	1	1	1	1	1	1	1	0	0	0	0	0
Batf2	0.937198	2.60174	1.8758	-0.032161	1	0	0.0312658	0.174269	1	1	1	1	1	1	0	1	0	0	0	0	0	0	0
Mcpt8	0.937148	NA	0.116659	NA	1	NA	2.12697e-09	NA	1	1	1	1	1	1	1	1	1	1	1	1	1	1	1
Wdr92	0.937135	3.14505	0.60635	0.012017	1	0	0.0384853	0.202555	1	1	1	1	1	1	1	0	0	0	0	0	0	0	0
Cldn5	0.937132	3.06978	-1.2509	0.1918	-1	1	0.0275311	0.0406985	-1	-1	-1	-1	-1	-1	-1	-1	-1	1	1	1	1	1	1
Ces1f	0.93712	NA	-0.197735	NA	-1	NA	2.13335e-09	NA	-1	-1	-1	-1	-1	-1	-1	-1	-1	-1	-1	-1	-1	-1	-1
Tmem216	0.937073	11.462	-0.28787	0.29434	-1	0	0.0334085	0.376179	-1	-1	-1	-1	-1	-1	-1	-1	-1	-1	0	0	0	0	0
Btbd6	0.937056	3.24185	-0.51212	0.044903	-1	0	0.0218876	0.423827	-1	-1	-1	-1	-1	-1	-1	-1	-1	-1	0	0	0	0	0
Slc7a7	0.937035	3.09786	0.73065	-0.068565	1	-1	0.0414045	0.0350918	1	1	1	1	1	-1	-1	-1	-1	1	-1	-1	-1	-1	-1
Slc6a12	0.937034	16.3809	-0.21288	0.25422	-1	0	0.0471365	0.253186	-1	-1	-1	-1	-1	-1	-1	-1	-1	-1	0	0	0	0	0
Ilf3	0.937027	3.65348	-0.18459	0.087148	-1	0	0.063882	0.40124	-1	-1	-1	-1	-1	-1	-1	-1	-1	-1	0	0	0	0	0
Lamc1	0.937011	11.4658	-0.27859	0.31155	-1	0	0.0409108	0.180352	-1	-1	-1	-1	-1	-1	-1	-1	-1	-1	0	0	0	0	0
Proz	0.937009		-0.18154	-0.040431	-1	-1	0.0693984	0.0477877	-1	-1	-1	-1	-1	-1	-1	-1	-1	-1	-1	-1	-1	-1	-1
Chsy1	0.936935	17.9098	-0.44968	1.3774	-1	0	0.0353981	0.226695	-1	-1	-1	-1	-1	-1	-1	-1	-1	-1	0	0	0	0	0
Arhgap39	0.936902	2.61692	-0.58206	0.093946	-1	1	0.0496792	0.0244804	-1	-1	-1	-1	-1	1	-1	1	1	1	1	1	1	1	1
Klkb1	0.936856	NA	-0.109814	NA	-1	NA	2.19241e-09	NA	-1	-1	-1	-1	-1	-1	-1	-1	-1	-1	-1	-1	-1	-1	-1
Map4k4	0.936797		-0.11844	0.3445	0	0	0.129339	0.270716	0	0	0	0	0	0	0	0	0	0	0	0	0	0	0
Plcg2	0.936756	5.28717	-0.28136	0.14748	-1	0	0.0527662	0.36251	-1	-1	-1	-1	-1	-1	-1	-1	-1	-1	0	0	0	0	0
Sirpb1a	0.936721	NA	0.102846	NA	1	NA	2.22326e-09	NA	1	1	1	1	1	1	1	1	1	1	1	1	1	1	1
Fstl3	0.936686	NA	0.125779	NA	1	NA	2.23128e-09	NA	1	1	1	1	1	1	1	1	1	1	1	1	1	1	1
Lipo1	0.936672	1.44788	-0.35044	0.066974	0	1	0.197884	0.0229643	0	0	0	0	0	1	1	1	1	1	1	1	1	1	1
Zwilch	0.936604	2.20819	-0.37502	0.11939	0	1	0.262308	0.0228295	0	0	0	0	0	1	1	1	1	1	1	1	1	1	1
Iqce	0.936477	3.2071	-0.79899	0.14747	-1	1	0.0298315	0.0399148	-1	-1	-1	-1	-1	-1	-1	-1	-1	1	1	1	1	1	1
Rwdd3	0.936434	3.85141	-0.3684	-0.0081025	-1	0	0.0315375	0.491268	-1	-1	-1	-1	-1	-1	-1	-1	-1	-1	0	0	0	0	0
Naa20	0.936434	20.834	0.12426	-0.34309	1	0	0.0800008	0.188587	1	1	1	1	1	1	1	1	1	1	0	0	0	0	0
Spn	0.936403	NA	0.1382	NA	1	NA	2.29713e-09	NA	1	1	1	1	1	1	1	1	1	1	1	1	1	1	1
Obfc1	0.936403	2.9597	0.4994	-0.035007	1	-1	0.037573	0.0455104	1	1	1	1	1	1	-1	-1	-1	-1	-1	-1	-1	-1	-1
Rad51ap1	0.936398		-0.17914	0.54027	0	0	0.150944	0.301478	0	0	0	0	0	0	0	0	0	0	0	0	0	0	0
Thtpa	0.93634	3.28585	-0.51516	0.059707	-1	0	0.0222979	0.435577	-1	-1	-1	-1	-1	-1	-1	-1	-1	-1	0	0	0	0	0
Crybb3	0.936304	2.46647	1.7398	0.12857	0	1	0.188567	0.0574126	0	0	0	0	0	1	1	1	1	1	1	1	1	1	1
Plk3	0.936265	2.72479	1.3431	-0.10413	1	-1	0.0369914	0.0378778	1	1	1	1	1	-1	-1	-1	-1	1	-1	-1	-1	-1	-1
Abat	0.93626	NA	-0.0778804	NA	-1	NA	2.33093e-09	NA	-1	-1	-1	-1	-1	-1	-1	-1	-1	-1	-1	-1	-1	-1	-1
Gbp4	0.936249	9.71744	1.537	-0.74482	1	0	0.023418	0.281442	1	1	1	1	1	1	1	1	1	1	0	0	0	0	0
Gm6337	0.936222		0.55798	0.083622	1	1	0.0567373	0.0548147	1	1	1	1	1	1	1	1	1	1	1	1	1	1	1
Glis2	0.936197	2.08402	-0.72781	0.10029	0	1	0.182278	0.0227969	0	0	0	0	0	1	1	1	1	1	1	1	1	1	1
Nrg4	0.936186	15.3131	0.52861	-0.59281	1	0	0.0358253	0.195301	1	1	1	1	1	1	1	1	1	1	0	0	0	0	0
Dnmt1	0.936159	2.63677	-0.1913	0.07922	0	1	0.120412	0.0241012	0	0	0	0	0	1	0	1	1	1	1	1	1	1	1
Slc46a1	0.936097	2.66367	-0.19131	-0.041345	0	-1	0.307227	0.0361347	0	0	0	0	0	-1	-1	-1	-1	-1	-1	-1	-1	-1	-1
Plcd3	0.936092	1.37468	-0.43292	0.089263	0	1	0.244941	0.0228918	0	0	0	0	0	1	1	1	1	1	1	1	1	1	1
Oas1c	0.936069	2.52993	-0.10604	0.078955	0	1	0.198773	0.0253058	0	0	0	0	0	1	1	1	1	0	1	1	1	1	1
Syce2	0.936045	NA	0.0997438	NA	1	NA	2.38286e-09	NA	1	1	1	1	1	1	1	1	1	1	1	1	1	1	1
1110054O05Rik	0.936042	12.4881	-0.30037	0.40056	-1	0	0.0434696	0.164244	-1	-1	-1	-1	-1	-1	-1	-1	-1	-1	0	0	0	0	0
Adcyap1r1	0.936028	2.79095	-1.1564	0.1249	-1	1	0.0388042	0.0312291	-1	-1	-1	-1	-1	1	1	-1	1	1	1	1	1	1	1
Nphp3	0.936013	3.21306	-0.43532	0.079409	-1	1	0.0329761	0.0300053	-1	-1	-1	-1	-1	1	1	-1	-1	-1	1	1	1	1	1
Aff1	0.936011	3.61614	0.42289	-0.038103	1	0	0.0220496	0.439905	1	1	1	1	1	1	1	1	1	1	0	0	0	0	0
Cd24a	0.936005	3.65548	0.56456	0.0092564	1	0	0.0276168	0.491415	1	1	1	1	1	1	1	1	1	1	0	0	0	0	0
Papss1	0.935949	3.78502	-0.3389	0.080116	-1	0	0.0309087	0.397029	-1	-1	-1	-1	-1	-1	-1	-1	-1	-1	0	0	0	0	0
Rbm12b	0.935911	2.46951	-0.80932	0.13055	0	1	0.15511	0.0232473	0	0	0	0	0	1	1	1	1	1	1	1	1	1	1
Dusp5	0.935911		1.2968	0.0224	0	0	0.100516	0.158643	0	0	0	0	0	0	0	0	0	0	0	0	0	0	0
Mlkl	0.935859	12.0675	0.83647	-0.57963	1	0	0.0272816	0.252004	1	1	1	1	1	1	1	1	1	1	0	0	0	0	0
Ept1	0.935857		-0.5206	-0.006529	0	0	0.11026	0.220154	0	0	0	0	0	0	0	0	0	0	0	0	0	0	0
Lgals3	0.935854	NA	0.139634	NA	1	NA	2.42965e-09	NA	1	1	1	1	1	1	1	1	1	1	1	1	1	1	1
Cby1	0.935846	2.85057	-0.49931	0.06391	-1	1	0.0335291	0.0297481	-1	-1	-1	-1	-1	-1	-1	1	1	1	1	1	1	1	1
Bckdk	0.935844	2.90025	-0.6883	0.10783	-1	1	0.0361192	0.0278361	-1	-1	-1	-1	-1	-1	-1	1	1	1	1	1	1	1	1
Fam50b	0.935842	3.34758	0.54467	-0.17167	1	-1	0.0482964	0.0360748	1	1	1	1	1	1	1	1	-1	1	-1	-1	-1	-1	-1
Alad	0.935789		-0.1889	-0.046282	-1	-1	0.0676796	0.0658998	-1	-1	-1	-1	-1	-1	-1	-1	-1	-1	-1	-1	-1	-1	-1
Flrt1	0.935779	3.92031	-0.9804	0.18153	-1	0	0.0252118	0.400758	-1	-1	-1	-1	-1	-1	-1	-1	-1	-1	0	0	0	0	0
Abcd2	0.935734	NA	-0.109483	NA	-1	NA	2.4595e-09	NA	-1	-1	-1	-1	-1	-1	-1	-1	-1	-1	-1	-1	-1	-1	-1
6330503K22Rik	0.93572	22.694	0.016121	0.72462	0	1	0.363422	0.0916447	0	0	0	0	0	0	0	0	0	0	1	1	1	1	1
Selm	0.935712	10.4239	-0.29008	0.2716	-1	0	0.0368503	0.250236	-1	-1	-1	-1	-1	-1	-1	-1	-1	-1	0	0	0	0	0
Abca8a	0.935708	NA	-0.130135	NA	-1	NA	2.46592e-09	NA	-1	-1	-1	-1	-1	-1	-1	-1	-1	-1	-1	-1	-1	-1	-1
Cst7	0.935699	2.85009	0.69148	0.12871	0	1	0.273861	0.0384391	0	0	0	0	0	1	1	1	1	1	1	1	1	1	1
Adar	0.93569	4.9756	0.31904	0.00025949	1	0	0.0349097	0.499706	1	1	1	1	1	1	1	1	1	1	0	0	0	0	0
Trak2	0.935664	2.87792	0.60421	-0.052565	1	-1	0.0382309	0.0371915	1	1	1	1	1	-1	1	-1	-1	-1	-1	-1	-1	-1	-1
Isyna1	0.935617	NA	0.144535	NA	1	NA	2.48881e-09	NA	1	1	1	1	1	1	1	1	1	1	1	1	1	1	1
Ormdl3	0.935606	3.98393	-0.43723	0.057711	-1	0	0.022384	0.416598	-1	-1	-1	-1	-1	-1	-1	-1	-1	-1	0	0	0	0	0
Tmem186	0.935599	4.74064	-0.47192	0.1247	-1	0	0.0268364	0.375254	-1	-1	-1	-1	-1	-1	-1	-1	-1	-1	0	0	0	0	0
Mks1	0.935593	3.09217	-0.63856	0.1279	-1	1	0.0431447	0.025908	-1	-1	-1	-1	-1	-1	1	1	1	-1	1	1	1	1	1
5430403G16Rik	0.935556	6.21952	-0.53922	0.20339	-1	0	0.0281404	0.325876	-1	-1	-1	-1	-1	-1	-1	-1	-1	-1	0	0	0	0	0
Ifi35	0.935535	5.02602	0.23539	0.030864	1	0	0.0517669	0.454112	1	1	1	1	1	1	1	1	1	1	0	0	0	0	0
Fbxw17	0.935503		-0.1141	0.32701	0	0	0.125337	0.21438	0	0	0	0	0	0	0	0	0	0	0	0	0	0	0
Tmco5	0.935491	3.44251	0.49666	-0.036991	1	-1	0.0241596	0.0786913	1	1	1	1	1	1	1	1	-1	1	-1	-1	-1	-1	-1
9930105H17Rik	0.935439	12.6198	0.33855	-0.13613	1	0	0.055777	0.392091	1	1	1	1	1	1	1	1	1	1	0	0	0	0	0
Chtf18	0.935429	1.62902	-0.50474	0.16944	0	1	0.28605	0.0238132	0	0	0	0	0	1	1	1	1	1	1	1	1	1	1
Gckr	0.935422	NA	-0.0566923	NA	-1	NA	2.53843e-09	NA	-1	-1	-1	-1	-1	-1	-1	-1	-1	-1	-1	-1	-1	-1	-1
4930444A02Rik	0.935417	3.89892	-0.39367	0.094267	-1	0	0.0286713	0.398881	-1	-1	-1	-1	-1	-1	-1	-1	-1	-1	0	0	0	0	0
Rnf31	0.93537	3.1463	0.44252	0.0045301	1	0	0.048446	0.288288	1	1	1	1	1	1	0	0	0	0	0	0	0	0	0
Trim32	0.935315	3.31497	-0.50903	0.095949	-1	1	0.0309447	0.037263	-1	-1	-1	-1	-1	-1	-1	-1	-1	1	1	1	1	1	1
Igsf8	0.935306		-0.083869	0.23347	0	0	0.191097	0.445871	0	0	0	0	0	0	0	0	0	0	0	0	0	0	0
Lat	0.935264	NA	0.12117	NA	1	NA	2.57941e-09	NA	1	1	1	1	1	1	1	1	1	1	1	1	1	1	1
Trim30a	0.935245	2.59278	0.80922	0.060169	0	1	0.190661	0.0628881	0	0	0	0	0	1	1	1	1	1	1	1	1	1	1
Ralgds	0.93519	3.23684	1.5931	-0.11801	1	-1	0.0248737	0.0705917	1	1	1	1	1	-1	1	1	1	1	-1	-1	-1	-1	-1
Cyp2b10	0.935163		0.10318	-0.53285	0	0	0.153547	0.217121	0	0	0	0	0	0	0	0	0	0	0	0	0	0	0
Rapgef3	0.935159	2.52367	-1.4804	0.18608	-1	1	0.0437822	0.0267621	-1	-1	-1	-1	-1	1	1	-1	1	1	1	1	1	1	1
Insrr	0.935105	5.49428	0.90729	0.010725	1	0	0.0395629	0.498728	1	1	1	1	1	1	1	1	1	1	0	0	0	0	0
Scd1	0.935091	15.8826	-0.39834	0.34751	-1	0	0.0686791	0.33125	-1	-1	-1	-1	-1	-1	-1	-1	-1	-1	0	0	0	0	0
Fkbpl	0.935023	4.35736	-0.24309	0.092248	-1	0	0.0456953	0.369314	-1	-1	-1	-1	-1	-1	-1	-1	-1	-1	0	0	0	0	0
Myl9	0.935013		-0.21848	-0.07814	-1	-1	0.0978477	0.0430466	-1	-1	-1	-1	-1	-1	-1	-1	-1	-1	-1	-1	-1	-1	-1
Chic2	0.935009	13.5255	0.27812	-0.23182	1	0	0.0375972	0.244634	1	1	1	1	1	1	1	1	1	1	0	0	0	0	0
Frzb	0.934981	3.6139	-0.2449	0.13335	-1	0	0.0774694	0.389984	-1	-1	-1	-1	-1	-1	-1	-1	-1	-1	0	0	0	0	0
Slc7a5	0.93495	NA	0.0809171	NA	1	NA	2.66205e-09	NA	1	1	1	1	1	1	1	1	1	1	1	1	1	1	1
2310016C08Rik	0.934931	2.74641	0.85398	0.094876	0	1	0.208183	0.0486318	0	0	0	0	0	1	1	1	1	1	1	1	1	1	1
Lbh	0.934915	3.47957	-0.62218	0.12611	-1	1	0.0319598	0.036932	-1	-1	-1	-1	-1	-1	-1	1	-1	-1	1	1	1	1	1
Clec4f	0.934913	23.2977	-0.26802	2.6012	-1	1	0.0992002	0.0827079	-1	-1	-1	-1	-1	-1	-1	-1	-1	-1	1	1	1	1	1
Pdia6	0.934894	1.04697	-0.44403	0.06522	0	1	0.135078	0.0236665	0	0	0	0	0	1	1	1	1	1	1	1	1	1	1
Ptpn2	0.934834	2.95963	0.93348	-0.059564	1	-1	0.0297925	0.0575872	1	1	1	1	1	-1	-1	1	1	-1	-1	-1	-1	-1	-1
B230217C12Rik	0.93482	3.69404	-0.47952	0.2332	-1	0	0.0641832	0.395541	-1	-1	-1	-1	-1	-1	-1	-1	-1	-1	0	0	0	0	0
Ankrd37	0.9347		0.9257	0.035596	0	0	0.155543	0.100464	0	0	0	0	0	0	0	0	0	0	0	0	0	0	0
Tnfrsf23	0.934698	3.00582	1.3105	-0.034291	1	0	0.0266526	0.188468	1	1	1	1	1	1	1	1	1	0	0	0	0	0	0
Cd44	0.934664	13.537	0.60237	-0.56031	1	0	0.028584	0.19374	1	1	1	1	1	1	1	1	1	1	0	0	0	0	0
Ccr7	0.934633		0.14936	-1.1921	0	0	0.145653	0.119502	0	0	0	0	0	0	0	0	0	0	0	0	0	0	0
Lyrm2	0.934573	2.63072	-0.53344	0.08065	-1	1	0.0330991	0.0316846	-1	-1	-1	-1	-1	-1	1	-1	1	-1	1	1	1	1	1
N4bp3	0.934526	3.38903	-0.59843	0.13612	-1	1	0.0429883	0.0264713	-1	-1	-1	-1	-1	1	1	1	-1	-1	1	1	1	1	1
Ppard	0.934513	7.5788	-0.67363	0.21534	-1	0	0.0228001	0.324381	-1	-1	-1	-1	-1	-1	-1	-1	-1	-1	0	0	0	0	0
Kank3	0.934509	10.865	-0.63191	0.52575	-1	0	0.0254838	0.210382	-1	-1	-1	-1	-1	-1	-1	-1	-1	-1	0	0	0	0	0
Hmgb2	0.934506		-0.12234	0.14405	0	0	0.151664	0.399548	0	0	0	0	0	0	0	0	0	0	0	0	0	0	0
Rdh16	0.934504	NA	-0.179114	NA	-1	NA	2.78356e-09	NA	-1	-1	-1	-1	-1	-1	-1	-1	-1	-1	-1	-1	-1	-1	-1
Pip4k2b	0.93437	2.86923	-0.82075	0.094933	-1	1	0.028081	0.0368469	-1	-1	-1	-1	-1	-1	-1	1	1	-1	1	1	1	1	1
Creb3l2	0.934369	2.53187	0.75694	-0.0040425	1	0	0.0424374	0.349234	1	1	1	1	1	0	0	1	0	0	0	0	0	0	0
2310008H04Rik	0.934361	NA	0.0699793	NA	1	NA	2.82333e-09	NA	1	1	1	1	1	1	1	1	1	1	1	1	1	1	1
Sco2	0.934303	16.508	-0.1566	0.1091	-1	0	0.0795466	0.396109	-1	-1	-1	-1	-1	-1	-1	-1	-1	-1	0	0	0	0	0
Pfkfb3	0.9343	2.72464	2.0581	-0.1181	1	-1	0.0295416	0.0631034	1	1	1	1	1	1	-1	-1	1	-1	-1	-1	-1	-1	-1
Lrrcc1	0.934281	2.89387	-0.51585	0.090799	-1	1	0.0328946	0.0391308	-1	-1	-1	-1	-1	-1	-1	-1	-1	1	1	1	1	1	1
Rad54l	0.934278		-0.059367	0.20964	0	0	0.326313	0.392252	0	0	0	0	0	0	0	0	0	0	0	0	0	0	0
Fam55c	0.934238	14.9793	-0.21831	0.4454	-1	0	0.0469777	0.168853	-1	-1	-1	-1	-1	-1	-1	-1	-1	-1	0	0	0	0	0
Cx3cl1	0.934152	3.31604	0.77488	-0.046439	0	-1	0.169376	0.0582449	0	0	0	0	0	-1	-1	-1	-1	-1	-1	-1	-1	-1	-1
Zfp322a	0.93415	3.35063	-0.34062	0.067359	-1	1	0.0566623	0.0245937	-1	-1	-1	-1	-1	-1	1	1	1	1	1	1	1	1	1
1700025G04Rik	0.934147	10.958	-0.56482	0.47526	-1	0	0.0265042	0.213688	-1	-1	-1	-1	-1	-1	-1	-1	-1	-1	0	0	0	0	0
Ccl3	0.934097		2.1044	-0.05749	0	0	0.150924	0.111413	0	0	0	0	0	0	0	0	0	0	0	0	0	0	0
Dtx2	0.934091	4.1246	-0.24947	0.10775	-1	0	0.0541508	0.408018	-1	-1	-1	-1	-1	-1	-1	-1	-1	-1	0	0	0	0	0
Trim47	0.934073	3.95382	0.44351	0.042404	1	0	0.0403216	0.467103	1	1	1	1	1	1	1	1	1	1	0	0	0	0	0
Gstt3	0.934054	NA	-0.12398	NA	-1	NA	2.91076e-09	NA	-1	-1	-1	-1	-1	-1	-1	-1	-1	-1	-1	-1	-1	-1	-1
C2cd2	0.934037		-0.27706	-0.031901	-1	-1	0.0533941	0.0700325	-1	-1	-1	-1	-1	-1	-1	-1	-1	-1	-1	-1	-1	-1	-1
Pdp1	0.934009	2.64756	-0.26702	0.088952	0	1	0.284338	0.0228557	0	0	0	0	0	1	1	1	1	1	1	1	1	1	1
Stbd1	0.9339	2.9251	-0.67487	0.1182	-1	1	0.0511208	0.0250004	-1	-1	-1	-1	-1	-1	1	1	1	1	1	1	1	1	1
Fos	0.933897	2.67533	2.0888	-0.084099	0	-1	0.136358	0.0685262	0	0	0	0	0	-1	-1	-1	-1	-1	-1	-1	-1	-1	-1
Tlr6	0.933874	NA	0.114817	NA	1	NA	2.96284e-09	NA	1	1	1	1	1	1	1	1	1	1	1	1	1	1	1
Nhlrc3	0.93384	NA	0.0621496	NA	1	NA	2.97298e-09	NA	1	1	1	1	1	1	1	1	1	1	1	1	1	1	1
Zfp36l1	0.933832	2.88281	0.41915	-0.071423	1	-1	0.0506849	0.0251344	1	1	1	1	1	1	-1	-1	-1	-1	-1	-1	-1	-1	-1
Rgs19	0.93383	2.7342	-0.48276	0.14088	-1	1	0.0867058	0.0241486	-1	-1	-1	-1	-1	1	1	1	1	-1	1	1	1	1	1
Jak2	0.933812	3.58801	0.58397	-0.063492	1	-1	0.0251582	0.0550748	1	1	1	1	1	-1	1	1	1	1	-1	-1	-1	-1	-1
BC068157	0.933803	2.71365	-1.4585	0.15372	-1	1	0.0278021	0.0380798	-1	-1	-1	-1	-1	-1	1	-1	1	-1	1	1	1	1	1
Cyp2c55	0.933753	NA	-0.120966	NA	-1	NA	2.99868e-09	NA	-1	-1	-1	-1	-1	-1	-1	-1	-1	-1	-1	-1	-1	-1	-1
Strada	0.933713	2.62961	-0.76495	0.13532	-1	1	0.0534181	0.0247137	-1	-1	-1	-1	-1	-1	1	1	1	1	1	1	1	1	1
Mbl2	0.933696	1.43032	0.22861	-0.083781	0	-1	0.341715	0.0244898	0	0	0	0	0	-1	-1	-1	-1	-1	-1	-1	-1	-1	-1
P2ry10	0.933695	1.86992	0.54439	0.058188	0	1	0.226397	0.0435063	0	0	0	0	0	1	1	1	1	1	1	1	1	1	1
Slc11a2	0.933676	3.03305	0.63743	-0.031411	1	-1	0.0419536	0.0669906	1	1	1	1	1	-1	-1	-1	-1	1	-1	-1	-1	-1	-1
Prickle1	0.933659		0.057108	-0.49993	0	0	0.201214	0.148984	0	0	0	0	0	0	0	0	0	0	0	0	0	0	0
Arhgap9	0.933653	16.7174	-0.52864	1.3651	-1	0	0.0434998	0.286592	-1	-1	-1	-1	-1	-1	-1	-1	-1	-1	0	0	0	0	0
1110049F12Rik	0.933623	2.74019	-0.57377	0.03407	-1	1	0.0302069	0.0602321	-1	-1	-1	-1	-1	1	-1	1	-1	1	1	1	1	1	1
Dok1	0.933556	3.25879	-0.37346	0.11655	-1	1	0.0525581	0.0285917	-1	-1	-1	-1	-1	-1	1	1	-1	-1	1	1	1	1	1
Spsb2	0.933552	2.50113	-0.8541	0.072145	-1	1	0.0386513	0.0346058	-1	-1	-1	-1	-1	1	-1	1	1	1	1	1	1	1	1
Spc24	0.933532		-0.34982	-0.056986	-1	-1	0.0526382	0.0768113	-1	-1	-1	-1	-1	-1	-1	-1	-1	-1	-1	-1	-1	-1	-1
Cyp39a1	0.933512	NA	-0.0930742	NA	-1	NA	3.07038e-09	NA	-1	-1	-1	-1	-1	-1	-1	-1	-1	-1	-1	-1	-1	-1	-1
Bach1	0.93349	2.68387	0.84938	-0.062187	1	-1	0.0262642	0.0503273	1	1	1	1	1	1	-1	1	1	-1	-1	-1	-1	-1	-1
Agxt2l1	0.933456	NA	-0.144122	NA	-1	NA	3.08727e-09	NA	-1	-1	-1	-1	-1	-1	-1	-1	-1	-1	-1	-1	-1	-1	-1
Slc13a4	0.933444	2.90731	1.3351	-0.13372	1	-1	0.0316626	0.0381093	1	1	1	1	1	-1	-1	1	-1	1	-1	-1	-1	-1	-1
Dnajb1	0.933408	3.68325	-0.28151	0.095544	-1	0	0.0441953	0.467468	-1	-1	-1	-1	-1	-1	-1	-1	-1	-1	0	0	0	0	0
Cpne8	0.933395	2.51874	1.3166	0.034357	1	0	0.0489606	0.135843	1	1	1	1	1	0	0	1	0	0	0	0	0	0	0
F5	0.933392	0.625819	0.38573	-0.066865	0	-1	0.231579	0.02502	0	0	0	0	0	-1	-1	-1	-1	-1	-1	-1	-1	-1	-1
Ccna2	0.93337	NA	0.118865	NA	1	NA	3.11349e-09	NA	1	1	1	1	1	1	1	1	1	1	1	1	1	1	1
Enpp4	0.933365	2.87485	0.92008	-0.06208	1	-1	0.0317035	0.0528869	1	1	1	1	1	-1	1	-1	1	-1	-1	-1	-1	-1	-1
LOC100502982	0.93336	4.70576	-0.88797	0.19918	-1	0	0.0248679	0.39079	-1	-1	-1	-1	-1	-1	-1	-1	-1	-1	0	0	0	0	0
Endou	0.933355	2.5559	-1.2197	0.090091	-1	1	0.0379903	0.0406272	-1	-1	-1	-1	-1	1	-1	1	1	1	1	1	1	1	1
Gata6	0.93334	2.72949	0.7063	-0.041013	1	-1	0.0260477	0.0673397	1	1	1	1	1	1	1	-1	-1	1	-1	-1	-1	-1	-1
Fam111a	0.933308	3.6519	-0.24923	0.1447	-1	0	0.0823022	0.42334	-1	-1	-1	-1	-1	-1	-1	-1	-1	-1	0	0	0	0	0
Megf8	0.933299	2.68398	-0.3796	0.099472	-1	1	0.0717752	0.0240267	-1	-1	-1	-1	-1	-1	1	1	1	1	1	1	1	1	1
Hadh	0.933281	NA	-0.0749458	NA	-1	NA	3.14089e-09	NA	-1	-1	-1	-1	-1	-1	-1	-1	-1	-1	-1	-1	-1	-1	-1
C230052I12Rik	0.933261	3.00762	-0.90322	0.16705	-1	1	0.0410719	0.027048	-1	-1	-1	-1	-1	1	-1	-1	1	1	1	1	1	1	1
Sipa1	0.933261	2.73981	-0.57505	0.10863	0	1	0.167767	0.0231175	0	0	0	0	0	1	1	1	1	1	1	1	1	1	1
Ncf1	0.933187	2.55582	-0.094972	0.12139	0	1	0.410822	0.0250889	0	0	0	0	0	1	1	1	1	1	1	1	1	1	1
Gbp5	0.933182	2.62617	2.5091	-0.085595	1	-1	0.0311135	0.0957027	1	1	1	1	1	-1	1	-1	1	-1	-1	-1	-1	-1	-1
Nfkbid	0.933165	3.43724	0.812	-0.026664	1	0	0.0255041	0.483842	1	1	1	1	1	1	1	1	1	1	0	0	0	0	0
Ccr2	0.933161	12.3603	-0.57117	0.81819	-1	0	0.0516678	0.23706	-1	-1	-1	-1	-1	-1	-1	-1	-1	-1	0	0	0	0	0
Ces1b	0.933157		0.028326	-0.36483	0	0	0.32189	0.23278	0	0	0	0	0	0	0	0	0	0	0	0	0	0	0
Jmjd7	0.933113	3.48643	-0.29713	0.066056	-1	1	0.0377005	0.0300364	-1	-1	-1	-1	-1	-1	1	-1	1	-1	1	1	1	1	1
Ngrn	0.933094	2.76878	-0.62846	0.076434	-1	1	0.0294517	0.034995	-1	-1	-1	-1	-1	-1	1	-1	1	-1	1	1	1	1	1
Fam176b	0.93309	2.6125	-0.94915	0.11465	-1	1	0.0432122	0.0283781	-1	-1	-1	-1	-1	1	-1	1	1	1	1	1	1	1	1
Tmem106b	0.933081	NA	-0.0578529	NA	-1	NA	3.20292e-09	NA	-1	-1	-1	-1	-1	-1	-1	-1	-1	-1	-1	-1	-1	-1	-1
Brca2	0.933075	16.0928	-0.37719	0.77948	-1	0	0.0309597	0.267724	-1	-1	-1	-1	-1	-1	-1	-1	-1	-1	0	0	0	0	0
Gja1	0.933039	11.9528	0.94162	-0.66537	1	0	0.0285074	0.208443	1	1	1	1	1	1	1	1	1	1	0	0	0	0	0
2210012G02Rik	0.933005	2.55723	-0.5074	0.051806	0	1	0.176696	0.0295198	0	0	0	0	0	1	1	1	1	1	1	1	1	1	1
Ppp1r13b	0.933001	11.6718	-0.45151	0.44249	-1	0	0.0287488	0.202814	-1	-1	-1	-1	-1	-1	-1	-1	-1	-1	0	0	0	0	0
Nt5c3l	0.932899	13.8723	-0.23641	0.44687	-1	0	0.0622735	0.222335	-1	-1	-1	-1	-1	-1	-1	-1	-1	-1	0	0	0	0	0
Alpk1	0.93288	14.5003	0.69635	-0.67633	1	0	0.035724	0.222374	1	1	1	1	1	1	1	1	1	1	0	0	0	0	0
Lcn2	0.932837	2.62962	2.2597	0.052818	1	0	0.047894	0.154366	1	1	1	1	1	1	0	0	0	0	0	0	0	0	0
Pdia4	0.932825	2.87482	-0.18269	0.07133	-1	1	0.0721591	0.0301157	-1	-1	-1	-1	-1	1	-1	1	-1	-1	1	1	1	1	1
Cs	0.932766	9.45006	-0.26115	0.040568	-1	0	0.0570502	0.455047	-1	-1	-1	-1	-1	-1	-1	-1	-1	-1	0	0	0	0	0
Arhgef25	0.932672	7.51146	-0.60524	0.28785	-1	0	0.0281032	0.291338	-1	-1	-1	-1	-1	-1	-1	-1	-1	-1	0	0	0	0	0
Nav2	0.932671	2.7289	0.48549	-0.092197	1	-1	0.0416534	0.0272536	1	1	1	1	1	1	-1	-1	1	-1	-1	-1	-1	-1	-1
Bcl11b	0.932671		0.052332	3.5595	0	0	0.30516	0.14654	0	0	0	0	0	0	0	0	0	0	0	0	0	0	0
Gtf2b	0.932662	8.41972	0.43489	-0.20465	1	0	0.0233751	0.264034	1	1	1	1	1	1	1	1	1	1	0	0	0	0	0
Sox18	0.932615	2.72767	-2.245	0.26492	-1	1	0.0286559	0.0368634	-1	-1	-1	-1	-1	-1	-1	1	1	-1	1	1	1	1	1
Shroom2	0.932578	13.2923	0.40859	-0.58433	1	0	0.0389654	0.192046	1	1	1	1	1	1	1	1	1	1	0	0	0	0	0
Tubgcp6	0.932518	2.493	-0.51732	0.083008	-1	1	0.0523432	0.0251423	-1	-1	-1	-1	-1	1	1	-1	1	1	1	1	1	1	1
Aurka	0.932503	2.5122	-0.706	0.20046	0	1	0.244342	0.0228115	0	0	0	0	0	1	1	1	1	1	1	1	1	1	1
Tiparp	0.932497	2.99257	1.4483	-0.11285	1	-1	0.0411221	0.041896	1	1	1	1	1	-1	-1	-1	-1	1	-1	-1	-1	-1	-1
Tlr3	0.932493	10.9113	0.90785	-0.59066	1	0	0.02321	0.211745	1	1	1	1	1	1	1	1	1	1	0	0	0	0	0
Lass5	0.932482	20.3333	-0.34296	2.0278	-1	0	0.0494259	0.178256	-1	-1	-1	-1	-1	-1	-1	-1	-1	-1	0	0	0	0	0
1810062G17Rik	0.932455	3.38634	-0.58386	0.10269	-1	1	0.0299462	0.0415157	-1	-1	-1	-1	-1	1	-1	-1	-1	-1	1	1	1	1	1
Hk2	0.932437		1.3231	-0.017197	0	0	0.135338	0.210035	0	0	0	0	0	0	0	0	0	0	0	0	0	0	0
LOC100038947	0.932431	NA	0.119073	NA	1	NA	3.41138e-09	NA	1	1	1	1	1	1	1	1	1	1	1	1	1	1	1
Fam129b	0.932398	2.73935	-0.66376	0.14313	-1	1	0.0653159	0.0243496	-1	-1	-1	-1	-1	1	1	1	1	-1	1	1	1	1	1
Cks2	0.932378	2.7185	-0.66484	0.077942	-1	1	0.0440428	0.0292896	-1	-1	-1	-1	-1	1	1	-1	1	1	1	1	1	1	1
Trim59	0.932268	NA	0.116652	NA	1	NA	3.46552e-09	NA	1	1	1	1	1	1	1	1	1	1	1	1	1	1	1
AI464131	0.932251	2.72901	-0.61277	0.045294	-1	1	0.0303159	0.04643	-1	-1	-1	-1	-1	-1	1	-1	1	1	1	1	1	1	1
Akna	0.932224	16.709	-0.1654	0.58635	-1	0	0.0948064	0.195936	-1	-1	-1	-1	-1	-1	-1	-1	-1	-1	0	0	0	0	0
Nr5a2	0.9322	3.61176	0.37356	-0.084191	1	0	0.0306447	0.400222	1	1	1	1	1	1	1	1	1	1	0	0	0	0	0
Cdyl2	0.932193	18.9049	-0.28769	1.1374	-1	0	0.0426011	0.216025	-1	-1	-1	-1	-1	-1	-1	-1	-1	-1	0	0	0	0	0
Arhgef18	0.932188	2.47561	-0.44323	0.059016	0	1	0.130275	0.0247501	0	0	0	0	0	1	1	1	1	1	1	1	1	1	1
Rrp36	0.932175	3.2534	-0.35168	0.062456	-1	1	0.0298204	0.0415426	-1	-1	-1	-1	-1	1	-1	-1	-1	-1	1	1	1	1	1
Ltbp4	0.932108	15.0751	-0.31184	0.24582	-1	0	0.0607752	0.312168	-1	-1	-1	-1	-1	-1	-1	-1	-1	-1	0	0	0	0	0
Ces3b	0.932061	NA	-0.106551	NA	-1	NA	3.53534e-09	NA	-1	-1	-1	-1	-1	-1	-1	-1	-1	-1	-1	-1	-1	-1	-1
Klc4	0.932027	16.8227	-0.19253	0.25645	-1	0	0.0516263	0.213062	-1	-1	-1	-1	-1	-1	-1	-1	-1	-1	0	0	0	0	0
Prtn3	0.932015	NA	0.119809	NA	1	NA	3.55096e-09	NA	1	1	1	1	1	1	1	1	1	1	1	1	1	1	1
Cyp2d10	0.931994	NA	-0.0619027	NA	-1	NA	3.55818e-09	NA	-1	-1	-1	-1	-1	-1	-1	-1	-1	-1	-1	-1	-1	-1	-1
Wtip	0.931936	3.52901	-0.37326	0.10522	-1	1	0.0440798	0.0356257	-1	-1	-1	-1	-1	-1	-1	-1	-1	1	1	1	1	1	1
Fmo3	0.931881		0.04652	-1.1056	0	0	0.354204	0.171163	0	0	0	0	0	0	0	0	0	0	0	0	0	0	0
Egfl7	0.931809	8.94193	-0.88529	0.58481	-1	0	0.0305392	0.275241	-1	-1	-1	-1	-1	-1	-1	-1	-1	-1	0	0	0	0	0
Acsm5	0.931807	NA	-0.0999721	NA	-1	NA	3.62253e-09	NA	-1	-1	-1	-1	-1	-1	-1	-1	-1	-1	-1	-1	-1	-1	-1
Tmem173	0.931788	2.67495	0.96191	0.00045627	1	0	0.0310168	0.489061	1	1	1	1	1	1	0	1	1	0	0	0	0	0	0
Areg	0.93178	NA	0.217605	NA	1	NA	3.63194e-09	NA	1	1	1	1	1	1	1	1	1	1	1	1	1	1	1
Slc9a3r1	0.931754	2.56241	0.6099	-0.070933	1	-1	0.0434596	0.0290973	1	1	1	1	1	-1	-1	-1	1	-1	-1	-1	-1	-1	-1
Mthfsd	0.931725	3.86222	-0.30415	0.096271	-1	0	0.0405912	0.391895	-1	-1	-1	-1	-1	-1	-1	-1	-1	-1	0	0	0	0	0
Phlda1	0.931723	2.87145	1.215	-0.14623	1	-1	0.0327835	0.0326318	1	1	1	1	1	1	-1	-1	-1	1	-1	-1	-1	-1	-1
Mdk	0.931676	NA	0.0560128	NA	1	NA	3.66814e-09	NA	1	1	1	1	1	1	1	1	1	1	1	1	1	1	1
Thrsp	0.93164	15.393	-0.57763	0.44122	-1	0	0.0595483	0.329448	-1	-1	-1	-1	-1	-1	-1	-1	-1	-1	0	0	0	0	0
Lrp11	0.93159		-0.14533	0.53552	0	0	0.140533	0.219521	0	0	0	0	0	0	0	0	0	0	0	0	0	0	0
Sftpd	0.931558	NA	0.101586	NA	1	NA	3.70971e-09	NA	1	1	1	1	1	1	1	1	1	1	1	1	1	1	1
Cyp2b13	0.931549	NA	-0.157287	NA	-1	NA	3.71275e-09	NA	-1	-1	-1	-1	-1	-1	-1	-1	-1	-1	-1	-1	-1	-1	-1
Cyp4f16	0.931549	3.1614	-0.11839	0.076504	0	1	0.383021	0.0240539	0	0	0	0	0	1	1	1	1	1	1	1	1	1	1
Gadd45b	0.931539	2.5577	2.041	-0.089955	1	-1	0.0394132	0.0722267	1	1	1	1	1	-1	-1	-1	1	-1	-1	-1	-1	-1	-1
0610030E20Rik	0.931507	7.69724	-0.49573	0.20755	-1	0	0.0233854	0.259291	-1	-1	-1	-1	-1	-1	-1	-1	-1	-1	0	0	0	0	0
Birc3	0.931502	2.9187	1.1918	-0.11607	1	-1	0.0396969	0.0347269	1	1	1	1	1	1	-1	-1	-1	-1	-1	-1	-1	-1	-1
Rcor3	0.9315	2.55854	-0.79351	0.073722	-1	1	0.0406185	0.0330922	-1	-1	-1	-1	-1	1	-1	1	1	1	1	1	1	1	1
Arl2bp	0.931493	8.98936	-0.20567	0.19657	-1	0	0.061796	0.284358	-1	-1	-1	-1	-1	-1	-1	-1	-1	-1	0	0	0	0	0
Usp28	0.931459	5.76491	-0.54774	0.1521	-1	0	0.0244167	0.344477	-1	-1	-1	-1	-1	-1	-1	-1	-1	-1	0	0	0	0	0
Agpat2	0.931458	2.61825	-0.58498	0.0048406	-1	0	0.0423594	0.292958	-1	-1	-1	-1	-1	-1	0	0	0	0	0	0	0	0	0
Olfr576	0.931458	2.78804	0.52677	0.017297	1	0	0.0357224	0.15311	1	1	1	1	1	1	1	0	0	1	0	0	0	0	0
Bag3	0.931419	2.70919	0.60943	-0.043038	0	-1	0.125661	0.0395487	0	0	0	0	0	-1	-1	-1	-1	-1	-1	-1	-1	-1	-1
Cenpc1	0.931373	3.05604	-0.6784	0.13685	-1	1	0.0350537	0.039457	-1	-1	-1	-1	-1	-1	-1	-1	-1	1	1	1	1	1	1
Hdhd3	0.931355		-0.64774	0.013564	0	0	0.175266	0.147641	0	0	0	0	0	0	0	0	0	0	0	0	0	0	0
Erp29	0.931339	3.73829	-0.30342	0.081861	-1	0	0.0355662	0.379447	-1	-1	-1	-1	-1	-1	-1	-1	-1	-1	0	0	0	0	0
Vars	0.931326	NA	0.0599131	NA	1	NA	3.79267e-09	NA	1	1	1	1	1	1	1	1	1	1	1	1	1	1	1
Fbxo6	0.931299		-0.093072	0.091137	0	0	0.134364	0.401113	0	0	0	0	0	0	0	0	0	0	0	0	0	0	0
2810422O20Rik	0.931295	2.64354	-0.55699	0.065621	-1	1	0.0296019	0.0360593	-1	-1	-1	-1	-1	1	-1	1	-1	-1	1	1	1	1	1
Rassf1	0.931276	8.46129	0.74551	-0.27514	1	0	0.0254046	0.301879	1	1	1	1	1	1	1	1	1	1	0	0	0	0	0
Eepd1	0.931233	10.0907	-0.80224	0.50215	-1	0	0.0231158	0.389063	-1	-1	-1	-1	-1	-1	-1	-1	-1	-1	0	0	0	0	0
Eif1a	0.931207	7.92481	0.48576	-0.19396	1	0	0.0229395	0.308623	1	1	1	1	1	1	1	1	1	1	0	0	0	0	0
Slc17a2	0.931204	2.88461	0.35478	-0.11768	1	-1	0.0640342	0.0304663	1	1	1	1	1	1	1	1	-1	-1	-1	-1	-1	-1	-1
Gm10144	0.93118	NA	0.0548124	NA	1	NA	3.84532e-09	NA	1	1	1	1	1	1	1	1	1	1	1	1	1	1	1
Masp2	0.931175	NA	-0.0532226	NA	-1	NA	3.84718e-09	NA	-1	-1	-1	-1	-1	-1	-1	-1	-1	-1	-1	-1	-1	-1	-1
Cln8	0.93116	6.93051	-0.65572	0.2861	-1	0	0.0284337	0.284029	-1	-1	-1	-1	-1	-1	-1	-1	-1	-1	0	0	0	0	0
Fpr2	0.931094	13.6234	0.4678	-0.34788	1	0	0.0441381	0.279753	1	1	1	1	1	1	1	1	1	1	0	0	0	0	0
Tmem170	0.931067	5.23478	-0.17156	0.088318	-1	0	0.0547428	0.387337	-1	-1	-1	-1	-1	-1	-1	-1	-1	-1	0	0	0	0	0
Mthfr	0.931039	11.0328	-0.38667	0.40299	-1	0	0.0395727	0.244634	-1	-1	-1	-1	-1	-1	-1	-1	-1	-1	0	0	0	0	0
Tff3	0.931003		-0.076894	0.37841	0	0	0.306006	0.45414	0	0	0	0	0	0	0	0	0	0	0	0	0	0	0
Rassf2	0.931002	2.62109	-0.1918	0.10778	0	1	0.16034	0.0256435	0	0	0	0	0	1	1	1	1	0	1	1	1	1	1
Mndal	0.930997	3.02847	0.73894	-0.029563	1	0	0.0292949	0.11007	1	1	1	1	1	0	1	0	1	1	0	0	0	0	0
Ncapd2	0.930894		-0.072573	0.58471	0	0	0.193158	0.186503	0	0	0	0	0	0	0	0	0	0	0	0	0	0	0
BC022687	0.930877	NA	0.0907541	NA	1	NA	3.95754e-09	NA	1	1	1	1	1	1	1	1	1	1	1	1	1	1	1
Irs2	0.930857	8.25665	0.55655	-0.30697	1	0	0.0291745	0.269753	1	1	1	1	1	1	1	1	1	1	0	0	0	0	0
Cth	0.93085	NA	-0.116102	NA	-1	NA	3.96736e-09	NA	-1	-1	-1	-1	-1	-1	-1	-1	-1	-1	-1	-1	-1	-1	-1
Junb	0.930838	2.84648	1.8453	-0.063749	1	0	0.0327859	0.105738	1	1	1	1	1	0	1	1	0	0	0	0	0	0	0
Spice1	0.930835	16.9856	-0.42581	1.1189	-1	0	0.0403237	0.271872	-1	-1	-1	-1	-1	-1	-1	-1	-1	-1	0	0	0	0	0
Zfp213	0.930834	3.14849	-0.33193	0.068053	-1	1	0.036912	0.0309057	-1	-1	-1	-1	-1	-1	-1	1	-1	1	1	1	1	1	1
Ifi27l2a	0.930826		-0.15759	0.50751	0	0	0.120407	0.249206	0	0	0	0	0	0	0	0	0	0	0	0	0	0	0
Mgst2	0.930816		-0.062851	0.20048	0	0	0.279282	0.387702	0	0	0	0	0	0	0	0	0	0	0	0	0	0	0
Smtn	0.930765	2.93398	-0.62	0.12842	-1	1	0.0411406	0.0302785	-1	-1	-1	-1	-1	-1	-1	1	1	-1	1	1	1	1	1
Ptk6	0.930742	2.83724	-1.1733	0.0077852	-1	0	0.0340762	0.348516	-1	-1	-1	-1	-1	-1	0	0	0	-1	0	0	0	0	0
Snx1	0.930742	11.3923	-0.22618	0.24983	-1	0	0.0422788	0.21902	-1	-1	-1	-1	-1	-1	-1	-1	-1	-1	0	0	0	0	0
Flna	0.93071		-0.03036	0.1279	0	0	0.29223	0.389908	0	0	0	0	0	0	0	0	0	0	0	0	0	0	0
Arhgef2	0.930705	NA	0.0790426	NA	1	NA	4.02224e-09	NA	1	1	1	1	1	1	1	1	1	1	1	1	1	1	1
Lpin3	0.930693	16.8891	-0.31984	0.79837	-1	0	0.0362704	0.263071	-1	-1	-1	-1	-1	-1	-1	-1	-1	-1	0	0	0	0	0
Dusp6	0.930673	2.68127	-0.72228	0.08503	0	1	0.130426	0.0276647	0	0	0	0	0	1	1	1	1	1	1	1	1	1	1
2210404O09Rik	0.930598	3.62123	-0.12864	0.069904	-1	0	0.0765667	0.394401	-1	-1	-1	-1	-1	-1	-1	-1	-1	-1	0	0	0	0	0
Slco4a1	0.930582	3.38512	0.66673	0.0066682	1	0	0.0307095	0.494546	1	1	1	1	1	1	1	1	1	1	0	0	0	0	0
Mycn	0.930537	2.63033	-1.7303	0.23409	-1	1	0.0372083	0.0292225	-1	-1	-1	-1	-1	-1	1	-1	1	1	1	1	1	1	1
Gm12185	0.930521	4.38596	0.78924	0.033999	1	0	0.0403059	0.486627	1	1	1	1	1	1	1	1	1	1	0	0	0	0	0
Ttl	0.93048	2.62501	-0.78687	0.10456	-1	1	0.0364786	0.0296569	-1	-1	-1	-1	-1	1	-1	1	-1	1	1	1	1	1	1
Cep192	0.930436		-0.049323	0.14877	0	0	0.263433	0.370638	0	0	0	0	0	0	0	0	0	0	0	0	0	0	0
4931408A02Rik	0.930427	8.16404	-0.36183	0.25749	-1	0	0.0453847	0.323583	-1	-1	-1	-1	-1	-1	-1	-1	-1	-1	0	0	0	0	0
Capn2	0.930426	2.82366	-0.34745	0.068919	-1	1	0.0617558	0.0248118	-1	-1	-1	-1	-1	1	1	1	-1	1	1	1	1	1	1
Cd248	0.930426	10.6964	-0.56016	0.46956	-1	0	0.0278701	0.188656	-1	-1	-1	-1	-1	-1	-1	-1	-1	-1	0	0	0	0	0
Fam198a	0.930415	11.6707	-0.76382	0.42874	-1	0	0.0385912	0.310259	-1	-1	-1	-1	-1	-1	-1	-1	-1	-1	0	0	0	0	0
Slc7a3	0.930401	NA	0.169576	NA	1	NA	4.13894e-09	NA	1	1	1	1	1	1	1	1	1	1	1	1	1	1	1
Pcdh12	0.93039	2.9115	-1.5499	0.12673	-1	1	0.0408497	0.0394089	-1	-1	-1	-1	-1	1	1	1	-1	1	1	1	1	1	1
LOC100038746	0.93035	8.78921	-0.63887	0.3427	-1	0	0.0246088	0.273074	-1	-1	-1	-1	-1	-1	-1	-1	-1	-1	0	0	0	0	0
Bok	0.930347	1.83729	-0.63971	0.10467	0	1	0.151825	0.0232829	0	0	0	0	0	1	1	1	1	1	1	1	1	1	1
Acsl1	0.930347	NA	-0.0869832	NA	-1	NA	4.15997e-09	NA	-1	-1	-1	-1	-1	-1	-1	-1	-1	-1	-1	-1	-1	-1	-1
Gimap7	0.930336		-0.13487	2.0592	0	0	0.199888	0.268843	0	0	0	0	0	0	0	0	0	0	0	0	0	0	0
Sec61a2	0.93031		-0.091482	0.31314	0	0	0.133631	0.230821	0	0	0	0	0	0	0	0	0	0	0	0	0	0	0
Irs1	0.930279	3.55603	-1.3809	0.15099	-1	0	0.0233153	0.41585	-1	-1	-1	-1	-1	-1	-1	-1	-1	-1	0	0	0	0	0
Gm8120	0.930209	18.0506	0.28117	-0.44483	1	0	0.0580495	0.217564	1	1	1	1	1	1	1	1	1	1	0	0	0	0	0
Ankrd50	0.930175	2.9743	-0.42647	0.097183	-1	1	0.0445258	0.030059	-1	-1	-1	-1	-1	-1	1	-1	-1	1	1	1	1	1	1
Fam26f	0.930165	2.62079	2.5766	-0.16936	1	-1	0.0306624	0.0500628	1	1	1	1	1	-1	1	-1	1	-1	-1	-1	-1	-1	-1
Bard1	0.930123	NA	0.113524	NA	1	NA	4.24807e-09	NA	1	1	1	1	1	1	1	1	1	1	1	1	1	1	1
S1pr3	0.93012		0.51222	-0.013441	0	0	0.176334	0.121714	0	0	0	0	0	0	0	0	0	0	0	0	0	0	0
Arhgef26	0.930118	8.16707	0.99948	-0.42893	1	0	0.0232829	0.301976	1	1	1	1	1	1	1	1	1	1	0	0	0	0	0
5430435G22Rik	0.930098	2.91076	-0.87393	0.18782	-1	1	0.0663494	0.0246545	-1	-1	-1	-1	-1	1	1	1	-1	1	1	1	1	1	1
Hmgn3	0.930093	4.22655	-0.46814	0.11851	-1	0	0.0309957	0.396692	-1	-1	-1	-1	-1	-1	-1	-1	-1	-1	0	0	0	0	0
Sun3	0.930078	NA	-0.146552	NA	-1	NA	4.26566e-09	NA	-1	-1	-1	-1	-1	-1	-1	-1	-1	-1	-1	-1	-1	-1	-1
Lta	0.930055		1.3793	-0.0080344	0	0	0.134847	0.308658	0	0	0	0	0	0	0	0	0	0	0	0	0	0	0
Rdh11	0.930049	9.1144	-0.60526	0.26264	-1	0	0.0244748	0.321014	-1	-1	-1	-1	-1	-1	-1	-1	-1	-1	0	0	0	0	0
Rcl1	0.929999	2.66228	0.73247	-0.088425	1	-1	0.0301129	0.0360447	1	1	1	1	1	1	-1	1	-1	1	-1	-1	-1	-1	-1
Csf2	0.929974	2.81415	1.3315	-0.078405	1	-1	0.0276719	0.0667153	1	1	1	1	1	-1	1	-1	1	1	-1	-1	-1	-1	-1
Podn	0.929958	14.1111	-0.34242	0.29119	-1	0	0.039474	0.278487	-1	-1	-1	-1	-1	-1	-1	-1	-1	-1	0	0	0	0	0
C130050O18Rik	0.929948	2.86343	-0.50764	0.1128	-1	1	0.0648526	0.0247983	-1	-1	-1	-1	-1	-1	1	1	1	1	1	1	1	1	1
Gm12250	0.929944	10.3448	1.3566	-0.72906	1	0	0.025439	0.281077	1	1	1	1	1	1	1	1	1	1	0	0	0	0	0
Cep250	0.929943	12.0213	-0.48262	0.47364	-1	0	0.0255511	0.161685	-1	-1	-1	-1	-1	-1	-1	-1	-1	-1	0	0	0	0	0
Mkl1	0.929939	2.96489	0.61631	-0.022636	1	-1	0.0430224	0.0904187	1	1	1	1	1	-1	-1	-1	1	-1	-1	-1	-1	-1	-1
Sucnr1	0.929911	13.5169	-0.82735	0.62799	-1	0	0.0375703	0.263929	-1	-1	-1	-1	-1	-1	-1	-1	-1	-1	0	0	0	0	0
Fam60a	0.929901	19.5728	0.41916	-1.2302	1	0	0.038199	0.245636	1	1	1	1	1	1	1	1	1	1	0	0	0	0	0
Cyfip2	0.929876	NA	0.106822	NA	1	NA	4.34676e-09	NA	1	1	1	1	1	1	1	1	1	1	1	1	1	1	1
Sirt7	0.929873	11.0856	-0.41566	0.31067	-1	0	0.0234697	0.192374	-1	-1	-1	-1	-1	-1	-1	-1	-1	-1	0	0	0	0	0
Palb2	0.929815	10.8801	-0.4547	0.42262	-1	0	0.035219	0.227036	-1	-1	-1	-1	-1	-1	-1	-1	-1	-1	0	0	0	0	0
Gpc1	0.929802	3.64439	-0.30697	0.11041	-1	0	0.0496085	0.41151	-1	-1	-1	-1	-1	-1	-1	-1	-1	-1	0	0	0	0	0
Pecr	0.929801		-0.45717	-0.038194	-1	-1	0.0676442	0.0630307	-1	-1	-1	-1	-1	-1	-1	-1	-1	-1	-1	-1	-1	-1	-1
Mtmr11	0.92977	2.0125	-0.91464	0.19611	0	1	0.195809	0.0233204	0	0	0	0	0	1	1	1	1	1	1	1	1	1	1
Sphk1	0.929698	2.73918	1.8809	-0.026294	1	0	0.0342663	0.229483	1	1	1	1	1	1	0	1	0	0	0	0	0	0	0
Rltpr	0.929683	7.9584	0.32736	-0.046056	1	0	0.0386327	0.44792	1	1	1	1	1	1	1	1	1	1	0	0	0	0	0
Defb15	0.929645	10.861	0.86399	-0.64182	1	0	0.0235651	0.130361	1	1	1	1	1	1	1	1	1	1	0	0	0	0	0
Lss	0.92961	2.71922	-0.90826	0.098569	0	1	0.173513	0.0302527	0	0	0	0	0	1	1	1	1	1	1	1	1	1	1
Tcea3	0.929571	23.9277	-0.079085	-1.9964	-1	0	0.0444671	0.166894	-1	-1	-1	-1	-1	-1	-1	-1	-1	-1	0	-1	-1	0	0
Hbegf	0.929482	3.12696	1.4771	-0.068175	1	0	0.0268635	0.118635	1	1	1	1	1	0	1	1	1	1	0	0	0	0	0
Sall2	0.929362	2.74823	-1.7192	0.20458	-1	1	0.0294653	0.0375866	-1	-1	-1	-1	-1	-1	-1	1	1	-1	1	1	1	1	1
Pdcd1lg2	0.929347	11.6605	0.89156	-0.56237	1	0	0.0300082	0.243088	1	1	1	1	1	1	1	1	1	1	0	0	0	0	0
LOC100503910	0.92934	2.78453	1.2768	-0.027006	1	0	0.0453693	0.156695	1	1	1	1	1	0	1	0	0	0	0	0	0	0	0
Apol10a	0.929318	9.71319	1.4877	-0.85006	1	0	0.023346	0.22018	1	1	1	1	1	1	1	1	1	1	0	0	0	0	0
Hpgd	0.929302	NA	-0.0554872	NA	-1	NA	4.58475e-09	NA	-1	-1	-1	-1	-1	-1	-1	-1	-1	-1	-1	-1	-1	-1	-1
Tbk1	0.929282	3.09863	0.58863	-0.0445	1	-1	0.0280292	0.0609084	1	1	1	1	1	-1	-1	1	1	1	-1	-1	-1	-1	-1
Wdyhv1	0.92926	3.64237	-0.38912	0.078673	-1	0	0.0280169	0.411734	-1	-1	-1	-1	-1	-1	-1	-1	-1	-1	0	0	0	0	0
Nfkb1	0.929218	2.85452	0.94435	-0.061687	1	-1	0.0401905	0.0483985	1	1	1	1	1	-1	-1	-1	1	-1	-1	-1	-1	-1	-1
AU040972	0.929203	2.20356	0.23642	0.055137	0	1	0.300654	0.0353918	0	0	0	0	0	1	1	1	1	1	1	1	1	1	1
Gpr132	0.929163		0.74197	0.043914	1	1	0.0465176	0.0842308	1	1	1	1	1	1	1	1	1	1	1	1	1	1	1
Zfp354a	0.929161	6.72962	-1.0233	0.35672	-1	0	0.0241669	0.329159	-1	-1	-1	-1	-1	-1	-1	-1	-1	-1	0	0	0	0	0
Scd2	0.92916	2.49531	-1.1724	0.16254	-1	1	0.0481247	0.0270755	-1	-1	-1	-1	-1	1	1	1	-1	1	1	1	1	1	1
Kcnk6	0.929158	13.143	-0.8132	0.88914	-1	0	0.0239132	0.160392	-1	-1	-1	-1	-1	-1	-1	-1	-1	-1	0	0	0	0	0
Mettl4	0.929104	3.4669	-0.38357	0.10569	-1	1	0.0424644	0.0381944	-1	-1	-1	-1	-1	-1	-1	-1	-1	1	1	1	1	1	1
Slc34a2	0.929092	1.0542	-1.6059	-0.097175	0	-1	0.155117	0.0472101	0	0	0	0	0	-1	-1	-1	-1	-1	-1	-1	-1	-1	-1
Rpap1	0.929062	2.96838	-0.43474	0.059599	-1	1	0.0309507	0.0352213	-1	-1	-1	-1	-1	-1	-1	-1	1	1	1	1	1	1	1
Aldh5a1	0.929044	21.8232	-0.11538	0.45771	-1	0	0.0892169	0.170298	-1	-1	-1	-1	-1	-1	-1	-1	-1	-1	0	0	0	0	0
Sox6	0.929029	2.43189	0.16538	-0.072217	0	-1	0.316646	0.0241761	0	0	0	0	0	-1	-1	-1	-1	-1	-1	-1	-1	-1	-1
Wisp2	0.928996	14.5192	-0.73878	1.4288	-1	0	0.0502548	0.186532	-1	-1	-1	-1	-1	-1	-1	-1	-1	-1	0	0	0	0	0
Nipsnap1	0.928989	NA	-0.0841345	NA	-1	NA	4.71893e-09	NA	-1	-1	-1	-1	-1	-1	-1	-1	-1	-1	-1	-1	-1	-1	-1
Txnl4b	0.928985	2.82143	-1.0339	0.10786	-1	1	0.0327949	0.0362166	-1	-1	-1	-1	-1	1	-1	-1	1	1	1	1	1	1	1
Nfic	0.928864		-0.29436	-0.027074	-1	-1	0.0539499	0.0707182	-1	-1	-1	-1	-1	-1	-1	-1	-1	-1	-1	-1	-1	-1	-1
Asl	0.928854	NA	-0.0843137	NA	-1	NA	4.77763e-09	NA	-1	-1	-1	-1	-1	-1	-1	-1	-1	-1	-1	-1	-1	-1	-1
Hist1h2ab	0.928842	NA	0.126438	NA	1	NA	4.78282e-09	NA	1	1	1	1	1	1	1	1	1	1	1	1	1	1	1
H3f3b	0.928821	6.70805	0.88417	-0.24765	1	0	0.0233905	0.361226	1	1	1	1	1	1	1	1	1	1	0	0	0	0	0
Tacc3	0.928819		-0.086322	0.22512	0	0	0.186484	0.340954	0	0	0	0	0	0	0	0	0	0	0	0	0	0	0
Exo1	0.928796	NA	0.134203	NA	1	NA	4.80333e-09	NA	1	1	1	1	1	1	1	1	1	1	1	1	1	1	1
Tomm40l	0.928776	5.90736	-0.50145	0.19799	-1	0	0.0339502	0.333343	-1	-1	-1	-1	-1	-1	-1	-1	-1	-1	0	0	0	0	0
Mettl7b	0.928764		-0.33648	-0.042515	-1	-1	0.060285	0.0570775	-1	-1	-1	-1	-1	-1	-1	-1	-1	-1	-1	-1	-1	-1	-1
Rilpl1	0.928747	13.6675	-0.61183	0.81387	-1	0	0.0293057	0.326016	-1	-1	-1	-1	-1	-1	-1	-1	-1	-1	0	0	0	0	0
Esrrb	0.928675	4.46617	-0.64704	0.073503	-1	0	0.0246164	0.442655	-1	-1	-1	-1	-1	-1	-1	-1	-1	-1	0	0	0	0	0
Sdhb	0.928662	NA	-0.0635877	NA	-1	NA	4.86251e-09	NA	-1	-1	-1	-1	-1	-1	-1	-1	-1	-1	-1	-1	-1	-1	-1
Ttc30b	0.928638	5.52932	-0.70812	0.19135	-1	0	0.0254838	0.32522	-1	-1	-1	-1	-1	-1	-1	-1	-1	-1	0	0	0	0	0
Gm14548	0.928617	NA	0.0994488	NA	1	NA	4.88248e-09	NA	1	1	1	1	1	1	1	1	1	1	1	1	1	1	1
Akr1b3	0.928611	9.87306	-0.27631	0.26621	-1	0	0.0498366	0.314207	-1	-1	-1	-1	-1	-1	-1	-1	-1	-1	0	0	0	0	0
Rgs17	0.928607	2.93924	-0.3586	0.16185	0	1	0.128912	0.0256704	0	0	0	0	0	0	1	1	1	1	1	1	1	1	1
Trib1	0.9286	2.64313	0.91984	-0.073369	1	-1	0.0272909	0.049228	1	1	1	1	1	1	-1	1	-1	1	-1	-1	-1	-1	-1
Myc	0.928555	3.29641	0.93668	0.0014651	1	0	0.0335612	0.471768	1	1	1	1	1	1	1	1	0	0	0	0	0	0	0
Slc2a2	0.928533	NA	-0.129479	NA	-1	NA	4.92035e-09	NA	-1	-1	-1	-1	-1	-1	-1	-1	-1	-1	-1	-1	-1	-1	-1
Gfi1	0.928531	10.4368	1.165	-0.51268	1	0	0.0330569	0.359525	1	1	1	1	1	1	1	1	1	1	0	0	0	0	0
Lpcat3	0.928524	3.19619	-0.67113	0.021188	-1	0	0.0296983	0.147705	-1	-1	-1	-1	-1	-1	0	-1	-1	0	0	0	0	0	0
Pcgf5	0.928518	12.6893	0.38909	-0.30116	1	0	0.0342894	0.261676	1	1	1	1	1	1	1	1	1	1	0	0	0	0	0
Serpinb6b	0.928505	24.1818	0.093192	-1.7901	1	0	0.0264998	0.155923	1	1	1	1	1	1	1	1	1	1	1	0	1	1	0
Ssx2ip	0.928479	3.24451	0.74463	-0.097477	1	-1	0.0274907	0.0446151	1	1	1	1	1	-1	1	1	1	1	-1	-1	-1	-1	-1
Abcc9	0.928475	18.1759	-0.18493	0.26762	-1	0	0.0686776	0.264607	-1	-1	-1	-1	-1	-1	-1	-1	-1	-1	0	0	0	0	0
Dnajc10	0.928394	NA	0.0691266	NA	1	NA	4.9829e-09	NA	1	1	1	1	1	1	1	1	1	1	1	1	1	1	1
Gm8909	0.928373	10.012	0.24458	0.0042854	1	0	0.0744472	0.496766	1	1	1	1	1	1	1	1	1	1	0	0	0	0	0
Tcfap4	0.928346	3.61614	-0.77679	0.14146	-1	0	0.0278652	0.405681	-1	-1	-1	-1	-1	-1	-1	-1	-1	-1	0	0	0	0	0
Lactb2	0.928338	10.7076	-0.29654	0.11174	-1	0	0.0389454	0.368448	-1	-1	-1	-1	-1	-1	-1	-1	-1	-1	0	0	0	0	0
Dynll1	0.928302	3.30295	-0.48255	0.16544	0	1	0.103338	0.0245899	0	0	0	0	0	1	1	1	0	1	1	1	1	1	1
Rcan1	0.928273	6.29016	0.87598	-0.2624	1	0	0.0238221	0.345351	1	1	1	1	1	1	1	1	1	1	0	0	0	0	0
Myo1f	0.928264	2.66985	-0.62812	0.17515	-1	1	0.085961	0.0249281	-1	-1	-1	-1	-1	1	-1	1	1	1	1	1	1	1	1
Prlr	0.928243	23.8977	-0.072788	-1.0441	-1	0	0.032957	0.327019	-1	-1	-1	-1	-1	-1	-1	-1	-1	-1	0	-1	-1	0	-1
Gldc	0.928205		-0.22265	-0.03307	-1	-1	0.0905965	0.0493871	-1	-1	-1	-1	-1	-1	-1	-1	-1	-1	-1	-1	-1	-1	-1
Trim41	0.928175	3.49463	-0.40794	0.071455	-1	0	0.0273096	0.396337	-1	-1	-1	-1	-1	-1	-1	-1	-1	-1	0	0	0	0	0
Mccc1	0.92815	15.2881	-0.13178	0.077736	-1	0	0.0787047	0.404631	-1	-1	-1	-1	-1	-1	-1	-1	-1	-1	0	0	0	0	0
Adcy7	0.92813	2.95154	-0.93726	0.17437	-1	1	0.0432548	0.0281206	-1	-1	-1	-1	-1	-1	-1	1	1	1	1	1	1	1	1
Ppp3cc	0.928095		-0.027944	0.40822	0	0	0.290412	0.196255	0	0	0	0	0	0	0	0	0	0	0	0	0	0	0
Mcm5	0.928047		-0.078335	0.5671	0	0	0.277382	0.28705	0	0	0	0	0	0	0	0	0	0	0	0	0	0	0
F7	0.928022	2.7685	-0.19056	-0.052338	0	-1	0.321434	0.0356917	0	0	0	0	0	-1	-1	-1	-1	-1	-1	-1	-1	-1	-1
Bola1	0.928018	2.47241	-0.751	0.091349	0	1	0.125793	0.026375	0	0	0	0	0	1	1	1	1	1	1	1	1	1	1
Ifna11	0.928018	NA	0.0906643	NA	1	NA	5.1566e-09	NA	1	1	1	1	1	1	1	1	1	1	1	1	1	1	1
Lass6	0.927993	10.7581	0.76272	-0.45649	1	0	0.0249242	0.236054	1	1	1	1	1	1	1	1	1	1	0	0	0	0	0
2210009G21Rik	0.927953	15.1432	-0.25723	0.50611	-1	0	0.0426624	0.138747	-1	-1	-1	-1	-1	-1	-1	-1	-1	-1	0	0	0	0	0
Apln	0.927953	NA	0.234951	NA	1	NA	5.1869e-09	NA	1	1	1	1	1	1	1	1	1	1	1	1	1	1	1
Vcam1	0.92787	2.47985	1.8267	-0.07437	0	-1	0.131388	0.0650867	0	0	0	0	0	-1	-1	-1	-1	-1	-1	-1	-1	-1	-1
Lin37	0.927865	2.67619	-0.60112	0.072551	0	1	0.156404	0.0271423	0	0	0	0	0	1	1	1	1	1	1	1	1	1	1
G6pc	0.92779	2.66011	-3.1393	0.2441	-1	1	0.0274411	0.0507531	-1	-1	-1	-1	-1	-1	1	-1	1	-1	1	1	1	1	1
Fam55b	0.927762	24.1279	-0.09448	2.16	-1	0	0.0304809	0.117311	-1	-1	-1	-1	-1	-1	-1	-1	-1	-1	-1	0	0	0	-1
Cmtm3	0.92774	2.41473	-0.43089	0.12374	0	1	0.237954	0.0237937	0	0	0	0	0	1	1	1	1	1	1	1	1	1	1
Cxcl12	0.927726	2.60187	-0.66029	0.032467	0	1	0.137761	0.0643239	0	0	0	0	0	1	1	1	1	1	1	1	1	1	1
Col4a1	0.927576	3.07963	0.73557	-0.0326	1	-1	0.0412296	0.080133	1	1	1	1	1	1	-1	-1	-1	-1	-1	-1	-1	-1	-1
Ptpn22	0.927571	20.5282	0.31329	-1.0717	1	0	0.0603833	0.109585	1	1	1	1	1	1	1	1	1	1	0	0	0	0	0
Lgmn	0.927541		-0.037888	0.11417	0	0	0.267174	0.39648	0	0	0	0	0	0	0	0	0	0	0	0	0	0	0
Plod2	0.927524	NA	0.141818	NA	1	NA	5.39209e-09	NA	1	1	1	1	1	1	1	1	1	1	1	1	1	1	1
Ccdc109b	0.927514	2.23448	-0.38069	0.17204	0	1	0.310325	0.0251027	0	0	0	0	0	1	1	1	1	1	1	1	1	1	1
Eif2ak2	0.927512	2.67295	0.8889	-0.029074	1	0	0.0286224	0.120804	1	1	1	1	1	1	0	1	0	1	0	0	0	0	0
LOC100047292	0.927435	2.71022	-0.43186	0.11123	-1	1	0.0549609	0.0310832	-1	-1	-1	-1	-1	-1	1	-1	1	-1	1	1	1	1	1
Rab8b	0.927404	7.92142	0.6998	-0.24755	1	0	0.0246297	0.294125	1	1	1	1	1	1	1	1	1	1	0	0	0	0	0
Il6	0.927344	6.78924	1.7354	-0.35848	1	0	0.0270847	0.408235	1	1	1	1	1	1	1	1	1	1	0	0	0	0	0
Plcl2	0.927325	2.83518	0.41194	-0.058392	0	-1	0.172356	0.0261845	0	0	0	0	0	-1	-1	-1	-1	-1	-1	-1	-1	-1	-1
Tuba1a	0.927306	17.1494	-0.21032	0.76999	-1	0	0.0898373	0.141846	-1	-1	-1	-1	-1	-1	-1	-1	-1	-1	0	0	0	0	0
Gm10030	0.927281	2.89175	0.79312	-0.016185	1	0	0.0338883	0.183547	1	1	1	1	1	0	0	0	1	1	0	0	0	0	0
Kctd10	0.927253		-0.047083	0.18546	0	0	0.231875	0.324903	0	0	0	0	0	0	0	0	0	0	0	0	0	0	0
Psg22	0.927208	0.669959	-0.64771	0.18317	0	1	0.41374	0.0264625	0	0	0	0	0	1	1	1	1	1	1	1	1	1	1
Tmem63a	0.927205	8.42041	-0.50376	0.21699	-1	0	0.0236437	0.285293	-1	-1	-1	-1	-1	-1	-1	-1	-1	-1	0	0	0	0	0
Ndufb10	0.927184	2.03452	-0.19376	-0.041951	0	-1	0.308738	0.0364354	0	0	0	0	0	-1	-1	-1	-1	-1	-1	-1	-1	-1	-1
Saa2	0.92716	2.68014	1.8516	-0.0035165	1	0	0.0319068	0.458691	1	1	1	1	1	1	0	1	0	1	0	0	0	0	0
Tcstv3	0.927147	0.153258	-1.6013	0.1459	0	1	0.375795	0.0242348	0	0	1	1	0	1	1	1	1	1	1	1	1	1	1
Ctns	0.927141	3.74258	-0.39709	0.066269	-1	0	0.0263859	0.388633	-1	-1	-1	-1	-1	-1	-1	-1	-1	-1	0	0	0	0	0
Dcp1b	0.927127	2.56805	-0.43362	0.059907	-1	1	0.0490316	0.0276887	-1	-1	-1	-1	-1	1	1	1	-1	1	1	1	1	1	1
Slc39a14	0.927118	3.65518	0.80646	-0.07074	1	0	0.0240648	0.454517	1	1	1	1	1	1	1	1	1	1	0	0	0	0	0
Ptgir	0.927103	1.27072	-0.57399	0.15674	0	1	0.245884	0.0252438	0	0	0	0	0	1	1	1	1	1	1	1	1	1	1
Gbp10	0.927062	3.19888	0.95432	-0.10497	1	-1	0.0258388	0.0576419	1	1	1	1	1	1	1	1	1	-1	-1	-1	-1	-1	-1
Parp3	0.927009	NA	0.0759687	NA	1	NA	5.64725e-09	NA	1	1	1	1	1	1	1	1	1	1	1	1	1	1	1
Eif2c4	0.927007	2.84081	-0.74828	0.049366	-1	1	0.0282951	0.0614403	-1	-1	-1	-1	-1	-1	1	-1	1	-1	1	1	1	1	1
Gm4951	0.926983	2.707	0.82415	-0.036239	1	-1	0.0317865	0.0810618	1	1	1	1	1	1	1	-1	-1	-1	-1	-1	-1	-1	-1
Mup2	0.92695	NA	-0.0810585	NA	-1	NA	5.67719e-09	NA	-1	-1	-1	-1	-1	-1	-1	-1	-1	-1	-1	-1	-1	-1	-1
Ccbl2	0.926943	NA	-0.0539855	NA	-1	NA	5.68069e-09	NA	-1	-1	-1	-1	-1	-1	-1	-1	-1	-1	-1	-1	-1	-1	-1
Ntn3	0.926934	15.1368	-0.23037	0.20243	-1	0	0.0564505	0.325858	-1	-1	-1	-1	-1	-1	-1	-1	-1	-1	0	0	0	0	0
Lrrc32	0.926911	4.16627	-0.64582	0.16542	-1	0	0.0326815	0.394694	-1	-1	-1	-1	-1	-1	-1	-1	-1	-1	0	0	0	0	0
Nme3	0.926898	20.8051	-0.1724	0.68482	-1	1	0.0561853	0.0967751	-1	-1	-1	-1	-1	-1	-1	-1	-1	-1	1	1	1	1	1
Mtif3	0.92689	2.78055	-0.91379	0.090267	-1	1	0.0290602	0.0414061	-1	-1	-1	-1	-1	-1	1	-1	-1	1	1	1	1	1	1
Ier5l	0.926847	3.03609	-0.092123	0.091845	0	1	0.194418	0.0338614	0	0	0	0	0	0	0	1	1	0	1	1	1	1	1
S1pr2	0.926822	24.0262	0.079361	-1.1075	1	0	0.0302871	0.167149	1	1	1	1	1	1	1	1	1	1	0	0	1	1	0
1700019G17Rik	0.926801	2.31488	-0.12587	0.08222	0	1	0.339725	0.0256394	0	0	0	0	0	1	1	1	1	1	1	1	1	1	1
Zfp108	0.926757	3.61614	-0.79446	0.10023	-1	0	0.0243943	0.407676	-1	-1	-1	-1	-1	-1	-1	-1	-1	-1	0	0	0	0	0
Ccdc126	0.926737	3.26626	-0.34401	0.091152	-1	1	0.0446592	0.039579	-1	-1	-1	-1	-1	-1	-1	1	-1	-1	1	1	1	1	1
Tgfa	0.926697	2.88097	0.70901	-0.035737	0	-1	0.152289	0.0628122	0	0	0	0	0	-1	-1	-1	-1	-1	-1	-1	-1	-1	-1
Fam125b	0.926587	3.88061	-0.57959	0.090152	-1	0	0.0246621	0.421976	-1	-1	-1	-1	-1	-1	-1	-1	-1	-1	0	0	0	0	0
1200009I06Rik	0.926581	20.1057	0.16986	-0.47913	1	0	0.0737879	0.149023	1	1	1	1	1	1	1	1	1	1	0	0	0	0	0
Zfp51	0.926551	13.3489	-0.19899	0.31936	-1	0	0.0534518	0.167647	-1	-1	-1	-1	-1	-1	-1	-1	-1	-1	0	0	0	0	0
Slc10a5	0.926547	6.96759	-0.28858	-0.017194	-1	0	0.0620709	0.484122	-1	-1	-1	-1	-1	-1	-1	-1	-1	-1	0	0	0	0	0
Stk4	0.926544	10.5699	-0.13157	0.17686	-1	0	0.081372	0.431924	-1	-1	-1	-1	-1	-1	-1	-1	-1	-1	0	0	0	0	0
Niacr1	0.92648	7.91414	2.0045	-0.68408	1	0	0.0245577	0.342266	1	1	1	1	1	1	1	1	1	1	0	0	0	0	0
Cyp2a4	0.926456	24.4176	-0.099793	6.5238	-1	0	0.0265065	0.11239	-1	-1	-1	-1	-1	-1	-1	-1	-1	-1	-1	-1	-1	0	0
Rasal3	0.926447	NA	0.121044	NA	1	NA	5.9374e-09	NA	1	1	1	1	1	1	1	1	1	1	1	1	1	1	1
2810468N07Rik	0.926415	12.9077	-0.6436	0.80698	-1	0	0.0319384	0.182897	-1	-1	-1	-1	-1	-1	-1	-1	-1	-1	0	0	0	0	0
Egr2	0.926308	2.66745	2.3927	-0.090527	1	-1	0.0429894	0.0909189	1	1	1	1	1	-1	-1	-1	1	-1	-1	-1	-1	-1	-1
Adcy6	0.926295	2.59106	-0.46811	0.058811	-1	1	0.0470142	0.0291691	-1	-1	-1	-1	-1	1	1	1	-1	1	1	1	1	1	1
Rinl	0.926277	2.74601	-0.54072	0.15652	-1	1	0.0652051	0.0275144	-1	-1	-1	-1	-1	1	1	-1	1	-1	1	1	1	1	1
1190002H23Rik	0.926272	3.47656	1.1788	0.035204	1	0	0.0339052	0.488959	1	1	1	1	1	1	1	1	1	1	0	0	0	0	0
Trip13	0.926267	11.1839	-0.48576	0.56057	-1	0	0.0530485	0.229552	-1	-1	-1	-1	-1	-1	-1	-1	-1	-1	0	0	0	0	0
Cbfb	0.926239	2.88605	-0.14551	0.063629	0	1	0.128371	0.02602	0	0	0	0	0	0	1	1	1	1	1	1	1	1	1
Hcfc1r1	0.926226	NA	-0.0545437	NA	-1	NA	6.05463e-09	NA	-1	-1	-1	-1	-1	-1	-1	-1	-1	-1	-1	-1	-1	-1	-1
AV356131	0.926213	3.18141	-0.51376	0.055055	-1	1	0.0292627	0.0430542	-1	-1	-1	-1	-1	-1	-1	1	-1	1	1	1	1	1	1
Stap2	0.926106	3.02843	0.58935	-0.058531	1	-1	0.0327308	0.0408967	1	1	1	1	1	-1	-1	1	1	-1	-1	-1	-1	-1	-1
Cep57l1	0.926084	2.82991	-0.41738	0.058425	-1	1	0.0365361	0.0313057	-1	-1	-1	-1	-1	-1	1	1	1	-1	1	1	1	1	1
Tusc1	0.926062	2.52046	-0.48942	0.067002	-1	1	0.0471054	0.0284566	-1	-1	-1	-1	-1	1	1	1	1	-1	1	1	1	1	1
Cd28	0.926028	NA	0.126901	NA	1	NA	6.16158e-09	NA	1	1	1	1	1	1	1	1	1	1	1	1	1	1	1
Dbndd2	0.926026	3.25911	-0.2999	0.084843	-1	1	0.0539236	0.0299631	-1	-1	-1	-1	-1	-1	-1	-1	1	1	1	1	1	1	1
5730508B09Rik	0.926026	10.5844	0.84973	-0.5858	1	0	0.0238917	0.229358	1	1	1	1	1	1	1	1	1	1	0	0	0	0	0
Olfr1443	0.92602	2.6879	-0.48004	-0.031369	0	-1	0.190046	0.0689971	0	0	0	0	0	-1	-1	-1	-1	-1	-1	-1	-1	-1	-1
Tnfaip8l2	0.925983	3.68044	-0.7102	0.18452	-1	0	0.0373478	0.43849	-1	-1	-1	-1	-1	-1	-1	-1	-1	-1	0	0	0	0	0
Prkag2	0.925942	8.63492	0.14708	-0.15336	1	0	0.080482	0.353915	1	1	1	1	1	1	1	1	1	1	0	0	0	0	0
Map4k1	0.92594	NA	0.121809	NA	1	NA	6.20983e-09	NA	1	1	1	1	1	1	1	1	1	1	1	1	1	1	1
Bmp5	0.925931	2.94725	-0.50082	0.022959	-1	1	0.0323866	0.0840613	-1	-1	-1	-1	-1	1	-1	-1	1	1	1	1	1	1	1
Eps8	0.925924	3.66795	-0.35129	0.10243	-1	0	0.0410051	0.398195	-1	-1	-1	-1	-1	-1	-1	-1	-1	-1	0	0	0	0	0
Slc2a3	0.925891	2.66239	0.95352	0.096536	0	1	0.230429	0.053499	0	0	0	0	0	1	1	1	1	1	1	1	1	1	1
Ccl9	0.925867	2.90189	0.76409	-0.10478	1	-1	0.0360968	0.0317564	1	1	1	1	1	1	1	-1	-1	-1	-1	-1	-1	-1	-1
Cd37	0.925855	NA	0.0911408	NA	1	NA	6.25631e-09	NA	1	1	1	1	1	1	1	1	1	1	1	1	1	1	1
Basp1	0.925849	3.86909	0.17894	0.056702	1	0	0.0721542	0.438202	1	1	1	1	1	1	1	1	1	1	0	0	0	0	0
Cbx6	0.925827	2.67394	-0.6001	0.082235	-1	1	0.0494579	0.0281926	-1	-1	-1	-1	-1	1	1	-1	1	1	1	1	1	1	1
Tmem56	0.925823	5.47318	0.21599	-0.12057	1	0	0.0574075	0.358758	1	1	1	1	1	1	1	1	1	1	0	0	0	0	0
Pfkfb2	0.925806	12.1808	-0.21811	0.29914	-1	0	0.0549929	0.236069	-1	-1	-1	-1	-1	-1	-1	-1	-1	-1	0	0	0	0	0
Mtmr12	0.925797	2.8328	0.46183	-0.070489	1	-1	0.038386	0.0304199	1	1	1	1	1	-1	-1	1	-1	1	-1	-1	-1	-1	-1
Rnf24	0.92575	2.58722	-0.3549	0.081627	-1	1	0.0740154	0.0253783	-1	-1	-1	-1	-1	1	1	1	-1	1	1	1	1	1	1
Zfp78	0.925622	3.406	-0.92236	0.16033	-1	1	0.0396388	0.0298762	-1	-1	-1	-1	-1	-1	1	1	1	-1	1	1	1	1	1
[truncated: 2,399 more rows]
