# Supplementary material for: Identification and characterization of dynamically regulated hepatitis-related genes in a concanavalin A-induced liver injury model
Source: Aging (Albany NY). 2020 Nov 18;12(22):23187–99. doi: 10.18632/aging.104089 (PMC7746381; doi:10.18632/aging.104089)
Supplement: Supplementary Table 2 [file aging-12-104089-s003..xlsx]

## Sheet: WGCNA
ID	moduleColor	MEblue	MEbrown	MEturquoise	MEgrey	kTotal	kWithin	kOut	kDiff	GS.0h	p.GS.0h	GS.3h	p.GS.3h	GS.24h	p.GS.24h	MM.turquoise	p.MM.turquoise	MM.blue	p.MM.blue	MM.brown	p.MM.brown	MM.grey	p.MM.grey
5033411D12Rik	blue	-0.763767	-0.172046	-0.897885	-0.0437813	1643.97	668.626	975.345	-306.719	0.423111	0.116087	0.563325	0.028763	-0.986437	1.37911e-11	-0.897885	5.55281e-06	-0.763767	0.000919112	-0.172046	0.539793	-0.0437813	0.876879
Ptgis	blue	0.788568	0.134359	0.882868	0.10074	1640.06	734.379	905.686	-171.307	-0.395651	0.144353	-0.58831	0.0210592	0.983962	4.07593e-11	0.882868	1.30489e-05	0.788568	0.000476883	0.134359	0.633076	0.10074	0.720921
Rras	blue	0.803446	0.107826	0.866281	0.0722462	1599.75	762.898	836.851	-73.9533	-0.373871	0.169821	-0.607711	0.016254	0.981581	9.96225e-11	0.866281	2.96055e-05	0.803446	0.000308439	0.107826	0.702092	0.0722462	0.798053
Selplg	blue	0.764948	0.179926	0.904727	0.120135	1680.93	692.34	988.589	-296.249	-0.434658	0.105433	-0.546635	0.0349841	0.981292	1.10156e-10	0.904727	3.59823e-06	0.764948	0.000892423	0.179926	0.521091	0.120135	0.669768
Tmem45a	blue	0.778702	0.155936	0.888916	0.140139	1643.77	712.586	931.186	-218.6	-0.412261	0.126755	-0.568537	0.0270035	0.980798	1.30339e-10	0.888916	9.38575e-06	0.778702	0.000625167	0.155936	0.578925	0.140139	0.618385
Cmtm2a	blue	0.811687	0.105537	0.869021	0.110705	1660.91	803.106	857.803	-54.6968	-0.366992	0.178442	-0.613748	0.0149464	0.98074	1.32924e-10	0.869021	2.6056e-05	0.811687	0.000238499	0.105537	0.708159	0.110705	0.694486
BC048507	blue	0.80173	0.102156	0.859138	0.0673685	1587.82	759.867	827.954	-68.0873	-0.359994	0.1875	-0.618285	0.0140185	0.978279	2.88745e-10	0.859138	4.07813e-05	0.80173	0.000324925	0.102156	0.717148	0.0673685	0.811454
Vasp	blue	0.776537	0.163182	0.898524	0.114668	1675.43	714.937	960.492	-245.555	-0.417496	0.121528	-0.560637	0.0297037	0.978133	3.01457e-10	0.898524	5.33921e-06	0.776537	0.000662256	0.163182	0.56118	0.114668	0.684063
Coro1a	blue	0.800231	0.116381	0.870695	0.113593	1633.68	768.892	864.792	-95.9002	-0.375367	0.167983	-0.602452	0.0174631	0.97782	3.30408e-10	0.870695	2.40673e-05	0.800231	0.000339909	0.116381	0.679573	0.113593	0.686886
Glul	blue	-0.814425	-0.0795581	-0.853641	-0.0504923	1576.04	776.025	800.011	-23.9859	0.345394	0.207345	0.632171	0.0114527	-0.977565	3.55624e-10	-0.853641	5.15806e-05	-0.814425	0.000218378	-0.0795581	0.778064	-0.0504923	0.858171
Skap1	blue	0.7633	0.170233	0.883921	0.0556742	1605.35	680.337	925.012	-244.676	-0.422063	0.11709	-0.555217	0.031671	0.97728	3.85803e-10	0.883921	1.23373e-05	0.7633	0.000929836	0.170233	0.54414	0.0556742	0.843772
Clic1	blue	0.811741	0.104868	0.866905	0.0989033	1664.07	809.013	855.058	-46.0452	-0.363238	0.183264	-0.613956	0.0149028	0.977194	3.95278e-10	0.866905	2.87636e-05	0.811741	0.000238092	0.104868	0.709934	0.0989033	0.725828
Nucb2	blue	0.771473	0.153848	0.878326	0.0729234	1592.49	695.211	897.284	-202.073	-0.407039	0.132121	-0.569772	0.0265989	0.976811	4.40094e-10	0.878326	1.65209e-05	0.771473	0.000756003	0.153848	0.58408	0.0729234	0.796197
Gm6788	blue	0.805532	0.0952438	0.85806	0.0695354	1585.61	766.22	819.395	-53.1744	-0.352953	0.19691	-0.623553	0.0129976	0.976505	4.78832e-10	0.85806	4.27362e-05	0.805532	0.000289334	0.0952438	0.735631	0.0695354	0.805494
Stk24	blue	0.781547	0.155418	0.887155	0.0680965	1662.04	729.936	932.101	-202.166	-0.402904	0.136478	-0.573586	0.0253778	0.97649	4.80871e-10	0.887155	1.03507e-05	0.781547	0.000579007	0.155418	0.580201	0.0680965	0.80945
Pycard	blue	0.781748	0.142859	0.89499	0.10466	1628.15	701.584	926.568	-224.983	-0.402326	0.137094	-0.574	0.0252479	0.976327	5.028e-10	0.89499	6.61137e-06	0.781748	0.00057586	0.142859	0.611517	0.10466	0.710485
Gm14085	blue	0.774272	0.160447	0.893864	0.0711994	1648.57	704.236	944.332	-240.096	-0.40886	0.130232	-0.567088	0.0274843	0.975948	5.56853e-10	0.893864	7.06614e-06	0.774272	0.000702935	0.160447	0.56785	0.0711994	0.800925
E2f4	blue	0.746007	0.189286	0.909439	0.0471054	1607.29	617.034	990.259	-373.225	-0.43857	0.101983	-0.537376	0.0388423	0.975946	5.57207e-10	0.909439	2.61804e-06	0.746007	0.00140495	0.189286	0.499263	0.0471054	0.867604
Mapk7	blue	0.768403	0.171141	0.905946	0.113935	1660.75	681.091	979.662	-298.57	-0.422921	0.116268	-0.552733	0.0326046	0.975654	6.0227e-10	0.905946	3.31947e-06	0.768403	0.000817897	0.171141	0.54196	0.113935	0.685985
Dgkd	blue	0.796583	0.12954	0.875331	0.0782497	1631.58	755.236	876.344	-121.108	-0.3837	0.157986	-0.591907	0.0200953	0.975607	6.09763e-10	0.875331	1.92051e-05	0.796583	0.000378746	0.12954	0.645424	0.0782497	0.781632
Anxa2	blue	0.828087	0.0684616	0.844017	0.0651747	1617.45	840.081	777.364	62.7176	-0.333374	0.22465	-0.641949	0.00987716	0.975323	6.56974e-10	0.844017	7.61509e-05	0.828087	0.000137577	0.0684616	0.808446	0.0651747	0.817496
Chchd6	blue	0.772851	0.140411	0.883459	0.082341	1542.74	662.195	880.547	-218.352	-0.405612	0.133613	-0.569462	0.0267	0.975074	7.00829e-10	0.883459	1.26453e-05	0.772851	0.000729489	0.140411	0.617698	0.082341	0.77049
Pafah1b3	blue	0.823003	0.0778928	0.846391	0.03326	1609.88	826.167	783.71	42.4577	-0.340996	0.213574	-0.634075	0.0111317	0.975071	7.01464e-10	0.846391	6.93408e-05	0.823003	0.000164122	0.0778928	0.782606	0.03326	0.906328
Nlgn2	blue	0.77012	0.158168	0.880934	0.0163905	1571.58	673.646	897.932	-224.286	-0.406226	0.132969	-0.568828	0.0269079	0.975054	7.04453e-10	0.880934	1.44442e-05	0.77012	0.000782798	0.158168	0.573433	0.0163905	0.953768
Cmtm4	blue	0.802153	0.108331	0.868158	0.0721287	1591.94	751.206	840.732	-89.5256	-0.364163	0.182069	-0.610792	0.0155761	0.974954	7.22837e-10	0.868158	2.71334e-05	0.802153	0.000320795	0.108331	0.700757	0.0721287	0.798375
Rabl5	blue	0.816687	0.0910789	0.855571	0.13455	1610.97	804.117	806.857	-2.74061	-0.351812	0.198463	-0.623119	0.0130794	0.974931	7.27149e-10	0.855571	4.75489e-05	0.816687	0.000202819	0.0910789	0.746834	0.13455	0.632589
Whsc1	blue	0.812928	0.0909771	0.860878	0.0879541	1601.74	781.257	820.486	-39.2297	-0.345826	0.206738	-0.628471	0.0120974	0.974297	8.5396e-10	0.860878	3.77807e-05	0.812928	0.000229203	0.0909771	0.747109	0.0879541	0.755271
Rad54l	blue	0.759817	0.178817	0.895791	0.0491343	1622.2	669.539	952.666	-283.127	-0.427693	0.111774	-0.546347	0.0350995	0.97404	9.10541e-10	0.895791	6.30297e-06	0.759817	0.00101314	0.178817	0.523704	0.0491343	0.861951
Rtn1	blue	-0.749514	-0.151208	-0.865696	-0.098203	1412.89	592.816	820.071	-227.256	0.416307	0.122702	0.557395	0.0308691	-0.973702	9.89626e-10	-0.865696	3.04125e-05	-0.749514	0.00129552	-0.151208	0.590626	-0.098203	0.727701
1500012F01Rik	blue	0.77062	0.159148	0.876537	0.0294767	1560.18	679.042	881.133	-202.091	-0.407503	0.131638	-0.566161	0.0277955	0.973663	9.98974e-10	0.876537	1.80838e-05	0.77062	0.000772817	0.159148	0.57103	0.0294767	0.916947
Plp2	blue	0.830062	0.070917	0.850292	0.0847206	1645.57	852.307	793.266	59.0408	-0.335098	0.222114	-0.638565	0.010402	0.973663	9.99018e-10	0.850292	5.92486e-05	0.830062	0.000128268	0.070917	0.8017	0.0847206	0.764028
Cep192	blue	0.752612	0.190788	0.898714	0.0826838	1621.51	653.936	967.574	-313.638	-0.437047	0.103316	-0.536421	0.0392577	0.973468	1.04769e-09	0.898714	5.27716e-06	0.752612	0.00120464	0.190788	0.495801	0.0826838	0.769558
Zfp296	blue	0.804708	0.102626	0.86069	0.0634586	1590.66	761.294	829.364	-68.0698	-0.354308	0.195076	-0.619064	0.0138635	0.973373	1.07209e-09	0.86069	3.80962e-05	0.804708	0.000296758	0.102626	0.715896	0.0634586	0.82223
Ralb	blue	0.814789	0.09571	0.859458	0.0650105	1623.36	798.121	825.24	-27.1185	-0.351975	0.198241	-0.620871	0.0135099	0.972845	1.21635e-09	0.859458	4.02143e-05	0.814789	0.000215807	0.09571	0.73438	0.0650105	0.817949
2610029G23Rik	blue	0.783222	0.11554	0.855238	0.00262533	1485.79	679.259	806.531	-127.273	-0.373685	0.17005	-0.599155	0.0182558	0.97284	1.21784e-09	0.855238	4.82242e-05	0.783222	0.00055317	0.11554	0.681777	0.00262533	0.992591
Mgst2	blue	0.769533	0.159028	0.887649	0.0898932	1587.61	680.295	907.317	-227.023	-0.414079	0.124922	-0.558536	0.0304551	0.972615	1.28417e-09	0.887649	1.00717e-05	0.769533	0.000794667	0.159028	0.571324	0.0898932	0.750032
Ncf1	blue	0.755877	0.183163	0.892411	0.100797	1604.46	663.359	941.102	-277.743	-0.426254	0.113117	-0.546318	0.0351111	0.972572	1.29736e-09	0.892411	7.69158e-06	0.755877	0.00111455	0.183163	0.513492	0.100797	0.720771
Lhpp	blue	-0.788231	-0.116348	-0.855988	-0.0644522	1509.22	709.175	800.046	-90.871	0.380132	0.162218	0.592207	0.0200163	-0.972339	1.36984e-09	-0.855988	4.67122e-05	-0.788231	0.000481426	-0.116348	0.679658	-0.0644522	0.819489
Gm71	blue	0.819722	0.0778718	0.842306	0.0803051	1592.85	814.239	778.61	35.6291	-0.33638	0.22024	-0.635868	0.0108357	0.972248	1.39924e-09	0.842306	8.13908e-05	0.819722	0.000183389	0.0778718	0.782663	0.0803051	0.77603
Mcm6	blue	0.782714	0.133372	0.859524	0.144107	1549.36	714.757	834.599	-119.842	-0.386112	0.155168	-0.585945	0.0217119	0.972057	1.46211e-09	0.859524	4.00996e-05	0.782714	0.000560902	0.133372	0.635598	0.144107	0.608376
Sgcb	blue	0.768529	0.170061	0.892087	0.122358	1631.12	694.282	936.842	-242.559	-0.416959	0.122056	-0.554798	0.031827	0.971757	1.56607e-09	0.892087	7.83671e-06	0.768529	0.000815277	0.170061	0.544553	0.122358	0.663986
Galnt12	blue	0.828198	0.0735856	0.85722	0.13887	1639.88	837.154	802.725	34.4294	-0.337842	0.218114	-0.633844	0.0111701	0.971687	1.59134e-09	0.85722	4.4313e-05	0.828198	0.000137041	0.0735856	0.794383	0.13887	0.6216
Sema3f	blue	0.80772	0.105784	0.860415	0.138915	1614.44	786.781	827.656	-40.8747	-0.360695	0.186579	-0.610548	0.0156289	0.971243	1.75872e-09	0.860415	3.85603e-05	0.80772	0.00027034	0.105784	0.707502	0.138915	0.621487
Mre11a	blue	0.850994	0.0269948	0.828075	0.0610963	1616.34	897.493	718.849	178.644	-0.298238	0.280286	-0.672763	0.00598964	0.971	1.85639e-09	0.828075	0.000137636	0.850994	5.75681e-05	0.0269948	0.92392	0.0610963	0.828756
Cyp2j9	blue	-0.78456	-0.113668	-0.868379	-0.0303743	1487.16	669.966	817.194	-147.228	0.375976	0.167238	0.594856	0.0193306	-0.970832	1.92687e-09	-0.868379	2.6855e-05	-0.78456	0.00053321	-0.113668	0.686689	-0.0303743	0.914426
Tnfaip8	blue	0.825398	0.0773889	0.850213	0.0792291	1627.95	836.323	791.622	44.7006	-0.336853	0.219551	-0.633777	0.0111813	0.97063	2.01406e-09	0.850213	5.94392e-05	0.825398	0.00015114	0.0773889	0.783982	0.0792291	0.778961
Flna	blue	0.734405	0.207053	0.888342	0.0968061	1546.4	614.565	931.835	-317.27	-0.45433	0.0888843	-0.516248	0.0488244	0.970578	2.03711e-09	0.888342	9.69182e-06	0.734405	0.00182128	0.207053	0.459041	0.0968061	0.731441
Fam160a2	blue	0.813869	0.0958802	0.856298	0.118827	1616.1	800.871	815.232	-14.3608	-0.350001	0.200944	-0.620179	0.0136444	0.97018	2.22108e-09	0.856298	4.60988e-05	0.813869	0.000222347	0.0958802	0.733923	0.118827	0.67318
Kctd17	blue	0.850393	0.0264811	0.826202	0.0647948	1599.11	887.49	711.623	175.867	-0.293923	0.287638	-0.676214	0.00564365	0.970137	2.24181e-09	0.826202	0.000146974	0.850393	5.90045e-05	0.0264811	0.925364	0.0647948	0.818544
Arhgdib	blue	0.795914	0.12792	0.875793	0.125506	1639.28	763.725	875.555	-111.83	-0.380683	0.161559	-0.589439	0.0207531	0.970122	2.24921e-09	0.875793	1.8769e-05	0.795914	0.000386242	0.12792	0.649594	0.125506	0.655826
Zfand2a	blue	0.843733	0.0462127	0.835418	0.0922092	1622.88	880.259	742.621	137.638	-0.308073	0.263953	-0.661944	0.00718377	0.970017	2.30023e-09	0.835418	0.000105597	0.843733	7.69999e-05	0.0462127	0.870094	0.0922092	0.743789
Obfc2a	blue	0.793437	0.106576	0.847871	-0.00311681	1507.41	724.374	783.04	-58.6657	-0.367609	0.177657	-0.602364	0.0174841	0.969973	2.32208e-09	0.847871	6.53566e-05	0.793437	0.000415085	0.106576	0.705403	-0.00311681	0.991204
Lilrb3	blue	0.73523	0.212599	0.903834	0.0876148	1597.35	615.514	981.84	-366.326	-0.451361	0.0912557	-0.518568	0.0476449	0.969929	2.34416e-09	0.903834	3.81482e-06	0.73523	0.00178874	0.212599	0.446824	0.0876148	0.756189
Ndufa4l2	blue	0.85265	0.0262029	0.827474	0.0680634	1619.77	901.858	717.911	183.947	-0.294826	0.28609	-0.67508	0.00575557	0.969906	2.35551e-09	0.827474	0.000140578	0.85265	5.37592e-05	0.0262029	0.926147	0.0680634	0.809541
Igsf8	blue	0.781525	0.129149	0.859479	0.053643	1519.87	697.776	822.098	-124.321	-0.377725	0.165113	-0.592132	0.0200362	0.969857	2.38049e-09	0.859479	4.01783e-05	0.781525	0.000579367	0.129149	0.64643	0.053643	0.849411
Klf4	blue	0.773694	0.146575	0.879508	0.126661	1538.35	670.22	868.135	-197.915	-0.400464	0.139094	-0.568686	0.0269544	0.96915	2.76267e-09	0.879508	1.55508e-05	0.773694	0.000713638	0.146575	0.602184	0.126661	0.652842
Mbl2	blue	-0.782565	-0.132004	-0.877638	-0.0679867	1570.56	696.725	873.837	-177.112	0.387036	0.154098	0.582032	0.0228257	-0.969068	2.81015e-09	-0.877638	1.71076e-05	-0.782565	0.000563184	-0.132004	0.639099	-0.0679867	0.809752
Gcnt1	blue	0.800537	0.110828	0.863788	0.0914716	1586.68	758.903	827.78	-68.8774	-0.364908	0.181109	-0.603764	0.0171553	0.968671	3.04998e-09	0.863788	3.31726e-05	0.800537	0.000336811	0.110828	0.694162	0.0914716	0.745776
1110007C09Rik	blue	0.785292	0.121856	0.853968	0.0719303	1510.35	710.251	800.097	-89.8454	-0.374072	0.169573	-0.594439	0.0194374	0.968511	3.15169e-09	0.853968	5.08792e-05	0.785292	0.000522528	0.121856	0.665289	0.0719303	0.798919
Tacc3	blue	0.775803	0.136062	0.857156	0.122807	1521.26	696.678	824.577	-127.899	-0.388804	0.152063	-0.579531	0.0235601	0.968336	3.26616e-09	0.857156	4.44352e-05	0.775803	0.00067522	0.136062	0.628735	0.122807	0.66282
Mcm5	blue	0.759182	0.167979	0.878843	0.219378	1530.32	651.478	878.84	-227.362	-0.417177	0.121842	-0.550612	0.0334179	0.967789	3.64571e-09	0.878843	1.60907e-05	0.759182	0.00102897	0.167979	0.549562	0.219378	0.432115
Esyt1	blue	0.848219	0.0391695	0.833965	0.105451	1628.88	895.643	733.236	162.407	-0.303735	0.271084	-0.663798	0.0069669	0.967533	3.8358e-09	0.833965	0.000111391	0.848219	6.44481e-05	0.0391695	0.889771	0.105451	0.708387
Ift57	blue	0.823806	0.0812255	0.861572	0.0354438	1633.07	821.569	811.505	10.0638	-0.340852	0.213781	-0.626591	0.0124355	0.967443	3.90451e-09	0.861572	3.6637e-05	0.823806	0.00015967	0.0812255	0.773524	0.0354438	0.900205
Chpf	blue	0.785003	0.104108	0.837785	0.0691047	1443.47	692.368	751.101	-58.7335	-0.362877	0.183733	-0.604322	0.0170255	0.967199	4.09662e-09	0.837785	9.66905e-05	0.785003	0.000526729	0.104108	0.711953	0.0691047	0.806678
Anp32b	blue	0.853806	0.0301322	0.832611	0.063321	1645.26	911.21	734.054	177.156	-0.291797	0.291303	-0.67522	0.00574159	0.967017	4.24451e-09	0.832611	0.000117029	0.853806	5.12255e-05	0.0301322	0.915106	0.063321	0.82261
Gpx3	blue	0.789497	0.122306	0.868347	0.0336458	1559.53	711.672	847.853	-136.181	-0.369991	0.174649	-0.596924	0.0188077	0.966915	4.32969e-09	0.868347	2.68948e-05	0.789497	0.000464543	0.122306	0.66412	0.0336458	0.905246
H2-T24	blue	0.742049	0.20154	0.898274	0.15004	1554.38	612.6	941.783	-329.182	-0.4404	0.100397	-0.526319	0.0438556	0.966718	4.49744e-09	0.898274	5.42187e-06	0.742049	0.00153728	0.20154	0.471348	0.15004	0.593531
Kctd10	blue	0.779468	0.141209	0.879758	-0.0176076	1558.43	688.041	870.389	-182.348	-0.39177	0.148691	-0.574853	0.024982	0.966622	4.58134e-09	0.879758	1.53518e-05	0.779468	0.000612461	0.141209	0.61568	-0.0176076	0.950338
Ier5l	blue	0.793395	0.113912	0.868563	0.125778	1535.79	720.695	815.094	-94.3989	-0.375919	0.167308	-0.590642	0.0204303	0.966561	4.63551e-09	0.868563	2.66234e-05	0.793395	0.000415584	0.113912	0.686046	0.125778	0.655124
Gpnmb	blue	0.799542	0.0886457	0.855215	0.0535587	1480.34	708.382	771.962	-63.5799	-0.352236	0.197885	-0.613867	0.0149215	0.966102	5.05925e-09	0.855215	4.82717e-05	0.799542	0.000346983	0.0886457	0.753401	0.0535587	0.849645
Ubl4	blue	0.797359	0.0735773	0.832495	0.0933516	1399.19	689.258	709.93	-20.6718	-0.339932	0.215099	-0.626153	0.0125154	0.966085	5.07576e-09	0.832495	0.000117518	0.797359	0.000370201	0.0735773	0.794405	0.0933516	0.740715
Emilin2	blue	0.7656	0.144304	0.868022	0.102358	1475.18	651.093	824.084	-172.991	-0.399226	0.140434	-0.56682	0.0275741	0.966046	5.1137e-09	0.868022	2.73073e-05	0.7656	0.000877943	0.144304	0.607882	0.102358	0.71661
Gng2	blue	0.82594	0.076705	0.846922	0.143087	1611.77	835.596	776.174	59.4219	-0.331469	0.227474	-0.634566	0.01105	0.966034	5.12485e-09	0.846922	6.78902e-05	0.82594	0.000148318	0.076705	0.78585	0.143087	0.610942
Gm22	blue	0.754941	0.169784	0.903082	0.124758	1564.36	618.701	945.66	-326.958	-0.424569	0.114703	-0.541126	0.0372434	0.965694	5.46305e-09	0.903082	4.00534e-06	0.754941	0.0011398	0.169784	0.545218	0.124758	0.657762
Itgb2	blue	0.780011	0.14114	0.868106	0.0947985	1563.73	714.207	849.524	-135.317	-0.387363	0.15372	-0.578305	0.0239265	0.965669	5.48934e-09	0.868106	2.71994e-05	0.780011	0.000603565	0.14114	0.615856	0.0947985	0.736826
Hmgb2	blue	0.807599	0.103358	0.865044	0.111326	1610.94	781.171	829.768	-48.5964	-0.360149	0.187296	-0.605464	0.0167623	0.965614	5.54614e-09	0.865044	3.1334e-05	0.807599	0.000271357	0.103358	0.713947	0.111326	0.692851
Chtf18	blue	0.80784	0.101222	0.8638	0.0703654	1611.84	783.445	828.396	-44.951	-0.353237	0.196525	-0.612334	0.0152451	0.96557	5.59101e-09	0.8638	3.31548e-05	0.80784	0.000269323	0.101222	0.719635	0.0703654	0.803214
Gimap7	blue	0.775121	0.134899	0.865363	0.0171117	1487.38	668.752	818.633	-149.881	-0.384997	0.156467	-0.580352	0.0233173	0.965349	5.82612e-09	0.865363	3.08797e-05	0.775121	0.000687462	0.134899	0.631699	0.0171117	0.951735
Tbcb	blue	0.861988	0.010392	0.827438	0.119499	1619.66	920.28	699.376	220.905	-0.280682	0.310903	-0.684416	0.00488458	0.965098	6.10188e-09	0.827438	0.000140757	0.861988	3.5965e-05	0.010392	0.970679	0.119499	0.671426
Rcc2	blue	0.85271	0.0156051	0.816807	0.0503675	1579.13	894.263	684.864	209.399	-0.283566	0.305745	-0.68146	0.00514821	0.965026	6.18283e-09	0.816807	0.000202021	0.85271	5.36238e-05	0.0156051	0.955981	0.0503675	0.858518
Hist1h2ag	blue	0.810127	0.0860986	0.844342	0.0759424	1544.09	777.842	766.25	11.592	-0.346013	0.206477	-0.618944	0.0138873	0.964958	6.26117e-09	0.844342	7.51866e-05	0.810127	0.000250631	0.0860986	0.760293	0.0759424	0.787934
Anxa5	blue	0.795035	0.106764	0.846313	0.00670021	1524.7	739.396	785.306	-45.9101	-0.360993	0.186189	-0.60395	0.017112	0.964943	6.2784e-09	0.846313	6.95568e-05	0.795035	0.000396289	0.106764	0.704905	0.00670021	0.981093
Gpatch3	blue	0.758336	0.14585	0.856372	0.0415136	1422.08	620.38	801.702	-181.322	-0.392859	0.147465	-0.571734	0.0259654	0.964593	6.69148e-09	0.856372	4.5953e-05	0.758336	0.00105034	0.14585	0.603999	0.0415136	0.883215
Rad51ap1	blue	0.780472	0.125443	0.861781	-0.047907	1491.89	684.191	807.695	-123.504	-0.379565	0.162896	-0.585023	0.0219706	0.964588	6.69697e-09	0.861781	3.6297e-05	0.780472	0.000596107	0.125443	0.65599	-0.047907	0.86537
Ppp3cc	blue	0.752268	0.172269	0.888039	0.100538	1489.51	606.882	882.627	-275.745	-0.430386	0.109292	-0.534085	0.0402874	0.96447	6.84089e-09	0.888039	9.85621e-06	0.752268	0.00121449	0.172269	0.539262	0.100538	0.721462
Tctex1d2	blue	0.835937	0.0353681	0.824969	0.0469762	1498.93	814.653	684.277	130.376	-0.310427	0.260132	-0.654008	0.00817296	0.964435	6.8844e-09	0.824969	0.000153401	0.835937	0.000103589	0.0353681	0.900417	0.0469762	0.867965
Gm8369	blue	0.750508	0.175939	0.886316	0.0777696	1520.77	623.604	897.17	-273.566	-0.422214	0.116945	-0.541906	0.036917	0.964119	7.28644e-09	0.886316	1.08384e-05	0.750508	0.00126578	0.175939	0.530517	0.0777696	0.782942
1700019G17Rik	blue	0.789458	0.098506	0.84244	0.0810422	1392.62	673.729	718.896	-45.1669	-0.368535	0.176484	-0.595544	0.0191554	0.964079	7.33961e-09	0.84244	8.09694e-05	0.789458	0.000465054	0.098506	0.72689	0.0810422	0.774023
Naaladl2	blue	-0.773052	-0.131065	-0.862396	-0.100833	1456.4	650.085	806.318	-156.232	0.381515	0.160568	0.582338	0.0227371	-0.963854	7.63933e-09	-0.862396	3.53147e-05	-0.773052	0.000725692	-0.131065	0.641507	-0.100833	0.720674
Oas1c	blue	0.790612	0.100564	0.84255	-0.00885705	1460.61	697.959	762.653	-64.6939	-0.350775	0.199881	-0.613022	0.0150992	0.963797	7.7163e-09	0.84255	8.06253e-05	0.790612	0.000450078	0.100564	0.721391	-0.00885705	0.975008
Itga6	blue	0.8554	0.0103221	0.815376	0.0561126	1575.99	897.237	678.756	218.481	-0.27599	0.319401	-0.68731	0.00463698	0.9633	8.42125e-09	0.815376	0.000211719	0.8554	4.78956e-05	0.0103221	0.970876	0.0561126	0.842556
9530053H05Rik	blue	0.790167	0.121218	0.866984	0.0795275	1528.35	711.543	816.803	-105.26	-0.378952	0.163633	-0.58423	0.0221948	0.963182	8.59586e-09	0.866984	2.86588e-05	0.790167	0.000455808	0.121218	0.666948	0.0795275	0.778148
Slc1a2	blue	-0.757169	-0.153336	-0.878119	-0.0953044	1463.1	620.143	842.959	-222.816	0.417142	0.121876	0.545754	0.035338	-0.962896	9.0333e-09	-0.878119	1.66956e-05	-0.757169	0.00108043	-0.153336	0.585347	-0.0953044	0.735468
Coro2a	blue	0.757514	0.176612	0.890021	0.130321	1545.73	642.609	903.118	-260.509	-0.419606	0.119463	-0.543051	0.0364416	0.962657	9.41247e-09	0.890021	8.81956e-06	0.757514	0.00107145	0.176612	0.52892	0.130321	0.643418
Bckdhb	blue	-0.852604	-0.0240839	-0.825426	-0.0971675	1593.95	894.725	699.22	195.505	0.286089	0.301275	0.676499	0.00561576	-0.962588	9.52491e-09	-0.825426	0.000150989	-0.852604	5.38609e-05	-0.0240839	0.932106	-0.0971675	0.730473
Itgb7	blue	0.862836	0.00548045	0.819374	0.115105	1601.73	924.257	677.474	246.783	-0.275096	0.321036	-0.687445	0.00462569	0.962541	9.60288e-09	0.819374	0.000185531	0.862836	3.46267e-05	0.00548045	0.984535	0.115105	0.682917
Tspan13	blue	0.733049	0.208259	0.897886	0.188611	1545.08	600.963	944.112	-343.149	-0.450361	0.0920643	-0.511743	0.0511768	0.962104	1.03429e-08	0.897886	5.5524e-06	0.733049	0.00187581	0.208259	0.456372	0.188611	0.500821
Ncs1	blue	0.840079	0.0337778	0.836784	0.0991133	1539.6	828.978	710.621	118.357	-0.306887	0.265891	-0.655037	0.00803901	0.961925	1.06611e-08	0.836784	0.000100377	0.840079	8.86559e-05	0.0337778	0.904876	0.0991133	0.725266
Cyp2b10	blue	-0.778392	-0.129583	-0.85423	-0.0524291	1450.31	671.344	778.962	-107.618	0.37673	0.16632	0.585115	0.0219446	-0.961845	1.08041e-08	-0.85423	5.03221e-05	-0.778392	0.000630364	-0.129583	0.645312	-0.0524291	0.852784
Ncapd2	blue	0.790818	0.12189	0.875472	0.128711	1554.71	713.02	841.694	-128.674	-0.382827	0.159015	-0.578553	0.0238521	0.96138	1.1676e-08	0.875472	1.90707e-05	0.790818	0.000447453	0.12189	0.665203	0.128711	0.647557
Fbxo6	blue	0.797628	0.0868246	0.822874	0.0360442	1438.16	722.288	715.867	6.42159	-0.342382	0.211598	-0.618961	0.0138839	0.961344	1.17472e-08	0.822874	0.000164847	0.797628	0.000367267	0.0868246	0.758327	0.0360442	0.898523
Hn1	blue	0.808097	0.0897379	0.841846	0.0914277	1532.58	774.079	758.506	15.5732	-0.342687	0.211165	-0.618484	0.0139787	0.961171	1.20867e-08	0.841846	8.28495e-05	0.808097	0.000267172	0.0897379	0.750452	0.0914277	0.745894
Ak1	blue	0.833422	0.0474042	0.848435	0.098413	1557.03	811.029	746	65.0286	-0.317517	0.248825	-0.643569	0.00963339	0.961086	1.2258e-08	0.848435	6.38894e-05	0.833422	0.000113625	0.0474042	0.866771	0.098413	0.727139
Arl6	blue	0.865363	-0.00735668	0.809909	0.0620631	1571.51	919.597	651.909	267.687	-0.258758	0.351739	-0.702146	0.00351921	0.960905	1.26284e-08	0.809909	0.000252371	0.865363	3.08805e-05	-0.00735668	0.979241	0.0620631	0.826084
Jakmip1	blue	0.755925	0.163854	0.878432	0.0665039	1503.89	638.343	865.543	-227.2	-0.413154	0.125853	-0.547747	0.0345405	0.960901	1.26359e-08	0.878432	1.64319e-05	0.755925	0.00111326	0.163854	0.559546	0.0665039	0.813834
5730559C18Rik	blue	0.842614	0.0256805	0.822516	0.0427507	1519.18	843.469	675.71	167.759	-0.292577	0.289955	-0.668252	0.00646682	0.960829	1.27867e-08	0.822516	0.00016687	0.842614	8.04273e-05	0.0256805	0.927615	0.0427507	0.879758
Lmnb1	blue	0.768292	0.147269	0.880606	0.140518	1505.85	652.49	853.361	-200.871	-0.401731	0.137731	-0.558882	0.0303305	0.960613	1.32444e-08	0.880606	1.46931e-05	0.768292	0.000820227	0.147269	0.600447	0.140518	0.617426
Comtd1	blue	0.735296	0.175224	0.86077	-0.0323196	1409.27	578.853	830.415	-251.562	-0.415484	0.123519	-0.545047	0.0356244	0.96053	1.34232e-08	0.86077	3.79616e-05	0.735296	0.00178617	0.175224	0.532215	-0.0323196	0.908966
Map4k4	blue	0.794607	0.113	0.847663	0.100595	1529.68	743.293	786.385	-43.0918	-0.360694	0.186581	-0.599764	0.0181075	0.960458	1.35823e-08	0.847663	6.59067e-05	0.794607	0.000401248	0.113	0.688444	0.100595	0.721309
Rac2	blue	0.788191	0.131517	0.867822	0.108833	1576.45	735.266	841.181	-105.915	-0.377721	0.165118	-0.582697	0.0226337	0.960417	1.3671e-08	0.867822	2.75633e-05	0.788191	0.000481963	0.131517	0.640348	0.108833	0.69943
Hddc2	blue	0.814957	0.064923	0.824568	0.0504846	1474.2	773.551	700.649	72.9017	-0.326617	0.234764	-0.633756	0.0111849	0.960373	1.37705e-08	0.824568	0.000155536	0.814957	0.00021463	0.064923	0.81819	0.0504846	0.858192
Trim46	blue	0.800792	0.101307	0.85561	0.0521791	1537.99	749.609	788.383	-38.7736	-0.35158	0.19878	-0.608451	0.0160889	0.960031	1.45481e-08	0.85561	4.74699e-05	0.800792	0.000334235	0.101307	0.719409	0.0521791	0.853479
Rtkn	blue	0.829538	0.051925	0.823509	0.0476721	1498.64	810.849	687.79	123.06	-0.313216	0.255647	-0.646357	0.00922491	0.959573	1.56499e-08	0.823509	0.000161308	0.829538	0.000130687	0.051925	0.854186	0.0476721	0.866025
Prickle1	blue	-0.743307	-0.131332	-0.83258	0.0743107	1263.27	555.599	707.673	-152.074	0.394752	0.145351	0.564674	0.0282998	-0.959425	1.60193e-08	-0.83258	0.000117158	-0.743307	0.0014942	-0.131332	0.640822	0.0743107	0.792397
Tpm1	blue	0.854315	-0.000140318	0.802093	0.0466007	1519.67	881.381	638.289	243.092	-0.267691	0.334755	-0.691664	0.00428331	0.959355	1.61979e-08	0.802093	0.000321381	0.854315	5.01424e-05	-0.000140318	0.999604	0.0466007	0.869011
5730416F02Rik	blue	0.766032	0.157145	0.870659	0.0585365	1515.8	671.288	844.517	-173.23	-0.405012	0.134245	-0.554242	0.0320351	0.959254	1.64579e-08	0.870659	2.41085e-05	0.766032	0.000868481	0.157145	0.575948	0.0585365	0.835839
Slc17a1	blue	-0.828587	-0.0401343	-0.820866	-0.0360496	1462.85	794.174	668.676	125.498	0.310373	0.260218	0.648812	0.00887639	-0.959186	1.66341e-08	-0.820866	0.000176468	-0.828587	0.000135171	-0.0401343	0.887072	-0.0360496	0.898507
BC014805	blue	-0.791789	-0.0769303	-0.824631	0.0400906	1336.69	667.027	669.662	-2.63548	0.352239	0.197881	0.606664	0.0164893	-0.958903	1.7386e-08	-0.824631	0.000155201	-0.791789	0.000435224	-0.0769303	0.785234	0.0400906	0.887194
Garnl3	blue	0.768495	0.120138	0.858967	0.0650674	1375.73	613.501	762.229	-148.728	-0.389319	0.151474	-0.569502	0.0266869	0.958821	1.76098e-08	0.858967	4.10856e-05	0.768495	0.000815993	0.120138	0.66976	0.0650674	0.817792
Miox	blue	0.770742	0.119164	0.863329	0.138789	1410.02	623.551	786.47	-162.919	-0.377519	0.165363	-0.581199	0.0230684	0.958718	1.78931e-08	0.863329	3.38679e-05	0.770742	0.000770395	0.119164	0.6723	0.138789	0.621805
Hpca	blue	0.762897	0.134538	0.865261	0.152093	1385.02	602.424	782.598	-180.174	-0.389001	0.151837	-0.569591	0.026658	0.958592	1.82452e-08	0.865261	3.10248e-05	0.762897	0.000939183	0.134538	0.632619	0.152093	0.588427
Fam187b	blue	0.783127	0.0797191	0.834232	0.0619202	1315.39	626.38	689.009	-62.6285	-0.345988	0.206513	-0.612441	0.0152223	0.958429	1.87112e-08	0.834232	0.00011031	0.783127	0.000554609	0.0797191	0.777626	0.0619202	0.826479
Rab19	blue	0.78577	0.118823	0.863678	0.13085	1498.41	699.124	799.291	-100.167	-0.368289	0.176795	-0.589478	0.0207425	0.957767	2.07004e-08	0.863678	3.33381e-05	0.78577	0.000515658	0.118823	0.67319	0.13085	0.642059
Lrp11	blue	0.803539	0.0916371	0.859615	0.109038	1506.54	724.676	781.86	-57.184	-0.346933	0.205192	-0.610767	0.0155815	0.9577	2.09117e-08	0.859615	3.99394e-05	0.803539	0.000307574	0.0916371	0.74533	0.109038	0.698888
Ncaph	blue	0.79295	0.12816	0.873709	0.183073	1592.32	739.922	852.399	-112.476	-0.370309	0.17425	-0.58709	0.021394	0.957399	2.18814e-08	0.873709	2.08037e-05	0.79295	0.000420956	0.12816	0.648976	0.183073	0.513703
Tctn2	blue	0.85453	0.0119192	0.817032	0.0648304	1534.98	876.188	658.788	217.4	-0.27644	0.31858	-0.680536	0.00523289	0.956976	2.33092e-08	0.817032	0.00020053	0.85453	4.96897e-05	0.0119192	0.966372	0.0648304	0.818446
Fbxw17	blue	0.816865	0.0827656	0.842276	0.132527	1550.31	797.719	752.586	45.1331	-0.335627	0.221339	-0.621137	0.0134583	0.956764	2.40529e-08	0.842276	8.14872e-05	0.816865	0.000201633	0.0827656	0.769336	0.132527	0.63776
Rcn1	blue	0.789591	0.118239	0.845425	0.104094	1506.13	728.462	777.665	-49.2031	-0.36345	0.182991	-0.593263	0.0197409	0.956712	2.42371e-08	0.845425	7.20498e-05	0.789591	0.000463314	0.118239	0.674714	0.104094	0.711991
Dennd1c	blue	0.771863	0.14527	0.870741	0.140197	1506.33	674.84	831.491	-156.651	-0.389684	0.151057	-0.566567	0.0276588	0.956251	2.59369e-08	0.870741	2.4015e-05	0.771863	0.000748422	0.14527	0.605454	0.140197	0.61824
Asf1b	blue	0.87259	-0.0069847	0.810888	0.0931793	1619.27	963.231	656.041	307.19	-0.25932	0.350657	-0.69681	0.00389326	0.95613	2.63987e-08	0.810888	0.000244655	0.87259	2.19696e-05	-0.0069847	0.98029	0.0931793	0.741178
Slc27a2	blue	-0.740045	-0.17974	-0.881977	-0.0567772	1432.22	577.121	855.1	-277.979	0.432469	0.107398	0.523647	0.0451357	-0.956116	2.64554e-08	-0.881977	1.36771e-05	-0.740045	0.00160802	-0.17974	0.521528	-0.0567772	0.840714
Sec61a2	blue	0.784701	0.11829	0.84939	0.136744	1482.82	700.263	782.561	-82.2983	-0.360742	0.186518	-0.595249	0.0192302	0.955991	2.69374e-08	0.84939	6.14668e-05	0.784701	0.000531137	0.11829	0.674581	0.136744	0.627
Lig1	blue	0.78576	0.110633	0.872435	0.121313	1493.41	675.223	818.189	-142.966	-0.374305	0.169286	-0.581533	0.0229711	0.955838	2.75449e-08	0.872435	2.2135e-05	0.78576	0.000515797	0.110633	0.694678	0.121313	0.666701
Eci1	blue	-0.752631	-0.164803	-0.884725	-0.0962555	1454.23	594.615	859.616	-265.001	0.411392	0.127637	0.544227	0.0359586	-0.955619	2.84278e-08	-0.884725	1.18163e-05	-0.752631	0.00120411	-0.164803	0.557241	-0.0962555	0.732917
Cdca8	blue	0.84662	0.0348713	0.832472	0.133389	1594.52	881.208	713.314	167.894	-0.294081	0.287367	-0.66151	0.00723528	0.955591	2.8542e-08	0.832472	0.000117618	0.84662	6.87138e-05	0.0348713	0.90181	0.133389	0.635554
Ccdc109b	blue	0.812628	0.0721877	0.845054	0.0853398	1469.3	742.71	726.59	16.12	-0.329242	0.230802	-0.626318	0.0124853	0.955559	2.86734e-08	0.845054	7.31121e-05	0.812628	0.000231424	0.0721877	0.798214	0.0853398	0.762349
Smpd2	blue	-0.832757	-0.0355225	-0.832222	-0.128104	1492.48	793.931	698.545	95.3854	0.292766	0.289629	0.662701	0.00709462	-0.955467	2.90569e-08	-0.832222	0.00011869	-0.832757	0.00011641	-0.0355225	0.899984	-0.128104	0.64912
Rab9	blue	-0.859431	0.00972899	-0.800155	-0.0505515	1505.23	890.242	614.991	275.25	0.261942	0.345632	0.692903	0.00418667	-0.954845	3.17509e-08	-0.800155	0.000340685	-0.859431	4.02619e-05	0.00972899	0.972549	-0.0505515	0.858006
Padi2	blue	0.867001	-0.0177239	0.793339	0.059132	1532.71	922.515	610.198	312.317	-0.252507	0.363904	-0.702147	0.00351917	0.954654	3.26195e-08	0.793339	0.000416255	0.867001	2.86356e-05	-0.0177239	0.950011	0.059132	0.83419
Akr1b7	blue	-0.771009	-0.12777	-0.855969	-0.136822	1415.08	646.422	768.661	-122.239	0.386141	0.155135	0.568462	0.0270283	-0.954603	3.28532e-08	-0.855969	4.67504e-05	-0.771009	0.000765111	-0.12777	0.64998	-0.136822	0.626801
Itpr3	blue	0.874619	-0.0143209	0.808477	0.0677758	1596.91	958.134	638.779	319.355	-0.256553	0.356003	-0.697682	0.00383009	0.954235	3.45904e-08	0.808477	0.000264006	0.874619	1.98933e-05	-0.0143209	0.959601	0.0677758	0.810333
Myl2	blue	0.734377	0.144121	0.844832	0.0133964	1255.74	533.958	721.778	-187.82	-0.404059	0.135251	-0.550134	0.0336033	0.954193	3.47955e-08	0.844832	7.37541e-05	0.734377	0.00182242	0.144121	0.60834	0.0133964	0.962207
Pqlc3	blue	0.79164	0.102017	0.841429	-0.0489134	1437.57	706.495	731.076	-24.5812	-0.358989	0.188826	-0.595088	0.0192714	0.954076	3.53666e-08	0.841429	8.4193e-05	0.79164	0.000437073	0.102017	0.717516	-0.0489134	0.862566
Btbd10	blue	0.765354	0.147725	0.89	0.180325	1522.11	635.369	886.738	-251.369	-0.390543	0.150079	-0.563269	0.0287827	0.953812	3.66886e-08	0.89	8.82983e-06	0.765354	0.000883382	0.147725	0.599306	0.180325	0.52015
Ifi27l2a	blue	0.832003	0.0470588	0.82086	0.0536276	1512.34	822.933	689.41	133.523	-0.298355	0.280088	-0.655255	0.00801083	0.953611	3.77192e-08	0.82086	0.000176506	0.832003	0.000119631	0.0470588	0.867734	0.0536276	0.849454
Parvg	blue	0.816661	0.0740418	0.848352	0.12713	1513.87	772.17	741.697	30.4729	-0.329351	0.230637	-0.623865	0.012939	0.953216	3.9817e-08	0.848352	6.41041e-05	0.816661	0.000202991	0.0740418	0.793133	0.12713	0.651631
Cdca5	blue	0.824004	0.0551894	0.818551	0.096393	1490.03	804.596	685.432	119.164	-0.310371	0.260222	-0.642597	0.00977915	0.952968	4.11854e-08	0.818551	0.000190696	0.824004	0.000158588	0.0551894	0.845118	0.096393	0.732548
Ptgir	blue	0.807573	0.0867099	0.846374	0.0494695	1510.52	759.197	751.318	7.8788	-0.334886	0.222424	-0.617194	0.0142372	0.952081	4.64039e-08	0.846374	6.93874e-05	0.807573	0.000271581	0.0867099	0.758637	0.0494695	0.861018
Pcbp3	blue	0.795622	0.0741366	0.812946	-0.0507566	1358.97	690.505	668.463	22.0429	-0.333804	0.224016	-0.618216	0.0140321	0.95202	4.67804e-08	0.812946	0.00022907	0.795622	0.000389555	0.0741366	0.792874	-0.0507566	0.857435
Zbtb42	blue	0.786338	0.102638	0.867887	0.0759938	1446.75	652.708	794.044	-141.337	-0.358636	0.189291	-0.593091	0.0197856	0.951727	4.86339e-08	0.867887	2.74791e-05	0.786338	0.000507581	0.102638	0.715863	0.0759938	0.787793
Agpat5	blue	0.844593	0.033557	0.825432	0.068648	1550.91	856.531	694.376	162.155	-0.288574	0.29691	-0.663086	0.00704955	0.95166	4.9069e-08	0.825432	0.000150962	0.844593	7.44502e-05	0.033557	0.905495	0.068648	0.807934
Lilra6	blue	0.760757	0.156746	0.873405	0.130371	1474.58	644.534	830.05	-185.516	-0.398034	0.141733	-0.553552	0.0322945	0.951586	4.95501e-08	0.873405	2.11153e-05	0.760757	0.0009901	0.156746	0.576929	0.130371	0.643289
Cyp4f16	blue	0.831152	0.0370396	0.806371	0.080519	1469.02	816.442	652.58	163.862	-0.292417	0.290232	-0.659005	0.0075385	0.951421	5.0633e-08	0.806371	0.000281919	0.831152	0.000123359	0.0370396	0.895734	0.080519	0.775447
Mcm3	blue	0.872231	-0.0140285	0.801424	0.124706	1572.17	947.652	624.517	323.135	-0.253985	0.361006	-0.697229	0.00386284	0.951214	5.20294e-08	0.801424	0.000327941	0.872231	2.23548e-05	-0.0140285	0.960425	0.124706	0.657895
Fdx1	blue	-0.867727	0.0188524	-0.798142	-0.0600702	1534.89	921.189	613.702	307.487	0.246559	0.37569	0.70432	0.00337533	-0.950879	5.43522e-08	-0.798142	0.00036173	-0.867727	2.76853e-05	0.0188524	0.946832	-0.0600702	0.831593
Plekha2	blue	0.849203	0.0312411	0.824891	0.139726	1566.66	881.634	685.021	196.613	-0.288067	0.297796	-0.662507	0.00711742	0.950574	5.65416e-08	0.824891	0.000153814	0.849203	6.19349e-05	0.0312411	0.911993	0.139726	0.619431
Prr15	blue	0.710435	0.208984	0.863087	-0.00519225	1325.16	517.906	807.256	-289.351	-0.452235	0.0905529	-0.498313	0.0586832	0.950548	5.67302e-08	0.863087	3.42377e-05	0.710435	0.00299548	0.208984	0.45477	-0.00519225	0.985348
Acox1	blue	-0.743603	-0.175055	-0.878877	-0.104534	1433.31	588.281	845.025	-256.744	0.418451	0.12059	0.53188	0.0412774	-0.950331	5.83351e-08	-0.878877	1.60622e-05	-0.743603	0.00148418	-0.175055	0.532616	-0.104534	0.710822
Sh2d5	blue	0.820711	0.0382571	0.819034	0.123736	1403.47	751.871	651.602	100.27	-0.303542	0.271405	-0.646489	0.0092059	0.950031	6.06256e-08	0.819034	0.000187654	0.820711	0.000177393	0.0382571	0.892325	0.123736	0.66041
Espl1	blue	0.794455	0.0850973	0.823834	0.229799	1388.84	699.252	689.583	9.669	-0.333798	0.224025	-0.615979	0.0144843	0.949776	6.26196e-08	0.823834	0.000159517	0.794455	0.000403029	0.0850973	0.763007	0.229799	0.409992
Tubb4	blue	0.756861	0.139898	0.841499	0.0643659	1385.87	626.669	759.204	-132.535	-0.385127	0.156315	-0.564518	0.028353	0.949645	6.36734e-08	0.841499	8.39639e-05	0.756861	0.00108847	0.139898	0.618997	0.0643659	0.819727
Pif1	blue	0.8174	0.0586768	0.848491	0.149796	1474.5	743.869	730.63	13.2388	-0.321725	0.24226	-0.627733	0.0122293	0.949458	6.51917e-08	0.848491	6.37448e-05	0.8174	0.000198109	0.0586768	0.83545	0.149796	0.594137
Klrd1	blue	0.809631	0.0446323	0.806149	-0.0492802	1341.37	716.167	625.208	90.9587	-0.30483	0.269274	-0.644024	0.00956578	0.948854	7.03244e-08	0.806149	0.000283867	0.809631	0.000254594	0.0446323	0.874503	-0.0492802	0.861545
Upp2	blue	-0.802008	-0.0553037	-0.812093	0.00616298	1363.45	707.472	655.976	51.4963	0.313081	0.255863	0.635668	0.0108683	-0.948749	7.12473e-08	-0.812093	0.000235423	-0.802008	0.000322206	-0.0553037	0.8448	0.00616298	0.982609
Col12a1	blue	0.784453	0.117584	0.844108	0.0445554	1468.03	703.32	764.709	-61.3889	-0.36051	0.186822	-0.588153	0.0211022	0.948663	7.2019e-08	0.844108	7.58808e-05	0.784453	0.000534781	0.117584	0.676425	0.0445554	0.874718
Rassf2	blue	0.836001	0.0236242	0.801745	0.00273981	1454.5	821.695	632.81	188.885	-0.279387	0.313236	-0.66922	0.00636199	0.948607	7.25216e-08	0.801745	0.000324776	0.836001	0.000103341	0.0236242	0.933399	0.00273981	0.992268
Pfn2	blue	0.844713	0.000555176	0.796043	0.0873678	1425.43	824.885	600.547	224.338	-0.264941	0.339932	-0.683516	0.00496373	0.948457	7.38783e-08	0.796043	0.00038479	0.844713	7.40983e-05	0.000555176	0.998433	0.0873678	0.756857
E130303B06Rik	blue	0.886068	-0.0360464	0.79568	0.105219	1601.78	994.932	606.852	388.08	-0.227036	0.415799	-0.721254	0.00240751	0.94829	7.54157e-08	0.79568	0.000388901	0.886068	1.09862e-05	-0.0360464	0.898516	0.105219	0.709001
Fignl1	blue	0.815801	0.0701005	0.834837	0.156824	1483.68	774.077	709.606	64.4708	-0.324984	0.237249	-0.623284	0.0130481	0.948269	7.56157e-08	0.834837	0.000107885	0.815801	0.000208804	0.0701005	0.803942	0.156824	0.576738
Foxred2	blue	0.750337	0.154412	0.863986	0.126185	1345.42	581.486	763.934	-182.448	-0.403706	0.135625	-0.544396	0.0358895	0.948102	7.71818e-08	0.863986	3.28773e-05	0.750337	0.00127083	0.154412	0.582686	0.126185	0.654072
Slc28a2	blue	0.844543	0.0184176	0.802216	0.0555059	1493	857.556	635.44	222.116	-0.272983	0.324917	-0.674914	0.00577206	0.947897	7.91486e-08	0.802216	0.000320183	0.844543	7.45961e-05	0.0184176	0.948057	0.0555059	0.84424
Hpse	blue	0.831267	0.03955	0.807683	0.132134	1446.15	804.913	641.237	163.676	-0.293514	0.288341	-0.654177	0.0081509	0.947691	8.11654e-08	0.807683	0.000270647	0.831267	0.00012285	0.03955	0.888706	0.132134	0.638767
Tubb5	blue	0.860986	-0.0179115	0.780146	0.0639603	1484.52	900.07	584.451	315.62	-0.245204	0.378404	-0.701961	0.00353173	0.947164	8.65126e-08	0.780146	0.000601387	0.860986	3.76003e-05	-0.0179115	0.949482	0.0639603	0.820846
Icam4	blue	-0.742927	-0.117371	-0.819714	-0.0430477	1144.39	512.983	631.409	-118.425	0.374128	0.169505	0.57284	0.0256132	-0.946968	8.85818e-08	-0.819714	0.000183436	-0.742927	0.00150709	-0.117371	0.676981	-0.0430477	0.878928
Cd68	blue	0.782576	0.122992	0.856984	0.0901259	1463.13	685.541	777.59	-92.0485	-0.363748	0.182605	-0.583174	0.0224962	0.946922	8.90666e-08	0.856984	4.4765e-05	0.782576	0.000563023	0.122992	0.662339	0.0901259	0.749405
Aplp1	blue	0.761589	0.129271	0.841266	0.161514	1348.17	614.752	733.416	-118.664	-0.370942	0.173457	-0.575587	0.0247545	0.94653	9.33508e-08	0.841266	8.47209e-05	0.761589	0.000970051	0.129271	0.646116	0.161514	0.565244
Cyba	blue	0.711603	0.225485	0.881507	0.127508	1437.21	553.175	884.032	-330.857	-0.454673	0.088613	-0.491738	0.0626372	0.946411	9.46739e-08	0.881507	1.40187e-05	0.711603	0.00292697	0.225485	0.419077	0.127508	0.650658
Uap1l1	blue	0.865278	-0.00141366	0.805617	0.116481	1572.58	934.41	638.175	296.235	-0.255173	0.358687	-0.690925	0.00434176	0.946098	9.82494e-08	0.805617	0.000288572	0.865278	3.10003e-05	-0.00141366	0.996011	0.116481	0.679312
Afp	blue	0.772272	0.0748519	0.810722	-0.0457707	1203.03	584.433	618.594	-34.1617	-0.337623	0.218431	-0.608331	0.0161156	0.945955	9.99302e-08	0.810722	0.00024595	0.772272	0.000740529	0.0748519	0.790916	-0.0457707	0.871326
Unc13d	blue	0.885554	-0.0355524	0.793872	0.0990508	1598.38	998.096	600.287	397.81	-0.230413	0.408706	-0.715265	0.00272032	0.945678	1.03236e-07	0.793872	0.000409898	0.885554	1.12979e-05	-0.0355524	0.899901	0.0990508	0.725433
Adam19	blue	0.877354	-0.036272	0.792013	0.150972	1528.59	941.161	587.43	353.731	-0.230313	0.408917	-0.715345	0.00271592	0.945657	1.03483e-07	0.792013	0.000432434	0.877354	1.73552e-05	-0.036272	0.897884	0.150972	0.591212
Phf13	blue	0.825949	0.0444729	0.821032	0.0719435	1464.49	786.289	678.201	108.088	-0.289418	0.295434	-0.656141	0.00789718	0.94556	1.04675e-07	0.821032	0.000175487	0.825949	0.000148272	0.0444729	0.874948	0.0719435	0.798883
Oas1e	blue	0.805675	0.0660531	0.835014	-0.0249716	1385.6	699.542	686.054	13.4882	-0.325766	0.236057	-0.619788	0.0137211	0.945553	1.0475e-07	0.835014	0.000107184	0.805675	0.000288058	0.0660531	0.815076	-0.0249716	0.929609
Rfx1	blue	0.857672	0.00199199	0.814389	0.157388	1506.92	870.287	636.628	233.658	-0.260809	0.347799	-0.684719	0.00485818	0.945528	1.05065e-07	0.814389	0.000218636	0.857672	4.3458e-05	0.00199199	0.994378	0.157388	0.575351
Sdcbp2	blue	0.717668	0.209964	0.878156	-0.0429805	1389.91	541.5	848.408	-306.908	-0.442341	0.0987327	-0.502926	0.0560198	0.945268	1.08298e-07	0.878156	1.66641e-05	0.717668	0.00259111	0.209964	0.45261	-0.0429805	0.879116
B3gnt3	blue	0.771438	0.153589	0.877408	0.137137	1510.35	667.143	843.202	-176.059	-0.386363	0.154877	-0.558844	0.0303442	0.945207	1.09072e-07	0.877408	1.73084e-05	0.771438	0.000756683	0.153589	0.584721	0.137137	0.625999
C1qtnf6	blue	0.835317	0.0269742	0.819836	0.0496982	1428.32	786.626	641.693	144.933	-0.289898	0.294598	-0.655248	0.00801179	0.945146	1.09845e-07	0.819836	0.000182689	0.835317	0.000105994	0.0269742	0.923978	0.0496982	0.860381
Ddx28	blue	0.770715	0.106179	0.817092	-0.00264929	1307.43	621.226	686.209	-64.983	-0.345995	0.206502	-0.599128	0.0182624	0.945123	1.1013e-07	0.817092	0.000200134	0.770715	0.000770916	0.106179	0.706455	-0.00264929	0.992524
Tmem119	blue	0.849538	-0.00106046	0.795381	-0.029492	1456.76	845.013	611.748	233.265	-0.258411	0.352408	-0.686631	0.00469417	0.945042	1.11175e-07	0.795381	0.000392314	0.849538	6.1097e-05	-0.00106046	0.997007	-0.029492	0.916904
Pkmyt1	blue	0.809935	0.07283	0.823485	0.110637	1445.05	757.372	687.679	69.6934	-0.321135	0.243175	-0.623863	0.0129393	0.944997	1.1175e-07	0.823485	0.000161439	0.809935	0.000252157	0.07283	0.796453	0.110637	0.694665
Hist1h2an	blue	0.867123	-0.0219619	0.78803	0.0566317	1509.35	918.766	590.581	328.185	-0.24337	0.382094	-0.701619	0.00355485	0.944989	1.11862e-07	0.78803	0.000484147	0.867123	2.84742e-05	-0.0219619	0.938077	0.0566317	0.841117
Spats2l	blue	0.835501	0.0314192	0.82553	0.0792509	1469.57	797.21	672.362	124.848	-0.284015	0.304947	-0.660055	0.00741019	0.94407	1.24294e-07	0.82553	0.000150449	0.835501	0.000105275	0.0314192	0.911493	0.0792509	0.778902
Lipo1	blue	0.850223	0.0103567	0.798344	0.0478171	1464.54	859.209	605.327	253.883	-0.273517	0.323934	-0.6704	0.00623597	0.943917	1.26481e-07	0.798344	0.000359572	0.850223	5.94155e-05	0.0103567	0.970779	0.0478171	0.865621
Pdia6	blue	0.823693	0.0319965	0.805398	0.141376	1375.18	757.821	617.361	140.46	-0.28859	0.29688	-0.655116	0.00802888	0.943706	1.29539e-07	0.805398	0.000290528	0.823693	0.000160294	0.0319965	0.909873	0.141376	0.61526
P4ha1	blue	0.799707	0.09767	0.84198	0.122864	1426.01	709.451	716.558	-7.10674	-0.342146	0.211934	-0.601524	0.0176835	0.94367	1.30065e-07	0.84198	8.24243e-05	0.799707	0.000345283	0.09767	0.729127	0.122864	0.662672
Fubp1	blue	0.850555	0.00189176	0.807862	0.0354323	1449.79	836.388	613.4	222.988	-0.268589	0.333073	-0.674949	0.00576858	0.943538	1.3201e-07	0.807862	0.000269138	0.850555	5.86132e-05	0.00189176	0.994661	0.0354323	0.900237
Tcirg1	blue	0.87263	-0.0380318	0.778618	0.0460183	1472.07	913.789	558.284	355.505	-0.223416	0.423471	-0.720117	0.00246458	0.943533	1.32096e-07	0.778618	0.000626562	0.87263	2.19269e-05	-0.0380318	0.892956	0.0460183	0.870636
Igfbp2	blue	-0.77615	-0.112837	-0.84619	-0.0548165	1347.61	626.799	720.81	-94.0111	0.360447	0.186905	0.581973	0.022843	-0.94242	1.49559e-07	-0.84619	6.98975e-05	-0.77615	0.000669056	-0.112837	0.688873	-0.0548165	0.846153
Rad51	blue	0.809222	0.0633659	0.814064	0.117503	1389.58	736.415	653.166	83.2492	-0.316386	0.250608	-0.625967	0.0125494	0.942353	1.50658e-07	0.814064	0.000220947	0.809222	0.000257896	0.0633659	0.822486	0.117503	0.676637
Numbl	blue	0.798891	0.0588052	0.805576	0.0432859	1279.15	674.517	604.632	69.8855	-0.326763	0.234542	-0.615559	0.0145705	0.942322	1.51183e-07	0.805576	0.000288939	0.798891	0.000353778	0.0588052	0.835095	0.0432859	0.878263
Wdr54	blue	0.796234	0.0651363	0.811396	0.0180071	1311.39	675.455	635.935	39.5194	-0.32629	0.23526	-0.615662	0.0145492	0.941953	1.57439e-07	0.811396	0.000240728	0.796234	0.000382643	0.0651363	0.817602	0.0180071	0.949213
B9d1	blue	0.897044	-0.0707228	0.770097	0.1079	1547.91	1014.17	533.74	480.426	-0.201602	0.471208	-0.739906	0.00161303	0.941508	1.65263e-07	0.770097	0.000783265	0.897044	5.84467e-06	-0.0707228	0.802233	0.1079	0.701897
Serpinh1	blue	0.897607	-0.0645237	0.772814	0.0479082	1577.7	1027.83	549.872	477.955	-0.20251	0.469171	-0.738855	0.00165125	0.941366	1.67842e-07	0.772814	0.000730196	0.897607	5.64779e-06	-0.0645237	0.819291	0.0479082	0.865367
Cnn2	blue	0.875863	-0.0234077	0.802773	0.121378	1552.29	944.136	608.151	335.985	-0.244206	0.380409	-0.696943	0.00388358	0.941149	1.71824e-07	0.802773	0.000314821	0.875863	1.8703e-05	-0.0234077	0.934008	0.121378	0.666533
Akna	blue	0.854022	0.000110098	0.800845	0.186564	1471.38	867.188	604.192	262.996	-0.25838	0.352469	-0.682733	0.00503329	0.941113	1.72487e-07	0.800845	0.00033371	0.854022	5.07642e-05	0.000110098	0.999689	0.186564	0.505567
Dppa5a	blue	0.858055	-0.025001	0.787495	0.0671713	1401.7	837.526	564.176	273.35	-0.241532	0.38581	-0.699188	0.00372286	0.94072	1.79938e-07	0.787495	0.000491454	0.858055	4.27456e-05	-0.025001	0.929526	0.0671713	0.811996
Ahi1	blue	0.758723	0.110372	0.831615	0.0827828	1205.75	556.174	649.58	-93.4059	-0.357597	0.19067	-0.583108	0.0225153	0.940705	1.80229e-07	0.831615	0.000121317	0.758723	0.00104053	0.110372	0.695364	0.0827828	0.769289
Zfp52	blue	0.837967	0.0373264	0.817585	0.0766819	1507.91	841.388	666.52	174.868	-0.285028	0.30315	-0.655402	0.00799188	0.940431	1.85596e-07	0.817585	0.000196902	0.837967	9.60309e-05	0.0373264	0.894931	0.0766819	0.785912
Slx4	blue	0.858688	-0.0262241	0.772011	0.0713842	1421.2	869.586	551.616	317.97	-0.233038	0.403239	-0.707351	0.00318253	0.940389	1.86429e-07	0.772011	0.00074557	0.858688	4.15883e-05	-0.0262241	0.926087	0.0713842	0.800418
5730528L13Rik	blue	0.826954	0.0219613	0.78744	-0.028484	1329.53	758.311	571.215	187.096	-0.291291	0.292179	-0.648819	0.0088754	0.94011	1.92034e-07	0.78744	0.000492216	0.826954	0.000143166	0.0219613	0.938078	-0.028484	0.919736
Sox6	blue	-0.847294	0.000632351	-0.802783	-0.0624101	1437.32	824.187	613.129	211.058	0.254743	0.359525	0.685136	0.00482204	-0.939879	1.96786e-07	-0.802783	0.00031473	-0.847294	6.68889e-05	0.000632351	0.998215	-0.0624101	0.825125
4930427A07Rik	blue	0.88973	-0.0612521	0.770411	0.104761	1526.78	987.592	539.191	448.401	-0.204239	0.465303	-0.735612	0.00177386	0.939851	1.97379e-07	0.770411	0.000776977	0.88973	8.96593e-06	-0.0612521	0.828325	0.104761	0.710218
Zwilch	blue	0.845858	0.0041642	0.784099	0.12363	1419.98	838.477	581.506	256.972	-0.263358	0.342934	-0.676141	0.00565083	0.939499	2.04829e-07	0.784099	0.000540017	0.845858	7.08261e-05	0.0041642	0.988249	0.12363	0.660684
Gch1	blue	-0.86803	0.0567668	-0.766942	-0.0060482	1389.63	871.687	517.945	353.742	0.220408	0.429901	0.719047	0.00251924	-0.939455	2.05776e-07	-0.766942	0.000848768	-0.86803	2.72963e-05	0.0567668	0.840742	-0.0060482	0.982933
Phf21b	blue	0.766461	0.106832	0.835852	-0.0611802	1285.71	602.314	683.393	-81.0788	-0.363671	0.182705	-0.575338	0.0248314	0.939009	2.15592e-07	0.835852	0.000103916	0.766461	0.000859137	0.106832	0.704725	-0.0611802	0.828524
Tgfb1i1	blue	0.785301	0.120808	0.856295	0.160786	1456.75	694.146	762.6	-68.4543	-0.36368	0.182692	-0.575026	0.0249282	0.938706	2.22483e-07	0.856295	4.6104e-05	0.785301	0.000522398	0.120808	0.668016	0.160786	0.567022
Aaas	blue	0.89079	-0.0671506	0.759465	0.062161	1491.73	978.752	512.982	465.771	-0.200041	0.474722	-0.738645	0.00165898	0.938686	2.22947e-07	0.759465	0.0010219	0.89079	8.44246e-06	-0.0671506	0.812053	0.062161	0.825813
Ttpa	blue	-0.859662	0.00481731	-0.792825	-0.0753524	1492.54	897.685	594.85	302.836	0.256356	0.356387	0.682308	0.00507146	-0.938664	2.23467e-07	-0.792825	0.000422466	-0.859662	3.98574e-05	0.00481731	0.986406	-0.0753524	0.789547
Sult1a1	blue	-0.871368	0.0350554	-0.786295	-0.141509	1468.46	911.095	557.361	353.734	0.235855	0.397413	0.702687	0.00348299	-0.938542	2.26303e-07	-0.786295	0.000508187	-0.871368	2.33039e-05	0.0350554	0.901294	-0.141509	0.614923
Fam111a	blue	0.86098	0.00124175	0.800973	0.109954	1534.08	914.83	619.253	295.577	-0.255389	0.358267	-0.682941	0.00501476	0.93833	2.31297e-07	0.800973	0.000332428	0.86098	3.76115e-05	0.00124175	0.996496	0.109954	0.696468
Hck	blue	0.721817	0.206196	0.881515	0.134457	1401.01	553.394	847.613	-294.219	-0.43377	0.106227	-0.503576	0.0556522	0.937345	2.55763e-07	0.881515	1.40124e-05	0.721817	0.00237969	0.206196	0.460945	0.134457	0.632828
Vill	blue	0.781938	0.0906855	0.813045	0.0804497	1305.84	663.268	642.572	20.6955	-0.341817	0.212402	-0.595523	0.0191607	0.93734	2.55897e-07	0.813045	0.000228335	0.781938	0.000572898	0.0906855	0.747895	0.0804497	0.775636
Plcd3	blue	0.843809	-0.00604432	0.784408	0.106872	1375.68	807.288	568.391	238.897	-0.255437	0.358174	-0.681833	0.00511433	0.93727	2.57734e-07	0.784408	0.000535444	0.843809	7.67712e-05	-0.00604432	0.982944	0.106872	0.70462
Tmem181a	blue	0.839384	0.000607143	0.794576	0.282023	1344.43	776.345	568.08	208.265	-0.265226	0.339395	-0.671939	0.00607465	0.937165	2.60483e-07	0.794576	0.000401611	0.839384	9.10309e-05	0.000607143	0.998287	0.282023	0.3085
Sdf2l1	blue	0.864318	-0.0430904	0.762736	0.0746323	1405.3	879.6	525.696	353.904	-0.21964	0.431551	-0.717422	0.0026041	0.937062	2.63196e-07	0.762736	0.000942938	0.864318	3.23861e-05	-0.0430904	0.878809	0.0746323	0.791517
Cdc20	blue	0.763331	0.131358	0.84786	0.126404	1369.17	629.736	739.429	-109.693	-0.3673	0.17805	-0.569477	0.0266953	0.936776	2.70873e-07	0.84786	6.53863e-05	0.763331	0.000929139	0.131358	0.640756	0.126404	0.653505
Ctbp2	blue	0.881796	-0.0344521	0.788122	0.114246	1544.11	970.246	573.866	396.38	-0.226058	0.417864	-0.709715	0.00303834	0.935773	2.9931e-07	0.788122	0.000482898	0.881796	1.38078e-05	-0.0344521	0.902985	0.114246	0.68517
Cpe	blue	0.78614	0.0687591	0.834525	-0.0586824	1286.28	623.513	662.765	-39.252	-0.32503	0.23718	-0.610614	0.0156145	0.935644	3.03159e-07	0.834525	0.000109127	0.78614	0.000510385	0.0687591	0.807628	-0.0586824	0.835435
Phc1	blue	0.823035	0.0518551	0.8376	0.0831099	1456.8	765.945	690.856	75.0891	-0.297122	0.282176	-0.638504	0.0104116	0.935626	3.03685e-07	0.8376	9.73611e-05	0.823035	0.000163941	0.0518551	0.85438	0.0831099	0.768401
Mcm2	blue	0.793296	0.0724382	0.806792	0.111549	1256.49	656.188	600.298	55.8905	-0.3349	0.222404	-0.600432	0.0179457	0.935331	3.12622e-07	0.806792	0.000278262	0.793296	0.000416769	0.0724382	0.797527	0.111549	0.692263
Cgref1	blue	0.864223	-0.0536538	0.761336	-0.0623741	1364.13	855.63	508.504	347.125	-0.217554	0.436048	-0.717716	0.00258859	0.93527	3.14515e-07	0.761336	0.000976107	0.864223	3.25267e-05	-0.0536538	0.849381	-0.0623741	0.825225
Slc16a7	blue	-0.730219	-0.117691	-0.799748	0.0352434	1090.02	490.293	599.724	-109.431	0.366233	0.17941	0.568922	0.0268768	-0.935156	3.18046e-07	-0.799748	0.000344854	-0.730219	0.0019938	-0.117691	0.676146	0.0352434	0.900767
Dnmt1	blue	0.877593	-0.0533242	0.769787	0.0565795	1459.16	930.327	528.832	401.495	-0.216727	0.437836	-0.718326	0.0025566	0.935054	3.21226e-07	0.769787	0.00078951	0.877593	1.71465e-05	-0.0533242	0.850297	0.0565795	0.841262
Frzb	blue	0.871959	-0.0333182	0.789202	0.12376	1468.33	904.143	564.184	339.959	-0.227382	0.415068	-0.707582	0.00316821	0.934964	3.24047e-07	0.789202	0.000468437	0.871959	2.26507e-05	-0.0333182	0.906165	0.12376	0.660347
Nid1	blue	0.848668	0.0113163	0.811926	0.100262	1466.7	843.195	623.507	219.687	-0.266576	0.336849	-0.668329	0.00645846	0.934905	3.25934e-07	0.811926	0.000236687	0.848668	6.32904e-05	0.0113163	0.968072	0.100262	0.722198
Erbb4	blue	-0.762596	-0.0970907	-0.824265	-0.0374129	1229.74	567.789	661.947	-94.1582	0.334273	0.223326	0.60056	0.0179148	-0.934832	3.28244e-07	-0.824265	0.000157174	-0.762596	0.000946223	-0.0970907	0.730678	-0.0374129	0.894688
A130022J15Rik	blue	0.899937	-0.0859819	0.757602	0.0937177	1517.71	1011.29	506.417	504.877	-0.182432	0.515204	-0.752259	0.00121473	0.934692	3.32759e-07	0.757602	0.00106918	0.899937	4.89107e-06	-0.0859819	0.760609	0.0937177	0.73973
Tmsb4x	blue	0.753105	0.167615	0.864991	0.144028	1425.69	625.074	800.611	-175.536	-0.395703	0.144296	-0.538808	0.0382256	0.934511	3.3864e-07	0.864991	3.14092e-05	0.753105	0.00119067	0.167615	0.55044	0.144028	0.608576
Gas8	blue	0.886528	-0.0645453	0.756851	0.0768654	1487.4	971.597	515.799	455.798	-0.197974	0.479393	-0.736467	0.00174086	0.93444	3.40962e-07	0.756851	0.00108874	0.886528	1.07132e-05	-0.0645453	0.819232	0.0768654	0.785411
Plin4	blue	0.728099	0.13596	0.818222	-0.0747778	1146.16	489.765	656.393	-166.628	-0.376775	0.166265	-0.557629	0.0307837	0.934404	3.42152e-07	0.818222	0.000192788	0.728099	0.00208605	0.13596	0.628993	-0.0747778	0.791119
AI467606	blue	0.880304	-0.0459161	0.775879	0.0628036	1506.66	958.622	548.04	410.583	-0.219221	0.432453	-0.71475	0.00274862	0.933971	3.56731e-07	0.775879	0.000673862	0.880304	1.49247e-05	-0.0459161	0.870921	0.0628036	0.824039
Pmm1	blue	0.872222	-0.0426301	0.773414	0.0125983	1461.67	918.252	543.42	374.832	-0.217329	0.436534	-0.716625	0.00264656	0.933954	3.57296e-07	0.773414	0.000718877	0.872222	2.23649e-05	-0.0426301	0.880095	0.0125983	0.964457
Sds	blue	-0.862868	0.00897488	-0.799784	-0.124127	1493.81	897.488	596.325	301.162	0.244307	0.380206	0.689512	0.00445532	-0.933819	3.61967e-07	-0.799784	0.000344491	-0.862868	3.45766e-05	0.00897488	0.974676	-0.124127	0.659397
Fam65c	blue	-0.710958	-0.179092	-0.856815	0.0419284	1209.61	473.812	735.795	-261.983	0.412598	0.126414	0.521117	0.0463728	-0.933715	3.65583e-07	-0.856815	4.5091e-05	-0.710958	0.00296464	-0.179092	0.523056	0.0419284	0.882056
Akr1b8	blue	0.839839	0.0239172	0.798971	0.115992	1446.42	836.494	609.924	226.57	-0.276939	0.317672	-0.656506	0.00785077	0.933445	3.75135e-07	0.798971	0.000352934	0.839839	8.94714e-05	0.0239172	0.932575	0.115992	0.680592
Rgs17	blue	0.868336	-0.0396904	0.775811	-0.048134	1417.43	880.259	537.171	343.088	-0.225279	0.419514	-0.708056	0.003139	0.933334	3.79104e-07	0.775811	0.000675083	0.868336	2.69082e-05	-0.0396904	0.888314	-0.048134	0.864738
Ces1a	blue	-0.737893	-0.153324	-0.854802	-0.00593424	1283.8	546.693	737.11	-190.417	0.396175	0.143774	0.536997	0.0390067	-0.933172	3.84982e-07	-0.854802	4.91219e-05	-0.737893	0.0016869	-0.153324	0.585378	-0.00593424	0.983254
Syt1	blue	-0.748094	-0.128529	-0.838349	-0.003638	1233.82	537.796	696.024	-158.228	0.361859	0.185058	0.571234	0.0261257	-0.933093	3.87894e-07	-0.838349	9.4661e-05	-0.748094	0.00133895	-0.128529	0.648025	-0.003638	0.989734
Gfpt1	blue	0.757562	0.0703675	0.793722	-0.0899792	1080.53	531.765	548.766	-17.0011	-0.337654	0.218388	-0.594968	0.019302	0.932621	4.05526e-07	0.793722	0.000411672	0.757562	0.00107022	0.0703675	0.803209	-0.0899792	0.7498
Cdt1	blue	0.901647	-0.0740106	0.76833	0.110481	1563.24	1034.61	528.628	505.987	-0.189794	0.498091	-0.742763	0.00151272	0.932556	4.08016e-07	0.76833	0.000819417	0.901647	4.39141e-06	-0.0740106	0.793219	0.110481	0.695077
Ttc39c	blue	-0.840453	0.00505782	-0.806307	-0.0864688	1364.93	771.947	592.979	178.968	0.251247	0.366383	0.681139	0.0051775	-0.932386	4.14587e-07	-0.806307	0.000282483	-0.840453	8.74013e-05	0.00505782	0.985727	-0.0864688	0.75929
Pira6	blue	0.76173	0.139455	0.868692	0.146267	1395.78	613.707	782.068	-168.361	-0.377923	0.164874	-0.554434	0.0319629	0.932357	4.15723e-07	0.868692	2.64628e-05	0.76173	0.00096667	0.139455	0.620118	0.146267	0.602954
Abcc5	blue	0.773787	0.130381	0.849091	0.0827472	1394.82	656.686	738.133	-81.4476	-0.362942	0.183648	-0.5694	0.0267202	0.932343	4.16276e-07	0.849091	6.22171e-05	0.773787	0.000711912	0.130381	0.643262	0.0827472	0.769386
Rgs14	blue	0.840696	0.0157058	0.821045	0.203752	1427.53	793.713	633.821	159.893	-0.272978	0.324925	-0.659188	0.00751599	0.932167	4.23181e-07	0.821045	0.000175406	0.840696	8.65917e-05	0.0157058	0.955697	0.203752	0.466392
Rin1	blue	0.833267	0.00692865	0.787916	0.208516	1300.2	752.455	547.748	204.707	-0.274493	0.322141	-0.657644	0.00770728	0.932137	4.24339e-07	0.787916	0.000485701	0.833267	0.000114268	0.00692865	0.980449	0.208516	0.455803
Cenpj	blue	0.815379	0.0255691	0.803326	0.154714	1261.01	688.519	572.494	116.024	-0.284014	0.304948	-0.648042	0.00898455	0.932057	4.27547e-07	0.803326	0.000309575	0.815379	0.000211704	0.0255691	0.927929	0.154714	0.581939
Cdca3	blue	0.844698	0.00380155	0.791561	0.15064	1410.79	830.169	580.62	249.549	-0.260841	0.347736	-0.670943	0.00617862	0.931785	4.38494e-07	0.791561	0.000438064	0.844698	7.41424e-05	0.00380155	0.989272	0.15064	0.592038
Pitpnm1	blue	0.897596	-0.0772501	0.756392	0.10231	1525.17	1017.79	507.385	510.405	-0.184733	0.509826	-0.746262	0.00139675	0.930995	4.71654e-07	0.756392	0.00110085	0.897596	5.65161e-06	-0.0772501	0.784361	0.10231	0.716738
Retsat	blue	-0.806745	-0.0512059	-0.818336	-0.0705354	1296.69	676.162	620.524	55.638	0.306777	0.266073	0.624113	0.0128925	-0.93089	4.76231e-07	-0.818336	0.000192063	-0.806745	0.000278672	-0.0512059	0.856185	-0.0705354	0.802748
Prkag2	blue	-0.857401	0.029375	-0.760953	-0.0538251	1385.14	859.029	526.114	332.916	0.222498	0.425428	0.708238	0.00312783	-0.930736	4.82982e-07	-0.760953	0.000985338	-0.857401	4.3969e-05	0.029375	0.917233	-0.0538251	0.848905
1700088E04Rik	blue	0.838744	-0.00103202	0.777834	0.0187889	1304.62	775.311	529.308	246.002	-0.265957	0.338014	-0.664759	0.00685653	0.930716	4.83861e-07	0.777834	0.000639821	0.838744	9.32618e-05	-0.00103202	0.997088	0.0187889	0.947011
AW011738	blue	0.812477	0.016247	0.776678	0.0378257	1234.16	690.853	543.311	147.542	-0.265323	0.339211	-0.665236	0.00680219	0.930559	4.90827e-07	0.776678	0.000659785	0.812477	0.000232545	0.016247	0.954172	0.0378257	0.893533
Spib	blue	0.762087	0.140137	0.855225	0.170308	1360.74	618.046	742.697	-124.651	-0.377512	0.165371	-0.552679	0.0326249	0.930191	5.07522e-07	0.855225	4.8251e-05	0.762087	0.000958191	0.140137	0.618391	0.170308	0.543959
Stk4	blue	0.861829	-0.0254651	0.802364	0.193141	1437.91	850.026	587.883	262.143	-0.230594	0.408329	-0.69958	0.00369537	0.930174	5.08334e-07	0.802364	0.00031876	0.861829	3.62198e-05	-0.0254651	0.928221	0.193141	0.490399
Itpripl2	blue	0.907158	-0.0848497	0.768276	0.10924	1569.42	1049.18	520.24	528.938	-0.180936	0.518715	-0.749027	0.00131029	0.929962	5.18152e-07	0.768276	0.000820543	0.907158	3.06015e-06	-0.0848497	0.763678	0.10924	0.698353
Nap1l1	blue	0.841858	-0.00265894	0.787634	0.0599804	1380.59	801.952	578.635	223.317	-0.245261	0.378289	-0.684575	0.00487071	0.929836	5.24078e-07	0.787634	0.000489548	0.841858	8.28126e-05	-0.00265894	0.992496	0.0599804	0.831842
Klre1	blue	0.755056	0.102156	0.832402	0.0139808	1173.04	533.911	639.13	-105.219	-0.346224	0.206181	-0.583173	0.0224966	0.929398	5.45155e-07	0.832402	0.000117916	0.755056	0.00113666	0.102156	0.717148	0.0139808	0.960559
Osbpl3	blue	0.845357	-0.0113738	0.769893	0.031764	1369.13	825.002	544.131	280.871	-0.242307	0.38424	-0.687024	0.00466099	0.929331	5.48405e-07	0.769893	0.000787369	0.845357	7.22423e-05	-0.0113738	0.96791	0.031764	0.910525
2210404O09Rik	blue	0.878743	-0.0476296	0.780371	0.0686931	1448.16	915.318	532.837	382.481	-0.214686	0.44227	-0.714468	0.00276424	0.929154	5.57178e-07	0.780371	0.000597744	0.878743	1.6173e-05	-0.0476296	0.866143	0.0686931	0.80781
Pld1	blue	0.914924	-0.111852	0.751256	0.106313	1532.15	1055	477.148	577.85	-0.160698	0.567237	-0.76841	0.00081776	0.929108	5.59477e-07	0.751256	0.00124377	0.914924	1.76807e-06	-0.111852	0.691465	0.106313	0.706099
Git2	blue	0.853296	-0.0198759	0.804402	0.0553707	1405.35	816.385	588.963	227.421	-0.244278	0.380265	-0.684752	0.00485528	0.92903	5.63373e-07	0.804402	0.000299558	0.853296	5.23313e-05	-0.0198759	0.943949	0.0553707	0.844615
Clic5	blue	0.784737	0.0836578	0.841297	0.109867	1296.02	621.114	674.904	-53.7904	-0.339595	0.215583	-0.589345	0.0207783	0.928941	5.67865e-07	0.841297	8.46185e-05	0.784737	0.000530613	0.0836578	0.766913	0.109867	0.696699
Alpl	blue	0.827014	0.00214388	0.79378	-0.032614	1254.92	707.738	547.185	160.553	-0.270254	0.32997	-0.658657	0.00758134	0.928911	5.69363e-07	0.79378	0.000410987	0.827014	0.000142864	0.00214388	0.99395	-0.032614	0.90814
Tmem108	blue	0.755272	0.133006	0.853892	0.0912653	1298.78	578.928	719.853	-140.924	-0.372198	0.171892	-0.55668	0.0311305	0.928878	5.71025e-07	0.853892	5.10408e-05	0.755272	0.00113081	0.133006	0.636534	0.0912653	0.746332
Galnt6	blue	0.751421	0.136157	0.843799	0.023384	1264.11	569.69	694.419	-124.729	-0.383201	0.158574	-0.545598	0.0354012	0.928799	5.75081e-07	0.843799	7.68018e-05	0.751421	0.00123894	0.136157	0.628493	0.023384	0.934075
Cbfb	blue	0.865228	-0.0194065	0.785845	0.0832129	1458.26	893.393	564.872	328.521	-0.23363	0.402011	-0.695135	0.00401702	0.928764	5.76835e-07	0.785845	0.00051458	0.865228	3.10714e-05	-0.0194065	0.945271	0.0832129	0.768121
Hsd17b6	blue	-0.836332	0.0107152	-0.776157	-0.0328406	1292.66	753.802	538.853	214.949	0.248631	0.371562	0.680109	0.00527236	-0.92874	5.7811e-07	-0.776157	0.000668929	-0.836332	0.000102082	0.0107152	0.969767	-0.0328406	0.907504
Cpeb1	blue	0.90053	-0.0769404	0.772251	0.0877451	1530.65	1007.07	523.58	483.487	-0.190228	0.497089	-0.737631	0.00169671	0.927859	6.24797e-07	0.772251	0.000740948	0.90053	4.71289e-06	-0.0769404	0.785207	0.0877451	0.755836
Txk	blue	0.805377	0.0448873	0.786979	0.217816	1249.04	689.558	559.478	130.08	-0.299297	0.2785	-0.628026	0.0121767	0.927323	6.54736e-07	0.786979	0.000498595	0.805377	0.000290719	0.0448873	0.873792	0.217816	0.435481
Vav1	blue	0.745606	0.159396	0.84748	0.146338	1339.04	598.968	740.077	-141.109	-0.387437	0.153634	-0.539821	0.0377939	0.927259	6.58415e-07	0.84748	6.63923e-05	0.745606	0.00141791	0.159396	0.570422	0.146338	0.602776
Fes	blue	0.826487	0.0244006	0.784914	0.120586	1299.2	753.758	545.442	208.315	-0.283018	0.306721	-0.644125	0.0095508	0.927144	6.65028e-07	0.784914	0.000528015	0.826487	0.000145521	0.0244006	0.931215	0.120586	0.668594
Hmgn2	blue	0.795294	0.0636235	0.816804	0.168921	1259.65	654.391	605.262	49.1283	-0.328152	0.232442	-0.598979	0.0182988	0.927131	6.65757e-07	0.816804	0.000202039	0.795294	0.000393304	0.0636235	0.821775	0.168921	0.547292
AI463229	blue	0.864723	-0.044598	0.763667	0.108423	1360.8	855.907	504.897	351.009	-0.209683	0.453228	-0.717241	0.00261372	0.926924	6.77802e-07	0.763667	0.000921395	0.864723	3.17956e-05	-0.044598	0.874599	0.108423	0.700512
Csnk1e	blue	0.878898	-0.0388436	0.784834	0.0905677	1505.89	944.867	561.023	383.843	-0.219187	0.432526	-0.707676	0.00316239	0.926863	6.81394e-07	0.784834	0.000529181	0.878898	1.60455e-05	-0.0388436	0.890683	0.0905677	0.748213
Rasa4	blue	0.726956	0.169163	0.840542	0.0488803	1238	528.528	709.468	-180.94	-0.395754	0.14424	-0.530743	0.0417953	0.926496	7.03257e-07	0.840542	8.71025e-05	0.726956	0.00213719	0.169163	0.54671	0.0488803	0.862659
Atp6v0e2	blue	0.901237	-0.102022	0.744747	0.0822349	1450.95	991.53	459.42	532.11	-0.172598	0.538475	-0.753895	0.00116856	0.926493	7.03465e-07	0.744747	0.00144605	0.901237	4.50715e-06	-0.102022	0.717505	0.0822349	0.770778
Tuba1a	blue	0.872458	-0.0311905	0.780696	0.118757	1470.45	921.811	548.642	373.169	-0.230968	0.407548	-0.695517	0.00398851	0.926485	7.03944e-07	0.780696	0.00059251	0.872458	2.21101e-05	-0.0311905	0.912135	0.118757	0.673362
Tmem107	blue	0.89629	-0.0807611	0.766341	0.0664805	1503.17	990.46	512.706	477.755	-0.180655	0.519374	-0.745605	0.00141795	0.926261	7.17626e-07	0.766341	0.000861739	0.89629	6.11711e-06	-0.0807611	0.774788	0.0664805	0.813898
Rras2	blue	0.898929	-0.0997184	0.758504	0.0710429	1454.42	969.697	484.725	484.972	-0.174061	0.534983	-0.752105	0.00121916	0.926166	7.23463e-07	0.758504	0.00104606	0.898929	5.2073e-06	-0.0997184	0.723649	0.0710429	0.801354
Klrc1	blue	0.782369	0.113779	0.853698	0.0812311	1383.37	650.337	733.032	-82.6949	-0.344976	0.207932	-0.581003	0.023126	0.925978	7.35185e-07	0.853698	5.14586e-05	0.782369	0.000566207	0.113779	0.686396	0.0812311	0.773509
LOC634012	blue	0.817205	0.0290141	0.808995	0.0942816	1315.77	718.175	597.595	120.58	-0.279437	0.313145	-0.646144	0.00925562	0.925581	7.60452e-07	0.808995	0.00025975	0.817205	0.000199386	0.0290141	0.918246	0.0942816	0.738215
Anxa1	blue	0.837017	0.0155838	0.792932	0.0213424	1390.19	807.659	582.535	225.124	-0.267253	0.335576	-0.658217	0.00763587	0.925471	7.67613e-07	0.792932	0.000421169	0.837017	9.95087e-05	0.0155838	0.956041	0.0213424	0.93982
Fstl1	blue	0.906479	-0.0923685	0.75047	0.0587396	1532.47	1045.85	486.62	559.234	-0.171663	0.540711	-0.753284	0.00118563	0.924947	8.02301e-07	0.75047	0.00126691	0.906479	3.20323e-06	-0.0923685	0.74336	0.0587396	0.835276
5830408C22Rik	blue	0.750306	0.135815	0.82621	-0.0518931	1237.8	574.08	663.724	-89.6436	-0.369967	0.174679	-0.554973	0.0317617	0.92494	8.0278e-07	0.82621	0.000146931	0.750306	0.00127177	0.135815	0.629365	-0.0518931	0.854274
Renbp	blue	0.784056	0.0766431	0.793107	0.0804697	1248.71	649.717	598.991	50.7256	-0.309912	0.260965	-0.614297	0.0148316	0.924209	8.53448e-07	0.793107	0.000419049	0.784056	0.000540651	0.0766431	0.786019	0.0804697	0.775581
Adap1	blue	0.840376	0.00619262	0.820645	0.149658	1420.13	785.766	634.361	151.405	-0.264814	0.340173	-0.659189	0.00751587	0.924004	8.68172e-07	0.820645	0.000177789	0.840376	8.7659e-05	0.00619262	0.982525	0.149658	0.594481
Thop1	blue	0.889443	-0.0956714	0.730032	0.00325503	1396.83	950.285	446.549	503.736	-0.176043	0.530269	-0.747856	0.00134635	0.9239	8.75695e-07	0.730032	0.00200182	0.889443	9.11199e-06	-0.0956714	0.734483	0.00325503	0.990814
Tnfrsf25	blue	0.769236	0.103083	0.816931	0.120731	1214.93	590.658	624.272	-33.6137	-0.342895	0.21087	-0.580862	0.0231671	0.923758	8.86048e-07	0.816931	0.000201196	0.769236	0.00080072	0.103083	0.714678	0.120731	0.668217
Gsta1	blue	0.789745	0.0368176	0.795328	0.0174989	1127.91	591.576	536.338	55.2384	-0.309472	0.261679	-0.614281	0.0148348	0.923753	8.8639e-07	0.795328	0.000392915	0.789745	0.000461293	0.0368176	0.896356	0.0174989	0.950644
Eps15l1	blue	0.910165	-0.107066	0.757852	0.0983771	1509.2	1026.51	482.684	543.83	-0.163917	0.559394	-0.759705	0.00101592	0.923622	8.96085e-07	0.757852	0.00106273	0.910165	2.48905e-06	-0.107066	0.704105	0.0983771	0.727235
Fbxl14	blue	0.899617	-0.0949933	0.747277	0.0853416	1467.58	993.881	473.704	520.178	-0.163568	0.560242	-0.759898	0.00101114	0.923466	9.07689e-07	0.747277	0.00136448	0.899617	4.98968e-06	-0.0949933	0.736303	0.0853416	0.762344
B3galt6	blue	0.91246	-0.113745	0.750372	0.103361	1512.17	1040.03	472.138	567.891	-0.155563	0.579844	-0.767698	0.000832682	0.923261	9.23138e-07	0.750372	0.00126981	0.91246	2.1157e-06	-0.113745	0.686486	0.103361	0.713939
Gstp1	blue	0.816333	-0.00153888	0.757608	0.0419668	1197.41	702.202	495.208	206.994	-0.253592	0.361776	-0.669649	0.00631596	0.923241	9.24655e-07	0.757608	0.00106903	0.816333	0.000205194	-0.00153888	0.995657	0.0419668	0.881948
Mboat2	blue	0.802522	0.0528144	0.796935	-0.0809343	1240.39	669.673	570.714	98.9588	-0.303118	0.272108	-0.620063	0.0136671	0.923182	9.29171e-07	0.796935	0.000374853	0.802522	0.000317229	0.0528144	0.851713	-0.0809343	0.774316
Cpt1c	blue	0.844678	0.00236909	0.807405	0.0927603	1390.5	799.952	590.545	209.408	-0.262838	0.343924	-0.660343	0.0073754	0.92318	9.29269e-07	0.807405	0.000273009	0.844678	7.42004e-05	0.00236909	0.993314	0.0927603	0.742306
Rps6ka4	blue	0.914923	-0.113263	0.736762	0.074065	1526.54	1069.9	456.639	613.265	-0.156221	0.578222	-0.766912	0.000849409	0.923133	9.32877e-07	0.736762	0.00172956	0.914923	1.76808e-06	-0.113263	0.687753	0.074065	0.79307
Ankrd52	blue	0.780116	0.0416876	0.765056	-0.0566413	1121.55	596.914	524.633	72.2807	-0.288397	0.297218	-0.634632	0.011039	0.923029	9.40889e-07	0.765056	0.000890008	0.780116	0.000601865	0.0416876	0.882728	-0.0566413	0.84109
Fam20b	blue	0.823941	-0.0137859	0.776813	0.0352561	1183.87	676.842	507.024	169.817	-0.242228	0.384401	-0.680543	0.00523218	0.922771	9.60949e-07	0.776813	0.000657426	0.823941	0.00015893	-0.0137859	0.961109	0.0352561	0.900731
Ptpn6	blue	0.900233	-0.0862257	0.751541	0.106263	1491.43	1012.3	479.132	533.165	-0.179145	0.52293	-0.743501	0.00148762	0.922647	9.70765e-07	0.751541	0.00123545	0.900233	4.80135e-06	-0.0862257	0.759948	0.106263	0.706231
Agtrap	blue	0.839237	0.0205033	0.819337	0.195741	1432.77	804.295	628.473	175.823	-0.26706	0.335939	-0.655477	0.00798229	0.922537	9.79456e-07	0.819337	0.000185764	0.839237	9.15386e-05	0.0205033	0.942183	0.195741	0.484463
Lst1	blue	0.769216	0.11196	0.858274	0.162365	1334.42	603.015	731.401	-128.385	-0.358495	0.189478	-0.563992	0.0285333	0.922488	9.83433e-07	0.858274	4.2342e-05	0.769216	0.000801123	0.11196	0.691181	0.162365	0.56317
Psmc3ip	blue	0.833496	-0.00333928	0.761011	0.105743	1286.03	771.662	514.364	257.298	-0.24754	0.373731	-0.674738	0.00578964	0.922278	1.00032e-06	0.761011	0.000983926	0.833496	0.000113318	-0.00333928	0.990577	0.105743	0.707611
Apbb1ip	blue	0.806087	0.0649545	0.817435	0.153626	1352.5	721.88	630.616	91.2642	-0.307376	0.265091	-0.614825	0.0147219	0.922201	1.00658e-06	0.817435	0.00019788	0.806087	0.000284413	0.0649545	0.818103	0.153626	0.58463
Twist2	blue	0.830414	0.00651599	0.790361	0.0605373	1285.13	737.22	547.908	189.311	-0.251104	0.366666	-0.670901	0.0061831	0.922005	1.02273e-06	0.790361	0.000453307	0.830414	0.000126666	0.00651599	0.981613	0.0605373	0.830301
D030028A08Rik	blue	0.826847	-0.0143652	0.75161	0.193558	1189.27	713.595	475.678	237.917	-0.240678	0.387544	-0.681193	0.00517252	0.921871	1.0338e-06	0.75161	0.00123346	0.826847	0.0001437	-0.0143652	0.959476	0.193558	0.489444
Golm1	blue	0.907323	-0.10242	0.747072	0.0903995	1496.09	1029.77	466.327	563.439	-0.165458	0.555655	-0.756389	0.00110092	0.921847	1.03586e-06	0.747072	0.00137097	0.907323	3.02633e-06	-0.10242	0.716443	0.0903995	0.748666
Bbs12	blue	0.911171	-0.106607	0.751891	0.112508	1514.99	1039.73	475.254	564.477	-0.157009	0.576282	-0.764623	0.000899712	0.921631	1.054e-06	0.751891	0.00122531	0.911171	2.31908e-06	-0.106607	0.705321	0.112508	0.689739
4930544O15Rik	blue	0.847383	-0.0298321	0.784375	-0.0412341	1293.44	771.165	522.278	248.886	-0.234166	0.400899	-0.687314	0.00463668	0.92148	1.0669e-06	0.784375	0.000535935	0.847383	6.66488e-05	-0.0298321	0.915949	-0.0412341	0.883996
Aebp1	blue	0.863438	-0.0300384	0.790154	-0.0121661	1422.52	866.984	555.541	311.443	-0.229682	0.410237	-0.691765	0.00427538	0.921446	1.06978e-06	0.790154	0.000455975	0.863438	3.37015e-05	-0.0300384	0.91537	-0.0121661	0.965676
Iqcf4	blue	0.865434	-0.0355108	0.788897	0.13171	1422	867.369	554.633	312.736	-0.216463	0.438408	-0.704917	0.00333661	0.921381	1.07544e-06	0.788897	0.000472487	0.865434	3.07796e-05	-0.0355108	0.900017	0.13171	0.639852
Lad1	blue	-0.732567	-0.117129	-0.82207	-0.170983	1072.76	477.525	595.238	-117.713	0.363507	0.182917	0.557817	0.0307154	-0.921324	1.08036e-06	-0.82207	0.000169422	-0.732567	0.00189549	-0.117129	0.677614	-0.170983	0.54234
Fcer1g	blue	0.732744	0.17137	0.850875	0.126609	1276.4	551.722	724.679	-172.957	-0.395913	0.144063	-0.525345	0.044319	0.921258	1.08607e-06	0.850875	5.78498e-05	0.732744	0.00188823	0.17137	0.541412	0.126609	0.652976
Pira7	blue	0.806742	0.0593807	0.808136	0.13265	1321.52	714.349	607.17	107.179	-0.298963	0.279063	-0.622234	0.0132475	0.921197	1.0914e-06	0.808136	0.000266842	0.806742	0.000278696	0.0593807	0.833502	0.13265	0.637444
Apobr	blue	0.852123	-0.021494	0.764811	0.0767602	1353.12	841.184	511.937	329.247	-0.232498	0.40436	-0.688614	0.00452873	0.921112	1.09885e-06	0.764811	0.00089548	0.852123	5.49481e-05	-0.021494	0.939394	0.0767602	0.785699
Mast2	blue	0.860237	-0.0419111	0.748413	0.025405	1358.56	866.564	491.995	374.569	-0.215014	0.441555	-0.705875	0.00327529	0.920889	1.11855e-06	0.748413	0.00132909	0.860237	3.88647e-05	-0.0419111	0.882104	0.025405	0.92839
Ggt6	blue	-0.856612	0.04118	-0.757472	-0.040207	1321.26	823.959	497.303	326.656	0.206952	0.459267	0.713901	0.0027959	-0.920852	1.12184e-06	-0.757472	0.00107256	-0.856612	4.54842e-05	0.04118	0.884147	-0.040207	0.886869
Tlr13	blue	0.917642	-0.129038	0.728861	0.0712014	1507.78	1069.96	437.815	632.149	-0.139183	0.620807	-0.78118	0.000584811	0.920362	1.16635e-06	0.728861	0.00205251	0.917642	1.44124e-06	-0.129038	0.646716	0.0712014	0.800919
Cmtm7	blue	0.880741	-0.0567383	0.762678	0.0717074	1462.01	949.727	512.28	437.447	-0.197899	0.479562	-0.722386	0.00235181	0.920285	1.17353e-06	0.762678	0.000944297	0.880741	1.45899e-05	-0.0567383	0.840821	0.0717074	0.799531
Ints2	blue	0.847369	-0.0308485	0.773887	0.236581	1259.1	762.07	497.033	265.037	-0.236493	0.396099	-0.68344	0.00497046	0.919933	1.20657e-06	0.773887	0.000710047	0.847369	6.66873e-05	-0.0308485	0.913095	0.236581	0.395918
Card11	blue	0.907417	-0.0970728	0.748258	0.0976812	1525.33	1045.51	479.817	565.692	-0.166582	0.552934	-0.753343	0.00118398	0.919926	1.20727e-06	0.748258	0.00133388	0.907417	3.00695e-06	-0.0970728	0.730726	0.0976812	0.729097
Gpsm3	blue	0.906368	-0.0940287	0.7611	0.147827	1512.69	1023.49	489.206	534.283	-0.170818	0.542735	-0.749014	0.00131069	0.919832	1.21621e-06	0.7611	0.000981785	0.906368	3.22721e-06	-0.0940287	0.738895	0.147827	0.59905
Rarb	blue	-0.915588	0.123086	-0.735491	-0.0749656	1486.89	1045.29	441.609	603.676	0.148532	0.597289	0.771193	0.000761486	-0.919726	1.2264e-06	-0.735491	0.00177854	-0.915588	1.68292e-06	0.123086	0.662095	-0.0749656	0.790605
4632434I11Rik	blue	0.880735	-0.0937762	0.729794	0.0195065	1299.12	877.662	421.456	456.206	-0.17334	0.536702	-0.74629	0.00139586	0.91963	1.23564e-06	0.729794	0.00201205	0.880735	1.45945e-05	-0.0937762	0.739573	0.0195065	0.94499
Mtap1s	blue	0.914044	-0.11957	0.725933	0.0746265	1504.6	1064.04	440.564	623.474	-0.145356	0.60524	-0.774155	0.000705093	0.919511	1.24722e-06	0.725933	0.00218381	0.914044	1.88622e-06	-0.11957	0.671242	0.0746265	0.791533
Ap1g2	blue	0.876138	-0.0615373	0.751568	0.10141	1375.53	897.91	477.621	420.288	-0.201102	0.472333	-0.718069	0.00257005	0.919171	1.28078e-06	0.751568	0.00123466	0.876138	1.84488e-05	-0.0615373	0.827537	0.10141	0.719134
Kif20a	blue	0.846072	-0.028459	0.758076	0.0683682	1304.79	805.214	499.581	305.633	-0.224577	0.421003	-0.69457	0.00405944	0.919147	1.2832e-06	0.758076	0.00105699	0.846072	7.02271e-05	-0.028459	0.919806	0.0683682	0.808703
0610042G04Rik	blue	0.890965	-0.0952044	0.752493	0.159712	1393	927.114	465.888	461.227	-0.167139	0.55159	-0.751637	0.00123268	0.918775	1.3208e-06	0.752493	0.00120804	0.890965	8.35826e-06	-0.0952044	0.735737	0.159712	0.569648
Cyp4a10	blue	-0.725086	-0.160663	-0.839556	-0.120224	1146.81	493.303	653.512	-160.209	0.406241	0.132954	0.512477	0.0507882	-0.918718	1.32665e-06	-0.839556	9.04375e-05	-0.725086	0.00222304	-0.160663	0.567322	-0.120224	0.669535
Gpr120	blue	0.874926	-0.0719791	0.750619	0.0970554	1334.51	870.054	464.459	405.595	-0.194522	0.487241	-0.724013	0.00227348	0.918536	1.34553e-06	0.750619	0.0012625	0.874926	1.95938e-05	-0.0719791	0.798786	0.0970554	0.730773
Pih1d2	blue	0.874486	-0.08593	0.731272	-0.0288806	1313.43	870.945	442.49	428.455	-0.175878	0.530661	-0.742537	0.00152047	0.918415	1.35813e-06	0.731272	0.00194924	0.874486	2.00246e-05	-0.08593	0.76075	-0.0288806	0.918621
Pdp1	blue	0.881429	-0.0717065	0.743631	0.00551481	1410.3	933.82	476.479	457.341	-0.181754	0.516792	-0.736425	0.00174245	0.918179	1.38304e-06	0.743631	0.00148325	0.881429	1.40757e-05	-0.0717065	0.799533	0.00551481	0.984438
Noxa1	blue	0.765513	0.0923322	0.8196	0.00612352	1169.52	564.724	604.799	-40.0748	-0.332066	0.226586	-0.585909	0.0217222	0.917975	1.40497e-06	0.8196	0.000184136	0.765513	0.000879879	0.0923322	0.743458	0.00612352	0.98272
Fanca	blue	0.755084	0.110859	0.821416	0.16605	1166.22	552.088	614.134	-62.0466	-0.342266	0.211764	-0.575564	0.0247618	0.91783	1.4207e-06	0.821416	0.000173223	0.755084	0.0011359	0.110859	0.694082	0.16605	0.554221
Crtap	blue	0.913187	-0.108281	0.743851	0.112446	1533.11	1064.55	468.559	595.993	-0.152601	0.587169	-0.765183	0.000887179	0.917784	1.42569e-06	0.743851	0.00147585	0.913187	2.00762e-06	-0.108281	0.700889	0.112446	0.689901
Armc3	blue	0.794796	0.0455242	0.791431	0.16341	1205.85	651.165	554.69	96.4749	-0.290042	0.294347	-0.62769	0.0122371	0.917732	1.43134e-06	0.791431	0.000439696	0.794796	0.000399055	0.0455242	0.872014	0.16341	0.560624
Ilf3	blue	0.900085	-0.0818434	0.77109	0.15009	1508.42	994.874	513.543	481.33	-0.179037	0.523185	-0.738473	0.00166533	0.91751	1.4558e-06	0.77109	0.000763516	0.900085	4.84613e-06	-0.0818434	0.771843	0.15009	0.593407
Ncapg2	blue	0.777976	0.108718	0.83996	0.138046	1333.92	644.035	689.883	-45.8487	-0.341277	0.213173	-0.575957	0.0246408	0.917234	1.48683e-06	0.83996	8.90592e-05	0.777976	0.000637401	0.108718	0.699732	0.138046	0.62369
Dbf4	blue	0.861123	-0.0597995	0.734239	-0.00427905	1316.54	851.539	464.997	386.542	-0.192569	0.491709	-0.724493	0.00225082	0.917062	1.5064e-06	0.734239	0.0018279	0.861123	3.73736e-05	-0.0597995	0.832342	-0.00427905	0.987925
Rcor2	blue	0.865169	-0.0500888	0.763686	0.077158	1365.66	864.624	501.038	363.586	-0.205532	0.462421	-0.711485	0.00293386	0.917017	1.51149e-06	0.763686	0.000920969	0.865169	3.11546e-05	-0.0500888	0.859294	0.077158	0.784612
Gm13154	blue	0.747327	0.134922	0.856195	0.318271	1239.75	532.881	706.872	-173.99	-0.370515	0.173992	-0.546385	0.0350841	0.9169	1.525e-06	0.856195	4.63012e-05	0.747327	0.0013629	0.134922	0.631641	0.318271	0.24764
Fst	blue	0.755731	0.091543	0.792124	0.04402	1080.81	534.256	546.553	-12.2967	-0.345435	0.207287	-0.571285	0.0261093	0.91672	1.54593e-06	0.792124	0.000431057	0.755731	0.00111844	0.091543	0.745584	0.04402	0.876213
Evl	blue	0.736576	0.173385	0.85544	0.148776	1304.61	566.976	737.631	-170.654	-0.396131	0.143823	-0.520292	0.0467817	0.916423	1.5809e-06	0.85544	4.78135e-05	0.736576	0.00173667	0.173385	0.536594	0.148776	0.596682
Mmgt2	blue	0.81583	0.00150599	0.774548	0.0594239	1167.19	670.475	496.711	173.764	-0.251561	0.365765	-0.664848	0.00684633	0.916409	1.58259e-06	0.774548	0.000697878	0.81583	0.000208605	0.00150599	0.99575	0.0594239	0.833382
B430306N03Rik	blue	0.860847	-0.0409606	0.756202	0.136186	1344.43	855.563	488.872	366.691	-0.206001	0.461377	-0.710275	0.00300496	0.916277	1.59843e-06	0.756202	0.00110588	0.860847	3.78323e-05	-0.0409606	0.884761	0.136186	0.62842
Srxn1	blue	0.918754	-0.14489	0.713474	0.0357236	1464	1055.34	408.657	646.682	-0.12788	0.649699	-0.788322	0.000480186	0.916202	1.60741e-06	0.713474	0.00281987	0.918754	1.32296e-06	-0.14489	0.606409	0.0357236	0.899421
Rhoq	blue	0.909375	-0.109215	0.740401	0.0283492	1476.57	1022.23	454.339	567.887	-0.155298	0.580496	-0.760896	0.000986725	0.916194	1.60835e-06	0.740401	0.00159526	0.909375	2.62959e-06	-0.109215	0.69842	0.0283492	0.920114
Ada	blue	0.86413	-0.0205746	0.776918	0.140321	1437.01	894.632	542.373	352.258	-0.223761	0.422737	-0.692339	0.00423043	0.9161	1.61978e-06	0.776918	0.000655592	0.86413	3.26638e-05	-0.0205746	0.941982	0.140321	0.617925
Epsti1	blue	0.824614	0.00507527	0.766329	0.22838	1205.56	712.628	492.933	219.695	-0.255152	0.358729	-0.660739	0.00732759	0.915891	1.64536e-06	0.766329	0.000861994	0.824614	0.000155295	0.00507527	0.985678	0.22838	0.412968
2700007P21Rik	blue	0.887198	-0.108832	0.727769	0.0635221	1338.09	910.267	427.82	482.448	-0.155863	0.579105	-0.759981	0.0010091	0.915843	1.6512e-06	0.727769	0.00210072	0.887198	1.03262e-05	-0.108832	0.699431	0.0635221	0.822055
Serpinb6d	blue	0.810377	0.0532696	0.835519	0.123215	1374.96	704.477	670.479	33.998	-0.299946	0.277407	-0.615801	0.0145208	0.915747	1.66312e-06	0.835519	0.000105204	0.810377	0.000248658	0.0532696	0.850448	0.123215	0.66176
Fabp3	blue	0.751382	0.0898154	0.8102	-0.00359212	1060.93	491.07	569.865	-78.794	-0.341135	0.213376	-0.574413	0.0251189	0.915548	1.68803e-06	0.8102	0.00025005	0.751382	0.0012401	0.0898154	0.750243	-0.00359212	0.989863
Chst1	blue	0.789649	0.0741681	0.844637	0.114472	1330.15	632.611	697.537	-64.9261	-0.324456	0.238058	-0.590993	0.0203369	0.915449	1.70048e-06	0.844637	7.43215e-05	0.789649	0.000462553	0.0741681	0.792788	0.114472	0.684576
B230217C12Rik	blue	0.89505	-0.0938567	0.750306	0.036727	1422.74	956.743	465.994	490.749	-0.171433	0.541261	-0.74391	0.00147389	0.915343	1.71398e-06	0.750306	0.00127176	0.89505	6.58784e-06	-0.0938567	0.739357	0.036727	0.89661
Hist2h2bb	blue	0.71206	0.158326	0.826236	-0.00367537	1129.03	477.037	651.994	-174.957	-0.386648	0.154546	-0.528229	0.0429567	0.914878	1.77406e-06	0.826236	0.000146798	0.71206	0.00290051	0.158326	0.573046	-0.00367537	0.989628
Cd34	blue	0.770531	0.0965804	0.834665	0.0931859	1237.7	578.438	659.259	-80.8204	-0.329614	0.230243	-0.584995	0.0219787	0.914609	1.80961e-06	0.834665	0.00010857	0.770531	0.000774572	0.0965804	0.732046	0.0931859	0.741161
Fam164a	blue	0.867461	-0.0380915	0.791048	0.0826395	1413.47	863.232	550.239	312.993	-0.224009	0.422209	-0.690476	0.00437764	0.914484	1.82627e-06	0.791048	0.000444527	0.867461	2.80304e-05	-0.0380915	0.892788	0.0826395	0.769679
Taf1c	blue	0.926418	-0.138275	0.73711	0.068884	1540.81	1098.22	442.589	655.631	-0.130796	0.642198	-0.783531	0.0005485	0.914327	1.8475e-06	0.73711	0.00171633	0.926418	7.08025e-07	-0.138275	0.623108	0.068884	0.807285
Cenpt	blue	0.92257	-0.141024	0.718851	0.0879227	1504.09	1086.44	417.651	668.79	-0.127619	0.650371	-0.786683	0.000502731	0.914302	1.8509e-06	0.718851	0.00252935	0.92257	9.76841e-07	-0.141024	0.616148	0.0879227	0.755356
Cxcr6	blue	0.849059	0.0005839	0.795943	0.0879112	1393.15	829.926	563.223	266.703	-0.246718	0.375371	-0.667082	0.00659536	0.9138	1.9201e-06	0.795943	0.000385925	0.849059	6.22977e-05	0.0005839	0.998352	0.0879112	0.755387
Ric8	blue	0.934126	-0.155958	0.725215	0.0855722	1543.91	1125.29	418.624	706.667	-0.117943	0.675488	-0.795654	0.000389193	0.913597	1.94878e-06	0.725215	0.00221702	0.934126	3.51466e-07	-0.155958	0.578871	0.0855722	0.761719
Mobkl2a	blue	0.824247	0.0266603	0.805307	0.148636	1326.18	743.047	583.138	159.909	-0.275117	0.320997	-0.638208	0.0104586	0.913325	1.98762e-06	0.805307	0.00029134	0.824247	0.000157269	0.0266603	0.924861	0.148636	0.597029
Ccng1	blue	0.897412	-0.100885	0.747565	0.0824908	1394.3	947.808	446.491	501.316	-0.167905	0.549741	-0.745355	0.0014261	0.913259	1.99711e-06	0.747565	0.00135544	0.897412	5.71546e-06	-0.100885	0.720537	0.0824908	0.770083
Fbxo5	blue	0.90364	-0.0968924	0.739438	0.0963713	1479.45	1021.61	457.837	563.774	-0.160031	0.568868	-0.752607	0.00120479	0.912638	2.08879e-06	0.739438	0.00162997	0.90364	3.86318e-06	-0.0968924	0.73121	0.0963713	0.732606
Ccnd3	blue	0.908814	-0.136754	0.708639	0.00500902	1406.41	1008.9	397.507	611.391	-0.129447	0.645664	-0.782507	0.000564078	0.911954	2.19366e-06	0.708639	0.00310331	0.908814	2.73359e-06	-0.136754	0.626973	0.00500902	0.985865
Mical1	blue	0.912605	-0.110911	0.738824	0.111454	1511.56	1059.25	452.311	606.939	-0.151705	0.58939	-0.760208	0.0010035	0.911914	2.19997e-06	0.738824	0.00165239	0.912605	2.09365e-06	-0.110911	0.693945	0.111454	0.692512
Spag5	blue	0.719394	0.161041	0.827908	0.0781973	1151.18	501.081	650.095	-149.014	-0.395566	0.144447	-0.515955	0.0489749	0.911522	2.26218e-06	0.827908	0.000138448	0.719394	0.00250143	0.161041	0.566399	0.0781973	0.781775
2410022L05Rik	blue	0.903591	-0.120033	0.714995	0.0186574	1398.52	990.12	408.4	581.72	-0.141838	0.614092	-0.769456	0.000796229	0.911294	2.29904e-06	0.714995	0.0027351	0.903591	3.87552e-06	-0.120033	0.670035	0.0186574	0.947381
Naa40	blue	0.907395	-0.145627	0.712699	0.0506841	1373.53	981.226	392.303	588.923	-0.126194	0.654048	-0.784776	0.000530034	0.91097	2.35225e-06	0.712699	0.00286385	0.907395	3.0115e-06	-0.145627	0.604558	0.0506841	0.857637
S100g	blue	0.774963	0.058995	0.78573	0.00677457	1061.69	555.549	506.143	49.4059	-0.322118	0.241653	-0.588788	0.0209291	0.910906	2.36292e-06	0.78573	0.000516231	0.774963	0.000690316	0.058995	0.834569	0.00677457	0.980883
Hvcn1	blue	0.831357	0.0165573	0.799901	0.192836	1325.31	758.601	566.71	191.891	-0.265726	0.338451	-0.644759	0.0094574	0.910484	2.43399e-06	0.799901	0.000343282	0.831357	0.000122453	0.0165573	0.953298	0.192836	0.491098
Id1	blue	0.825911	-0.0172951	0.757556	0.0535571	1174.71	702.288	472.419	229.869	-0.226722	0.41646	-0.683623	0.00495423	0.910345	2.45783e-06	0.757556	0.00107038	0.825911	0.000148468	-0.0172951	0.951219	0.0535571	0.84965
Sash3	blue	0.905281	-0.114095	0.722527	0.045322	1450.9	1022.03	428.874	593.155	-0.146706	0.601856	-0.763425	0.000926976	0.91013	2.49513e-06	0.722527	0.00234492	0.905281	3.46927e-06	-0.114095	0.685567	0.045322	0.872578
Hcst	blue	0.738432	0.139716	0.824644	0.099195	1188.49	545.406	643.088	-97.6813	-0.366945	0.178502	-0.543011	0.0364583	0.909956	2.52571e-06	0.824644	0.000155131	0.738432	0.00166684	0.139716	0.619457	0.099195	0.725048
Cyp4a31	blue	-0.744624	-0.120936	-0.815641	-0.12461	1092.11	514.765	577.344	-62.5799	0.369185	0.175663	0.540653	0.0374423	-0.909837	2.54657e-06	-0.815641	0.000209898	-0.744624	0.00145011	-0.120936	0.667682	-0.12461	0.658145
Tmem209	blue	0.888839	-0.103888	0.72197	-0.073338	1332.45	919.286	413.168	506.117	-0.162359	0.563183	-0.747263	0.00136491	0.909622	2.58493e-06	0.72197	0.00237216	0.888839	9.42634e-06	-0.103888	0.712539	-0.073338	0.795061
Aass	blue	-0.897234	0.0977407	-0.743392	-0.127608	1419.68	973.687	445.994	527.694	0.165837	0.554737	0.743592	0.00148456	-0.909429	2.61987e-06	-0.743392	0.0014913	-0.897234	5.7777e-06	0.0977407	0.728938	-0.127608	0.650399
Ndc80	blue	0.747575	0.13766	0.847363	0.292611	1250.19	556.408	693.783	-137.375	-0.361087	0.186067	-0.548181	0.0343688	0.909267	2.64933e-06	0.847363	6.67027e-05	0.747575	0.00135513	0.13766	0.62467	0.292611	0.289896
Arhgap30	blue	0.899202	-0.0974047	0.732599	0.112301	1449.75	1003.12	446.633	556.484	-0.1559	0.579012	-0.753102	0.00119078	0.909002	2.69837e-06	0.732599	0.0018942	0.899202	5.12002e-06	-0.0974047	0.729837	0.112301	0.690283
Ddx55	blue	0.783105	0.0296686	0.787059	0.181358	1048.51	547.895	500.614	47.2809	-0.285002	0.303197	-0.623672	0.0129751	0.908674	2.75996e-06	0.787059	0.000497486	0.783105	0.000554944	0.0296686	0.916408	0.181358	0.517723
Pdia4	blue	0.886385	-0.127498	0.710885	0.06116	1272.12	885	387.123	497.878	-0.140252	0.618101	-0.768371	0.000818562	0.908623	2.76962e-06	0.710885	0.00296898	0.886385	1.07973e-05	-0.127498	0.650682	0.06116	0.82858
Kif21b	blue	0.924189	-0.13524	0.742363	0.130677	1527.23	1079.09	448.139	630.951	-0.130036	0.644148	-0.778516	0.000628275	0.908553	2.783e-06	0.742363	0.00152645	0.924189	8.54901e-07	-0.13524	0.630829	0.130677	0.642504
Col27a1	blue	-0.79511	0.00974599	-0.749115	0.0413446	1016.03	577.958	438.073	139.884	0.245292	0.378226	0.663184	0.00703815	-0.908476	2.79767e-06	-0.749115	0.00130759	-0.79511	0.000395419	0.00974599	0.972501	0.0413446	0.883687
Dock11	blue	0.868298	-0.0398182	0.758908	0.0901555	1394.57	898.509	496.058	402.45	-0.208838	0.455092	-0.699122	0.00372755	0.907959	2.89823e-06	0.758908	0.00103585	0.868298	2.69568e-05	-0.0398182	0.887956	0.0901555	0.749325
Mir17hg	blue	0.808037	0.000364158	0.746865	0.0716133	1140.27	665.991	474.28	191.711	-0.248259	0.3723	-0.659641	0.00746057	0.9079	2.90997e-06	0.746865	0.00137752	0.808037	0.00026767	0.000364158	0.998972	0.0716133	0.799789
Hist1h2aa	blue	0.871346	-0.0696569	0.753549	0.0357112	1304.41	845.994	458.419	387.575	-0.185362	0.50836	-0.722427	0.00234978	0.90779	2.93191e-06	0.753549	0.00117821	0.871346	2.33284e-05	-0.0696569	0.80516	0.0357112	0.899456
Slc6a8	blue	0.717558	0.119018	0.777365	-0.0200829	994.731	459.276	535.455	-76.1788	-0.353959	0.195547	-0.553708	0.0322357	0.907667	2.95644e-06	0.777365	0.000647856	0.717558	0.00259694	0.119018	0.67268	-0.0200829	0.943367
Cdk19	blue	0.870574	-0.0548482	0.752414	0.0172725	1310.95	854.609	456.342	398.267	-0.199621	0.475668	-0.707835	0.00315259	0.907456	2.99906e-06	0.752414	0.0012103	0.870574	2.42067e-05	-0.0548482	0.846065	0.0172725	0.951282
Odf2	blue	0.911878	-0.114722	0.745721	0.0824392	1475.18	1023.78	451.397	572.381	-0.150623	0.592079	-0.756542	0.00109689	0.907165	3.0588e-06	0.745721	0.00141419	0.911878	2.20554e-06	-0.114722	0.683921	0.0824392	0.770223
Plscr3	blue	0.847926	-0.0358269	0.775286	0.0277552	1265.46	767.593	497.867	269.726	-0.227969	0.413833	-0.679138	0.0053631	0.907107	3.07081e-06	0.775286	0.000684485	0.847926	6.52142e-05	-0.0358269	0.899131	0.0277552	0.921783
Hells	blue	0.901498	-0.111605	0.738188	0.115307	1425.52	986.402	439.114	547.288	-0.147603	0.599611	-0.759201	0.00102848	0.906804	3.13407e-06	0.738188	0.00167589	0.901498	4.43314e-06	-0.111605	0.692115	0.115307	0.682387
E2f2	blue	0.776293	0.0555907	0.785415	-0.0761053	1107.18	584.422	522.754	61.6689	-0.308184	0.263772	-0.59856	0.0184018	0.906744	3.1467e-06	0.785415	0.000520761	0.776293	0.000666544	0.0555907	0.844004	-0.0761053	0.787488
Ppm1j	blue	0.845682	-0.000411149	0.800278	0.191343	1381.61	810.939	570.675	240.264	-0.24732	0.37417	-0.659206	0.00751382	0.906526	3.19318e-06	0.800278	0.000339434	0.845682	7.13192e-05	-0.000411149	0.99884	0.191343	0.494524
Tbc1d10c	blue	0.861024	-0.0321011	0.787552	0.201664	1374.03	838.072	535.963	302.11	-0.226101	0.417773	-0.680038	0.00527895	0.906139	3.27692e-06	0.787552	0.000490675	0.861024	3.7538e-05	-0.0321011	0.909579	0.201664	0.47107
Pbxip1	blue	0.922595	-0.162692	0.699453	0.0567824	1423.64	1053.93	369.714	684.217	-0.111463	0.69249	-0.794659	0.000400649	0.906121	3.28082e-06	0.699453	0.00370426	0.922595	9.74886e-07	-0.162692	0.562372	0.0567824	0.840699
4930547N16Rik	blue	0.735888	0.0890003	0.790767	0.245189	964.11	456.571	507.539	-50.9688	-0.338041	0.217826	-0.567617	0.0273082	0.905658	3.38367e-06	0.790767	0.000448109	0.735888	0.00176314	0.0890003	0.752443	0.245189	0.378434
P2rx7	blue	0.883847	-0.066487	0.762381	0.100243	1409.13	925.692	483.441	442.251	-0.185808	0.507324	-0.719791	0.00248112	0.905599	3.3969e-06	0.762381	0.000951273	0.883847	1.23861e-05	-0.066487	0.81388	0.100243	0.722249
Tuft1	blue	0.882737	-0.094514	0.72778	-0.0319587	1332.38	907.081	425.297	481.784	-0.16154	0.565182	-0.744012	0.00147047	0.905551	3.40769e-06	0.72778	0.00210024	0.882737	1.31395e-05	-0.094514	0.737591	-0.0319587	0.909979
Fmnl1	blue	0.787854	0.0582155	0.80386	0.0858059	1146.57	599.094	547.475	51.6199	-0.315714	0.251671	-0.589644	0.0206977	0.905359	3.45146e-06	0.80386	0.000304566	0.787854	0.000486542	0.0582155	0.836728	0.0858059	0.761086
Acap1	blue	0.895668	-0.101511	0.73333	0.168111	1393.4	961.443	431.954	529.489	-0.156949	0.576429	-0.748099	0.0013388	0.905048	3.52294e-06	0.73333	0.0018644	0.895668	6.34944e-06	-0.101511	0.718866	0.168111	0.549243
Fam73a	blue	0.837988	-0.0601925	0.725588	-0.0680598	1109.03	711.994	397.033	314.961	-0.210308	0.451852	-0.694736	0.00404696	0.905043	3.52416e-06	0.725588	0.00219969	0.837988	9.59555e-05	-0.0601925	0.831255	-0.0680598	0.809551
Slc30a7	blue	-0.875688	0.0660891	-0.748712	-0.164015	1342.43	890.628	451.799	438.829	0.191926	0.493185	0.71282	0.00285693	-0.904746	3.59384e-06	-0.748712	0.00131992	-0.875688	1.88674e-05	0.0660891	0.814977	-0.164015	0.559154
Gm44	blue	0.812553	0.0189171	0.806097	0.0421978	1231.63	666.946	564.683	102.263	-0.268399	0.33343	-0.63628	0.0107684	0.904679	3.6097e-06	0.806097	0.00028432	0.812553	0.000231979	0.0189171	0.94665	0.0421978	0.881302
G430049J08Rik	blue	0.831019	-0.00787731	0.761226	-0.0741941	1216.19	735.332	480.861	254.471	-0.237767	0.393484	-0.66691	0.00661435	0.904678	3.60995e-06	0.761226	0.000978759	0.831019	0.000123948	-0.00787731	0.977772	-0.0741941	0.792716
Nt5c3l	blue	0.900631	-0.116599	0.725965	0.156985	1396.6	978.557	418.04	560.517	-0.147484	0.599907	-0.757191	0.00107986	0.904675	3.61057e-06	0.725965	0.00218234	0.900631	4.68294e-06	-0.116599	0.679003	0.156985	0.576341
Fhod3	blue	-0.753484	-0.0971928	-0.79668	-0.0370234	1078.27	519.997	558.272	-38.2748	0.321799	0.242146	0.582521	0.0226843	-0.90432	3.69573e-06	-0.79668	0.000377664	-0.753484	0.00118004	-0.0971928	0.730405	-0.0370234	0.895779
Rad54b	blue	0.75729	0.0404381	0.778742	0.0102293	943.08	472.672	470.409	2.26301	-0.298074	0.280564	-0.605996	0.016641	0.904069	3.75672e-06	0.778742	0.000624488	0.75729	0.00107727	0.0404381	0.886222	0.0102293	0.971138
Prmt2	blue	0.925824	-0.140431	0.733238	0.108566	1515.05	1086.97	428.07	658.904	-0.125147	0.656754	-0.778488	0.000628755	0.903635	3.86447e-06	0.733238	0.00186813	0.925824	7.44917e-07	-0.140431	0.617647	0.108566	0.700134
Adhfe1	blue	-0.865941	0.0952296	-0.722149	-0.0234098	1218.65	815.77	402.879	412.891	0.164174	0.558769	0.739415	0.0016308	-0.903589	3.87607e-06	-0.722149	0.0023634	-0.865941	3.00728e-05	0.0952296	0.735669	-0.0234098	0.934002
Arl2bp	blue	0.89717	-0.133144	0.703155	-0.00983567	1327.49	945.155	382.336	562.819	-0.13793	0.623985	-0.765631	0.000877272	0.903561	3.88315e-06	0.703155	0.00345186	0.89717	5.7999e-06	-0.133144	0.636181	-0.00983567	0.972248
Slc24a5	blue	0.712214	0.184243	0.836512	0.193773	1191.11	506.573	684.538	-177.965	-0.40016	0.139422	-0.503341	0.0557849	0.903501	3.89838e-06	0.836512	0.0001014	0.712214	0.00289167	0.184243	0.510969	0.193773	0.488953
Traf3ip3	blue	0.834748	-0.00850073	0.793244	0.201501	1282.35	744.84	537.514	207.326	-0.235155	0.398856	-0.6683	0.00646152	0.903455	3.90982e-06	0.793244	0.000417396	0.834748	0.000108237	-0.00850073	0.976014	0.201501	0.471435
Homer3	blue	0.767471	0.0821027	0.819666	0.109204	1128.43	546.032	582.396	-36.3635	-0.324458	0.238055	-0.578975	0.0237258	0.903433	3.91558e-06	0.819666	0.000183728	0.767471	0.000837497	0.0821027	0.771138	0.109204	0.698449
Laptm5	blue	0.836374	-0.00632983	0.77173	0.15638	1264.77	765.76	499.007	266.753	-0.235622	0.397894	-0.667616	0.00653647	0.903237	3.96544e-06	0.77173	0.000751004	0.836374	0.000101924	-0.00632983	0.982138	0.15638	0.577831
Ncald	blue	-0.850588	0.0529147	-0.73668	-0.0104514	1199.89	764.855	435.037	329.818	0.194701	0.486834	0.70836	0.00312036	-0.90306	4.01109e-06	-0.73668	0.0017327	-0.850588	5.85343e-05	0.0529147	0.851434	-0.0104514	0.970511
Prim1	blue	0.904236	-0.116037	0.728403	0.124829	1416.72	994.586	422.139	572.447	-0.146653	0.601988	-0.756344	0.0011021	0.902997	4.02745e-06	0.728403	0.00207262	0.904236	3.716e-06	-0.116037	0.680473	0.124829	0.657579
Phf23	blue	0.890513	-0.0923117	0.733945	0.085617	1388.48	948.76	439.719	509.04	-0.153211	0.585655	-0.749593	0.00129311	0.902805	4.0777e-06	0.733945	0.00183965	0.890513	8.57683e-06	-0.0923117	0.743513	0.085617	0.761598
Emp3	blue	0.868272	-0.0633636	0.734913	0.107494	1325.19	879.769	445.419	434.35	-0.189193	0.499478	-0.713576	0.0028141	0.902769	4.08712e-06	0.734913	0.00180121	0.868272	2.69895e-05	-0.0633636	0.822492	0.107494	0.70297
Armc10	blue	0.941581	-0.182043	0.699488	0.067628	1518.67	1147.7	370.974	776.721	-0.0906536	0.747981	-0.812061	0.000235667	0.902715	4.10145e-06	0.699488	0.00370183	0.941581	1.63964e-07	-0.182043	0.516115	0.067628	0.810739
Pim2	blue	0.83476	-0.0203977	0.754922	0.0945788	1209.33	744.117	465.215	278.902	-0.227798	0.414193	-0.674703	0.00579308	0.902501	4.1581e-06	0.754922	0.00114032	0.83476	0.00010819	-0.0203977	0.94248	0.0945788	0.737416
Cdc25a	blue	0.895359	-0.112776	0.714222	0.0704698	1354.72	952.565	402.152	550.413	-0.141187	0.615737	-0.761113	0.000981478	0.902299	4.21228e-06	0.714222	0.00277791	0.895359	6.46769e-06	-0.112776	0.689032	0.0704698	0.802928
Fam18a	blue	0.886148	-0.0868188	0.747278	0.256198	1337.03	900.944	436.087	464.857	-0.173941	0.535268	-0.728133	0.00208454	0.902075	4.27325e-06	0.747278	0.00136445	0.886148	1.09384e-05	-0.0868188	0.758343	0.256198	0.356694
Hirip3	blue	0.900914	-0.125504	0.704277	0.111484	1372.87	981.964	390.902	591.062	-0.133791	0.634527	-0.767999	0.000826344	0.901791	4.35138e-06	0.704277	0.00337813	0.900914	4.60011e-06	-0.125504	0.655831	0.111484	0.692435
Mcm7	blue	0.905518	-0.133131	0.705499	0.0873292	1391.91	998.907	393.005	605.902	-0.124406	0.658673	-0.777312	0.000648774	0.901718	4.37149e-06	0.705499	0.00329923	0.905518	3.41516e-06	-0.133131	0.636216	0.0873292	0.756961
Tgfb1	blue	0.738023	0.145894	0.816883	0.173371	1173.34	549.507	623.834	-74.3272	-0.368262	0.17683	-0.533365	0.0406086	0.901627	4.39703e-06	0.816883	0.000201518	0.738023	0.00168205	0.145894	0.60389	0.173371	0.536629
Cyp4a32	blue	-0.758083	-0.0916788	-0.795545	-0.114825	1054.12	531.811	522.305	9.50545	0.340417	0.214404	0.561197	0.0295061	-0.901614	4.40072e-06	-0.795545	0.000390438	-0.758083	0.00105681	-0.0916788	0.745218	-0.114825	0.68365
6030429G01Rik	blue	0.828718	-0.00381242	0.789755	0.0968949	1228.11	709.392	518.721	190.671	-0.245462	0.377887	-0.655843	0.00793531	0.901305	4.48787e-06	0.789755	0.00046116	0.828718	0.000134544	-0.00381242	0.989241	0.0968949	0.731203
Gm10693	blue	0.874479	-0.0492382	0.774622	0.189291	1399.27	894.55	504.723	389.826	-0.196327	0.483129	-0.704774	0.00334585	0.901102	4.54593e-06	0.774622	0.000696515	0.874479	2.0031e-05	-0.0492382	0.861662	0.189291	0.49925
4921506M07Rik	blue	-0.798631	-0.0365198	-0.784929	-0.13838	1161.97	646.718	515.257	131.461	0.277579	0.316509	0.623017	0.0130987	-0.900595	4.69341e-06	-0.784929	0.000527796	-0.798631	0.000356522	-0.0365198	0.89719	-0.13838	0.622842
Klk8	blue	0.792542	0.0581458	0.780919	0.0109759	1165.88	644.422	521.454	122.968	-0.29542	0.285075	-0.605044	0.0168589	0.900463	4.73251e-06	0.780919	0.000588961	0.792542	0.00042592	0.0581458	0.836921	0.0109759	0.969032
Phlda3	blue	0.944946	-0.194794	0.692095	0.0637698	1517.83	1160	357.834	802.166	-0.0763811	0.786734	-0.82405	0.000158337	0.900431	4.74204e-06	0.692095	0.00424953	0.944946	1.12421e-07	-0.194794	0.486622	0.0637698	0.821371
Git1	blue	0.9383	-0.163065	0.71284	0.124862	1542.51	1148.62	393.893	754.725	-0.100961	0.720333	-0.799362	0.000348857	0.900323	4.77454e-06	0.71284	0.00285582	0.9383	2.32015e-07	-0.163065	0.561465	0.124862	0.657493
Ebi3	blue	0.772482	0.104773	0.821329	0.0854765	1235.74	617.167	618.572	-1.40519	-0.328724	0.231579	-0.571394	0.0260743	0.900118	4.83607e-06	0.821329	0.00017373	0.772482	0.00073652	0.104773	0.710186	0.0854765	0.761978
Lzic	blue	0.942501	-0.193675	0.688879	0.0502228	1505.02	1148.15	356.86	791.295	-0.0780021	0.782308	-0.821975	0.000169969	0.899977	4.87885e-06	0.688879	0.00450693	0.942501	1.48216e-07	-0.193675	0.489176	0.0502228	0.858921
Ehd2	blue	0.914653	-0.144714	0.705452	0.0165682	1389.32	1012.7	376.623	636.074	-0.123573	0.660832	-0.776229	0.00066767	0.899802	4.93258e-06	0.705452	0.00330224	0.914653	1.80372e-06	-0.144714	0.606851	0.0165682	0.953267
Tex9	blue	0.87077	-0.074828	0.757535	0.13252	1310.7	847.675	463.028	384.646	-0.18522	0.508692	-0.71453	0.00276082	0.89975	4.94871e-06	0.757535	0.00107091	0.87077	2.39813e-05	-0.074828	0.790981	0.13252	0.637778
Vopp1	blue	0.864025	-0.0497597	0.740957	0.099677	1321.99	864.263	457.732	406.532	-0.192173	0.492618	-0.707434	0.00317739	0.899607	4.99303e-06	0.740957	0.00157553	0.864025	3.28186e-05	-0.0497597	0.86021	0.099677	0.72376
Tmem229b	blue	0.928317	-0.145262	0.730015	0.135355	1519.37	1098.75	420.615	678.138	-0.114025	0.685749	-0.785287	0.000522608	0.899312	5.08528e-06	0.730015	0.00200255	0.928317	6.00129e-07	-0.145262	0.605475	0.135355	0.630537
Vangl1	blue	0.934076	-0.169618	0.701014	0.0856519	1477.91	1108.03	369.884	738.146	-0.0982683	0.727526	-0.801035	0.000331811	0.899303	5.08821e-06	0.701014	0.00359611	0.934076	3.53154e-07	-0.169618	0.545617	0.0856519	0.761503
Tusc3	blue	0.849257	-0.0301623	0.747888	0.125273	1265.27	805.639	459.627	346.012	-0.219276	0.432334	-0.679922	0.00528973	0.899198	5.12152e-06	0.747888	0.00134536	0.849257	6.17998e-05	-0.0301623	0.915021	0.125273	0.656429
Gm13157	blue	0.815002	0.0210691	0.797141	0.107416	1198.8	665.848	532.956	132.892	-0.265717	0.338468	-0.633198	0.0112786	0.898915	5.21197e-06	0.797141	0.000372585	0.815002	0.000214319	0.0210691	0.94059	0.107416	0.703179
Nfatc2	blue	0.823664	0.0260231	0.80056	0.169375	1273.75	722.311	551.439	170.872	-0.263111	0.343405	-0.635474	0.0109001	0.898585	5.31925e-06	0.80056	0.000336576	0.823664	0.000160453	0.0260231	0.926652	0.169375	0.5462
Naaa	blue	0.896684	-0.123152	0.715352	0.0877222	1293.57	921.303	372.272	549.031	-0.141967	0.613766	-0.755887	0.00111428	0.897854	5.5633e-06	0.715352	0.00271552	0.896684	5.97322e-06	-0.123152	0.661923	0.0877222	0.755898
Stk30	blue	0.825604	0.0082547	0.793322	0.138739	1254.23	719.462	534.765	184.697	-0.242167	0.384524	-0.655585	0.00796842	0.897752	5.59804e-06	0.793322	0.000416465	0.825604	0.000150062	0.0082547	0.976708	0.138739	0.621933
Cdyl	blue	0.897262	-0.126114	0.715738	0.113348	1317.53	929.431	388.101	541.33	-0.133571	0.63509	-0.763785	0.000918713	0.897356	5.73501e-06	0.715738	0.00269449	0.897262	5.76783e-06	-0.126114	0.654255	0.113348	0.687528
Gm10499	blue	0.801434	0.035116	0.798276	0.185828	1166.27	634.387	531.887	102.5	-0.272915	0.325042	-0.624094	0.012896	0.89701	5.85678e-06	0.798276	0.000360292	0.801434	0.000327843	0.035116	0.901124	0.185828	0.507276
Trim72	blue	0.758155	0.0871874	0.791455	-0.0256053	1076.12	541.467	534.655	6.81147	-0.31689	0.249813	-0.580043	0.0234085	0.896933	5.88416e-06	0.791455	0.000439392	0.758155	0.00105496	0.0871874	0.757345	-0.0256053	0.927827
Uba6	blue	0.917927	-0.154016	0.718633	0.0602088	1409.94	1017.51	392.431	625.077	-0.109832	0.696791	-0.786945	0.000499072	0.896777	5.93992e-06	0.718633	0.00254065	0.917927	1.41014e-06	-0.154016	0.583664	0.0602088	0.83121
Cmtm3	blue	0.923684	-0.137866	0.720862	0.138891	1491.04	1084.96	406.079	678.88	-0.118164	0.674909	-0.777248	0.000649885	0.895412	6.44751e-06	0.720862	0.00242706	0.923684	8.91441e-07	-0.137866	0.624147	0.138891	0.621547
Calm3	blue	0.939864	-0.191994	0.695525	0.067875	1471.74	1116.2	355.544	760.657	-0.0837054	0.766783	-0.811277	0.000241639	0.894983	6.61428e-06	0.695525	0.00398794	0.939864	1.97101e-07	-0.191994	0.493027	0.067875	0.81006
Ctsk	blue	0.845834	-0.06271	0.721075	0.0988239	1151.66	749.143	402.515	346.627	-0.190824	0.495716	-0.703834	0.00340708	0.894658	6.74289e-06	0.721075	0.00241644	0.845834	7.08927e-05	-0.06271	0.824297	0.0988239	0.72604
Dok3	blue	0.814219	0.0142709	0.801965	0.192136	1215.61	659.503	556.106	103.398	-0.260643	0.348116	-0.633882	0.0111638	0.894525	6.79633e-06	0.801965	0.000322632	0.814219	0.000219838	0.0142709	0.959741	0.192136	0.492701
Nos3	blue	0.898071	-0.127874	0.69588	0.0643169	1330.38	956.437	373.941	582.496	-0.125763	0.655161	-0.768595	0.000813925	0.894358	6.86364e-06	0.69588	0.00396158	0.898071	5.48978e-06	-0.127874	0.649712	0.0643169	0.819862
4933415F23Rik	blue	0.819437	-0.00602185	0.794004	0.168456	1206.81	667.296	539.514	127.783	-0.254105	0.360772	-0.640051	0.0101689	0.894156	6.94582e-06	0.794004	0.000408324	0.819437	0.000185143	-0.00602185	0.983007	0.168456	0.548413
Gyg	blue	0.903541	-0.126776	0.700336	0.0400348	1371.31	989.555	381.752	607.803	-0.129241	0.646194	-0.764615	0.00089988	0.893856	7.06974e-06	0.700336	0.00364277	0.903541	3.88808e-06	-0.126776	0.652545	0.0400348	0.88735
Nckap1l	blue	0.80451	0.0492377	0.791866	0.133411	1226.22	685.556	540.66	144.895	-0.277845	0.316026	-0.615727	0.0145358	0.893573	7.18817e-06	0.791866	0.00043426	0.80451	0.000298567	0.0492377	0.861663	0.133411	0.635499
Nans	blue	0.894848	-0.139299	0.685163	0.0470273	1268.33	922.463	345.869	576.594	-0.129184	0.64634	-0.763773	0.000918969	0.892957	7.45125e-06	0.685163	0.0048197	0.894848	6.66743e-06	-0.139299	0.620513	0.0470273	0.867822
Cdkn2b	blue	0.768356	0.0820889	0.789731	0.0782622	1139.25	592.481	546.768	45.712	-0.308121	0.263875	-0.584737	0.0220513	0.892858	7.49426e-06	0.789731	0.000461483	0.768356	0.000818886	0.0820889	0.771175	0.0782622	0.781598
Il17rb	blue	0.907219	-0.15609	0.687535	0.103581	1312.6	969.653	342.943	626.71	-0.11458	0.684293	-0.7774	0.000647262	0.89198	7.88546e-06	0.687535	0.00461816	0.907219	3.04766e-06	-0.15609	0.578545	0.103581	0.713355
LOC100502818	blue	0.795564	-0.0140819	0.736899	-0.211059	969.211	568.273	400.939	167.334	-0.236329	0.396438	-0.655592	0.00796754	0.89192	7.91262e-06	0.736899	0.00172434	0.795564	0.000390221	-0.0140819	0.960274	-0.211059	0.450201
Dsel	blue	0.897323	-0.111433	0.729691	0.0334672	1367.11	955.587	411.518	544.07	-0.140725	0.616904	-0.750715	0.00125966	0.891439	8.13461e-06	0.729691	0.00201647	0.897323	5.74631e-06	-0.111433	0.692569	0.0334672	0.905747
Lgals1	blue	0.8773	-0.0967868	0.719093	0.0866409	1239.21	854.883	384.323	470.56	-0.167753	0.550107	-0.723643	0.00229112	0.891396	8.15485e-06	0.719093	0.00251689	0.8773	1.74027e-05	-0.0967868	0.731493	0.0866409	0.758824
Tlr1	blue	0.831385	-0.0105086	0.764194	-0.0818131	1198.16	729.793	468.37	261.422	-0.235502	0.39814	-0.655581	0.00796889	0.891083	8.30211e-06	0.764194	0.000909379	0.831385	0.000122329	-0.0105086	0.97035	-0.0818131	0.771925
Hist2h3c1	blue	0.801309	0.0184747	0.802706	0.109792	1164.45	614.547	549.908	64.6387	-0.265082	0.339667	-0.625822	0.0125759	0.890904	8.3876e-06	0.802706	0.000315461	0.801309	0.000329082	0.0184747	0.947896	0.109792	0.696897
Apitd1	blue	0.832596	-0.0434623	0.732908	0.125784	1144.33	719.221	425.113	294.108	-0.199231	0.476548	-0.691505	0.00429587	0.890736	8.4684e-06	0.732908	0.00188155	0.832596	0.00011709	-0.0434623	0.87777	0.125784	0.655107
Rgs19	blue	0.926052	-0.152916	0.706215	0.114726	1466.13	1087.35	378.78	708.571	-0.103878	0.712564	-0.7868	0.000501101	0.890678	8.49663e-06	0.706215	0.00325375	0.926052	7.30528e-07	-0.152916	0.586387	0.114726	0.683911
Rrm1	blue	0.934751	-0.181668	0.692154	0.127306	1444.02	1095.8	348.224	747.575	-0.0882007	0.754604	-0.802456	0.000317866	0.890657	8.50666e-06	0.692154	0.00424491	0.934751	3.30835e-07	-0.181668	0.516995	0.127306	0.651178
1110021J02Rik	blue	0.89075	-0.140098	0.708953	0.160273	1239.39	880.419	358.972	521.447	-0.124217	0.659163	-0.766076	0.000867501	0.890294	8.68426e-06	0.708953	0.00308426	0.89075	8.46169e-06	-0.140098	0.61849	0.160273	0.568275
Agap2	blue	0.795528	-0.026552	0.709916	-0.0126272	932.711	569.662	363.05	206.612	-0.228192	0.413363	-0.661924	0.00718617	0.890116	8.77196e-06	0.709916	0.00302631	0.795528	0.000390634	-0.026552	0.925165	-0.0126272	0.964376
Omp	blue	0.864036	-0.0796205	0.758225	0.136374	1238.93	791.403	447.525	343.878	-0.176427	0.529359	-0.713478	0.00281965	0.889905	8.87744e-06	0.758225	0.00105318	0.864036	3.28025e-05	-0.0796205	0.777894	0.136374	0.627942
Fam118a	blue	0.856873	-0.0662874	0.745443	0.0755113	1187.32	766.765	420.552	346.212	-0.202928	0.468236	-0.686726	0.00468611	0.889654	9.00436e-06	0.745443	0.00142323	0.856873	4.49782e-05	-0.0662874	0.81443	0.0755113	0.789112
Cyp3a16	blue	-0.697066	-0.130283	-0.78885	-0.150262	878.308	390.926	487.382	-96.4554	0.382579	0.159307	0.506515	0.0540097	-0.889094	9.29226e-06	-0.78885	0.000473114	-0.697066	0.00387467	-0.130283	0.643514	-0.150262	0.592977
Pram1	blue	0.913047	-0.150769	0.695001	0.106204	1377.04	1016.77	360.268	656.501	-0.104615	0.710606	-0.784228	0.000538094	0.888843	9.424e-06	0.695001	0.00402701	0.913047	2.028e-06	-0.150769	0.591715	0.106204	0.706389
Rusc2	blue	0.806856	0.00711605	0.739223	0.0217135	1134.06	673.497	460.559	212.938	-0.240635	0.387632	-0.648075	0.00897993	0.88871	9.49478e-06	0.739223	0.0016378	0.806856	0.000277712	0.00711605	0.97992	0.0217135	0.938776
Tax1bp3	blue	0.944452	-0.207212	0.675617	0.0158599	1465.38	1138.42	326.959	811.464	-0.0621644	0.825804	-0.826363	0.000146153	0.888527	9.59213e-06	0.675617	0.00570236	0.944452	1.18998e-07	-0.207212	0.45869	0.0158599	0.955263
Plcg2	blue	0.921195	-0.145433	0.714983	0.161732	1444.4	1058.66	385.73	672.935	-0.109672	0.697212	-0.778629	0.000626388	0.888301	9.71369e-06	0.714983	0.00273579	0.921195	1.09159e-06	-0.145433	0.605046	0.161732	0.564711
Slc17a2	blue	-0.9306	0.198416	-0.676192	-0.00102138	1377.68	1055.78	321.905	733.873	0.0803749	0.775839	0.807575	0.000271563	-0.88795	9.90526e-06	-0.676192	0.00564581	-0.9306	4.89005e-07	0.198416	0.478392	-0.00102138	0.997118
Dtx2	blue	0.924784	-0.168266	0.689702	0.0862749	1426.59	1069.83	356.762	713.072	-0.0858864	0.760868	-0.801953	0.000322745	0.887839	9.96612e-06	0.689702	0.00443994	0.924784	8.13369e-07	-0.168266	0.548871	0.0862749	0.759815
Rhebl1	blue	0.893722	-0.118187	0.713117	0.111927	1284.95	912.36	372.587	539.773	-0.139603	0.619742	-0.748103	0.00133869	0.887706	1.00402e-05	0.713117	0.00284005	0.893722	7.12534e-06	-0.118187	0.674851	0.111927	0.691268
Lgi2	blue	0.871102	-0.0907806	0.715423	0.0179032	1204.35	824.548	379.806	444.742	-0.169238	0.54653	-0.718459	0.00254971	0.887697	1.00454e-05	0.715423	0.00271165	0.871102	2.36039e-05	-0.0907806	0.747638	0.0179032	0.949506
Mlec	blue	0.924632	-0.191482	0.6716	0.103125	1365.48	1044.12	321.355	722.767	-0.0763012	0.786953	-0.811302	0.000241453	0.887603	1.00976e-05	0.6716	0.00610991	0.924632	8.23856e-07	-0.191482	0.494204	0.103125	0.714567
Cacnb3	blue	0.855215	-0.0500357	0.775739	0.209093	1276.79	782.13	494.664	287.466	-0.20207	0.470158	-0.685341	0.00480431	0.887411	1.02052e-05	0.775739	0.000676358	0.855215	4.82726e-05	-0.0500357	0.859442	0.209093	0.454529
Usp8	blue	0.863014	-0.0799363	0.754965	0.0807652	1229.94	782.631	447.309	335.321	-0.181169	0.518166	-0.705856	0.00327649	0.887025	1.04246e-05	0.754965	0.00113915	0.863014	3.43513e-05	-0.0799363	0.777034	0.0807652	0.774777
C1ql3	blue	0.843046	-0.058252	0.734642	-0.0738425	1121.64	721.99	399.649	322.341	-0.202784	0.468558	-0.684089	0.00491325	0.886872	1.05129e-05	0.734642	0.00181189	0.843046	7.90886e-05	-0.058252	0.836627	-0.0738425	0.793679
Gys1	blue	0.944471	-0.205639	0.668787	0.047522	1466.67	1147.54	319.124	828.417	-0.0632041	0.822933	-0.823664	0.00016045	0.886868	1.0515e-05	0.668787	0.00640864	0.944471	1.18741e-07	-0.205639	0.462183	0.047522	0.866443
Gm3366	blue	0.772696	0.0241409	0.74713	0.21701	903.061	502.616	400.445	102.17	-0.282913	0.306909	-0.603811	0.0171443	0.886724	1.0599e-05	0.74713	0.00136911	0.772696	0.000732432	0.0241409	0.931945	0.21701	0.437224
Gse1	blue	0.93389	-0.190856	0.683501	0.168996	1413.51	1080.96	332.554	748.407	-0.076006	0.78776	-0.810622	0.000246728	0.886628	1.06545e-05	0.683501	0.00496499	0.93389	3.59497e-07	-0.190856	0.495644	0.168996	0.547111
Tspyl2	blue	0.881109	-0.109538	0.738564	0.0930015	1258.28	846.939	411.344	435.595	-0.162407	0.563067	-0.724138	0.00226757	0.886545	1.07034e-05	0.738564	0.00166197	0.881109	1.43133e-05	-0.109538	0.697567	0.0930015	0.741657
Slc25a33	blue	0.776715	0.0441848	0.749725	0.0905793	1029.02	573.793	455.232	118.561	-0.271522	0.327615	-0.614998	0.0146861	0.88652	1.07179e-05	0.749725	0.00128914	0.776715	0.000659127	0.0441848	0.875753	0.0905793	0.748181
Rpgrip1l	blue	0.91975	-0.146708	0.712922	0.0878356	1406.26	1032.66	373.605	659.053	-0.113401	0.68739	-0.773118	0.000724443	0.886519	1.07187e-05	0.712922	0.00285116	0.91975	1.22403e-06	-0.146708	0.601851	0.0878356	0.755591
Gm10324	blue	0.913706	-0.145425	0.706566	-0.0139596	1367.35	998.395	368.952	629.444	-0.11688	0.678266	-0.769175	0.00080197	0.886055	1.0994e-05	0.706566	0.00323161	0.913706	1.9334e-06	-0.145425	0.605066	-0.0139596	0.960619
Blnk	blue	0.753021	0.108785	0.803722	0.0568929	1088.09	530.219	557.874	-27.6545	-0.320019	0.244909	-0.565917	0.0278777	0.885936	1.10655e-05	0.803722	0.000305856	0.753021	0.00119305	0.108785	0.699556	0.0568929	0.840393
Rasl11a	blue	0.93826	-0.204356	0.677086	0.0373195	1440.44	1111.44	328.995	782.449	-0.0616054	0.827349	-0.824263	0.000157185	0.885868	1.11066e-05	0.677086	0.00555875	0.93826	2.32967e-07	-0.204356	0.465042	0.0373195	0.89495
Tmem56	blue	-0.928582	0.194446	-0.684155	-0.129236	1363.72	1038.75	324.97	713.784	0.0801695	0.776399	0.80567	0.000288099	-0.88584	1.11236e-05	-0.684155	0.00490741	-0.928582	5.86263e-07	0.194446	0.487416	-0.129236	0.646207
Trim27	blue	0.942512	-0.208493	0.67133	0.0477118	1453.74	1131.27	322.468	808.807	-0.0596569	0.832737	-0.825768	0.00014921	0.885425	1.13772e-05	0.67133	0.00613807	0.942512	1.48034e-07	-0.208493	0.455855	0.0477118	0.865914
1810009A15Rik	blue	0.908524	-0.182899	0.662133	-0.00107757	1268.8	960.181	308.619	651.562	-0.0830447	0.768578	-0.802017	0.000322119	0.885062	1.1603e-05	0.662133	0.00716139	0.908524	2.78847e-06	-0.182899	0.51411	-0.00107757	0.996959
Cpxm1	blue	0.844539	-0.0649689	0.723667	0.0781483	1121.3	738.545	382.751	355.794	-0.195359	0.485334	-0.689635	0.00444535	0.884994	1.16459e-05	0.723667	0.00228998	0.844539	7.46083e-05	-0.0649689	0.818064	0.0781483	0.781909
2010109A12Rik	blue	0.747149	0.0713099	0.794304	-0.0940273	959.914	466.056	493.858	-27.8019	-0.314493	0.253611	-0.570282	0.0264332	0.884774	1.17847e-05	0.794304	0.000404797	0.747149	0.00136852	0.0713099	0.800622	-0.0940273	0.738898
Smc2	blue	0.931646	-0.17564	0.690026	0.0782723	1424.08	1081.71	342.374	739.332	-0.0887125	0.753221	-0.79584	0.000387079	0.884553	1.1926e-05	0.690026	0.00441374	0.931646	4.44162e-07	-0.17564	0.531227	0.0782723	0.78157
Aldh3b1	blue	0.945564	-0.208015	0.670264	0.0858841	1474.45	1155.33	319.117	836.216	-0.0593206	0.833668	-0.825221	0.000152067	0.884542	1.19331e-05	0.670264	0.00625042	0.945564	1.04617e-07	-0.208015	0.45691	0.0858841	0.760874
Tmem170	blue	0.892766	-0.156164	0.676663	-0.0187354	1227.02	897.518	329.503	568.016	-0.102415	0.716457	-0.781873	0.000573907	0.884288	1.20969e-05	0.676663	0.00559982	0.892766	7.53464e-06	-0.156164	0.578361	-0.0187354	0.947161
Fermt3	blue	0.750215	0.119579	0.816624	0.189243	1143.97	554.974	588.997	-34.0234	-0.340676	0.214032	-0.543596	0.0362171	0.884272	1.21074e-05	0.816624	0.000203239	0.750215	0.00127447	0.119579	0.671217	0.189243	0.499361
Ap1s3	blue	0.840581	-0.085579	0.678664	-0.0266926	1080.3	731.666	348.633	383.033	-0.169991	0.544719	-0.714234	0.00277729	0.884225	1.21381e-05	0.678664	0.00540783	0.840581	8.69732e-05	-0.085579	0.761701	-0.0266926	0.92477
Nin	blue	0.898022	-0.118948	0.722441	0.0684573	1341.57	947.275	394.292	552.982	-0.137855	0.624175	-0.745926	0.00140756	0.883781	1.24298e-05	0.722441	0.00234909	0.898022	5.50647e-06	-0.118948	0.672863	0.0684573	0.808458
Nbeal2	blue	0.909643	-0.168347	0.702179	0.0135578	1302.06	953.067	348.994	604.073	-0.10313	0.714554	-0.780607	0.000593945	0.883737	1.24593e-05	0.702179	0.00351702	0.909643	2.58121e-06	-0.168347	0.548674	0.0135578	0.961752
Mtbp	blue	0.943544	-0.19964	0.679306	0.0948041	1464.25	1137.59	326.651	810.943	-0.0704878	0.802878	-0.812473	0.000232573	0.882961	1.29844e-05	0.679306	0.00534726	0.943544	1.31931e-07	-0.19964	0.475627	0.0948041	0.736811
Rcc1	blue	0.909068	-0.180067	0.662921	-0.0176384	1289.19	972.075	317.11	654.965	-0.0830775	0.768488	-0.799762	0.00034471	0.88284	1.30681e-05	0.662921	0.00706881	0.909068	2.68601e-06	-0.180067	0.520758	-0.0176384	0.950252
Neurl1a	blue	0.826303	-0.0271688	0.782944	0.220996	1182.57	672.073	510.492	161.581	-0.228427	0.412871	-0.654177	0.00815093	0.882603	1.32329e-05	0.782944	0.000557396	0.826303	0.000146458	-0.0271688	0.923431	0.220996	0.42864
Fkbp10	blue	0.951731	-0.220588	0.668011	0.0604978	1485.51	1173.78	311.726	862.053	-0.0515215	0.855308	-0.830479	0.000126373	0.882	1.36604e-05	0.668011	0.00649308	0.951731	4.86094e-08	-0.220588	0.429516	0.0604978	0.830411
Pde6d	blue	0.940522	-0.193235	0.690902	0.0716263	1450.78	1113.51	337.272	776.241	-0.072434	0.797538	-0.809554	0.000255217	0.881987	1.36695e-05	0.690902	0.00434358	0.940522	1.83793e-07	-0.193235	0.490183	0.0716263	0.799753
Rnaseh2b	blue	0.943082	-0.205184	0.681404	0.160489	1445.01	1120.02	324.985	795.039	-0.0603504	0.830819	-0.821631	0.000171965	0.881981	1.36739e-05	0.681404	0.0051533	0.943082	1.38941e-07	-0.205184	0.463197	0.160489	0.567746
A930007A09Rik	blue	0.845543	-0.0741684	0.716485	0.234041	1071.91	709.576	362.333	347.243	-0.17084	0.542682	-0.710949	0.00296518	0.881789	1.38126e-05	0.716485	0.00265409	0.845543	7.17126e-05	-0.0741684	0.792787	0.234041	0.401158
Cd48	blue	0.845027	-0.0270176	0.759183	0.152077	1239.24	780.206	459.033	321.172	-0.21011	0.452287	-0.67163	0.00610676	0.88174	1.38483e-05	0.759183	0.00102893	0.845027	7.31896e-05	-0.0270176	0.923856	0.152077	0.588467
Limk1	blue	0.909974	-0.147343	0.686883	0.0348114	1355.35	1004.03	351.321	652.708	-0.107986	0.70167	-0.773647	0.000714525	0.881632	1.39267e-05	0.686883	0.00467285	0.909974	2.52253e-06	-0.147343	0.600261	0.0348114	0.901978
Ssbp4	blue	0.915504	-0.156773	0.688379	0.168585	1347.47	1009.27	338.195	671.079	-0.106317	0.70609	-0.775195	0.000686114	0.881512	1.40149e-05	0.688379	0.00454809	0.915504	1.69354e-06	-0.156773	0.576862	0.168585	0.548101
Sestd1	blue	0.927227	-0.17304	0.686554	0.123518	1397.05	1060.17	336.881	723.29	-0.0869555	0.757973	-0.793979	0.000408631	0.880934	1.44443e-05	0.686554	0.00470065	0.927227	6.60243e-07	-0.17304	0.537418	0.123518	0.660975
Marveld3	blue	0.771732	0.0143461	0.747484	-0.0117307	904.941	492.34	412.601	79.7388	-0.256166	0.356755	-0.624753	0.0127733	0.880919	1.44557e-05	0.747484	0.00135797	0.771732	0.000750973	0.0143461	0.959529	-0.0117307	0.966903
Arhgap12	blue	0.909809	-0.159632	0.693256	0.0699054	1291.57	953.109	338.456	614.653	-0.0928982	0.741935	-0.787788	0.000487444	0.880686	1.46318e-05	0.693256	0.00415947	0.909809	2.55154e-06	-0.159632	0.569844	0.0699054	0.804478
Tnfrsf21	blue	0.833076	-0.0223761	0.743599	0.144626	1127.05	708.798	418.249	290.55	-0.208214	0.456471	-0.672445	0.00602225	0.880659	1.46522e-05	0.743599	0.0014843	0.833076	0.000115065	-0.0223761	0.936911	0.144626	0.607071
Dph2	blue	0.940112	-0.21309	0.667658	0.0700898	1428.74	1113.25	315.489	797.758	-0.0520114	0.853945	-0.82863	0.000134966	0.880641	1.46661e-05	0.667658	0.00653184	0.940112	1.91987e-07	-0.21309	0.445751	0.0700898	0.803971
Slc25a24	blue	0.954524	-0.217658	0.675267	0.13106	1516.75	1194.37	322.387	871.979	-0.0487954	0.862895	-0.831404	0.000122244	0.880199	1.50059e-05	0.675267	0.00573702	0.954524	3.32225e-08	-0.217658	0.435824	0.13106	0.641521
Rftn1	blue	0.852299	-0.0377269	0.749166	0.218286	1241.78	801.34	440.443	360.897	-0.20213	0.470024	-0.677875	0.00548291	0.880004	1.5158e-05	0.749166	0.00130603	0.852299	5.45479e-05	-0.0377269	0.893809	0.218286	0.434466
Pdgfb	blue	0.830345	-0.0100802	0.775891	0.189882	1190.02	707.82	482.196	225.625	-0.235299	0.39856	-0.644436	0.00950489	0.879735	1.53705e-05	0.775891	0.000673652	0.830345	0.000126978	-0.0100802	0.971558	0.189882	0.497886
Lepre1	blue	0.937716	-0.207724	0.682965	0.0798547	1403.42	1080.06	323.366	756.692	-0.0680895	0.809469	-0.811551	0.000239544	0.87964	1.54455e-05	0.682965	0.00501259	0.937716	2.46307e-07	-0.207724	0.457554	0.0798547	0.777256
4930515G01Rik	blue	0.758279	0.0841666	0.819309	0.215773	1086.5	508.529	577.975	-69.4465	-0.311485	0.258425	-0.56783	0.0272374	0.879315	1.57061e-05	0.819309	0.000185938	0.758279	0.00105179	0.0841666	0.765531	0.215773	0.439905
Bub1b	blue	0.867536	-0.0853739	0.705814	0.104745	1204.36	833.347	371.015	462.331	-0.163182	0.561179	-0.71591	0.00268513	0.879092	1.58866e-05	0.705814	0.00327917	0.867536	2.79327e-05	-0.0853739	0.762257	0.104745	0.710262
Praf2	blue	0.883823	-0.11509	0.717741	0.204623	1222.26	853.396	368.869	484.527	-0.142655	0.612032	-0.736038	0.00175733	0.878693	1.62141e-05	0.717741	0.00258727	0.883823	1.24021e-05	-0.11509	0.682955	0.204623	0.464446
Cryab	blue	0.957632	-0.225472	0.673653	0.0864699	1518.53	1202.98	315.558	887.42	-0.0456462	0.871674	-0.832954	0.00011558	0.8786	1.62918e-05	0.673653	0.00589881	0.957632	2.11262e-08	-0.225472	0.419104	0.0864699	0.759287
Unc5b	blue	0.950789	-0.221943	0.671634	0.0439367	1462.25	1154.8	307.449	847.348	-0.0513059	0.855907	-0.827007	0.0001429	0.878313	1.6532e-05	0.671634	0.00610633	0.950789	5.4988e-08	-0.221943	0.426614	0.0439367	0.876445
Esam	blue	0.8247	0.0072445	0.767139	0.128764	1196.05	719.574	476.48	243.094	-0.236836	0.395395	-0.641438	0.00995513	0.878274	1.65648e-05	0.767139	0.00084455	0.8247	0.000154831	0.0072445	0.979557	0.128764	0.64742
Zfp184	blue	0.932662	-0.208812	0.669045	-0.0194124	1360.45	1052.08	308.367	743.713	-0.059571	0.832975	-0.818328	0.000192115	0.877899	1.68835e-05	0.669045	0.00638077	0.932662	4.03976e-07	-0.208812	0.455149	-0.0194124	0.945255
9430020K01Rik	blue	0.872199	-0.090367	0.701779	0.0631712	1222.65	848.243	374.406	473.838	-0.148115	0.598332	-0.729523	0.00202373	0.877638	1.71082e-05	0.701779	0.00354403	0.872199	2.23892e-05	-0.090367	0.748754	0.0631712	0.823024
Lair1	blue	0.725287	0.134538	0.820576	0.248489	1027.28	462.667	564.611	-101.944	-0.365433	0.180434	-0.512125	0.0509744	0.877558	1.71774e-05	0.820576	0.000178204	0.725287	0.00221367	0.134538	0.632621	0.248489	0.371843
Rbmx2	blue	0.955566	-0.22596	0.662753	0.0837743	1511.1	1202.41	308.691	893.72	-0.0378353	0.893506	-0.839577	9.03669e-05	0.877412	1.73046e-05	0.662753	0.00708854	0.955566	2.86463e-08	-0.22596	0.418071	0.0837743	0.766596
Pomc	blue	0.769189	0.0407382	0.737352	0.186261	941.396	527.108	414.288	112.82	-0.26884	0.332605	-0.608291	0.0161245	0.877131	1.75514e-05	0.737352	0.00170719	0.769189	0.000801677	0.0407382	0.885383	0.186261	0.506269
Oip5	blue	0.702186	0.172213	0.824664	0.109604	1026.75	436.768	589.98	-153.211	-0.393283	0.146989	-0.483512	0.067852	0.876795	1.78505e-05	0.824664	0.000155024	0.702186	0.00351654	0.172213	0.539394	0.109604	0.697392
Acvrl1	blue	0.848432	-0.0294078	0.764594	0.231767	1237.72	777.836	459.881	317.955	-0.205803	0.461819	-0.670925	0.00618055	0.876728	1.79114e-05	0.764594	0.000900349	0.848432	6.38973e-05	-0.0294078	0.917141	0.231767	0.405881
Hs1bp3	blue	0.879949	-0.141319	0.689438	0.192643	1120.04	806.09	313.946	492.145	-0.122691	0.66312	-0.754004	0.00116554	0.876695	1.79408e-05	0.689438	0.00446136	0.879949	1.52014e-05	-0.141319	0.615401	0.192643	0.491539
Acot1	blue	-0.743592	-0.070374	-0.772251	-0.0878951	896.574	454.235	442.339	11.8964	0.318975	0.246539	0.557637	0.030781	-0.876611	1.80162e-05	-0.772251	0.000740947	-0.743592	0.00148455	-0.070374	0.803191	-0.0878951	0.75543
2010001M09Rik	blue	0.844937	-0.0431298	0.75168	0.235916	1178.25	746.449	431.798	314.65	-0.197597	0.480247	-0.678915	0.00538408	0.876512	1.81064e-05	0.75168	0.00123144	0.844937	7.34484e-05	-0.0431298	0.878699	0.235916	0.397288
Prx	blue	0.934952	-0.204019	0.672465	0.0894883	1383.5	1075.06	308.439	766.625	-0.0580899	0.837076	-0.818324	0.000192139	0.876414	1.81956e-05	0.672465	0.00602026	0.934952	3.2444e-07	-0.204019	0.465795	0.0894883	0.751126
Zcchc3	blue	0.857501	-0.081993	0.729647	0.00687756	1156.12	771.126	384.992	386.133	-0.160233	0.568374	-0.716109	0.00267433	0.876342	1.8261e-05	0.729647	0.00201836	0.857501	4.37806e-05	-0.081993	0.771436	0.00687756	0.980593
Gpr114	blue	0.929531	-0.196529	0.671624	0.0419607	1342.6	1038.75	303.843	734.91	-0.0768064	0.785573	-0.799356	0.00034892	0.876162	1.84264e-05	0.671624	0.00610742	0.929531	5.38656e-07	-0.196529	0.482671	0.0419607	0.881965
Tmem22	blue	0.701548	0.171247	0.821229	0.129185	1024.42	440.155	584.268	-144.113	-0.38762	0.153424	-0.487912	0.065025	0.875532	1.90143e-05	0.821229	0.00017432	0.701548	0.00355966	0.171247	0.541707	0.129185	0.646338
Als2cr4	blue	0.888674	-0.113592	0.725529	0.141676	1263.92	880.826	383.095	497.731	-0.144625	0.607074	-0.730723	0.00197238	0.875348	1.91889e-05	0.725529	0.00220246	0.888674	9.51355e-06	-0.113592	0.686888	0.141676	0.6145
Phtf1	blue	0.953115	-0.224397	0.671471	0.0875137	1472.76	1165.5	307.258	858.24	-0.0435845	0.877429	-0.831735	0.000120795	0.87532	1.92159e-05	0.671471	0.0061233	0.953115	4.037e-08	-0.224397	0.421385	0.0875137	0.756462
Tctn3	blue	0.902727	-0.175318	0.681886	0.0733976	1211.69	904.361	307.333	597.028	-0.0868678	0.75821	-0.788083	0.000483427	0.874951	1.95703e-05	0.681886	0.00510952	0.902727	4.09817e-06	-0.175318	0.531992	0.0733976	0.794898
Inpp5d	blue	0.949395	-0.208803	0.677576	0.115754	1492	1169.71	322.296	847.411	-0.05189	0.854283	-0.823031	0.000163966	0.874921	1.9599e-05	0.677576	0.00551154	0.949395	6.57174e-08	-0.208803	0.455169	0.115754	0.681214
Clip2	blue	0.918727	-0.173952	0.678917	0.0594689	1337.65	1015.7	321.955	693.744	-0.0817323	0.772145	-0.793057	0.00041966	0.874789	1.97275e-05	0.678917	0.00538392	0.918727	1.3257e-06	-0.173952	0.535243	0.0594689	0.833257
Dynll1	blue	0.917095	-0.179948	0.682352	0.0299078	1328.53	1002.26	326.264	676	-0.073881	0.793574	-0.800822	0.000333937	0.874703	1.98113e-05	0.682352	0.00506748	0.917095	1.50253e-06	-0.179948	0.521038	0.0299078	0.915736
D630004K10Rik	blue	-0.89827	0.149658	-0.683797	-0.129443	1239.21	917.27	321.936	595.334	0.110694	0.694516	0.763954	0.00091485	-0.874648	1.98652e-05	-0.683797	0.00493891	-0.89827	5.42328e-06	0.149658	0.594482	-0.129443	0.645673
Cdh5	blue	0.795844	0.0453075	0.783597	0.163169	1129.85	631.108	498.746	132.362	-0.268158	0.333879	-0.6064	0.0165491	0.874558	1.99534e-05	0.783597	0.000547517	0.795844	0.000387044	0.0453075	0.872619	0.163169	0.561212
1500011B03Rik	blue	0.947628	-0.232316	0.644249	0.0542609	1427.37	1144.81	282.557	862.251	-0.0332901	0.906244	-0.841088	8.53019e-05	0.874378	2.01314e-05	0.644249	0.00953246	0.947628	8.17853e-08	-0.232316	0.404739	0.0542609	0.847695
Ttc39a	blue	0.887129	-0.132563	0.708305	0.137754	1206.34	857.412	348.932	508.479	-0.120329	0.669263	-0.754005	0.0011655	0.874334	2.01745e-05	0.708305	0.00312372	0.887129	1.03655e-05	-0.132563	0.637667	0.137754	0.624432
Dck	blue	0.884561	-0.111849	0.716415	0.158259	1223.81	858.77	365.04	493.73	-0.14553	0.604802	-0.728723	0.00205854	0.874253	2.02552e-05	0.716415	0.00265786	0.884561	1.19206e-05	-0.111849	0.691473	0.158259	0.573211
Aurka	blue	0.917446	-0.183021	0.665537	0.0608449	1318.66	1008.13	310.525	697.606	-0.0732275	0.795364	-0.801008	0.000332078	0.874235	2.02732e-05	0.665537	0.00676816	0.917446	1.46299e-06	-0.183021	0.513826	0.0608449	0.829451
Lrrc8e	blue	0.802155	-0.0217374	0.722045	-0.173658	927.729	573.465	354.264	219.201	-0.230994	0.407493	-0.643172	0.00969269	0.874166	2.03423e-05	0.722045	0.00236845	0.802155	0.000320777	-0.0217374	0.938709	-0.173658	0.535945
Wdr31	blue	0.729738	0.106732	0.803996	0.133644	950.471	442.659	507.812	-65.1536	-0.335378	0.221703	-0.538774	0.0382403	0.874152	2.03561e-05	0.803996	0.000303305	0.729738	0.00201446	0.106732	0.70499	0.133644	0.634904
Chat	blue	0.778088	-0.000992202	0.746501	-0.0991282	900.751	501.588	399.163	102.425	-0.251041	0.36679	-0.623041	0.0130941	0.874082	2.04266e-05	0.746501	0.0013891	0.778088	0.000635504	-0.000992202	0.9972	-0.0991282	0.725226
Ccr2	blue	0.922586	-0.209522	0.66762	0.0543824	1274.38	986.031	288.344	697.687	-0.0607471	0.829721	-0.81323	0.000226985	0.873977	2.05323e-05	0.66762	0.00653602	0.922586	9.75567e-07	-0.209522	0.453583	0.0543824	0.847358
Bmp8b	blue	0.789847	-0.0155119	0.728849	-0.031867	893.125	529.141	363.984	165.157	-0.241475	0.385926	-0.632298	0.011431	0.873774	2.07379e-05	0.728849	0.00205305	0.789847	0.000459969	-0.0155119	0.956244	-0.031867	0.910236
C330006K01Rik	blue	0.959856	-0.236753	0.65925	0.0862913	1501.96	1206.62	295.333	911.29	-0.0301362	0.915095	-0.843346	7.81726e-05	0.873482	2.10359e-05	0.65925	0.00750841	0.959856	1.49603e-08	-0.236753	0.395565	0.0862913	0.759771
Uggt2	blue	0.707025	0.0886428	0.749765	0.251271	763.769	371.299	392.47	-21.1714	-0.335399	0.221673	-0.537679	0.0387111	0.873078	2.14548e-05	0.749765	0.00128796	0.707025	0.00320282	0.0886428	0.753409	0.251271	0.366336
Hspb1	blue	0.784549	0.00647158	0.729956	0.124366	949.712	556.23	393.483	162.747	-0.230797	0.407904	-0.642256	0.00983066	0.873053	2.14809e-05	0.729956	0.00200508	0.784549	0.000533369	0.00647158	0.981738	0.124366	0.658777
Ctdsp2	blue	0.951047	-0.218643	0.672596	0.13059	1468.57	1159.3	309.268	850.029	-0.0432593	0.878337	-0.829777	0.00012958	0.873036	2.14982e-05	0.672596	0.0060067	0.951047	5.31756e-08	-0.218643	0.433696	0.13059	0.642727
Pfkfb2	blue	0.897348	-0.187223	0.652332	0.0221693	1174.08	888.39	285.693	602.697	-0.0762247	0.787162	-0.796334	0.000381527	0.872558	2.20031e-05	0.652332	0.008395	0.897348	5.73775e-06	-0.187223	0.504035	0.0221693	0.937493
Zbtb32	blue	0.952777	-0.231155	0.655188	0.10956	1457.85	1167.28	290.578	876.698	-0.0385681	0.891454	-0.833719	0.000112402	0.872287	2.22949e-05	0.655188	0.00801959	0.952777	4.2262e-08	-0.231155	0.407156	0.10956	0.697509
Scand3	blue	0.911525	-0.17951	0.679842	0.130444	1242.77	938.295	304.472	633.824	-0.0870915	0.757604	-0.784885	0.000528445	0.871976	2.26315e-05	0.679842	0.00529721	0.911525	2.2617e-06	-0.17951	0.522069	0.130444	0.643101
Stk39	blue	0.873032	-0.0895704	0.730675	0.0687027	1216.41	825.717	390.691	435.026	-0.165295	0.556049	-0.706431	0.00324006	0.871727	2.29056e-05	0.730675	0.00197443	0.873032	2.15024e-05	-0.0895704	0.750904	0.0687027	0.807783
Evi2a	blue	0.841731	-0.0513721	0.725145	0.145922	1134.92	746.47	388.452	358.018	-0.186439	0.505855	-0.685237	0.00481328	0.871677	2.29607e-05	0.725145	0.00222028	0.841731	8.32188e-05	-0.0513721	0.855723	0.145922	0.60382
Zfp81	blue	0.888414	-0.123697	0.734382	0.135912	1277.2	872.408	404.788	467.62	-0.135234	0.630845	-0.736378	0.00174424	0.871612	2.30321e-05	0.734382	0.0018222	0.888414	9.65251e-06	-0.123697	0.660511	0.135912	0.629117
Bhlha15	blue	0.840899	-0.105318	0.684854	0.0200307	999.023	683.993	315.03	368.962	-0.161222	0.565957	-0.710269	0.00300534	0.871491	2.31672e-05	0.684854	0.00484645	0.840899	8.59203e-05	-0.105318	0.708739	0.0200307	0.943514
Meox1	blue	0.891189	-0.155879	0.681051	-0.00826601	1180.1	865.737	314.363	551.374	-0.112708	0.689212	-0.758716	0.0010407	0.871424	2.32418e-05	0.681051	0.00518554	0.891189	8.2521e-06	-0.155879	0.579065	-0.00826601	0.976676
Cxcr3	blue	0.923666	-0.169575	0.697517	0.115471	1391.29	1042.15	349.141	693.007	-0.0833021	0.767878	-0.787644	0.000489416	0.870946	2.37805e-05	0.697517	0.00384202	0.923666	8.92779e-07	-0.169575	0.54572	0.115471	0.681957
Smc4	blue	0.941064	-0.201358	0.671523	0.0791965	1422.32	1113	309.315	803.687	-0.0582196	0.836716	-0.812114	0.000235264	0.870334	2.44853e-05	0.671523	0.00611791	0.941064	1.734e-07	-0.201358	0.471757	0.0791965	0.77905
1700017B05Rik	blue	0.779049	0.00283568	0.715164	-0.0841044	944.645	554.183	390.462	163.721	-0.232456	0.404447	-0.63781	0.010522	0.870266	2.45643e-05	0.715164	0.00272583	0.779049	0.000619386	0.00283568	0.991998	-0.0841044	0.7657
Cyp7b1	blue	-0.811228	0.0687557	-0.722121	-0.00340661	914.688	566.441	348.247	218.194	0.202439	0.46933	0.667803	0.00651594	-0.870242	2.45929e-05	-0.722121	0.00236474	-0.811228	0.000242019	0.0687557	0.807637	-0.00340661	0.990386
Dus2l	blue	0.925735	-0.219371	0.642673	0.0532443	1284.79	1012	272.791	739.207	-0.0517894	0.854563	-0.818116	0.00019347	0.869905	2.49896e-05	0.642673	0.00976772	0.925735	7.5054e-07	-0.219371	0.43213	0.0532443	0.850519
Ccng2	blue	0.747894	0.0763434	0.744621	-0.00304844	935.482	499.024	436.458	62.5665	-0.293118	0.289022	-0.576652	0.0244277	0.86977	2.51502e-05	0.744621	0.00145021	0.747894	0.00134517	0.0763434	0.786838	-0.00304844	0.991397
Ifi30	blue	0.720528	0.146532	0.802222	0.136768	1026.42	478.912	547.512	-68.6007	-0.350153	0.200734	-0.519121	0.0473666	0.869275	2.57465e-05	0.802222	0.000320125	0.720528	0.00244383	0.146532	0.602291	0.136768	0.626937
Camk2n2	blue	0.953207	-0.235749	0.657647	0.100795	1447.33	1161.24	286.082	875.161	-0.0293559	0.917286	-0.839875	8.93459e-05	0.869231	2.57994e-05	0.657647	0.0077069	0.953207	3.98682e-08	-0.235749	0.397631	0.100795	0.720777
Myo1f	blue	0.942533	-0.21604	0.657112	0.0927914	1422.13	1128.27	293.868	834.397	-0.0437297	0.877023	-0.825381	0.000151229	0.86911	2.5947e-05	0.657112	0.00777419	0.942533	1.47691e-07	-0.21604	0.439326	0.0927914	0.742222
Zfp72	blue	0.883293	-0.124449	0.733401	0.121332	1240.16	839.846	400.313	439.533	-0.133212	0.636008	-0.735416	0.00178149	0.868628	2.6543e-05	0.733401	0.00186153	0.883293	1.27574e-05	-0.124449	0.658562	0.121332	0.666651
Gpx2	blue	0.806333	-0.0183569	0.769386	0.128323	1052.16	591.947	460.214	131.733	-0.23175	0.405916	-0.636797	0.0106847	0.868547	2.66437e-05	0.769386	0.000797645	0.806333	0.000282256	-0.0183569	0.948228	0.128323	0.648556
Atp1a4	blue	0.9147	-0.202123	0.659189	0.163403	1231.19	953.636	277.556	676.08	-0.063	0.823496	-0.805472	0.00028987	0.868472	2.67383e-05	0.659189	0.00751583	0.9147	1.79756e-06	-0.202123	0.470038	0.163403	0.560643
Lsm3	blue	0.943129	-0.239541	0.637118	0.0679716	1369.91	1104	265.912	838.086	-0.0293589	0.917278	-0.838904	9.26997e-05	0.868263	2.70012e-05	0.637118	0.010633	0.943129	1.38214e-07	-0.239541	0.389858	0.0679716	0.809794
Kif2a	blue	0.94873	-0.229052	0.656574	0.103804	1440.67	1146.56	294.11	852.453	-0.0287317	0.91904	-0.839467	9.07448e-05	0.868198	2.70828e-05	0.656574	0.00784217	0.94873	7.14203e-08	-0.229052	0.411557	0.103804	0.712761
4930455F23Rik	blue	0.961563	-0.256467	0.64609	0.0411925	1474.31	1200.8	273.505	927.297	-0.0143985	0.959382	-0.853776	5.12891e-05	0.868175	2.71125e-05	0.64609	0.00926339	0.961563	1.13273e-08	-0.256467	0.356171	0.0411925	0.884113
Trim35	blue	0.839876	-0.0512046	0.727099	0.196436	1099.29	716.194	383.1	333.094	-0.181526	0.517328	-0.686449	0.00470956	0.867975	2.73665e-05	0.727099	0.00213072	0.839876	8.93445e-05	-0.0512046	0.856189	0.196436	0.482881
Stk17b	blue	0.89699	-0.137024	0.681955	0.0846236	1268.29	933.074	335.212	597.862	-0.104461	0.711016	-0.763448	0.000926438	0.867908	2.74522e-05	0.681955	0.00510333	0.89699	5.86367e-06	-0.137024	0.626288	0.0846236	0.764291
Cks1b	blue	0.807273	-0.0647959	0.692799	-0.0167629	881.854	570.134	311.72	258.414	-0.208364	0.45614	-0.659392	0.00749105	0.867755	2.7649e-05	0.692799	0.0041947	0.807273	0.000274131	-0.0647959	0.818541	-0.0167629	0.952718
Ppap2b	blue	-0.89092	0.193432	-0.640685	0.0568477	1123.66	853.497	270.167	583.33	0.071033	0.801381	0.796498	0.00037969	-0.867531	2.79392e-05	-0.640685	0.0100707	-0.89092	8.37982e-06	0.193432	0.489732	0.0568477	0.840518
Klf16	blue	0.942744	-0.222828	0.664119	0.0642188	1406.15	1108.79	297.356	811.438	-0.034445	0.903005	-0.832865	0.000115954	0.86731	2.82288e-05	0.664119	0.00692983	0.942744	1.44285e-07	-0.222828	0.424725	0.0642188	0.820133
Lrrk2	blue	0.857942	-0.0625844	0.720619	0.0832229	1181.68	799.188	382.491	416.697	-0.173238	0.536945	-0.694045	0.00409916	0.867283	2.82631e-05	0.720619	0.00243924	0.857942	4.29542e-05	-0.0625844	0.824644	0.0832229	0.768094
Pea15a	blue	0.952353	-0.225959	0.662641	0.0942895	1458.31	1164.59	293.728	870.858	-0.0397109	0.888256	-0.826693	0.000144476	0.866404	2.94375e-05	0.662641	0.00710159	0.952353	4.47463e-08	-0.225959	0.418074	0.0942895	0.738194
Rab11fip4	blue	0.783338	-0.00267152	0.743439	0.245252	883.189	508.644	374.545	134.099	-0.238085	0.392834	-0.628068	0.0121693	0.866153	2.97804e-05	0.743439	0.0014897	0.783338	0.000551411	-0.00267152	0.992461	0.245252	0.378307
Lin9	blue	0.71794	0.105669	0.778987	-0.0242785	839.675	394.876	444.8	-49.9242	-0.346077	0.206387	-0.519988	0.0469334	0.866065	2.99012e-05	0.778987	0.000620406	0.71794	0.00257679	0.105669	0.707808	-0.0242785	0.931558
Ntf5	blue	0.8093	-0.0186765	0.72477	0.0398955	979.608	602.362	377.245	225.117	-0.213174	0.445566	-0.652665	0.00835052	0.865839	3.02131e-05	0.72477	0.00223778	0.8093	0.000257268	-0.0186765	0.947327	0.0398955	0.88774
Acsbg1	blue	0.71453	0.107168	0.796685	0.295965	881.82	397.508	484.312	-86.8032	-0.351982	0.198231	-0.513783	0.0501017	0.865765	3.03167e-05	0.796685	0.000377612	0.71453	0.00276082	0.107168	0.703836	0.295965	0.284145
Trip13	blue	0.944034	-0.227963	0.639885	0.0256053	1398.73	1124.51	274.22	850.287	-0.0360235	0.898581	-0.829499	0.00013087	0.865522	3.06558e-05	0.639885	0.0101947	0.944034	1.24804e-07	-0.227963	0.413846	0.0256053	0.927827
Arfgap3	blue	0.938209	-0.235805	0.63386	-0.0163846	1343.54	1079.85	263.695	816.152	-0.0362484	0.89795	-0.829198	0.000132274	0.865447	3.07619e-05	0.63386	0.0111675	0.938209	2.34185e-07	-0.235805	0.397516	-0.0163846	0.953784
Brsk1	blue	0.843707	-0.0485481	0.747254	0.176949	1131.73	719.652	412.079	307.573	-0.187399	0.503629	-0.677673	0.00550227	0.865071	3.12945e-05	0.747254	0.0013652	0.843707	7.708e-05	-0.0485481	0.863584	0.176949	0.528122
Cyb5r1	blue	0.953864	-0.252551	0.629533	0.0372005	1424.47	1165.58	258.888	906.689	-0.0160228	0.954804	-0.848989	6.24737e-05	0.865012	3.1379e-05	0.629533	0.0119095	0.953864	3.64241e-08	-0.252551	0.363818	0.0372005	0.895283
Slc39a13	blue	0.952715	-0.254474	0.640979	0.0580229	1409.45	1145.47	263.979	881.496	-0.0183697	0.948191	-0.846261	6.9702e-05	0.86463	3.19297e-05	0.640979	0.0100255	0.952715	4.26192e-08	-0.254474	0.36005	0.0580229	0.837261
Slc38a1	blue	0.758222	0.0406828	0.785206	0.256148	947.543	475.723	471.82	3.90263	-0.272177	0.326404	-0.592331	0.019984	0.864508	3.21081e-05	0.785206	0.000523776	0.758222	0.00105325	0.0406828	0.885538	0.256148	0.356791
6720463M24Rik	blue	0.899869	-0.170544	0.679071	-0.0878401	1193.84	891.316	302.528	588.788	-0.0907951	0.747599	-0.773325	0.000720537	0.864121	3.26776e-05	0.679071	0.00536938	0.899869	4.91204e-06	-0.170544	0.543393	-0.0878401	0.755579
Ccdc89	blue	0.898554	-0.163389	0.684581	0.132162	1181.42	877.382	304.043	573.339	-0.102051	0.717427	-0.761953	0.000961379	0.864004	3.28507e-05	0.684581	0.00487017	0.898554	5.32928e-06	-0.163389	0.560677	0.132162	0.638696
Cerk	blue	0.959665	-0.240148	0.66571	0.144021	1492.42	1195.91	296.51	899.398	-0.0250534	0.929379	-0.838921	9.26407e-05	0.863974	3.28951e-05	0.66571	0.0067486	0.959665	1.54227e-08	-0.240148	0.388621	0.144021	0.608592
Timd4	blue	-0.715047	-0.0167304	-0.711485	0.0781863	661.473	346.076	315.397	30.6783	0.279279	0.31343	0.584666	0.0220713	-0.863946	3.29374e-05	-0.711485	0.00293384	-0.715047	0.00273224	-0.0167304	0.95281	0.0781863	0.781805
Ap1s2	blue	0.924574	-0.178228	0.677588	0.0996247	1367.56	1048.31	319.249	729.058	-0.0738538	0.793648	-0.790033	0.000457542	0.863887	3.30248e-05	0.677588	0.0055104	0.924574	8.2782e-07	-0.178228	0.525095	0.0996247	0.7239
Mtmr11	blue	0.929824	-0.207002	0.657987	-0.0298461	1328.14	1041.87	286.27	755.604	-0.0553036	0.844801	-0.808504	0.000263781	0.863808	3.31431e-05	0.657987	0.00766457	0.929824	5.24646e-07	-0.207002	0.459156	-0.0298461	0.915909
Sfxn3	blue	0.959087	-0.241384	0.656119	0.114319	1474.88	1191.54	283.346	908.193	-0.0282499	0.920393	-0.835368	0.000105792	0.863618	3.34286e-05	0.656119	0.00790003	0.959087	1.6894e-08	-0.241384	0.38611	0.114319	0.684977
Flnc	blue	0.711375	0.0919363	0.795784	0.137182	864.457	379.528	484.93	-105.402	-0.338386	0.217328	-0.524632	0.0446605	0.863018	3.43452e-05	0.795784	0.00038772	0.711375	0.00294026	0.0919363	0.744524	0.137182	0.625884
Me2	blue	0.9505	-0.228576	0.664881	0.208646	1433.94	1142.73	291.211	851.516	-0.0336059	0.905358	-0.829335	0.000131634	0.862941	3.44639e-05	0.664881	0.00684254	0.9505	5.70825e-08	-0.228576	0.412556	0.208646	0.455515
Zfp51	blue	0.936852	-0.214467	0.648442	0.0839279	1378.13	1091.47	286.666	804.801	-0.0392397	0.889575	-0.823436	0.000161711	0.862676	3.48763e-05	0.648442	0.00892824	0.936852	2.68826e-07	-0.214467	0.442746	0.0839279	0.766179
Polk	blue	0.940385	-0.227649	0.653349	0.0822647	1358.76	1081.08	277.675	803.409	-0.0305763	0.913859	-0.831958	0.000119828	0.862534	3.50983e-05	0.653349	0.00825973	0.940385	1.86499e-07	-0.227649	0.414507	0.0822647	0.770697
Pnldc1	blue	-0.763563	-0.03514	-0.729214	0.0903807	879.298	497.366	381.932	115.434	0.266964	0.336119	0.595275	0.0192236	-0.862239	3.55635e-05	-0.729214	0.00203711	-0.763563	0.0009238	-0.03514	0.901057	0.0903807	0.748717
Eid2	blue	0.850749	-0.105635	0.682025	0.116775	1028.21	720.35	307.858	412.492	-0.14534	0.60528	-0.716718	0.00264159	0.862058	3.58531e-05	0.682025	0.00509696	0.850749	5.81497e-05	-0.105635	0.707897	0.116775	0.678542
Kif20b	blue	0.926824	-0.193432	0.66149	0.072764	1337.27	1042.88	294.394	748.486	-0.0604084	0.830658	-0.801108	0.000331083	0.861516	3.67282e-05	0.66149	0.00723772	0.926824	6.83657e-07	-0.193432	0.489733	0.072764	0.796634
Gpc1	blue	0.915297	-0.188055	0.661961	0.059755	1290.61	992.348	298.261	694.087	-0.0590202	0.834499	-0.802061	0.00032169	0.861081	3.74425e-05	0.661961	0.00718182	0.915297	1.71978e-06	-0.188055	0.502109	0.059755	0.832466
Apol7c	blue	-0.771771	0.00323142	-0.707724	0.0213719	868.602	505.925	362.677	143.248	0.22166	0.427218	0.639328	0.0102818	-0.860988	3.75973e-05	-0.707724	0.00315943	-0.771771	0.000750213	0.00323142	0.990881	0.0213719	0.939737
2310004N24Rik	blue	0.925216	-0.217534	0.629418	0.0675242	1288.28	1025.64	262.64	763.004	-0.0405573	0.885889	-0.819808	0.000182858	0.860365	3.86451e-05	0.629418	0.0119298	0.925216	7.84298e-07	-0.217534	0.436091	0.0675242	0.811025
Olfr128	blue	-0.730637	-0.0346254	-0.685958	0.0836777	789.25	431.645	357.604	74.0407	0.261136	0.347172	0.59839	0.0184436	-0.859526	4.00952e-05	-0.685958	0.00475139	-0.730637	0.001976	-0.0346254	0.902499	0.0836777	0.766858
Cbr3	blue	0.928656	-0.214538	0.646311	0.0604412	1289.13	1021.9	267.237	754.66	-0.0510925	0.856501	-0.808393	0.0002647	0.859486	4.01657e-05	0.646311	0.00923153	0.928656	5.82393e-07	-0.214538	0.442592	0.0604412	0.830567
Gipc2	blue	0.714116	0.0850084	0.770838	-0.118179	797.875	378.638	419.238	-40.5998	-0.334409	0.223126	-0.525071	0.04445	0.859479	4.01771e-05	0.770838	0.000768478	0.714116	0.00278387	0.0850084	0.763248	-0.118179	0.674872
2610002J02Rik	blue	0.948178	-0.252032	0.628693	0.0769924	1386.74	1130.17	256.568	873.605	-0.00961645	0.972866	-0.849855	6.03143e-05	0.859472	4.01909e-05	0.628693	0.012058	0.948178	7.64686e-08	-0.252032	0.364837	0.0769924	0.785064
Anxa9	blue	0.923325	-0.180518	0.682608	0.13321	1331.15	1017.64	313.513	704.124	-0.0784334	0.781131	-0.780757	0.000591543	0.85919	4.06878e-05	0.682608	0.00504448	0.923325	9.18268e-07	-0.180518	0.519698	0.13321	0.636013
Cotl1	blue	0.932386	-0.217487	0.641771	0.0770045	1339.79	1066.76	273.031	793.727	-0.0427509	0.879757	-0.816425	0.000204575	0.859176	4.07136e-05	0.641771	0.00990422	0.932386	4.14606e-07	-0.217487	0.436192	0.0770045	0.785031
Lass5	blue	0.951513	-0.229033	0.651153	0.0720801	1445.71	1164.56	281.154	883.402	-0.0300769	0.915261	-0.828914	0.000133613	0.858991	4.10424e-05	0.651153	0.00855386	0.951513	5.00294e-08	-0.229033	0.411597	0.0720801	0.798509
Crebbp	blue	0.960611	-0.260677	0.647384	0.121897	1452.1	1184.29	267.811	916.475	-0.00737771	0.979182	-0.851511	5.63552e-05	0.858889	4.12261e-05	0.647384	0.00907786	0.960611	1.32491e-08	-0.260677	0.34805	0.121897	0.665183
Akr1b3	blue	0.952123	-0.238252	0.642141	0.0570722	1431.93	1161.39	270.538	890.856	-0.0232443	0.934468	-0.835273	0.000106165	0.858517	4.18973e-05	0.642141	0.00984801	0.952123	4.61443e-08	-0.238252	0.392491	0.0570722	0.839896
Traip	blue	0.894604	-0.161696	0.666771	0.241901	1186.2	890.4	295.799	594.601	-0.0860289	0.760482	-0.772458	0.000736983	0.858486	4.19535e-05	0.666771	0.00662986	0.894604	6.76465e-06	-0.161696	0.5648	0.241901	0.385063
Zc4h2	blue	0.906307	-0.171378	0.702899	0.1955	1260.34	919.592	340.744	578.848	-0.0903333	0.748845	-0.767849	0.000829505	0.858182	4.25107e-05	0.702899	0.00346887	0.906307	3.24027e-06	-0.171378	0.541394	0.1955	0.485011
Neil2	blue	0.876513	-0.146789	0.651738	0.0314068	1092.6	812.795	279.804	532.991	-0.104099	0.711978	-0.7537	0.00117401	0.857798	4.32223e-05	0.651738	0.0084747	0.876513	1.81055e-05	-0.146789	0.601648	0.0314068	0.911528
Cbl	blue	0.864497	-0.0781159	0.732662	0.14826	1190.69	801.689	388.997	412.693	-0.160489	0.567748	-0.697252	0.00386112	0.857741	4.33292e-05	0.732662	0.00189159	0.864497	3.21236e-05	-0.0781159	0.781997	0.14826	0.597969
Arid3a	blue	0.933531	-0.224781	0.644305	0.164093	1322.62	1055.1	267.527	787.57	-0.0302742	0.914707	-0.827407	0.00014091	0.857681	4.34418e-05	0.644305	0.00952427	0.933531	3.72071e-07	-0.224781	0.420568	0.164093	0.558967
Pde7a	blue	0.902476	-0.176796	0.66532	0.0527614	1158.55	882.959	275.586	607.373	-0.0771647	0.784594	-0.780153	0.000601269	0.857318	4.41273e-05	0.66532	0.00679269	0.902476	4.16491e-06	-0.176796	0.528484	0.0527614	0.851861
Amz1	blue	0.933158	-0.195072	0.668273	0.135363	1371.86	1071.87	299.986	771.886	-0.0527143	0.851992	-0.804404	0.000299545	0.857118	4.45079e-05	0.668273	0.00646455	0.933158	3.85491e-07	-0.195072	0.485987	0.135363	0.630516
Tmem165	blue	0.968735	-0.278701	0.62406	0.0511761	1476.16	1231.32	244.841	986.478	0.0068498	0.980671	-0.863432	3.3711e-05	0.856582	4.55426e-05	0.62406	0.0129023	0.968735	3.01057e-09	-0.278701	0.314474	0.0511761	0.856268
Sult1e1	blue	0.794089	-0.05155	0.706177	-0.0129009	827.546	510.227	317.319	192.908	-0.214484	0.442708	-0.641669	0.00991979	0.856153	4.6384e-05	0.706177	0.00325615	0.794089	0.00040732	-0.05155	0.855228	-0.0129009	0.963604
Wisp2	blue	0.928492	-0.224606	0.6372	0.063048	1258.76	1007.45	251.315	756.13	-0.0339036	0.904523	-0.82202	0.000169711	0.855924	4.68407e-05	0.6372	0.0106197	0.928492	5.90941e-07	-0.224606	0.42094	0.063048	0.823364
Psph	blue	0.918023	-0.236928	0.616671	0.0257429	1206.94	966.048	240.896	725.152	-0.0293935	0.917181	-0.826425	0.000145834	0.855819	4.70502e-05	0.616671	0.0143433	0.918023	1.39971e-06	-0.236928	0.395206	0.0257429	0.92744
Klc1	blue	0.93358	-0.228955	0.659347	0.131502	1302.36	1028.02	274.339	753.676	-0.0324318	0.908651	-0.823345	0.000162216	0.855777	4.71347e-05	0.659347	0.00749656	0.93358	3.70339e-07	-0.228955	0.411761	0.131502	0.640385
Twf2	blue	0.966687	-0.279546	0.617327	0.0612541	1465.23	1225.8	239.429	986.368	0.011327	0.968042	-0.86693	2.87311e-05	0.855602	4.74848e-05	0.617327	0.0142105	0.966687	4.5251e-09	-0.279546	0.312949	0.0612541	0.82832
Anxa8	blue	0.725105	0.0445122	0.756182	0.00222699	779.483	390.033	389.45	0.582819	-0.296738	0.282829	-0.558771	0.0303704	0.855509	4.76739e-05	0.756182	0.00110641	0.725105	0.00222211	0.0445122	0.874838	0.00222699	0.993715
Msmp	blue	-0.724025	-0.0539536	-0.711624	-0.0694848	713.697	388.633	325.064	63.5686	0.295428	0.285061	0.56008	0.0299017	-0.855508	4.76763e-05	-0.711624	0.0029258	-0.724025	0.00227293	-0.0539536	0.848548	-0.0694848	0.805633
Tulp3	blue	0.868166	-0.100349	0.730374	0.249999	1169.33	789.76	379.568	410.192	-0.140756	0.616826	-0.714669	0.00275312	0.855424	4.78453e-05	0.730374	0.00198718	0.868166	2.71238e-05	-0.100349	0.721966	0.249999	0.368848
Tmem138	blue	0.7896	-0.00124547	0.759832	-0.0528475	956.713	536.596	420.117	116.478	-0.242422	0.384008	-0.612162	0.0152817	0.854584	4.95772e-05	0.759832	0.00101277	0.7896	0.000463186	-0.00124547	0.996485	-0.0528475	0.851621
Rinl	blue	0.951636	-0.24496	0.630926	0.077481	1420.66	1161.29	259.372	901.921	-0.0117323	0.966899	-0.842762	7.99682e-05	0.854494	4.97656e-05	0.630926	0.0116665	0.951636	4.92254e-08	-0.24496	0.378893	0.077481	0.78373
1700061J05Rik	blue	0.788971	0.00543734	0.748309	-0.0225277	974.671	566.19	408.48	157.71	-0.224439	0.421295	-0.629844	0.0118549	0.854283	5.02086e-05	0.748309	0.00133232	0.788971	0.000471495	0.00543734	0.984656	-0.0225277	0.936484
Tspan32	blue	0.858741	-0.0856502	0.730381	0.157187	1135.79	758.182	377.61	380.571	-0.163258	0.560994	-0.690895	0.0043442	0.854153	5.04851e-05	0.730381	0.00198691	0.858741	4.14922e-05	-0.0856502	0.761508	0.157187	0.575844
2018-03-01	blue	0.674138	0.18739	0.796687	0.126396	901.659	383.412	518.247	-134.835	-0.384977	0.15649	-0.469096	0.0777357	0.854073	5.06556e-05	0.796687	0.000377587	0.674138	0.0058498	0.18739	0.50365	0.126396	0.653527
Prkcdbp	blue	0.961935	-0.266151	0.625587	0.028913	1447.21	1198.7	248.507	950.197	-0.000516959	0.998541	-0.853353	5.2207e-05	0.85387	5.10891e-05	0.625587	0.0126192	0.961935	1.0642e-08	-0.266151	0.337649	0.028913	0.91853
Cul7	blue	0.939994	-0.237009	0.64165	0.0762747	1321.91	1067.48	254.432	813.049	-0.0354885	0.90008	-0.818373	0.000191825	0.853862	5.1106e-05	0.64165	0.00992264	0.939994	1.94414e-07	-0.237009	0.39504	0.0762747	0.787025
Topbp1	blue	0.964794	-0.267562	0.628933	0.0590054	1460.72	1211.67	249.05	962.624	0.00517915	0.985385	-0.858881	4.12399e-05	0.853702	5.14495e-05	0.628933	0.0120154	0.964794	6.45079e-09	-0.267562	0.334997	0.0590054	0.834541
Mastl	blue	0.747039	0.062922	0.752523	0.266743	832.464	444.207	388.257	55.95	-0.286178	0.301118	-0.567496	0.0273484	0.853674	5.15101e-05	0.752523	0.0012072	0.747039	0.001372	0.062922	0.823712	0.266743	0.336536
Ptpro	blue	0.680755	0.0855419	0.743456	-0.174319	633.718	292.461	341.258	-48.7969	-0.328205	0.232362	-0.525466	0.0442611	0.853671	5.15164e-05	0.743456	0.00148916	0.680755	0.00521272	0.0855419	0.761801	-0.174319	0.534368
Fkbpl	blue	0.931419	-0.251622	0.616363	0.0459442	1243.47	1015.56	227.909	787.649	-0.0131342	0.962946	-0.840456	8.73894e-05	0.85359	5.16903e-05	0.616363	0.0144059	0.931419	4.53599e-07	-0.251622	0.365645	0.0459442	0.870843
Apoa4	blue	0.892288	-0.188003	0.642475	-0.0353523	1102.39	844.758	257.628	587.13	-0.0637171	0.821517	-0.789741	0.000461345	0.853458	5.19769e-05	0.642475	0.00979747	0.892288	7.74642e-06	-0.188003	0.502229	-0.0353523	0.900461
Incenp	blue	0.962153	-0.259748	0.63667	0.109691	1471.82	1209.51	262.31	947.203	-0.000780008	0.997799	-0.852245	5.46707e-05	0.853025	5.29261e-05	0.63667	0.0107052	0.962153	1.02582e-08	-0.259748	0.349834	0.109691	0.697162
Slc23a3	blue	0.782974	-0.0290925	0.744805	-0.0182889	878.555	499.251	379.304	119.947	-0.224076	0.422066	-0.628655	0.0120647	0.852731	5.35773e-05	0.744805	0.00144414	0.782974	0.000556938	-0.0290925	0.918026	-0.0182889	0.948419
Gm527	blue	0.917476	-0.19827	0.667403	0.151902	1252.29	964.344	287.948	676.396	-0.0480711	0.864913	-0.80417	0.000301698	0.852241	5.46799e-05	0.667403	0.00655984	0.917476	1.45963e-06	-0.19827	0.478723	0.151902	0.588902
Cdca2	blue	0.768558	0.000802566	0.705023	-0.100024	857.655	510.611	347.044	163.568	-0.226978	0.415921	-0.624328	0.0128522	0.851306	5.68331e-05	0.705023	0.00332977	0.768558	0.000814677	0.000802566	0.997735	-0.100024	0.722834
Gpr110	blue	-0.702992	-0.0427573	-0.72628	0.108679	655.002	323.229	331.773	-8.54338	0.29381	0.287833	0.557468	0.0308423	-0.851278	5.68993e-05	-0.72628	0.00216791	-0.702992	0.00346266	-0.0427573	0.879739	0.108679	0.699837
Gpx7	blue	0.837867	-0.0669802	0.719519	0.0650485	1030.84	683.595	347.241	336.354	-0.171953	0.540017	-0.6791	0.00536665	0.851053	5.74288e-05	0.719519	0.00249502	0.837867	9.63916e-05	-0.0669802	0.812522	0.0650485	0.817844
2310079F23Rik	blue	0.927286	-0.224021	0.63053	-0.0406109	1239.85	998.926	240.925	758.001	-0.0398389	0.887898	-0.811207	0.00024218	0.851046	5.74443e-05	0.63053	0.0117353	0.927286	6.56825e-07	-0.224021	0.422184	-0.0406109	0.885739
Pik3cg	blue	0.750708	0.0512485	0.746468	-0.0998624	865.555	473.543	392.012	81.5306	-0.278057	0.315641	-0.572888	0.0255982	0.850945	5.76834e-05	0.746468	0.00139016	0.750708	0.00125985	0.0512485	0.856067	-0.0998624	0.723265
Tox	blue	-0.796702	0.0245149	-0.711715	-0.128081	922.691	580.205	342.485	237.72	0.208421	0.456014	0.642122	0.00985093	-0.850543	5.86435e-05	-0.711715	0.00292046	-0.796702	0.000377423	0.0245149	0.930893	-0.128081	0.649179
Hist1h2bg	blue	0.788732	-0.0207574	0.733996	0.341346	867.58	511.695	355.885	155.81	-0.212594	0.446834	-0.637626	0.0105515	0.85022	5.94231e-05	0.733996	0.0018376	0.788732	0.000474682	-0.0207574	0.941467	0.341346	0.213075
Ap3m2	blue	0.955002	-0.266857	0.634985	0.101066	1379.7	1133.94	245.763	888.18	0.00117996	0.99667	-0.851063	5.74046e-05	0.849883	6.02456e-05	0.634985	0.0109806	0.955002	3.10517e-08	-0.266857	0.33632	0.101066	0.720053
Fam55c	blue	0.949342	-0.25443	0.624588	0.16464	1363.95	1123.84	240.117	883.719	-0.00897685	0.97467	-0.840813	8.62062e-05	0.84979	6.04756e-05	0.624588	0.0128038	0.949342	6.6156e-08	-0.25443	0.360138	0.16464	0.557637
Abi2	blue	0.946037	-0.231769	0.641971	0.100317	1396.41	1127.93	268.487	859.438	-0.020461	0.942302	-0.829298	0.000131806	0.849759	6.05508e-05	0.641971	0.00987381	0.946037	9.89647e-08	-0.231769	0.405877	0.100317	0.72205
Scrt2	blue	0.774928	0.0143647	0.778462	0.184862	997.512	509.746	487.767	21.9786	-0.256404	0.356293	-0.593326	0.0197244	0.84973	6.06214e-05	0.778462	0.000629194	0.774928	0.000690949	0.0143647	0.959477	0.184862	0.509526
Cd72	blue	0.923327	-0.180817	0.676189	0.155908	1323.55	1020.41	303.145	717.264	-0.0598368	0.832239	-0.789605	0.000463125	0.849442	6.13368e-05	0.676189	0.0056461	0.923327	9.1812e-07	-0.180817	0.518995	0.155908	0.578992
Ccdc66	blue	0.964087	-0.282738	0.622313	0.0428901	1424.12	1190.27	233.857	956.412	0.0119602	0.966256	-0.861397	3.69229e-05	0.849437	6.13502e-05	0.622313	0.0132324	0.964087	7.32866e-09	-0.282738	0.307221	0.0428901	0.879368
Nes	blue	0.909423	-0.181605	0.690376	0.122107	1241.49	923.955	317.535	606.419	-0.0788914	0.779882	-0.77051	0.00077499	0.849402	6.14371e-05	0.690376	0.00438565	0.909423	2.62088e-06	-0.181605	0.517142	0.122107	0.664637
Tmem125	blue	0.947022	-0.28244	0.610558	0.0817163	1305.04	1084.81	220.227	864.586	0.00709626	0.979976	-0.855582	4.7526e-05	0.848486	6.37587e-05	0.610558	0.0156267	0.947022	8.80062e-08	-0.28244	0.307753	0.0817163	0.772189
Cbx7	blue	0.748614	0.0571096	0.775834	0.23325	879.59	441.168	438.422	2.74555	-0.282975	0.306798	-0.565073	0.0281637	0.848048	6.48937e-05	0.775834	0.000674664	0.748614	0.0013229	0.0571096	0.839792	0.23325	0.402798
Kcne3	blue	0.968024	-0.275823	0.626856	0.133106	1467.71	1223.75	243.965	979.785	0.0122368	0.965476	-0.860208	3.89134e-05	0.847971	6.50944e-05	0.626856	0.0123874	0.968024	3.4781e-09	-0.275823	0.319706	0.133106	0.63628
Tlr4	blue	0.937079	-0.210349	0.661603	0.165698	1355.82	1075.2	280.619	794.582	-0.0389113	0.890494	-0.809003	0.000259679	0.847915	6.52429e-05	0.661603	0.00722426	0.937079	2.62736e-07	-0.210349	0.451761	0.165698	0.555073
4930528F23Rik	blue	0.703229	0.0629972	0.721809	0.202282	646.958	332.193	314.765	17.4277	-0.297945	0.280781	-0.549952	0.0336739	0.847898	6.52869e-05	0.721809	0.00238009	0.703229	0.00344696	0.0629972	0.823504	0.202282	0.469683
Atad2	blue	0.713616	0.0297381	0.67791	-0.107976	652.504	361.133	291.371	69.7624	-0.262398	0.344761	-0.585146	0.0219359	0.847545	6.62192e-05	0.67791	0.00547957	0.713616	0.00281189	0.0297381	0.916213	-0.107976	0.701695
4632428N05Rik	blue	0.952374	-0.244201	0.639692	0.106057	1409.59	1151.65	257.944	893.702	-0.0122699	0.965383	-0.834893	0.00010766	0.847163	6.72381e-05	0.639692	0.0102248	0.952374	4.46227e-08	-0.244201	0.380418	0.106057	0.706778
Hdac7	blue	0.82842	-0.0817117	0.737461	0.136887	1021.58	624.793	396.788	228.005	-0.169663	0.545509	-0.677481	0.00552066	0.847144	6.72909e-05	0.737461	0.00170309	0.82842	0.000135971	-0.0817117	0.772201	0.136887	0.626635
Gm10046	blue	0.744683	0.0261622	0.721349	-0.144464	773.671	434.17	339.501	94.6694	-0.260209	0.348949	-0.586536	0.0215474	0.846745	6.83714e-05	0.721349	0.00240283	0.744683	0.00144816	0.0261622	0.926261	-0.144464	0.60748
Ddx11	blue	0.962079	-0.275077	0.629486	0.153977	1426.68	1184.28	242.399	941.886	0.0128948	0.963621	-0.859487	4.01642e-05	0.846592	6.87894e-05	0.629486	0.0119179	0.962079	1.03873e-08	-0.275077	0.321071	0.153977	0.58376
LOC100047292	blue	0.944073	-0.274987	0.61137	-0.0126904	1279.9	1061.27	218.627	842.643	0.0017836	0.994967	-0.848307	6.42211e-05	0.846523	6.89781e-05	0.61137	0.0154513	0.944073	1.24261e-07	-0.274987	0.321235	-0.0126904	0.964197
Vsig8	blue	0.675943	0.120351	0.783701	0.21487	738.968	310.992	427.976	-116.983	-0.348423	0.203122	-0.498097	0.0588105	0.84652	6.89872e-05	0.783701	0.000545954	0.675943	0.00567021	0.120351	0.669205	0.21487	0.441868
Zfp821	blue	0.93261	-0.245923	0.617223	0.0294472	1259.98	1027.76	232.226	795.529	-0.00695619	0.980371	-0.83922	9.15977e-05	0.846176	6.99368e-05	0.617223	0.0142316	0.93261	4.05947e-07	-0.245923	0.376962	0.0294472	0.91703
Chaf1a	blue	0.885101	-0.170229	0.63597	0.0630973	1080.53	828.677	251.848	576.829	-0.0798025	0.777398	-0.766329	0.000862001	0.846132	7.00604e-05	0.63597	0.010819	0.885101	1.15786e-05	-0.170229	0.544149	0.0630973	0.823228
Tgfb3	blue	0.9667	-0.272595	0.631831	0.0356284	1461.88	1213.15	248.728	964.42	0.0106357	0.969991	-0.856434	4.58314e-05	0.845798	7.09925e-05	0.631831	0.0115109	0.9667	4.51388e-09	-0.272595	0.325633	0.0356284	0.899688
Ppp1r14b	blue	0.962431	-0.29378	0.603656	-0.00703829	1410.59	1187.98	222.611	965.369	0.0259605	0.926828	-0.871687	2.29499e-05	0.845726	7.11957e-05	0.603656	0.0171804	0.962431	9.78484e-09	-0.29378	0.287884	-0.00703829	0.980139
BC005764	blue	0.722248	0.0617651	0.725032	0.00220556	769.023	401.924	367.099	34.8257	-0.291761	0.291364	-0.553777	0.0322097	0.845538	7.17279e-05	0.725032	0.00222552	0.722248	0.00235852	0.0617651	0.826907	0.00220556	0.993776
Sntg2	blue	-0.918156	0.246381	-0.626576	0.0424971	1158.1	926.619	231.478	695.141	0.0269689	0.923993	0.818355	0.00019194	-0.845324	7.23371e-05	-0.626576	0.0124383	-0.918156	1.38552e-06	0.246381	0.376045	0.0424971	0.880466
Fam50b	blue	-0.946288	0.27093	-0.610279	-0.0421136	1331.71	1101.46	230.249	871.208	-0.00818737	0.976898	0.853179	5.25874e-05	-0.844991	7.32919e-05	-0.610279	0.0156874	-0.946288	9.60666e-08	0.27093	0.328714	-0.0421136	0.881538
Tmem106a	blue	0.908052	-0.174044	0.675439	0.145753	1225.36	931.579	293.78	637.799	-0.0694553	0.805714	-0.775474	0.000681101	0.844929	7.34717e-05	0.675439	0.0057199	0.908052	2.87998e-06	-0.174044	0.535025	0.145753	0.604244
Ccdc103	blue	0.91523	-0.215241	0.64069	0.121665	1179.02	933.077	245.939	687.139	-0.036456	0.897369	-0.808414	0.000264528	0.84487	7.36429e-05	0.64069	0.01007	0.91523	1.72834e-06	-0.215241	0.441062	0.121665	0.665787
Tgfbr2	blue	0.947085	-0.244334	0.627111	0.050753	1343.01	1104.89	238.121	866.764	-0.0149349	0.95787	-0.829687	0.000129996	0.844622	7.43657e-05	0.627111	0.0123413	0.947085	8.73437e-08	-0.244334	0.38015	0.050753	0.857445
Gmppb	blue	0.870364	-0.189492	0.616255	-0.0766924	988.041	757.511	230.53	526.981	-0.0764354	0.786586	-0.76802	0.000825912	0.844455	7.48538e-05	0.616255	0.0144278	0.870364	2.44502e-05	-0.189492	0.498788	-0.0766924	0.785884
Ddah2	blue	0.968414	-0.27906	0.624368	0.150117	1464.83	1226.06	238.773	987.287	0.0144992	0.959098	-0.858731	4.15105e-05	0.844232	7.55133e-05	0.624368	0.0128449	0.968414	3.21433e-09	-0.27906	0.313826	0.150117	0.593338
Crip1	blue	0.967717	-0.284069	0.61898	0.0786407	1453.98	1219.48	234.498	984.98	0.0209576	0.940904	-0.865081	3.12802e-05	0.844124	7.58329e-05	0.61898	0.0138803	0.967717	3.69825e-09	-0.284069	0.304851	0.0786407	0.780566
Ift74	blue	0.963365	-0.280751	0.610827	0.0222758	1427	1198.88	228.126	970.751	0.0193666	0.945384	-0.863489	3.36245e-05	0.844122	7.58378e-05	0.610827	0.0155685	0.963365	8.32616e-09	-0.280751	0.310779	0.0222758	0.937193
Rdh9	blue	-0.911038	0.18581	-0.66284	-0.174824	1211.67	933.972	277.695	656.277	0.0539025	0.84869	0.790032	0.000457565	-0.843934	7.63979e-05	-0.66284	0.0070783	-0.911038	2.34101e-06	0.18581	0.507319	-0.174824	0.533168
Ccr5	blue	0.795402	-0.00617068	0.719536	0.126025	940.582	585.886	354.695	231.191	-0.210187	0.452119	-0.633736	0.0111882	0.843923	7.64313e-05	0.719536	0.00249415	0.795402	0.000392073	-0.00617068	0.982587	0.126025	0.654484
Tnfrsf26	blue	0.942441	-0.245429	0.639425	0.0469257	1335.6	1080.74	254.863	825.873	-0.0124964	0.964744	-0.831324	0.000122598	0.84382	7.6739e-05	0.639425	0.0102667	0.942441	1.49211e-07	-0.245429	0.377953	0.0469257	0.868105
Pira11	blue	0.903261	-0.16162	0.674189	0.15941	1223.69	928.984	294.71	634.274	-0.0771035	0.784761	-0.766561	0.000856977	0.843664	7.72071e-05	0.674189	0.00584471	0.903261	3.95931e-06	-0.16162	0.564985	0.15941	0.570389
Slc17a9	blue	0.923064	-0.255598	0.619412	0.0427844	1171.74	949.847	221.898	727.95	-0.0224428	0.936723	-0.820916	0.000176172	0.843359	7.81327e-05	0.619412	0.0137949	0.923064	9.38152e-07	-0.255598	0.35786	0.0427844	0.879664
Gas2l1	blue	0.943306	-0.242784	0.630234	0.0892554	1350.45	1101.92	248.525	853.398	-0.00484131	0.986338	-0.838495	9.41423e-05	0.843336	7.82018e-05	0.630234	0.0117869	0.943306	1.35511e-07	-0.242784	0.383275	0.0892554	0.751754
Mex3a	blue	0.73799	0.00762748	0.669539	-0.0880086	736.085	428.58	307.505	121.075	-0.235645	0.397846	-0.60756	0.0162877	0.843205	7.86026e-05	0.669539	0.0063277	0.73799	0.00168327	0.00762748	0.978477	-0.0880086	0.755123
Nxn	blue	0.958812	-0.268607	0.639378	0.110109	1404.71	1154.9	249.814	905.085	0.00233792	0.993402	-0.845503	7.18284e-05	0.843165	7.87255e-05	0.639378	0.010274	0.958812	1.76341e-08	-0.268607	0.333041	0.110109	0.69606
Sox4	blue	0.973803	-0.302455	0.608002	0.0758714	1474.44	1250.09	224.343	1025.75	0.0347969	0.902018	-0.877746	1.70147e-05	0.842949	7.93887e-05	0.608002	0.0161889	0.973803	9.65356e-10	-0.302455	0.273211	0.0758714	0.788128
Srcrb4d	blue	0.885579	-0.150047	0.701781	0.20613	1146.7	820.688	326.016	494.672	-0.0978682	0.728597	-0.744778	0.00144503	0.842646	8.03281e-05	0.701781	0.00354388	0.885579	1.12822e-05	-0.150047	0.593512	0.20613	0.461092
Rnase6	blue	0.888022	-0.178843	0.643026	0.125354	1099.33	841.272	258.062	583.21	-0.058875	0.834901	-0.783236	0.000552958	0.842111	8.2008e-05	0.643026	0.0097146	0.888022	9.86571e-06	-0.178843	0.523644	0.125354	0.65622
Uaca	blue	0.942371	-0.233641	0.642422	0.121741	1332.06	1079.42	252.64	826.778	-0.0280052	0.921081	-0.813697	0.000223584	0.841703	8.33098e-05	0.642422	0.00980552	0.942371	1.50369e-07	-0.233641	0.401988	0.121741	0.665589
Gli3	blue	0.853755	-0.136117	0.640198	-0.0912498	985.85	726.106	259.744	466.361	-0.111229	0.693107	-0.730229	0.00199337	0.841458	8.40981e-05	0.640198	0.0101461	0.853755	5.13344e-05	-0.136117	0.628596	-0.0912498	0.746374
Kdelr3	blue	0.91647	-0.219487	0.644501	0.083561	1205.81	950.811	254.996	695.815	-0.029961	0.915587	-0.811492	0.000239994	0.841453	8.41149e-05	0.644501	0.0094953	0.91647	1.57536e-06	-0.219487	0.43188	0.083561	0.767175
Slc31a2	blue	0.94813	-0.24115	0.632086	0.119923	1369.43	1123.12	246.311	876.808	-0.00984716	0.972216	-0.831073	0.000123707	0.84092	8.58512e-05	0.632086	0.0114672	0.94813	7.69211e-08	-0.24115	0.386585	0.119923	0.670322
Wdr90	blue	0.913329	-0.210825	0.65233	0.186514	1174.14	918.919	255.225	663.694	-0.0483832	0.864043	-0.792267	0.000429292	0.840651	8.67425e-05	0.65233	0.0083952	0.913329	1.98704e-06	-0.210825	0.450715	0.186514	0.505681
Hpdl	blue	0.817134	-0.115701	0.669766	-0.00802452	822.388	558.655	263.733	294.921	-0.136808	0.626836	-0.703371	0.00343754	0.840179	8.83184e-05	0.669766	0.0063034	0.817134	0.000199857	-0.115701	0.681353	-0.00802452	0.977357
4930544I03Rik	blue	-0.672934	-0.0710988	-0.677153	0.144102	629.922	311.023	318.899	-7.87618	0.294945	0.285886	0.544395	0.0358899	-0.83934	9.11811e-05	-0.677153	0.00555226	-0.672934	0.00597207	-0.0710988	0.801201	0.144102	0.60839
Dnajb1	blue	0.944493	-0.266789	0.621587	0.118367	1283.95	1061.85	222.096	839.755	0.00355737	0.989961	-0.842664	8.02713e-05	0.839107	9.19913e-05	0.621587	0.0133715	0.944493	1.18436e-07	-0.266789	0.336449	0.118367	0.674378
Pdgfa	blue	0.970261	-0.29929	0.604736	0.0548381	1442.06	1224.04	218.027	1006.01	0.0302026	0.914909	-0.868443	2.67738e-05	0.838241	9.5048e-05	0.604736	0.0169298	0.970261	2.18281e-09	-0.29929	0.278512	0.0548381	0.846093
Dynlt1c	blue	0.976007	-0.308676	0.602584	0.0845357	1475.88	1260.16	215.721	1044.44	0.0438593	0.876661	-0.882019	1.36469e-05	0.83816	9.5338e-05	0.602584	0.0174319	0.976007	5.4816e-10	-0.308676	0.26297	0.0845357	0.76453
4931408A02Rik	blue	0.947986	-0.268187	0.60818	-0.0088848	1318.14	1097.54	220.592	876.953	0.00629633	0.982233	-0.844324	7.52408e-05	0.838027	9.58132e-05	0.60818	0.0161492	0.947986	7.82853e-08	-0.268187	0.333826	-0.0088848	0.97493
Tcrg-C	blue	0.823616	-0.0723975	0.724135	0.142116	948.142	603.396	344.746	258.65	-0.166768	0.552485	-0.671255	0.0061459	0.838023	9.5829e-05	0.724135	0.00226771	0.823616	0.000160718	-0.0723975	0.797638	0.142116	0.613389
Alas2	blue	-0.952649	0.292804	-0.596657	-0.00877308	1316.5	1112.93	203.566	909.366	-0.0221187	0.937635	0.860068	3.91534e-05	-0.83795	9.60941e-05	-0.596657	0.0188745	-0.952649	4.3004e-08	0.292804	0.289563	-0.00877308	0.975245
Ndrg1	blue	0.930208	-0.230505	0.624981	0.0679108	1273.86	1033.35	240.513	792.838	-0.018623	0.947478	-0.819257	0.00018626	0.83788	9.63454e-05	0.624981	0.012731	0.930208	5.06769e-07	-0.230505	0.408514	0.0679108	0.809961
Mier2	blue	0.97493	-0.302291	0.609958	0.108383	1477.3	1254.85	222.457	1032.39	0.0403027	0.886601	-0.878009	1.67895e-05	0.837706	9.6977e-05	0.609958	0.0157572	0.97493	7.27302e-10	-0.302291	0.273484	0.108383	0.70062
Cklf	blue	0.941114	-0.252443	0.606776	0.0545914	1309.19	1084.47	224.719	859.75	-0.00316628	0.991065	-0.834477	0.000109322	0.837643	9.72047e-05	0.606776	0.016464	0.941114	1.72473e-07	-0.252443	0.364029	0.0545914	0.846778
Exosc6	blue	0.953518	-0.288452	0.600509	0.0185336	1346.77	1132.28	214.484	917.798	0.0320706	0.909665	-0.869679	2.52592e-05	0.837608	9.73325e-05	0.600509	0.017927	0.953518	3.82017e-08	-0.288452	0.297123	0.0185336	0.94773
Vsig10	blue	0.877795	-0.144395	0.689303	0.204383	1076.87	780.076	296.796	483.281	-0.109549	0.697539	-0.727927	0.0020937	0.837475	9.7818e-05	0.689303	0.00447229	0.877795	1.69724e-05	-0.144395	0.607651	0.204383	0.464982
Snapc3	blue	0.946646	-0.25196	0.626273	0.0542864	1354.83	1110.39	244.446	865.941	0.00629212	0.982244	-0.843706	7.70817e-05	0.837414	9.80436e-05	0.626273	0.0124935	0.946646	9.20613e-08	-0.25196	0.364979	0.0542864	0.847624
Loxl2	blue	0.897267	-0.173319	0.643118	0.0386419	1163.53	896.492	267.038	629.453	-0.0645978	0.819087	-0.772484	0.000736484	0.837081	9.927e-05	0.643118	0.00970078	0.897267	5.76613e-06	-0.173319	0.536752	0.0386419	0.891248
Cd200r1	blue	0.8641	-0.117264	0.669347	-0.0790668	1035.88	756.856	279.024	477.832	-0.119406	0.671668	-0.717633	0.00259294	0.83704	9.94252e-05	0.669347	0.00634832	0.8641	3.27084e-05	-0.117264	0.677262	-0.0790668	0.779404
Rpa2	blue	0.927894	-0.243645	0.617734	0.0704324	1207.21	986.055	221.156	764.899	-0.0242478	0.931645	-0.812506	0.000232328	0.836754	0.00010049	0.617734	0.0141287	0.927894	6.22871e-07	-0.243645	0.381539	0.0704324	0.80303
Icam2	blue	0.791044	0.000137549	0.718453	0.153679	931.736	577.64	354.095	223.545	-0.222926	0.424515	-0.613772	0.0149413	0.836698	0.0001007	0.718453	0.00254998	0.791044	0.000444576	0.000137549	0.999612	0.153679	0.584498
Pold1	blue	0.977263	-0.311502	0.596967	0.128905	1479.09	1268.14	210.944	1057.2	0.0448528	0.873888	-0.881495	1.40271e-05	0.836642	0.000100909	0.596967	0.018797	0.977263	3.87631e-10	-0.311502	0.258398	0.128905	0.647057
Wipf1	blue	0.936451	-0.222074	0.645201	0.125232	1315.25	1058.72	256.532	802.185	-0.0263006	0.925872	-0.810161	0.000250365	0.836461	0.000101591	0.645201	0.00939254	0.936451	2.79849e-07	-0.222074	0.426334	0.125232	0.656535
Setd7	blue	0.943598	-0.25224	0.617488	0.0179823	1326.3	1091.24	235.055	856.188	0.006619	0.981322	-0.842603	8.04601e-05	0.835984	0.000103407	0.617488	0.0141781	0.943598	1.3113e-07	-0.25224	0.364429	0.0179823	0.949283
Exoc1	blue	0.976018	-0.312437	0.60038	0.138651	1463.13	1252.48	210.65	1041.83	0.0459876	0.870722	-0.881911	1.37248e-05	0.835923	0.000103642	0.60038	0.0179582	0.976018	5.46524e-10	-0.312437	0.256895	0.138651	0.622155
Kif18a	blue	0.920071	-0.228633	0.638714	0.204863	1174.91	939.733	235.177	704.556	-0.0297223	0.916257	-0.805897	0.000286085	0.83562	0.000104814	0.638714	0.0103785	0.920071	1.1935e-06	-0.228633	0.412437	0.204863	0.463911
4931428F04Rik	blue	0.905863	-0.22416	0.618779	0.0883046	1073.82	863.519	210.304	653.215	-0.0419267	0.88206	-0.79354	0.000413844	0.835467	0.000105407	0.618779	0.01392	0.905863	3.33769e-06	-0.22416	0.421888	0.0883046	0.754323
Bok	blue	0.941029	-0.251468	0.618542	0.143079	1292.6	1066.8	225.795	841.004	-0.00513858	0.985499	-0.829938	0.000128838	0.835076	0.000106937	0.618542	0.0139671	0.941029	1.7407e-07	-0.251468	0.365949	0.143079	0.610964
Gm3604	blue	0.778825	-0.00829912	0.725006	0.103189	819.831	485.886	333.945	151.941	-0.234447	0.40032	-0.600046	0.0180388	0.834493	0.000109258	0.725006	0.00222676	0.778825	0.000623106	-0.00829912	0.976582	0.103189	0.714397
Megf8	blue	0.947997	-0.283481	0.584536	0.007101	1307.29	1106.02	201.274	904.744	0.0226193	0.936226	-0.856671	4.53697e-05	0.834051	0.000111041	0.584536	0.0221082	0.947997	7.81805e-08	-0.283481	0.305897	0.007101	0.979962
Xirp1	blue	0.703579	0.0927802	0.786469	0.0118034	820.623	356.019	464.604	-108.584	-0.327851	0.232896	-0.50581	0.0544002	0.833661	0.000112638	0.786469	0.000505744	0.703579	0.00342385	0.0927802	0.742252	0.0118034	0.966699
Dok1	blue	0.950534	-0.267864	0.610718	0.033017	1352.26	1127.07	225.198	901.868	0.0169729	0.952127	-0.850403	5.89786e-05	0.833431	0.000113589	0.610718	0.015592	0.950534	5.68343e-08	-0.267864	0.334431	0.033017	0.90701
Arhgap9	blue	0.966963	-0.296214	0.599872	0.0996295	1425.88	1212.46	213.416	999.045	0.0377272	0.893808	-0.870968	2.37557e-05	0.833241	0.000114379	0.599872	0.0180811	0.966963	4.28981e-09	-0.296214	0.28372	0.0996295	0.723887
Lrfn4	blue	0.913782	-0.244126	0.597996	0.0249327	1108.77	910.237	198.537	711.7	-0.0209931	0.940804	-0.812232	0.000234381	0.833225	0.000114444	0.597996	0.0185408	0.913782	1.92264e-06	-0.244126	0.380569	0.0249327	0.929718
Inpp5j	blue	0.876148	-0.180623	0.609975	0.050161	1025.52	795.326	230.191	565.135	-0.0664925	0.813865	-0.7665	0.000858303	0.832992	0.000115418	0.609975	0.0157536	0.876148	1.84395e-05	-0.180623	0.51945	0.050161	0.859093
1110054O05Rik	blue	0.949551	-0.270211	0.61103	0.0863523	1343.31	1117.24	226.073	891.168	0.0211178	0.940453	-0.853964	5.08876e-05	0.832846	0.000116033	0.61103	0.0155245	0.949551	6.44303e-08	-0.270211	0.33005	0.0863523	0.759606
Sfpi1	blue	0.893453	-0.178016	0.631669	0.0379002	1125.51	877.479	248.03	629.449	-0.0603666	0.830774	-0.77223	0.000741347	0.832596	0.000117088	0.631669	0.0115387	0.893453	7.23857e-06	-0.178016	0.525597	0.0379002	0.893324
Tmem132a	blue	0.956017	-0.2708	0.622389	0.0109188	1366.05	1138.24	227.81	910.429	0.00721717	0.979635	-0.839589	9.03253e-05	0.832371	0.000118047	0.622389	0.0132179	0.956017	2.68375e-08	-0.2708	0.328955	0.0109188	0.969193
Zmat3	blue	0.969104	-0.312367	0.587891	0.0322264	1403.77	1205.82	197.942	1007.88	0.0461919	0.870152	-0.878558	1.63264e-05	0.832366	0.00011807	0.587891	0.0211738	0.969104	2.78932e-09	-0.312367	0.257007	0.0322264	0.909228
Ccdc19	blue	0.920353	-0.226209	0.618142	0.168968	1199.47	972.136	227.334	744.803	-0.0270095	0.923879	-0.805197	0.000292329	0.832207	0.000118753	0.618142	0.014047	0.920353	1.16721e-06	-0.226209	0.417546	0.168968	0.54718
Zdhhc24	blue	0.960751	-0.309791	0.584529	0.0634547	1340.51	1148	192.515	955.48	0.0381781	0.892546	-0.869985	2.48955e-05	0.831807	0.000120483	0.584529	0.0221103	0.960751	1.29495e-08	-0.309791	0.261161	0.0634547	0.822241
Car9	blue	0.690935	0.112268	0.789553	0.0922186	817.652	345.135	472.517	-127.382	-0.346831	0.205334	-0.48494	0.0669254	0.831771	0.00012064	0.789553	0.000463803	0.690935	0.00434098	0.112268	0.69037	0.0922186	0.743764
Prdm16	blue	0.778713	-0.0805241	0.64564	-0.217465	703.259	465.828	237.431	228.397	-0.175737	0.530998	-0.655938	0.00792313	0.831675	0.000121057	0.64564	0.00932855	0.778713	0.000624976	-0.0805241	0.775433	-0.217465	0.43624
Polr2d	blue	0.939267	-0.271166	0.593143	0.00865511	1277.29	1065.86	211.423	854.44	0.0170526	0.951902	-0.848512	6.36918e-05	0.831459	0.000122001	0.593143	0.0197721	0.939267	2.09869e-07	-0.271166	0.328276	0.00865511	0.975578
Fcgr1	blue	0.888767	-0.188657	0.62774	0.129902	1083.08	843.653	239.425	604.228	-0.046872	0.868255	-0.784258	0.000537657	0.83113	0.000123455	0.62774	0.012228	0.888767	9.46447e-06	-0.188657	0.500715	0.129902	0.644493
Zfp934	blue	0.856533	-0.130567	0.682195	0.263884	957.795	685.024	272.771	412.253	-0.114957	0.683305	-0.716002	0.00268012	0.830959	0.000124215	0.682195	0.00508165	0.856533	4.56382e-05	-0.130567	0.642786	0.263884	0.341935
Fam64a	blue	0.847071	-0.126101	0.661836	0.218276	909.61	658.961	250.649	408.313	-0.125005	0.657124	-0.705898	0.00327382	0.830903	0.000124468	0.661836	0.00719655	0.847071	6.74865e-05	-0.126101	0.654287	0.218276	0.434487
Fam57a	blue	0.927596	-0.253091	0.628295	-0.0337595	1185.33	963.135	222.197	740.938	-0.0116137	0.967233	-0.819215	0.000186522	0.830829	0.000124798	0.628295	0.0121287	0.927596	6.39318e-07	-0.253091	0.362757	-0.0337595	0.904927
Pole2	blue	0.920166	-0.212604	0.632497	0.173881	1228.34	983.514	244.826	738.688	-0.0334088	0.905911	-0.797102	0.000373007	0.830511	0.000126226	0.632497	0.0113972	0.920166	1.18456e-06	-0.212604	0.446813	0.173881	0.535413
Ubxn2b	blue	0.958264	-0.296105	0.604226	0.0627547	1335.02	1130.54	204.473	926.071	0.0259793	0.926775	-0.855995	4.66983e-05	0.830016	0.000128481	0.604226	0.0170479	0.958264	1.91909e-08	-0.296105	0.283906	0.0627547	0.824174
Zdhhc12	blue	0.950133	-0.311866	0.568248	0.0041478	1279.35	1097.18	182.173	915.008	0.0415214	0.883193	-0.871522	2.31319e-05	0.830001	0.000128548	0.568248	0.0270989	0.950133	5.98357e-08	-0.311866	0.257812	0.0041478	0.988295
Kbtbd8	blue	0.69861	0.019699	0.674576	-0.0375798	574.064	308.855	265.209	43.6457	-0.250044	0.368758	-0.579939	0.0234391	0.829984	0.000128628	0.674576	0.00580582	0.69861	0.00376372	0.019699	0.944448	-0.0375798	0.894221
Plekha7	blue	0.929452	-0.284171	0.584362	0.00226698	1149.98	964.926	185.053	779.873	0.0104306	0.97057	-0.840166	8.83625e-05	0.829735	0.000129772	0.584362	0.0221576	0.929452	5.42505e-07	-0.284171	0.30467	0.00226698	0.993602
Gipc1	blue	0.971474	-0.313081	0.58526	0.0563924	1428.77	1229.81	198.959	1030.85	0.0485772	0.863503	-0.878072	1.67352e-05	0.829495	0.000130886	0.58526	0.021904	0.971474	1.66984e-09	-0.313081	0.255864	0.0563924	0.841781
Arhgap27	blue	0.714885	0.0705207	0.759232	-0.0236728	743.92	365.395	378.525	-13.13	-0.281615	0.309228	-0.547876	0.0344894	0.829492	0.000130903	0.759232	0.00102771	0.714885	0.00274116	0.0705207	0.802788	-0.0236728	0.933262
Alg12	blue	0.927833	-0.248561	0.637175	0.00649013	1210.86	972.818	238.046	734.772	-0.0205095	0.942165	-0.80882	0.000261178	0.82933	0.000131658	0.637175	0.0106238	0.927833	6.26222e-07	-0.248561	0.3717	0.00649013	0.981686
Ctss	blue	0.822322	-0.0535844	0.707254	0.136406	962.682	638.938	323.744	315.194	-0.165959	0.554442	-0.663182	0.00703839	0.829141	0.000132545	0.707254	0.00318853	0.822322	0.000167976	-0.0535844	0.849574	0.136406	0.627859
Creb3l4	blue	0.832636	-0.108048	0.64634	-0.00550362	857.199	619.996	237.204	382.792	-0.137039	0.626249	-0.691601	0.00428829	0.82864	0.000134918	0.64634	0.00922728	0.832636	0.000116922	-0.108048	0.701505	-0.00550362	0.984469
Gzmm	blue	0.930942	-0.258814	0.633372	0.0372052	1211.14	980.996	230.146	750.85	-0.00293644	0.991713	-0.825334	0.000151475	0.82827	0.000136691	0.633372	0.0112494	0.930942	4.73968e-07	-0.258814	0.35163	0.0372052	0.89527
Sesn2	blue	0.895116	-0.213057	0.644992	0.232774	1041.4	809.082	232.315	576.766	-0.0401046	0.887155	-0.788129	0.000482804	0.828233	0.000136869	0.644992	0.00942317	0.895116	6.56206e-06	-0.213057	0.445822	0.232774	0.403786
Kcnk10	blue	-0.881386	0.208237	-0.623465	-0.0607907	969.356	757.123	212.233	544.89	0.037158	0.895402	0.790881	0.00044665	-0.828039	0.000137811	-0.623465	0.013014	-0.881386	1.41073e-05	0.208237	0.45642	-0.0607907	0.829601
Olfr810	blue	0.719482	0.0758696	0.784547	0.182277	858.712	390.341	468.37	-78.0285	-0.295712	0.284576	-0.532012	0.0412179	0.827724	0.000139348	0.784547	0.000533391	0.719482	0.00249691	0.0758696	0.788133	0.182277	0.515567
Tppp3	blue	0.742015	-0.0322785	0.643983	-0.22215	637.583	396.869	240.715	156.154	-0.207567	0.457903	-0.620135	0.0136531	0.827702	0.000139457	0.643983	0.00957179	0.742015	0.00153849	-0.0322785	0.909082	-0.22215	0.426171
Ptpn18	blue	0.96021	-0.284546	0.609825	0.149536	1385.17	1167.8	217.37	950.432	0.0293072	0.917423	-0.857007	4.47212e-05	0.827699	0.000139469	0.609825	0.0157863	0.96021	1.41368e-08	-0.284546	0.304005	0.149536	0.594787
Slc4a3	blue	0.811274	-0.0784613	0.715674	0.219095	885.245	554.612	330.633	223.978	-0.171244	0.541715	-0.655859	0.00793333	0.827102	0.000142422	0.715674	0.00269793	0.811274	0.000241663	-0.0784613	0.781055	0.219095	0.432723
Gpr56	blue	0.940991	-0.246356	0.639536	0.180811	1297.17	1055.65	241.524	814.122	-0.00589556	0.983363	-0.82067	0.000177638	0.826566	0.000145121	0.639536	0.0102492	0.940991	1.74784e-07	-0.246356	0.376096	0.180811	0.519009
Gm5914	blue	0.848082	-0.146348	0.666541	-0.108593	889.313	636.26	253.052	383.208	-0.0998502	0.723297	-0.726708	0.00214843	0.826558	0.00014516	0.666541	0.00665548	0.848082	6.48046e-05	-0.146348	0.602751	-0.108593	0.700063
Prssl1	blue	-0.773948	0.0659216	-0.635426	0.11303	699.718	465.409	234.31	231.099	0.164928	0.556938	0.661192	0.00727325	-0.826121	0.000147391	-0.635426	0.010908	-0.773948	0.000708928	0.0659216	0.815438	0.11303	0.688365
Gm4532	blue	0.925037	-0.249758	0.59308	0.0498928	1194.7	987.784	206.916	780.868	-0.00057707	0.998371	-0.825355	0.000151361	0.825933	0.000148359	0.59308	0.0197883	0.925037	7.96247e-07	-0.249758	0.369326	0.0498928	0.859839
2510012J08Rik	blue	0.964456	-0.31836	0.579826	0.0695022	1369.26	1179.29	189.963	989.331	0.0595756	0.832962	-0.885138	1.15556e-05	0.825562	0.00015028	0.579826	0.0234727	0.964456	6.85907e-09	-0.31836	0.247502	0.0695022	0.805585
Rab31	blue	0.929072	-0.221632	0.634732	0.161331	1265.03	1022.83	242.201	780.629	-0.018835	0.946881	-0.806093	0.000284362	0.824928	0.000153619	0.634732	0.0110223	0.929072	5.61263e-07	-0.221632	0.427279	0.161331	0.56569
Smad3	blue	0.95857	-0.301495	0.595078	-0.0285139	1329.28	1131.28	198.003	933.274	0.0380546	0.892892	-0.862907	3.45167e-05	0.824852	0.000154021	0.595078	0.0192739	0.95857	1.83073e-08	-0.301495	0.274811	-0.0285139	0.919651
Unc13b	blue	0.868119	-0.191784	0.598908	-0.0469851	946.233	738.484	207.749	530.735	-0.048984	0.86237	-0.775636	0.000678195	0.82462	0.000155259	0.598908	0.0183162	0.868119	2.71828e-05	-0.191784	0.49351	-0.0469851	0.86794
Fem1b	blue	0.976843	-0.333722	0.578469	0.0320823	1434.06	1246.22	187.833	1058.39	0.0693126	0.806107	-0.89373	7.12202e-06	0.824418	0.000156348	0.578469	0.0238775	0.976843	4.36132e-10	-0.333722	0.224136	0.0320823	0.909632
Mfap3	blue	0.971604	-0.325975	0.58427	0.109701	1398.23	1210.33	187.903	1022.43	0.0625905	0.824627	-0.886876	1.05107e-05	0.824285	0.000157062	0.58427	0.0221837	0.971604	1.62158e-09	-0.325975	0.23574	0.109701	0.697135
Hinfp	blue	0.935412	-0.258213	0.620224	-0.0309162	1224.95	1011.24	213.713	797.526	0.000614042	0.998267	-0.824772	0.000154446	0.824158	0.00015775	0.620224	0.0136357	0.935412	3.10159e-07	-0.258213	0.35279	-0.0309162	0.912905
Pigw	blue	0.897835	-0.22136	0.63309	-0.0336133	1053.26	825.82	227.437	598.383	-0.0246162	0.930608	-0.798905	0.000353634	0.823521	0.00016124	0.63309	0.0112969	0.897835	5.56963e-06	-0.22136	0.42786	-0.0336133	0.905337
Lyve1	blue	0.836522	-0.0644485	0.707453	0.0788414	1005.35	678.598	326.75	351.847	-0.153023	0.586122	-0.670249	0.00625196	0.823272	0.00016262	0.707453	0.00317622	0.836522	0.000101361	-0.0644485	0.819499	0.0788414	0.780018
LOC106740	blue	0.917974	-0.239828	0.604888	0.0181272	1178.24	959.197	219.047	740.15	-0.00175751	0.99504	-0.821439	0.000173085	0.823197	0.000163039	0.604888	0.0168948	0.917974	1.40506e-06	-0.239828	0.389273	0.0181272	0.948875
Fam102b	blue	0.843109	-0.0903801	0.672457	0.069497	989.702	703.822	285.881	417.941	-0.131065	0.641507	-0.690945	0.0043402	0.82201	0.00016977	0.672457	0.00602106	0.843109	7.88962e-05	-0.0903801	0.748719	0.069497	0.8056
Cdr2l	blue	0.976477	-0.32129	0.579895	0.0838432	1452.15	1259.13	193.024	1066.11	0.0630112	0.823465	-0.884657	1.18591e-05	0.821646	0.000171877	0.579895	0.0234521	0.976477	4.82542e-10	-0.32129	0.242933	0.0838432	0.766409
1700010I14Rik	blue	0.844083	-0.110187	0.714402	0.151039	1012.23	664.921	347.309	317.611	-0.130282	0.643516	-0.691011	0.00433495	0.821293	0.000173942	0.714402	0.0027679	0.844083	7.59532e-05	-0.110187	0.695854	0.151039	0.591046
Acss1	blue	0.947929	-0.261251	0.627897	0.121038	1325.46	1094.57	230.892	863.674	0.00764182	0.978437	-0.828759	0.00013435	0.821117	0.000174979	0.627897	0.0121999	0.947929	7.88382e-08	-0.261251	0.346952	0.121038	0.667418
Tbc1d10b	blue	0.976219	-0.333175	0.57679	0.0692286	1439.06	1249.99	189.073	1060.92	0.0742036	0.79269	-0.895253	6.50871e-06	0.82105	0.000175378	0.57679	0.0243856	0.976219	5.1774e-10	-0.333175	0.224943	0.0692286	0.806337
Epha2	blue	0.966196	-0.329384	0.576349	-0.0300452	1363.2	1179.17	184.035	995.135	0.067818	0.810217	-0.888229	9.75296e-06	0.820411	0.000179196	0.576349	0.0245204	0.966196	4.97009e-09	-0.329384	0.230589	-0.0300452	0.915351
Mphosph9	blue	0.797036	-0.0823892	0.691623	0.0744793	765.244	487.728	277.516	210.212	-0.148314	0.597833	-0.671699	0.00609954	0.820014	0.000181602	0.691623	0.00428654	0.797036	0.000373731	-0.0823892	0.770359	0.0744793	0.791936
Tchp	blue	0.974786	-0.324583	0.588909	0.139194	1426.16	1233.34	192.817	1040.52	0.0628467	0.82392	-0.882853	1.30589e-05	0.820007	0.000181645	0.588909	0.0208962	0.974786	7.54599e-10	-0.324583	0.237863	0.139194	0.620779
Cdyl2	blue	0.952636	-0.298672	0.590135	-0.0317912	1283.54	1092.49	191.049	901.438	0.036555	0.897091	-0.856373	4.59513e-05	0.819818	0.000182797	0.590135	0.020566	0.952636	4.30738e-08	-0.298672	0.279553	-0.0317912	0.910449
1500011H22Rik	blue	0.973929	-0.344818	0.570509	0.0284785	1396.47	1218.97	177.493	1041.48	0.077105	0.784757	-0.896647	5.98661e-06	0.819542	0.000184492	0.570509	0.0263597	0.973929	9.35824e-10	-0.344818	0.208153	0.0284785	0.919751
Foxj2	blue	0.842368	-0.150027	0.650467	0.110679	832.166	610.127	222.039	388.087	-0.113955	0.685934	-0.705505	0.00329886	0.81946	0.000184999	0.650467	0.0086474	0.842368	8.11954e-05	-0.150027	0.593563	0.110679	0.694556
Arrdc1	blue	0.978316	-0.331484	0.57558	0.112848	1441.56	1257	184.563	1072.44	0.0690019	0.806961	-0.888252	9.74047e-06	0.81925	0.000186305	0.57558	0.0247566	0.978316	2.85559e-10	-0.331484	0.22745	0.112848	0.688845
Pin1	blue	0.755441	0.0271314	0.765678	0.231246	884.994	459.569	425.425	34.1437	-0.243389	0.382055	-0.575799	0.0246893	0.819187	0.000186693	0.765678	0.000876228	0.755441	0.00112626	0.0271314	0.923536	0.231246	0.406968
4933421O10Rik	blue	0.946411	-0.308133	0.566987	-0.0148458	1252.72	1075.1	177.611	897.494	0.0510597	0.856592	-0.870049	2.48194e-05	0.818989	0.00018793	0.566987	0.0275181	0.946411	9.46797e-08	-0.308133	0.263856	-0.0148458	0.958121
Tinagl1	blue	0.850871	-0.103882	0.673977	0.119305	990.157	712.859	277.297	435.562	-0.124624	0.65811	-0.69411	0.0040942	0.818734	0.000189536	0.673977	0.00586607	0.850871	5.786e-05	-0.103882	0.712554	0.119305	0.671931
Lamc1	blue	0.965096	-0.296729	0.592999	0.0592687	1392.76	1191.3	201.456	989.847	0.0467678	0.868546	-0.86531	3.09543e-05	0.818543	0.000190747	0.592999	0.0198095	0.965096	6.10473e-09	-0.296729	0.282845	0.0592687	0.833812
Usp35	blue	0.834364	-0.120293	0.689058	0.336614	880.551	601.345	279.207	322.138	-0.117197	0.677438	-0.70104	0.00359434	0.818236	0.000192699	0.689058	0.00449235	0.834364	0.000109777	-0.120293	0.669358	0.336614	0.219899
Atxn1	blue	-0.842612	0.178604	-0.630192	-0.0546304	799.812	597.649	202.163	395.486	0.0902129	0.74917	0.727947	0.00209279	-0.81816	0.000193187	-0.630192	0.0117942	-0.842612	8.0433e-05	0.178604	0.524208	-0.0546304	0.846669
Tmem189	blue	0.924688	-0.253572	0.633753	0.112706	1176.92	945.903	231.022	714.881	-0.00716909	0.97977	-0.810692	0.000246179	0.817861	0.000195109	0.633753	0.0111854	0.924688	8.19961e-07	-0.253572	0.361816	0.112706	0.689218
Ints3	blue	0.940017	-0.28911	0.608178	-0.00524942	1215.94	1014.01	201.924	812.089	0.022426	0.93677	-0.840223	8.81699e-05	0.817797	0.000195524	0.608178	0.0161497	0.940017	1.93941e-07	-0.28911	0.295971	-0.00524942	0.985186
Esm1	blue	0.956095	-0.292424	0.601679	0.019321	1325.9	1122.58	203.323	919.253	0.0344747	0.902922	-0.852174	5.48326e-05	0.817699	0.000196161	0.601679	0.0176465	0.956095	2.65366e-08	-0.292424	0.290219	0.019321	0.945512
Ankrd12	blue	0.94541	-0.272355	0.625711	0.173231	1280.12	1056.88	223.236	833.649	0.0232469	0.934461	-0.84084	8.61149e-05	0.817593	0.000196847	0.625711	0.0125963	0.94541	1.06517e-07	-0.272355	0.326076	0.173231	0.536963
Neu3	blue	0.963271	-0.329154	0.573217	-0.045879	1337.92	1156.83	181.087	975.745	0.0685832	0.808112	-0.885965	1.10482e-05	0.817381	0.000198231	0.573217	0.0254942	0.963271	8.46432e-09	-0.329154	0.230934	-0.045879	0.871024
Rnf24	blue	0.957216	-0.302396	0.584869	0.0805472	1329.98	1137.05	192.924	944.129	0.0563086	0.842013	-0.873543	2.09736e-05	0.817234	0.000199198	0.584869	0.022014	0.957216	2.24901e-08	-0.302396	0.27331	0.0805472	0.77537
Lrrc1	blue	0.94145	-0.266721	0.608222	-0.017622	1254.35	1044.94	209.411	835.525	0.0250889	0.929279	-0.842057	8.21784e-05	0.816968	0.000200951	0.608222	0.01614	0.94145	1.66307e-07	-0.266721	0.336576	-0.017622	0.950298
Kif23	blue	0.875781	-0.176873	0.643402	0.214646	1015.82	774.908	240.912	533.996	-0.0502094	0.858958	-0.766649	0.000855066	0.816859	0.000201676	0.643402	0.00965825	0.875781	1.87799e-05	-0.176873	0.528303	0.214646	0.442355
Tsc22d4	blue	0.944789	-0.279808	0.581781	0.0795499	1269.5	1078.65	190.851	887.799	0.0320253	0.909792	-0.847914	6.52437e-05	0.815889	0.000208201	0.581781	0.0228987	0.944789	1.14468e-07	-0.279808	0.312475	0.0795499	0.778087
Bbs1	blue	0.944128	-0.293289	0.610748	0.12925	1243.11	1036.97	206.138	830.836	0.0262876	0.925908	-0.842111	8.20083e-05	0.815823	0.00020865	0.610748	0.0155856	0.944128	1.23477e-07	-0.293289	0.288729	0.12925	0.646171
Zdhhc18	blue	0.968124	-0.333136	0.575181	0.0783251	1362.41	1182.37	180.04	1002.33	0.0746191	0.791553	-0.890315	8.67357e-06	0.815696	0.000209519	0.575181	0.0248802	0.968124	3.4089e-09	-0.333136	0.225001	0.0783251	0.781426
9130213A22Rik	blue	0.674316	0.108935	0.779043	0.21567	744.076	295.048	449.028	-153.98	-0.331936	0.226779	-0.48374	0.0677035	0.815676	0.000209655	0.779043	0.000619481	0.674316	0.00583187	0.108935	0.699159	0.21567	0.44013
Mum1	blue	0.945469	-0.298596	0.608673	0.175771	1244.85	1043.64	201.215	842.422	0.0352157	0.900844	-0.850874	5.78517e-05	0.815658	0.000209777	0.608673	0.0160397	0.945469	1.0579e-07	-0.298596	0.279682	0.175771	0.530915
Scn1b	blue	0.963457	-0.319872	0.565123	0.0504049	1352.52	1175.13	177.386	997.746	0.0597158	0.832574	-0.874811	1.97061e-05	0.815095	0.00021367	0.565123	0.0281468	0.963457	8.1928e-09	-0.319872	0.245138	0.0504049	0.858414
Katnb1	blue	0.97746	-0.343208	0.577694	0.114134	1415.4	1234.55	180.849	1053.7	0.0722024	0.798173	-0.887149	1.03537e-05	0.814947	0.000214704	0.577694	0.0241111	0.97746	3.66479e-10	-0.343208	0.210427	0.114134	0.685465
Dbndd2	blue	0.968789	-0.325035	0.57002	0.0268793	1386.47	1203.86	182.606	1021.25	0.0649611	0.818085	-0.879707	1.53921e-05	0.814746	0.00021611	0.57002	0.0265181	0.968789	2.97719e-09	-0.325035	0.237171	0.0268793	0.924245
Trpm4	blue	0.635649	0.13161	0.696358	-0.0466027	563.477	256.813	306.664	-49.8506	-0.335516	0.221501	-0.478735	0.0710202	0.814252	0.000219608	0.696358	0.00392634	0.635649	0.0108715	0.13161	0.640109	-0.0466027	0.869006
Bcl2l2	blue	0.958638	-0.309284	0.594353	0.0280603	1311.05	1120.49	190.556	929.937	0.0459274	0.870889	-0.860158	3.89996e-05	0.81423	0.000219759	0.594353	0.0194595	0.958638	1.81158e-08	-0.309284	0.261984	0.0280603	0.920926
Fam189b	blue	0.961049	-0.3123	0.577563	0.0847209	1332.61	1150.43	182.184	968.246	0.0539713	0.848499	-0.868198	2.70837e-05	0.814226	0.000219789	0.577563	0.0241505	0.961049	1.23326e-08	-0.3123	0.257115	0.0847209	0.764027
Dnajc9	blue	0.983482	-0.348165	0.567766	0.119225	1461.17	1284.14	177.031	1107.1	0.0844005	0.764897	-0.898199	5.44691e-06	0.813799	0.000222854	0.567766	0.0272584	0.983482	4.92963e-11	-0.348165	0.20348	0.119225	0.67214
Fam83g	blue	0.97154	-0.342832	0.55478	0.00918813	1386.88	1216.57	170.309	1046.26	0.0829109	0.768941	-0.896029	6.21387e-06	0.813118	0.000227805	0.55478	0.0318336	0.97154	1.64524e-09	-0.342832	0.21096	0.00918813	0.974074
Snx1	blue	0.969724	-0.315403	0.589597	0.0817762	1388.81	1196.91	191.9	1005.01	0.0536715	0.849332	-0.866779	2.89314e-05	0.813108	0.000227877	0.589597	0.0207103	0.969724	2.44893e-09	-0.315403	0.252165	0.0817762	0.772026
Cln6	blue	0.872651	-0.155243	0.684991	0.227742	1036.99	750.443	286.544	463.9	-0.0733432	0.795047	-0.739158	0.00164018	0.812501	0.000232367	0.684991	0.00483458	0.872651	2.19051e-05	-0.155243	0.580632	0.227742	0.414311
Serpinb6c	blue	0.944223	-0.259483	0.620217	0.144127	1290.58	1071.05	219.529	851.524	0.0142874	0.959695	-0.826699	0.000144448	0.812411	0.000233037	0.620217	0.0136371	0.944223	1.22151e-07	-0.259483	0.350343	0.144127	0.608327
Airn	blue	0.918427	-0.272044	0.57554	0.190395	1109.29	928.74	180.547	748.193	0.0210426	0.940664	-0.83307	0.000115091	0.812027	0.00023592	0.57554	0.024769	0.918427	1.35691e-06	-0.272044	0.32665	0.190395	0.496705
Zfhx2	blue	0.74266	-0.0386838	0.671688	-0.190791	593.732	356.557	237.175	119.382	-0.21192	0.448312	-0.599432	0.0181881	0.811352	0.000241067	0.671688	0.0061007	0.74266	0.00151623	-0.0386838	0.89113	-0.190791	0.495793
Bahd1	blue	0.978606	-0.34067	0.570922	0.0903642	1429.29	1251.57	177.724	1073.84	0.0847871	0.763848	-0.895555	6.39262e-06	0.810768	0.000245589	0.570922	0.026226	0.978606	2.61777e-10	-0.34067	0.214041	0.0903642	0.748762
Brd8	blue	0.952934	-0.308266	0.584145	0.180216	1259.27	1081.4	177.869	903.528	0.0413909	0.883558	-0.852129	5.49332e-05	0.810738	0.000245819	0.584145	0.0222191	0.952934	4.13754e-08	-0.308266	0.263638	0.180216	0.520407
Vpreb2	blue	0.784932	-0.075127	0.651718	-0.137192	694.477	466.808	227.669	239.139	-0.15181	0.589129	-0.658518	0.00759861	0.810328	0.000249041	0.651718	0.00847741	0.784932	0.00052776	-0.075127	0.790163	-0.137192	0.625859
Bin2	blue	0.968769	-0.312557	0.594207	0.188016	1384.59	1191.04	193.557	997.479	0.0564616	0.841588	-0.866344	2.95198e-05	0.809882	0.000252583	0.594207	0.0194969	0.968769	2.9896e-09	-0.312557	0.256703	0.188016	0.502198
Zfp105	blue	0.934005	-0.298527	0.584633	0.123344	1165.78	988.461	177.322	811.139	0.0431162	0.878737	-0.852972	5.30429e-05	0.809856	0.000252791	0.584633	0.0220807	0.934005	3.55554e-07	-0.298527	0.279798	0.123344	0.661426
Cd180	blue	0.777137	-0.0545388	0.683517	0.290366	692.375	443.063	249.313	193.75	-0.173236	0.536952	-0.63652	0.0107296	0.809755	0.000253595	0.683517	0.00496363	0.777137	0.000651787	-0.0545388	0.846924	0.290366	0.293784
Loxl1	blue	0.891788	-0.205511	0.619481	-0.00835341	1035.05	823.261	211.79	611.47	-0.0275372	0.922396	-0.781305	0.000582828	0.808842	0.000260998	0.619481	0.0137813	0.891788	7.97312e-06	-0.205511	0.462468	-0.00835341	0.976429
Cysltr2	blue	0.708358	0.080983	0.739146	-0.080823	712.524	370.06	342.465	27.595	-0.292386	0.290284	-0.515821	0.049044	0.808207	0.000266248	0.739146	0.0016406	0.708358	0.00312043	0.080983	0.774184	-0.080823	0.774619
Pira2	blue	0.920759	-0.224368	0.625801	0.0912362	1174.51	956.366	218.145	738.221	-0.012684	0.964216	-0.795377	0.000392359	0.808061	0.000267473	0.625801	0.0125798	0.920759	1.13021e-06	-0.224368	0.421447	0.0912362	0.74641
Oraov1	blue	0.971169	-0.349367	0.568356	0.0520366	1359.62	1190.68	168.939	1021.74	0.0873073	0.75702	-0.895003	6.60622e-06	0.807696	0.000270538	0.568356	0.0270633	0.971169	1.788e-09	-0.349367	0.201817	0.0520366	0.853875
Cdc42ep5	blue	0.942041	-0.297056	0.596282	0.108533	1206.46	1018	188.454	829.547	0.0445243	0.874805	-0.85212	5.49535e-05	0.807596	0.000271384	0.596282	0.0189688	0.942041	1.55925e-07	-0.297056	0.282289	0.108533	0.700223
Fam129b	blue	0.970219	-0.330376	0.567925	0.0486494	1372.12	1197.83	174.293	1023.54	0.0666968	0.813303	-0.874215	2.02932e-05	0.807518	0.000272042	0.567925	0.0272058	0.970219	2.20267e-09	-0.330376	0.229103	0.0486494	0.863302
Bicc1	blue	0.976636	-0.341192	0.572987	0.0916985	1407.65	1232.16	175.498	1056.66	0.0787864	0.780168	-0.886055	1.09942e-05	0.807268	0.000274172	0.572987	0.0255667	0.976636	4.61871e-10	-0.341192	0.213295	0.0916985	0.745165
Pdzd4	blue	0.908831	-0.286858	0.570756	0.0483386	1018.03	857.916	160.109	697.807	0.0286869	0.919165	-0.835701	0.000104498	0.807014	0.000276349	0.570756	0.0262797	0.908831	2.73035e-06	-0.286858	0.29992	0.0483386	0.864167
Faim3	blue	0.725134	0.0502977	0.71277	0.184107	688.554	383.083	305.471	77.6122	-0.258315	0.352593	-0.548692	0.0341672	0.807007	0.000276408	0.71277	0.00285979	0.725134	0.0022208	0.0502977	0.858712	0.184107	0.511287
Mthfsd	blue	0.965496	-0.335065	0.57559	0.101589	1331.87	1157.93	173.944	983.983	0.0774588	0.783791	-0.883881	1.23639e-05	0.806422	0.000281479	0.57559	0.0247537	0.965496	5.66935e-09	-0.335065	0.222162	0.101589	0.718659
Stoml1	blue	0.951362	-0.304925	0.581145	0.137008	1248.33	1073.07	175.263	897.807	0.040312	0.886575	-0.846676	6.85589e-05	0.806364	0.000281982	0.581145	0.0230843	0.951362	5.10298e-08	-0.304925	0.269117	0.137008	0.626328
St3gal2	blue	0.962345	-0.323822	0.578406	0.123788	1318.29	1140.96	177.333	963.623	0.0595903	0.832922	-0.865866	3.01766e-05	0.806275	0.00028276	0.578406	0.0238963	0.962345	9.92825e-09	-0.323822	0.239028	0.123788	0.660276
Tmem41a	blue	0.94087	-0.332104	0.554062	-0.0208334	1166.96	1011.86	155.102	856.76	0.0689515	0.807099	-0.875046	1.94784e-05	0.806094	0.000284349	0.554062	0.0321025	0.94087	1.77075e-07	-0.332104	0.22653	-0.0208334	0.941253
Gm3325	blue	0.82127	-0.135104	0.646513	0.0470035	748.059	538.04	210.019	328.02	-0.108697	0.699789	-0.697351	0.00385401	0.806048	0.000284758	0.646513	0.00920247	0.82127	0.000174078	-0.135104	0.631177	0.0470035	0.867889
Fam178a	blue	0.83685	-0.179152	0.629798	-0.0497816	774.446	574.496	199.951	374.545	-0.0629434	0.823653	-0.742652	0.00151651	0.805595	0.000288765	0.629798	0.0118631	0.83685	0.000100131	-0.179152	0.522915	-0.0497816	0.860149
Bend5	blue	0.856321	-0.166095	0.619972	0.132452	856.407	660.312	196.095	464.217	-0.0668101	0.812991	-0.738755	0.00165495	0.805565	0.000289037	0.619972	0.013685	0.856321	4.60527e-05	-0.166095	0.554112	0.132452	0.637952
Clstn1	blue	0.836556	-0.145793	0.639819	-0.0604156	794.266	586.728	207.538	379.19	-0.0918614	0.744726	-0.712999	0.00284676	0.80486	0.000295374	0.639819	0.010205	0.836556	0.000101235	-0.145793	0.604144	-0.0604156	0.830638
Gnat2	blue	0.836133	-0.169428	0.619521	0.123528	777.521	587.522	189.999	397.523	-0.0874161	0.756726	-0.717185	0.00261667	0.804601	0.000297734	0.619521	0.0137734	0.836133	0.000102839	-0.169428	0.546074	0.123528	0.660949
Wipf3	blue	-0.890401	0.247282	-0.576329	0.00545231	989.685	808.271	181.414	626.856	-0.00741722	0.97907	0.811878	0.000237049	-0.804461	0.000299018	-0.576329	0.0245265	-0.890401	8.63133e-06	0.247282	0.374247	0.00545231	0.984614
Tm6sf1	blue	0.907846	-0.217649	0.61753	0.101033	1113.85	902.665	211.186	691.479	-0.0181747	0.948741	-0.78611	0.000510808	0.804285	0.000300635	0.61753	0.0141697	0.907846	2.92071e-06	-0.217649	0.435842	0.101033	0.720142
Leng9	blue	0.956197	-0.334182	0.546985	-0.0088813	1270.13	1112.44	157.697	954.738	0.0759645	0.787873	-0.880046	1.51251e-05	0.804082	0.000302511	0.546985	0.034844	0.956197	2.61444e-08	-0.334182	0.223459	-0.0088813	0.97494
Leprel4	blue	0.986664	-0.363057	0.561324	0.0759187	1462.55	1294.16	168.394	1125.77	0.0999133	0.723129	-0.902671	4.11286e-06	0.802758	0.000314966	0.561324	0.0294614	0.986664	1.23626e-11	-0.363057	0.183499	0.0759187	0.787998
Rrm2	blue	0.887322	-0.242557	0.577538	-0.0307954	926.691	759.218	167.472	591.746	-0.0125075	0.964713	-0.789899	0.000459285	0.802407	0.000318343	0.577538	0.0241581	0.887322	1.02555e-05	-0.242557	0.383736	-0.0307954	0.913244
Lyl1	blue	0.981565	-0.350321	0.566175	0.0790539	1436.37	1264.07	172.3	1091.77	0.0918735	0.744693	-0.894238	6.9125e-06	0.802364	0.000318753	0.566175	0.0277907	0.981565	1.00213e-10	-0.350321	0.200505	0.0790539	0.779439
Prkar1b	blue	0.783528	-0.0215409	0.705391	0.161593	782.3	492.489	289.811	202.678	-0.186972	0.504618	-0.615038	0.0146777	0.802011	0.000322184	0.705391	0.00330613	0.783528	0.000548551	-0.0215409	0.939262	0.161593	0.565052
Kif3a	blue	0.964692	-0.33135	0.583271	0.103152	1326.92	1146.7	180.221	966.482	0.0738408	0.793684	-0.875742	1.88168e-05	0.801901	0.000323254	0.583271	0.0224686	0.964692	6.57171e-09	-0.33135	0.22765	0.103152	0.714495
Larp6	blue	0.874612	-0.180642	0.660012	-0.0285256	986.65	735.668	250.982	484.686	-0.0608794	0.829355	-0.74064	0.00158675	0.80152	0.000326995	0.660012	0.00741541	0.874612	1.99006e-05	-0.180642	0.519404	-0.0285256	0.919619
Pkn3	blue	0.955491	-0.321202	0.551177	-0.0244737	1270.54	1110.77	159.775	950.991	0.0680895	0.809469	-0.8696	2.53532e-05	0.801511	0.000327084	0.551177	0.0331998	0.955491	2.89569e-08	-0.321202	0.24307	-0.0244737	0.931009
Sike1	blue	0.985772	-0.372472	0.547767	0.0959448	1447.2	1288.44	158.762	1129.68	0.111648	0.692001	-0.912717	2.07686e-06	0.801069	0.000331466	0.547767	0.0345325	0.985772	1.87931e-11	-0.372472	0.171552	0.0959448	0.73375
Prcp	blue	0.941727	-0.276262	0.597578	0.0432158	1227.04	1036.45	190.582	845.872	0.0397356	0.888187	-0.84074	8.64462e-05	0.801004	0.000332111	0.597578	0.0186445	0.941727	1.61372e-07	-0.276262	0.318905	0.0432158	0.878459
5830428M24Rik	blue	0.677438	0.0692171	0.695909	0.118164	557.238	289.004	268.235	20.7686	-0.290984	0.29271	-0.509805	0.0522139	0.800789	0.000334266	0.695909	0.00395945	0.677438	0.00552481	0.0692171	0.806369	0.118164	0.674909
Gpr153	blue	0.938975	-0.302675	0.554866	0.0920034	1193.34	1030.35	162.995	867.354	0.0564202	0.841703	-0.85707	4.46003e-05	0.800649	0.000335674	0.554866	0.0318018	0.938975	2.16369e-07	-0.302675	0.272844	0.0920034	0.744343
Tmem199	blue	0.963778	-0.349506	0.543576	0.0354477	1309.23	1154.49	154.742	999.747	0.0930521	0.74152	-0.893574	7.18751e-06	0.800522	0.00033696	0.543576	0.0362252	0.963778	7.74247e-09	-0.349506	0.201626	0.0354477	0.900194
Eid1	blue	0.933411	-0.298529	0.578333	-0.0325378	1160.19	986.881	173.311	813.569	0.0492379	0.861663	-0.849588	6.09743e-05	0.80035	0.000338703	0.578333	0.0239183	0.933411	3.76345e-07	-0.298529	0.279795	-0.0325378	0.908354
Atxn7l3	blue	0.980454	-0.354791	0.563527	0.0917531	1416.9	1250.42	166.478	1083.94	0.098332	0.727355	-0.89835	5.39666e-06	0.800018	0.000342086	0.563527	0.0286934	0.980454	1.4617e-10	-0.354791	0.194425	0.0917531	0.745017
Rassf4	blue	0.880928	-0.179983	0.638918	0.076447	982.984	761.044	221.94	539.103	-0.0353645	0.900427	-0.764014	0.00091347	0.799379	0.000348678	0.638918	0.0103462	0.880928	1.44485e-05	-0.179983	0.520955	0.076447	0.786554
Dtx3	blue	0.916916	-0.245135	0.613277	0.0806271	1107.26	908.145	199.116	709.029	-0.0105939	0.97011	-0.788525	0.000477459	0.799119	0.00035139	0.613277	0.0150454	0.916916	1.52317e-06	-0.245135	0.378541	0.0806271	0.775153
Fmnl3	blue	0.947943	-0.299148	0.575456	0.170055	1238.22	1065.76	172.458	893.3	0.0477263	0.865874	-0.846641	6.8655e-05	0.798915	0.00035353	0.575456	0.024795	0.947943	7.87061e-08	-0.299148	0.278751	0.170055	0.544566
H2-DMa	blue	0.802225	-0.0563455	0.674562	0.200743	817.36	557.835	259.525	298.311	-0.15966	0.569775	-0.639141	0.0103112	0.798801	0.000354725	0.674562	0.00580723	0.802225	0.000320101	-0.0563455	0.84191	0.200743	0.473141
Ccdc126	blue	0.962983	-0.343917	0.551773	0.00600224	1306.67	1146	160.671	985.327	0.0857101	0.761345	-0.884506	1.19563e-05	0.798796	0.000354784	0.551773	0.0329709	0.962983	8.89942e-09	-0.343917	0.209424	0.00600224	0.983062
Arhgef7	blue	0.84716	-0.159638	0.64407	-0.0591425	843.093	622.821	220.273	402.548	-0.0896674	0.750642	-0.708829	0.00309176	0.798496	0.00035795	0.64407	0.00955895	0.84716	6.72461e-05	-0.159638	0.569829	-0.0591425	0.834161
Spice1	blue	0.964866	-0.333054	0.575449	0.13379	1317.81	1146.66	171.153	975.506	0.0718818	0.799053	-0.870222	2.46159e-05	0.79834	0.000359609	0.575449	0.0247973	0.964866	6.36661e-09	-0.333054	0.225123	0.13379	0.634531
Phlpp2	blue	0.853927	-0.221292	0.586822	0.239593	773.672	616	157.672	458.327	-0.0249699	0.929614	-0.772961	0.000727399	0.797931	0.000363993	0.586822	0.0214683	0.853927	5.09651e-05	-0.221292	0.428006	0.239593	0.389752
Rsph3a	blue	0.872864	-0.245164	0.547595	0.0141243	885.182	729.738	155.444	574.295	0.00202083	0.994297	-0.799939	0.000342899	0.797918	0.000364138	0.547595	0.0346009	0.872864	2.16794e-05	-0.245164	0.378483	0.0141243	0.960155
2210009G21Rik	blue	0.935754	-0.316329	0.543016	-0.0632225	1160.61	1003.9	156.702	847.203	0.068686	0.807829	-0.866566	2.92189e-05	0.79788	0.00036455	0.543016	0.0364561	0.935754	2.99894e-07	-0.316329	0.250699	-0.0632225	0.822882
Slc10a3	blue	0.971957	-0.358396	0.542106	0.0438144	1367.02	1210.82	156.194	1054.63	0.104271	0.711521	-0.902138	4.25596e-06	0.797867	0.00036468	0.542106	0.0368333	0.971957	1.49617e-09	-0.358396	0.18961	0.0438144	0.876787
Tceal5	blue	0.688514	0.0156329	0.665385	-0.0315584	483.652	268.403	215.248	53.155	-0.259888	0.349565	-0.53776	0.0386764	0.797647	0.000367061	0.665385	0.00678532	0.688514	0.00453692	0.0156329	0.955903	-0.0315584	0.911102
Ttc12	blue	0.755609	-0.0405143	0.695474	0.098582	681.136	396.612	284.524	112.089	-0.207913	0.457137	-0.589711	0.0206797	0.797624	0.000367318	0.695474	0.00399173	0.755609	0.00112173	-0.0405143	0.886009	0.098582	0.726687
Ggt7	blue	0.731158	0.00891234	0.690052	0.324387	627.116	366.14	260.976	105.164	-0.210067	0.452383	-0.587078	0.0213974	0.797145	0.000372544	0.690052	0.00441165	0.731158	0.00195401	0.00891234	0.974852	0.324387	0.238162
Wt1	blue	0.929105	-0.290513	0.58084	-0.0609212	1118.79	947.641	171.149	776.492	0.0316199	0.91093	-0.828441	0.000135868	0.796821	0.000376103	0.58084	0.0231737	0.929105	5.59628e-07	-0.290513	0.293529	-0.0609212	0.82924
Rabl2	blue	0.983455	-0.362651	0.555391	0.133191	1434.92	1273.2	161.713	1111.49	0.106559	0.705448	-0.902974	4.03355e-06	0.796415	0.000380623	0.555391	0.0316064	0.983455	4.98253e-11	-0.362651	0.184027	0.133191	0.636062
Zfp9	blue	0.755406	-0.0995039	0.587329	0.0870636	581.785	400.839	180.946	219.893	-0.133101	0.636291	-0.662898	0.00707149	0.795999	0.000385283	0.587329	0.0213282	0.755406	0.00112719	-0.0995039	0.724222	0.0870636	0.75768
2018-09-08	blue	0.973512	-0.355352	0.554606	0.00841951	1356.23	1197.96	158.269	1039.7	0.0921624	0.743915	-0.888053	9.84878e-06	0.79589	0.000386514	0.554606	0.0318988	0.973512	1.03644e-09	-0.355352	0.19367	0.00841951	0.976243
Slamf9	blue	0.933479	-0.283721	0.577764	0.0952468	1158.06	986.902	171.16	815.742	0.0396781	0.888348	-0.835335	0.00010592	0.795657	0.000389157	0.577764	0.0240899	0.933479	3.73922e-07	-0.283721	0.30547	0.0952468	0.735623
Pdxp	blue	0.834352	-0.126864	0.674896	-0.0938364	855.679	596.385	259.295	337.09	-0.111189	0.693211	-0.684462	0.00488056	0.795651	0.000389228	0.674896	0.00577382	0.834352	0.000109822	-0.126864	0.652318	-0.0938364	0.739411
Maged2	blue	0.932098	-0.270136	0.577886	0.127467	1177.84	1001.16	176.679	824.478	0.0261602	0.926267	-0.821318	0.000173798	0.795158	0.000394873	0.577886	0.0240531	0.932098	4.25894e-07	-0.270136	0.330189	0.127467	0.650762
Rap2b	blue	0.849042	-0.14982	0.628118	0.0261321	867.427	659.718	207.709	452.009	-0.0822153	0.770832	-0.712919	0.00285133	0.795134	0.000395144	0.628118	0.0121603	0.849042	6.23412e-05	-0.14982	0.594079	0.0261321	0.926346
Wtip	blue	0.967522	-0.33864	0.550071	0.109775	1343.92	1184.79	159.124	1025.67	0.0846973	0.764091	-0.879537	1.55279e-05	0.79484	0.000398546	0.550071	0.0336277	0.967522	3.84405e-09	-0.33864	0.21696	0.109775	0.69694
Hoxb2	blue	0.917479	-0.244873	0.621443	0.114022	1112.23	905.838	206.396	699.443	0.00518201	0.985377	-0.799979	0.000342484	0.794797	0.000399039	0.621443	0.0133992	0.917479	1.4593e-06	-0.244873	0.379067	0.114022	0.685758
Arhgap20	blue	0.705379	0.00667159	0.667655	-0.0874368	510.7	297.942	212.759	85.183	-0.245897	0.377015	-0.548707	0.0341613	0.794604	0.00040129	0.667655	0.00653217	0.705379	0.00330696	0.00667159	0.981174	-0.0874368	0.75667
Lrrfip1	blue	0.958041	-0.309268	0.577232	0.156637	1304.47	1128.68	175.788	952.89	0.0598499	0.832203	-0.854254	5.02711e-05	0.794404	0.000403623	0.577232	0.0242511	0.958041	1.98566e-08	-0.309268	0.262009	0.156637	0.577198
Eya2	blue	0.938326	-0.307216	0.563401	0.247863	1168.87	1006.28	162.585	843.697	0.0592802	0.83378	-0.852943	5.31062e-05	0.793663	0.000412376	0.563401	0.0287369	0.938326	2.31382e-07	-0.307216	0.265353	0.247863	0.373089
Tmem26	blue	-0.803561	0.16444	-0.605409	0.0547436	640.287	468.82	171.467	297.353	0.0878939	0.755434	0.705761	0.00328253	-0.793655	0.000412475	-0.605409	0.0167749	-0.803561	0.000307364	0.16444	0.558123	0.0547436	0.846355
Ehbp1l1	blue	0.977216	-0.364901	0.536075	0.0830877	1390.8	1240.29	150.502	1089.79	0.108671	0.699858	-0.902102	4.26568e-06	0.793432	0.000415145	0.536075	0.0394086	0.977216	3.92834e-10	-0.364901	0.181117	0.0830877	0.768461
Pask	blue	0.988097	-0.385051	0.541435	0.112047	1448.89	1297.22	151.671	1145.55	0.124295	0.658962	-0.917387	1.46961e-06	0.793092	0.000419234	0.541435	0.0371136	0.988097	5.92666e-12	-0.385051	0.156403	0.112047	0.69095
Lrrc25	blue	0.775249	-0.0278301	0.674002	0.0820534	755.395	495.7	259.695	236.005	-0.177827	0.526042	-0.61488	0.0147106	0.792707	0.000423904	0.674002	0.00586349	0.775249	0.00068514	-0.0278301	0.921573	0.0820534	0.771272
Fam178b	blue	0.690363	0.0784223	0.765655	0.22531	730.987	312.966	418.021	-105.054	-0.293402	0.288534	-0.499198	0.0581651	0.7926	0.000425208	0.765655	0.000876735	0.690363	0.00438663	0.0784223	0.781161	0.22531	0.419448
Eps8	blue	0.959784	-0.334781	0.552913	0.060099	1290.31	1132.9	157.406	975.493	0.0845599	0.764464	-0.876898	1.77583e-05	0.792339	0.000428417	0.552913	0.0325361	0.959784	1.51348e-08	-0.334781	0.222578	0.060099	0.831514
Slc11a1	blue	0.852269	-0.139485	0.633156	0.15854	917.988	697.523	220.464	477.059	-0.0773189	0.784173	-0.714888	0.00274104	0.792206	0.000430044	0.633156	0.0112857	0.852269	5.46159e-05	-0.139485	0.620042	0.15854	0.572522
Nradd	blue	0.900269	-0.256997	0.599924	0.18718	984.389	804.986	179.403	625.583	-0.00925127	0.973896	-0.782868	0.000558553	0.792119	0.000431122	0.599924	0.0180684	0.900269	4.79074e-06	-0.256997	0.355143	0.18718	0.504137
Anxa3	blue	0.873173	-0.186627	0.624025	0.346166	941.362	737.541	203.821	533.72	-0.0460478	0.870554	-0.745476	0.00142215	0.791524	0.000438532	0.624025	0.012909	0.873173	2.13556e-05	-0.186627	0.505419	0.346166	0.206262
Efemp2	blue	0.959028	-0.340844	0.535065	0.0924777	1278.34	1130.68	147.654	983.028	0.084523	0.764564	-0.875921	1.8649e-05	0.791398	0.000440106	0.535065	0.0398528	0.959028	1.705e-08	-0.340844	0.213792	0.0924777	0.743066
Lgals6	blue	0.826859	-0.148273	0.650244	0.258516	769.145	552.754	216.391	336.363	-0.0916688	0.745245	-0.699571	0.003696	0.79124	0.000442105	0.650244	0.00867806	0.826859	0.000143639	-0.148273	0.597938	0.258516	0.352205
Wnt9a	blue	0.940719	-0.337229	0.543096	0.0341125	1143.66	1001.84	141.822	860.017	0.0785887	0.780707	-0.869632	2.53148e-05	0.791044	0.000444583	0.543096	0.0364231	0.940719	1.79955e-07	-0.337229	0.219004	0.0341125	0.903937
Mdc1	blue	0.915253	-0.299463	0.572077	0.18891	1015.08	860.86	154.218	706.642	0.0327257	0.907827	-0.823698	0.000160264	0.790972	0.000445489	0.572077	0.0258557	0.915253	1.72538e-06	-0.299463	0.27822	0.18891	0.500131
Cenpn	blue	0.723608	-0.0178215	0.686114	-0.110868	571.394	328.818	242.576	86.2428	-0.216659	0.437984	-0.574204	0.0251841	0.790863	0.000446877	0.686114	0.00473808	0.723608	0.00229279	-0.0178215	0.949736	-0.110868	0.694058
Fbxo27	blue	0.690302	0.0501443	0.71223	0.336076	586.518	302.496	284.022	18.4734	-0.243655	0.381519	-0.547041	0.0348215	0.790696	0.000449009	0.71223	0.00289072	0.690302	0.00439153	0.0501443	0.859139	0.336076	0.220683
Mthfr	blue	0.974201	-0.351354	0.568252	0.143008	1369.08	1202.52	166.556	1035.96	0.0984893	0.726935	-0.889135	9.27103e-06	0.790646	0.000449649	0.568252	0.0270977	0.974201	8.74727e-10	-0.351354	0.199088	0.143008	0.611141
Fcrla	blue	0.860437	-0.166545	0.615256	0.116121	908.651	705.561	203.09	502.471	-0.0620774	0.826044	-0.7285	0.00206835	0.790577	0.000450526	0.615256	0.0146328	0.860437	3.85228e-05	-0.166545	0.553023	0.116121	0.680252
D4Ertd617e	blue	0.82829	-0.124525	0.68033	0.0503302	857.495	586.911	270.584	316.326	-0.110024	0.696282	-0.680444	0.00524134	0.790469	0.00045192	0.68033	0.00525188	0.82829	0.000136594	-0.124525	0.658366	0.0503302	0.858622
Aplnr	blue	0.845639	-0.160152	0.669062	0.176567	888.376	627.568	260.808	366.76	-0.0743333	0.792335	-0.716135	0.00267296	0.790468	0.000451931	0.669062	0.00637895	0.845639	7.14422e-05	-0.160152	0.568571	0.176567	0.529027
Lfng	blue	0.933389	-0.309871	0.568779	0.0820482	1118.58	962.365	156.212	806.153	0.05951	0.833144	-0.849584	6.09849e-05	0.790074	0.00045702	0.568779	0.026924	0.933389	3.77124e-07	-0.309871	0.261031	0.0820482	0.771286
S1pr4	blue	0.881855	-0.207187	0.634481	0.131268	956.665	747.386	209.279	538.107	-0.0287854	0.918889	-0.761256	0.000978023	0.790042	0.000457435	0.634481	0.011064	0.881855	1.3765e-05	-0.207187	0.458746	0.131268	0.640986
Cc2d1b	blue	0.985434	-0.393031	0.523705	0.0804999	1425.28	1282.97	142.309	1140.66	0.129375	0.645848	-0.919152	1.28264e-06	0.789777	0.000460878	0.523705	0.0451077	0.985434	2.18748e-11	-0.393031	0.147272	0.0804999	0.775499
Tspan3	blue	0.962551	-0.327791	0.554522	0.0403562	1315.12	1153.86	161.257	992.602	0.0813406	0.773211	-0.871012	2.37055e-05	0.789671	0.000462259	0.554522	0.0319301	0.962551	9.58624e-09	-0.327791	0.232987	0.0403562	0.886451
Tspyl3	blue	0.931805	-0.29223	0.582198	0.209567	1129.3	962.394	166.901	795.493	0.0393102	0.889378	-0.828748	0.000134404	0.789437	0.000465327	0.582198	0.0227776	0.931805	4.37663e-07	-0.29223	0.290554	0.209567	0.453482
4833442J19Rik	blue	0.972869	-0.366334	0.541529	0.0873904	1339.86	1192.52	147.34	1045.18	0.109427	0.697859	-0.8988	5.249e-06	0.789373	0.000466175	0.541529	0.0370743	0.972869	1.20964e-09	-0.366334	0.179282	0.0873904	0.756796
Abca7	blue	0.976214	-0.373919	0.533193	0.138173	1359.57	1216.39	143.183	1073.21	0.117656	0.676237	-0.906881	3.11794e-06	0.789224	0.000468136	0.533193	0.0406858	0.976214	5.18438e-10	-0.373919	0.169762	0.138173	0.623368
Plin3	blue	0.936283	-0.321117	0.548132	0.00924615	1115.09	971.82	143.268	828.552	0.0559044	0.843134	-0.845064	7.30827e-05	0.78916	0.000468993	0.548132	0.0343881	0.936283	2.84576e-07	-0.321117	0.243203	0.00924615	0.973911
Cyp3a41b	blue	-0.633034	-0.0770798	-0.673741	-0.17504	424.695	208.089	216.605	-8.51598	0.314472	0.253644	0.474387	0.0739956	-0.788859	0.000472994	-0.673741	0.00588993	-0.633034	0.0113062	-0.0770798	0.784826	-0.17504	0.532653
Arhgap25	blue	0.93895	-0.300937	0.555639	0.0968044	1198.04	1035.57	162.467	873.102	0.064278	0.819969	-0.852208	5.47554e-05	0.78793	0.000485512	0.555639	0.0315142	0.93895	2.16916e-07	-0.300937	0.275745	0.0968044	0.731446
Foxd2	blue	0.891034	-0.244694	0.587037	0.142806	930.617	768.93	161.686	607.244	0.00740864	0.979094	-0.795263	0.000393657	0.787855	0.000486531	0.587037	0.0214088	0.891034	8.32579e-06	-0.244694	0.379427	0.142806	0.611651
Pcyox1l	blue	0.905246	-0.279929	0.573286	0.104093	964.178	814.343	149.835	664.507	0.0272668	0.923156	-0.814013	0.000221314	0.786746	0.00050185	0.573286	0.0254723	0.905246	3.47721e-06	-0.279929	0.312259	0.104093	0.711994
Shroom2	blue	-0.973348	0.37209	-0.533597	-0.11651	1345.45	1201.18	144.272	1056.9	-0.113989	0.685846	0.900569	4.70122e-06	-0.78658	0.000504171	-0.533597	0.0405049	-0.973348	1.07864e-09	0.37209	0.172026	-0.11651	0.679234
1110051M20Rik	blue	0.740884	-0.000400188	0.710458	0.20266	690.131	393.72	296.412	97.3078	-0.231455	0.406532	-0.554727	0.0318534	0.786182	0.000509793	0.710458	0.00299413	0.740884	0.0015781	-0.000400188	0.998871	0.20266	0.468835
Plekho1	blue	0.953706	-0.32494	0.54366	0.0730578	1257.98	1105.32	152.659	952.666	0.0838025	0.76652	-0.86978	2.51381e-05	0.785978	0.000512693	0.54366	0.0361908	0.953706	3.72264e-08	-0.32494	0.237317	0.0730578	0.795829
Exog	blue	0.850393	-0.178355	0.655834	0.177873	881.261	633.809	247.452	386.357	-0.0641075	0.820439	-0.721668	0.00238703	0.785775	0.000515579	0.655834	0.00793653	0.850393	5.90033e-05	-0.178355	0.524796	0.177873	0.525934
Nek2	blue	0.726365	-0.0322079	0.62292	0.0204593	570.228	359.051	211.177	147.874	-0.173709	0.535823	-0.612025	0.0153109	0.785734	0.000516178	0.62292	0.0131169	0.726365	0.00216404	-0.0322079	0.90928	0.0204593	0.942307
B230312A22Rik	blue	0.965204	-0.351549	0.548193	0.0772203	1288.93	1141.15	147.776	993.378	0.0934084	0.740562	-0.879041	1.59285e-05	0.785632	0.000517631	0.548193	0.0343638	0.965204	5.98417e-09	-0.351549	0.198822	0.0772203	0.784442
Efhc1	blue	0.810253	-0.165119	0.61544	0.156191	649.561	482.759	166.802	315.957	-0.0829039	0.76896	-0.702684	0.00348315	0.785588	0.000518261	0.61544	0.014595	0.810253	0.000249637	-0.165119	0.556477	0.156191	0.578295
Khnyn	blue	0.948805	-0.302672	0.577547	0.137548	1224.44	1056.33	168.116	888.211	0.0535386	0.849701	-0.838925	9.26253e-05	0.785386	0.000521167	0.577547	0.0241553	0.948805	7.07565e-08	-0.302672	0.272849	0.137548	0.624956
Gnptab	blue	0.9852	-0.38378	0.531905	0.0413047	1416.01	1273.11	142.905	1130.2	0.123487	0.661054	-0.90862	2.77015e-06	0.785133	0.000524836	0.531905	0.0412664	0.9852	2.42476e-11	-0.38378	0.157893	0.0413047	0.883799
Dlg5	blue	0.986269	-0.384312	0.541915	0.0838665	1422.67	1274.25	148.416	1125.84	0.121878	0.665233	-0.906665	3.16343e-06	0.784788	0.000529867	0.541915	0.0369132	0.986269	1.49332e-11	-0.384312	0.157269	0.0838665	0.766346
C130050O18Rik	blue	0.977803	-0.364519	0.549441	0.137836	1372.53	1221.3	151.23	1070.07	0.106955	0.704399	-0.891639	8.04161e-06	0.784685	0.000531373	0.549441	0.0338736	0.977803	3.32046e-10	-0.364519	0.18161	0.137836	0.624224
Fam86	blue	0.973506	-0.389629	0.518357	0.0282693	1335.73	1200.75	134.986	1065.76	0.128423	0.648299	-0.9131	2.0203e-06	0.784677	0.000531485	0.518357	0.047751	0.973506	1.03793e-09	-0.389629	0.15112	0.0282693	0.920339
Car2	blue	-0.936134	0.361444	-0.521686	-0.137984	1092.46	967.637	124.822	842.815	-0.0918499	0.744757	0.876411	1.81982e-05	-0.784561	0.000533187	-0.521686	0.0460927	-0.936134	2.8882e-07	0.361444	0.185599	-0.137984	0.623848
Gpank1	blue	0.954062	-0.359437	0.525025	0.117876	1226.14	1089.36	136.779	952.577	0.110765	0.694328	-0.895302	6.48989e-06	0.784537	0.000533545	0.525025	0.0444719	0.954062	3.5438e-08	-0.359437	0.188234	0.117876	0.675663
2410066E13Rik	blue	0.80184	-0.0714478	0.696136	0.191782	815.413	530.298	285.115	245.183	-0.139338	0.620413	-0.645134	0.0094023	0.784473	0.000534488	0.696136	0.00394272	0.80184	0.000323845	-0.0714478	0.800243	0.191782	0.493514
Mast4	blue	0.934347	-0.311767	0.537641	-0.0241164	1144.89	997.055	147.839	849.216	0.0703343	0.8033	-0.854475	4.98044e-05	0.784141	0.00053939	0.537641	0.0387277	0.934347	3.44042e-07	-0.311767	0.257971	-0.0241164	0.932014
Slc12a5	blue	0.734864	0.00487112	0.706854	0.494335	642.153	365.01	277.143	87.8677	-0.217548	0.43606	-0.566329	0.0277387	0.783877	0.000543313	0.706854	0.00321351	0.734864	0.00180314	0.00487112	0.986254	0.494335	0.0610529
Ccdc34	blue	0.80379	-0.111713	0.660654	-0.0418529	726.261	495.454	230.807	264.647	-0.132503	0.637821	-0.651043	0.00856884	0.783546	0.000548277	0.660654	0.00733785	0.80379	0.00030522	-0.111713	0.691831	-0.0418529	0.882267
Mllt11	blue	0.954682	-0.355934	0.521124	0.018191	1245.91	1105.71	140.202	965.508	0.104871	0.709926	-0.88836	9.68202e-06	0.783489	0.000549141	0.521124	0.0463697	0.954682	3.24885e-08	-0.355934	0.192889	0.018191	0.948695
Tspan17	blue	0.982944	-0.381716	0.548271	0.1098	1402.74	1250.56	152.177	1098.39	0.122697	0.663104	-0.906114	3.28246e-06	0.783416	0.000550233	0.548271	0.0343332	0.982944	6.06457e-11	-0.381716	0.16033	0.1098	0.696874
Ica1	blue	0.961942	-0.354916	0.538633	0.116402	1276.16	1130.48	145.672	984.812	0.0977976	0.728785	-0.881116	1.43079e-05	0.783318	0.000551709	0.538633	0.0383005	0.961942	1.06298e-08	-0.354916	0.194256	0.116402	0.679517
Ostm1	blue	0.978051	-0.398097	0.50933	0.0552348	1365.82	1234.62	131.204	1103.41	0.138257	0.623154	-0.921252	1.08657e-06	0.782995	0.000556615	0.50933	0.0524706	0.978051	3.08815e-10	-0.398097	0.141664	0.0552348	0.844992
Mbd4	blue	0.947104	-0.323051	0.569365	0.0657345	1192.58	1033.78	158.796	874.988	0.0779927	0.782333	-0.860942	3.76736e-05	0.78295	0.000557305	0.569365	0.0267317	0.947104	8.71402e-08	-0.323051	0.240213	0.0657345	0.815954
Serp2	blue	0.804847	-0.117727	0.629287	-0.0242919	701.06	507.141	193.92	313.221	-0.106781	0.704859	-0.675523	0.00571166	0.782304	0.000567214	0.629287	0.0119529	0.804847	0.000295494	-0.117727	0.67605	-0.0242919	0.931521
Eml1	blue	0.978401	-0.35851	0.555221	0.121481	1384.49	1227.71	156.781	1070.93	0.104442	0.711065	-0.886721	1.06002e-05	0.782279	0.000567595	0.555221	0.0316696	0.978401	2.78414e-10	-0.35851	0.189459	0.121481	0.666266
Il27ra	blue	0.72731	0.0246288	0.710993	0.525124	647.805	361.765	286.04	75.7242	-0.22711	0.415642	-0.555006	0.0317495	0.782116	0.000570128	0.710993	0.00296261	0.72731	0.00212124	0.0246288	0.930573	0.525124	0.0444243
Tyrobp	blue	0.803126	-0.0877194	0.643461	0.132791	764.951	545.202	219.75	325.452	-0.122404	0.663865	-0.659676	0.00745638	0.78208	0.000570687	0.643461	0.00964946	0.803126	0.000311459	-0.0877194	0.755906	0.132791	0.637085
Epdr1	blue	0.905562	-0.269043	0.576842	0.118224	974.837	821.218	153.619	667.599	0.00969798	0.972636	-0.791484	0.000439033	0.781786	0.000575269	0.576842	0.0243697	0.905562	3.40512e-06	-0.269043	0.332226	0.118224	0.674754
Pus3	blue	0.980472	-0.392092	0.530767	0.102715	1377.47	1237.06	140.406	1096.66	0.134382	0.633018	-0.915915	1.64238e-06	0.781533	0.000579238	0.530767	0.0417841	0.980472	1.45304e-10	-0.392092	0.148328	0.102715	0.715659
Lasp1	blue	0.948032	-0.370631	0.505976	-0.0228617	1186.83	1060.15	126.687	933.458	0.115366	0.682232	-0.896701	5.96733e-06	0.781335	0.000582359	0.505976	0.0543082	0.948032	7.78481e-08	-0.370631	0.173847	-0.0228617	0.935545
5430435G22Rik	blue	0.962756	-0.365807	0.517766	0.0527382	1285.99	1149.46	136.53	1012.93	0.115344	0.68229	-0.896529	6.02956e-06	0.781185	0.000584728	0.517766	0.0480502	0.962756	9.25366e-09	-0.365807	0.179955	0.0527382	0.851925
4933406B17Rik	blue	-0.706406	0.0366981	-0.584637	-0.0886417	467.678	301.822	165.856	135.965	0.192027	0.492951	0.589039	0.020861	-0.781067	0.000586602	-0.584637	0.0220796	-0.706406	0.00324166	0.0366981	0.89669	-0.0886417	0.753412
Rnf219	blue	0.848969	-0.214438	0.582294	0.0656372	772.063	613.897	158.165	455.732	-0.0121176	0.965812	-0.768931	0.000806973	0.781049	0.000586889	0.582294	0.0227499	0.848969	6.25247e-05	-0.214438	0.44281	0.0656372	0.816222
Mettl4	blue	0.975684	-0.374283	0.545606	0.0915458	1347.41	1199.81	147.602	1052.21	0.112331	0.690203	-0.892555	7.62726e-06	0.780224	0.000600113	0.545606	0.0353979	0.975684	5.97463e-10	-0.374283	0.169313	0.0915458	0.745576
LOC100046496	blue	0.701395	0.0302807	0.697051	0.299441	536.553	289.055	247.498	41.5567	-0.235558	0.398026	-0.54454	0.0358307	0.780097	0.000602167	0.697051	0.00387572	0.701395	0.0035701	0.0302807	0.914689	0.299441	0.278256
B130055M24Rik	blue	0.914245	-0.316803	0.50795	0.00430323	1026.96	896.658	130.299	766.359	0.0699248	0.804424	-0.849452	6.13126e-05	0.779527	0.000611484	0.50795	0.0532212	0.914245	1.8587e-06	-0.316803	0.249949	0.00430323	0.987856
Cyp21a1	blue	0.804117	-0.112161	0.634859	0.349457	670.361	483.652	186.709	296.942	-0.122248	0.66427	-0.656823	0.00781067	0.779071	0.000619015	0.634859	0.0110014	0.804117	0.000302184	-0.112161	0.690652	0.349457	0.201693
Smpd3	blue	0.898156	-0.294321	0.562855	0.048808	919.463	777.803	141.66	636.143	0.0233503	0.93417	-0.802113	0.000321188	0.778763	0.000624147	0.562855	0.028926	0.898156	5.46134e-06	-0.294321	0.286956	0.048808	0.86286
5830405M20Rik	blue	0.800254	-0.145925	0.611156	-0.245103	631.911	463.593	168.317	295.276	-0.0770858	0.784809	-0.701588	0.00355698	0.778673	0.000625639	0.611156	0.0154974	0.800254	0.000339679	-0.145925	0.603811	-0.245103	0.378606
Phf19	blue	0.682119	0.0755185	0.752663	0.213876	686.718	302.163	384.556	-82.3928	-0.286858	0.299919	-0.491488	0.0627913	0.778346	0.000631135	0.752663	0.0012032	0.682119	0.00508845	0.0755185	0.789092	0.213876	0.444034
Zfp142	blue	0.909087	-0.266553	0.555901	0.103548	1042.57	885.792	156.774	729.018	0.0381906	0.892511	-0.816231	0.00020588	0.77804	0.00063631	0.555901	0.0314174	0.909087	2.68259e-06	-0.266553	0.336893	0.103548	0.713441
Selm	blue	0.984858	-0.383595	0.539421	0.122041	1410.86	1265.45	145.415	1120.03	0.127812	0.649874	-0.905848	3.34109e-06	0.778037	0.000636377	0.539421	0.0379638	0.984858	2.81114e-11	-0.383595	0.15811	0.122041	0.664808
Cd79b	blue	0.747887	-0.0095995	0.666655	0.219372	654.81	413.481	241.33	172.151	-0.193501	0.489575	-0.58416	0.0222149	0.777661	0.000642784	0.666655	0.00664271	0.747887	0.00134538	-0.0095995	0.972914	0.219372	0.432128
Gm6658	blue	0.834825	-0.209844	0.59798	0.0637246	699.033	545.212	153.82	391.392	-0.0339305	0.904447	-0.743273	0.00149534	0.777204	0.000650644	0.59798	0.0185449	0.834825	0.00010793	-0.209844	0.452874	0.0637246	0.821496
Lynx1	blue	0.696377	0.0469195	0.727192	-0.00878899	601.843	301.512	300.331	1.18164	-0.240165	0.388588	-0.536972	0.0390174	0.777137	0.000651796	0.727192	0.00212657	0.696377	0.00392497	0.0469195	0.868123	-0.00878899	0.9752
Kdelc1	blue	0.941973	-0.361189	0.537302	0.125092	1124.48	991.828	132.655	859.173	0.0933877	0.740618	-0.870392	2.44173e-05	0.777005	0.000654088	0.537302	0.0388745	0.941973	1.57099e-07	-0.361189	0.185933	0.125092	0.656898
Ube2d1	blue	0.928571	-0.314817	0.556746	0.00673082	1067	924.795	142.206	782.59	0.0687627	0.807618	-0.84572	7.12135e-05	0.776957	0.000654914	0.556746	0.0311064	0.928571	5.86837e-07	-0.314817	0.253095	0.00673082	0.981007
Sccpdh	blue	0.981008	-0.388576	0.517746	0.0402353	1374.98	1241.92	133.064	1108.85	0.126673	0.652812	-0.90353	3.89106e-06	0.776857	0.000656655	0.517746	0.0480604	0.981008	1.21405e-10	-0.388576	0.152325	0.0402353	0.886789
Rnf41	blue	0.98241	-0.392401	0.526172	0.0329623	1386.94	1249.54	137.402	1112.14	0.135405	0.630408	-0.911797	2.21832e-06	0.776392	0.000664795	0.526172	0.0439252	0.98241	7.39958e-11	-0.392401	0.14798	0.0329623	0.907163
Klhl18	blue	0.986896	-0.403436	0.518288	0.0482634	1415.15	1282.08	133.066	1149.02	0.146482	0.602417	-0.922769	9.61125e-07	0.776287	0.000666641	0.518288	0.0477861	0.986896	1.10356e-11	-0.403436	0.135912	0.0482634	0.864377
Spats2	blue	0.935834	-0.369588	0.494177	-0.0632791	1102.74	985.293	117.446	867.847	0.110454	0.695148	-0.886672	1.06292e-05	0.776217	0.000667875	0.494177	0.0611487	0.935834	2.97521e-07	-0.369588	0.175155	-0.0632791	0.822726
Prkd2	blue	0.979072	-0.38283	0.523247	0.13167	1374	1237.08	136.923	1100.16	0.133656	0.634872	-0.909337	2.63663e-06	0.775681	0.000677402	0.523247	0.0453296	0.979072	2.27142e-10	-0.38283	0.159011	0.13167	0.639955
H2afx	blue	0.96174	-0.387326	0.502633	0.00914144	1258.32	1133.65	124.678	1008.97	0.131817	0.639579	-0.905903	3.32883e-06	0.774086	0.000706363	0.502633	0.0561866	0.96174	1.09968e-08	-0.387326	0.153762	0.00914144	0.974206
Ckap5	blue	0.987823	-0.398686	0.528872	0.077889	1418.51	1279.42	139.092	1140.32	0.138879	0.621578	-0.912752	2.07171e-06	0.773873	0.000710311	0.528872	0.0426575	0.987823	6.86674e-12	-0.398686	0.141021	0.077889	0.782616
4833422C13Rik	blue	0.953897	-0.319647	0.569876	0.105271	1248.25	1085.98	162.267	923.712	0.0813235	0.773257	-0.85519	4.83228e-05	0.773867	0.000710432	0.569876	0.026565	0.953897	3.62573e-08	-0.319647	0.245489	0.105271	0.708864
St8sia4	blue	0.830709	-0.160377	0.601422	0.481469	733.281	564.192	169.089	395.103	-0.0615113	0.827609	-0.71166	0.00292365	0.773172	0.000723425	0.601422	0.017708	0.830709	0.000125335	-0.160377	0.568022	0.481469	0.0691942
C030039L03Rik	blue	0.978218	-0.381155	0.529756	0.0782753	1356.26	1219.9	136.361	1083.54	0.128518	0.648055	-0.901682	4.38159e-06	0.773164	0.000723566	0.529756	0.0422483	0.978218	2.93962e-10	-0.381155	0.160996	0.0782753	0.781562
Ppip5k1	blue	0.850211	-0.193952	0.607508	0.0742257	777.492	610.889	166.602	444.287	-0.0550074	0.845623	-0.718054	0.00257084	0.773061	0.000725508	0.607508	0.0162993	0.850211	5.94438e-05	-0.193952	0.488544	0.0742257	0.79263
2610528A11Rik	blue	0.622647	0.144593	0.705219	-0.0104505	474.31	210.239	264.071	-53.8315	-0.322634	0.240856	-0.450078	0.0922941	0.772712	0.000732125	0.705219	0.00331718	0.622647	0.0131688	0.144593	0.607154	-0.0104505	0.970514
Hoxc6	blue	0.761588	-0.0590606	0.658905	0.374937	587.556	383.747	203.809	179.938	-0.144778	0.606689	-0.627068	0.012349	0.771847	0.000748739	0.658905	0.00755083	0.761588	0.000970071	-0.0590606	0.834388	0.374937	0.168511
Gm3718	blue	0.725079	-0.0193803	0.693418	0.304855	575.657	322.063	253.593	68.47	-0.194794	0.486622	-0.576948	0.0243375	0.771741	0.000750785	0.693418	0.00414701	0.725079	0.00222333	-0.0193803	0.945345	0.304855	0.269232
Pms2	blue	0.962978	-0.37563	0.510586	0.0831673	1277.65	1145.26	132.389	1012.87	0.127129	0.651635	-0.898754	5.26408e-06	0.771625	0.00075304	0.510586	0.0517942	0.962978	8.90573e-09	-0.37563	0.167661	0.0831673	0.768245
Ppargc1a	blue	-0.693939	-0.00629017	-0.682665	-0.374479	486.984	263.29	223.694	39.5965	0.228614	0.412476	0.542305	0.0367506	-0.77092	0.000766871	-0.682665	0.00503943	-0.693939	0.00410726	-0.00629017	0.98225	-0.374479	0.169073
Micall1	blue	0.979505	-0.405451	0.501384	0.0479488	1361.59	1237.92	123.67	1114.25	0.152041	0.588557	-0.922853	9.54571e-07	0.770812	0.000769005	0.501384	0.0569004	0.979505	1.98491e-10	-0.405451	0.133782	0.0479488	0.865254
B3gnt8	blue	0.962235	-0.356941	0.537573	0.0218554	1251.39	1115.72	135.666	980.054	0.113827	0.68627	-0.883214	1.28111e-05	0.769387	0.000797634	0.537573	0.038757	0.962235	1.01154e-08	-0.356941	0.191544	0.0218554	0.938376
Ankrd50	blue	0.969957	-0.385297	0.502541	0.0926263	1304.35	1180.36	123.988	1056.37	0.136855	0.626718	-0.906052	3.29591e-06	0.769198	0.000801498	0.502541	0.0562389	0.969957	2.32981e-09	-0.385297	0.156117	0.0926263	0.742666
G2e3	blue	0.960314	-0.353943	0.525994	0.169194	1256.11	1120.65	135.462	985.185	0.110565	0.694857	-0.879718	1.53838e-05	0.769153	0.000802418	0.525994	0.0440098	0.960314	1.39013e-08	-0.353943	0.195569	0.169194	0.546635
Gsg2	blue	0.863096	-0.203051	0.637026	0.132607	885.39	668.8	216.591	452.209	-0.0266965	0.924759	-0.742427	0.00152425	0.769123	0.000803029	0.637026	0.0106477	0.863096	3.42248e-05	-0.203051	0.467959	0.132607	0.637555
Dyx1c1	blue	0.949494	-0.353169	0.542375	0.27461	1167.09	1032.47	134.616	897.856	0.10014	0.722523	-0.869203	2.58336e-05	0.769063	0.000804267	0.542375	0.0367217	0.949494	6.48959e-08	-0.353169	0.196617	0.27461	0.321926
Enpp2	blue	-0.658708	-0.0557921	-0.672287	0.0406525	437.735	220.079	217.657	2.42224	0.245178	0.378456	0.523663	0.0451278	-0.768841	0.000808833	-0.672287	0.00603856	-0.658708	0.00757515	-0.0557921	0.843446	0.0406525	0.885623
Efnb3	blue	0.858737	-0.217449	0.605212	0.111322	802.642	634.49	168.152	466.339	-0.0133626	0.962302	-0.755414	0.00112697	0.768777	0.000810158	0.605212	0.0168202	0.858737	4.14994e-05	-0.217449	0.436276	0.111322	0.69286
Syde1	blue	0.964695	-0.389542	0.502403	0.0609684	1271.91	1147.85	124.057	1023.79	0.139938	0.618895	-0.90857	2.77978e-06	0.768632	0.000813154	0.502403	0.0563176	0.964695	6.5689e-09	-0.389542	0.151219	0.0609684	0.829109
Haus6	blue	0.903714	-0.294443	0.563854	0.397673	935.475	794.893	140.582	654.311	0.0502757	0.858773	-0.818375	0.000191813	0.768099	0.000824247	0.563854	0.0285807	0.903714	3.84465e-06	-0.294443	0.286746	0.397673	0.142127
Zfp783	blue	0.858791	-0.231797	0.550809	0.0943497	779.297	643.955	135.342	508.613	-0.0131681	0.96285	-0.754552	0.00115042	0.767721	0.000832208	0.550809	0.0333416	0.858791	4.14018e-05	-0.231797	0.405819	0.0943497	0.738032
Dfna5	blue	0.981565	-0.415148	0.503349	0.0346328	1353.03	1231.93	121.104	1110.82	0.145662	0.604471	-0.913082	2.02292e-06	0.76742	0.000838577	0.503349	0.0557805	0.981565	1.00185e-10	-0.415148	0.123854	0.0346328	0.902478
6430548M08Rik	blue	0.990426	-0.41252	0.515025	0.08781	1431.6	1300.19	131.41	1168.78	0.15622	0.578225	-0.923512	9.04202e-07	0.767293	0.00084128	0.515025	0.0494554	0.990426	1.44662e-12	-0.41252	0.126493	0.08781	0.755661
Lca5l	blue	0.875125	-0.241747	0.604641	0.0837401	863.583	690.24	173.343	516.897	0.0096246	0.972843	-0.776727	0.000658932	0.767102	0.000845349	0.604641	0.0169516	0.875125	1.9402e-05	-0.241747	0.385375	0.0837401	0.766689
Muc4	blue	0.657625	0.0856752	0.735373	0.389568	566.803	243.617	323.186	-79.5686	-0.295817	0.284397	-0.470954	0.0764071	0.766771	0.00085245	0.735373	0.00178316	0.657625	0.00770966	0.0856752	0.76144	0.389568	0.151189
BC021785	blue	0.730191	-0.0242907	0.701524	0.0964019	625.357	338.647	286.71	51.9365	-0.192959	0.490816	-0.573731	0.0253322	0.76669	0.000854195	0.701524	0.00356132	0.730191	0.001995	-0.0242907	0.931524	0.0964019	0.732524
Kif24	blue	0.637703	0.0729305	0.731831	0.171862	559.26	213.873	345.387	-131.515	-0.29619	0.283762	-0.470304	0.0768702	0.766493	0.000858438	0.731831	0.00192589	0.637703	0.0105391	0.0729305	0.796177	0.171862	0.540234
Zfc3h1	blue	0.944998	-0.356348	0.513624	0.0290168	1136.84	1016.96	119.887	897.069	0.113212	0.687885	-0.879632	1.54516e-05	0.76642	0.000860027	0.513624	0.050185	0.944998	1.11742e-07	-0.356348	0.192336	0.0290168	0.918239
Lxn	blue	0.976831	-0.382753	0.518713	0.120805	1352.94	1220.7	132.248	1088.45	0.134883	0.63174	-0.901122	4.53998e-06	0.76624	0.000863946	0.518713	0.0475716	0.976831	4.37693e-10	-0.382753	0.159102	0.120805	0.668024
Dkk3	blue	0.966049	-0.3597	0.539411	0.059509	1278.15	1140.7	137.449	1003.25	0.119534	0.671335	-0.885771	1.11656e-05	0.766237	0.000864009	0.539411	0.0379684	0.966049	5.11068e-09	-0.3597	0.187887	0.059509	0.833147
Mettl3	blue	0.982181	-0.397701	0.524837	0.076458	1372.26	1238.53	133.721	1104.81	0.144021	0.608592	-0.910047	2.50959e-06	0.766026	0.0008686	0.524837	0.0445618	0.982181	8.0444e-11	-0.397701	0.142097	0.076458	0.786524
Zfp7	blue	0.970034	-0.39787	0.503921	0.052694	1304.8	1179.8	125.002	1054.8	0.151167	0.590728	-0.916986	1.51501e-06	0.76582	0.000873121	0.503921	0.0554572	0.970034	2.29217e-09	-0.39787	0.141912	0.052694	0.852048
Lgals4	blue	0.828636	-0.179926	0.608846	0.197733	701.21	537.589	163.622	373.967	-0.0526461	0.852181	-0.713061	0.00284327	0.765707	0.000875603	0.608846	0.0160015	0.828636	0.000134935	-0.179926	0.521091	0.197733	0.479939
Kcnk3	blue	0.643355	0.0973252	0.749193	0.277703	606.101	231.833	374.268	-142.434	-0.30555	0.268087	-0.459559	0.0848144	0.765109	0.000888827	0.749193	0.00130522	0.643355	0.00966532	0.0973252	0.73005	0.277703	0.316283
Arl11	blue	0.751776	-0.0568218	0.657772	0.467112	580.537	374.687	205.85	168.838	-0.160764	0.567076	-0.604126	0.0170709	0.76489	0.000893716	0.657772	0.00769129	0.751776	0.00122863	-0.0568218	0.84059	0.467112	0.0791723
Kcnj4	blue	0.745517	-0.0246682	0.680882	0.223781	630.984	386.366	244.617	141.749	-0.193353	0.489912	-0.570991	0.026204	0.764344	0.000905989	0.680882	0.00520102	0.745517	0.00142082	-0.0246682	0.930462	0.223781	0.422695
Dgke	blue	0.947929	-0.36632	0.499748	0.0118793	1181.49	1059.21	122.279	936.936	0.11969	0.670928	-0.883952	1.23171e-05	0.764262	0.000907852	0.499748	0.0578449	0.947929	7.88367e-08	-0.36632	0.179299	0.0118793	0.966484
Zbtb45	blue	0.952044	-0.379895	0.49592	0.0291796	1196.89	1076.61	120.285	956.324	0.132324	0.638281	-0.896415	6.07096e-06	0.764092	0.000911707	0.49592	0.0601006	0.952044	4.66329e-08	-0.379895	0.1625	0.0291796	0.917781
Clip3	blue	0.954294	-0.381014	0.512474	0.0235554	1174.61	1057.63	116.972	940.662	0.119143	0.672355	-0.882845	1.30643e-05	0.763703	0.000920586	0.512474	0.0507894	0.954294	3.43075e-08	-0.381014	0.161164	0.0235554	0.933592
Chsy1	blue	0.990093	-0.408829	0.506952	0.117471	1430.5	1303.39	127.111	1176.28	0.155765	0.579347	-0.91941	1.25711e-06	0.763645	0.000921901	0.506952	0.0537686	0.990093	1.80581e-12	-0.408829	0.130264	0.117471	0.676721
Polm	blue	0.982977	-0.405297	0.499019	0.0884229	1386.69	1262.78	123.908	1138.88	0.157473	0.575141	-0.920767	1.12947e-06	0.763294	0.000929978	0.499019	0.0582701	0.982977	5.98991e-11	-0.405297	0.133945	0.0884229	0.754003
Fads3	blue	0.982344	-0.417827	0.503495	0.0885696	1361.47	1238.12	123.355	1114.76	0.157286	0.575601	-0.920491	1.15454e-06	0.763205	0.000932047	0.503495	0.0556977	0.982344	7.58169e-11	-0.417827	0.121202	0.0885696	0.753607
Acsm2	blue	-0.665213	-0.0618688	-0.70423	-0.26262	501.266	243.531	257.735	-14.2045	0.282978	0.306793	0.480188	0.0700457	-0.763166	0.000932947	-0.70423	0.00338121	-0.665213	0.0068048	-0.0618688	0.826621	-0.26262	0.344339
Tmem229a	blue	0.901224	-0.278449	0.580244	0.15679	944.646	789.316	155.33	633.986	0.03738	0.894781	-0.800433	0.000337859	0.763053	0.000935563	0.580244	0.023349	0.901224	4.51073e-06	-0.278449	0.314932	0.15679	0.57682
Ttll12	blue	0.98224	-0.426381	0.48664	0.0544954	1360.71	1244.28	116.437	1127.84	0.162196	0.563581	-0.925237	7.82907e-07	0.763042	0.000935827	0.48664	0.0658333	0.98224	7.87543e-11	-0.426381	0.112998	0.0544954	0.847044
Ppl	blue	0.795096	-0.167389	0.577124	-0.208763	574.645	434.485	140.16	294.324	-0.0671134	0.812156	-0.695375	0.00399911	0.762488	0.000948748	0.577124	0.0242839	0.795096	0.000395584	-0.167389	0.550984	-0.208763	0.455257
Capn2	blue	0.969609	-0.393918	0.498009	0.0447621	1283.88	1164.33	119.548	1044.79	0.138748	0.62191	-0.90082	4.62753e-06	0.762072	0.00095855	0.498009	0.058862	0.969609	2.50915e-09	-0.393918	0.146279	0.0447621	0.874141
2310022A10Rik	blue	0.980828	-0.426498	0.494829	0.0604637	1353.21	1235.03	118.178	1116.86	0.169541	0.545802	-0.931567	4.47449e-07	0.762026	0.000959643	0.494829	0.0607548	0.980828	1.29051e-10	-0.426498	0.112888	0.0604637	0.830505
Psg16	blue	0.766399	-0.118137	0.624904	0.108409	526.049	365.169	160.88	204.29	-0.128569	0.647921	-0.632765	0.0113518	0.761334	0.000976149	0.624904	0.0127452	0.766399	0.000860493	-0.118137	0.67498	0.108409	0.700551
Hmha1	blue	0.994926	-0.423417	0.502676	0.11044	1456.37	1331.7	124.67	1207.03	0.168271	0.548858	-0.929218	5.53985e-07	0.760947	0.000985479	0.502676	0.0561618	0.994926	2.35976e-14	-0.423417	0.115796	0.11044	0.695185
Col1a1	blue	0.730484	-0.0331617	0.650322	-0.0222395	521.234	327.919	193.314	134.605	-0.182321	0.515464	-0.578502	0.0238675	0.760823	0.000988485	0.650322	0.00866736	0.730484	0.00198251	-0.0331617	0.906604	-0.0222395	0.937295
Pld2	blue	0.989444	-0.424469	0.491968	0.0572328	1414.12	1296.38	117.737	1178.65	0.169498	0.545904	-0.929658	5.32539e-07	0.76016	0.00100467	0.491968	0.0624956	0.989444	2.72297e-12	-0.424469	0.114797	0.0572328	0.839451
Pcdhb21	blue	0.815564	-0.13765	0.60751	0.0684619	684.178	521.89	162.288	359.602	-0.097397	0.729858	-0.662163	0.00715785	0.75956	0.00101951	0.60751	0.0162988	0.815564	0.000210426	-0.13765	0.624696	0.0684619	0.808445
Notch4	blue	0.976802	-0.390905	0.509507	0.0547608	1335.84	1211.81	124.027	1087.78	0.143549	0.609779	-0.901382	4.46583e-06	0.757833	0.00106323	0.509507	0.0523747	0.976802	4.41211e-10	-0.390905	0.149669	0.0547608	0.846307
Zbtb3	blue	0.966491	-0.379895	0.530462	0.0922888	1266.25	1134.32	131.936	1002.38	0.12613	0.654214	-0.883386	1.26947e-05	0.757256	0.00107816	0.530462	0.041924	0.966491	4.69854e-09	-0.379895	0.162501	0.0922888	0.743575
Pcgf2	blue	0.902754	-0.317006	0.543693	-0.0428236	907.435	782.152	125.283	656.87	0.0650988	0.817706	-0.822088	0.000169322	0.756989	0.00108513	0.543693	0.0361774	0.902754	4.09113e-06	-0.317006	0.24963	-0.0428236	0.879554
Cacna1f	blue	0.893948	-0.317246	0.525575	0.0513194	847.343	739.624	107.72	631.904	0.0632045	0.822932	-0.819857	0.000182557	0.756653	0.00109396	0.525575	0.044209	0.893948	7.03135e-06	-0.317246	0.249252	0.0513194	0.85587
Gm2724	blue	0.843558	-0.212623	0.549298	0.227703	740.965	605.569	135.396	470.172	-0.0153945	0.956575	-0.741135	0.00156925	0.756529	0.00109722	0.549298	0.0339292	0.843558	7.7529e-05	-0.212623	0.446772	0.227703	0.414392
Fam161b	blue	0.976009	-0.421845	0.478785	0.0225012	1326.18	1213.88	112.308	1101.57	0.167493	0.550733	-0.923896	8.75963e-07	0.756403	0.00110056	0.478785	0.0709869	0.976009	5.47896e-10	-0.421845	0.117299	0.0225012	0.936559
Gm7609	blue	0.864527	-0.198249	0.612368	0.15364	844.802	666.656	178.147	488.509	-0.0128122	0.963854	-0.743532	0.00148658	0.756344	0.00110211	0.612368	0.0152378	0.864527	3.20801e-05	-0.198249	0.478769	0.15364	0.584594
Nsg1	blue	0.984986	-0.412019	0.497525	0.0755493	1380.24	1262.63	117.612	1145.02	0.160012	0.568915	-0.916216	1.60569e-06	0.756205	0.00110581	0.497525	0.0591474	0.984986	2.66018e-11	-0.412019	0.127001	0.0755493	0.789008
Darc	blue	-0.874982	0.331691	-0.496289	0.0218875	765.707	670.534	95.173	575.361	-0.0617703	0.826893	0.817888	0.00019494	-0.756117	0.00110813	-0.496289	0.0598804	-0.874982	1.95404e-05	0.331691	0.227143	0.0218875	0.938286
Armcx2	blue	0.942065	-0.32096	0.5447	0.175442	1139.44	1004.4	135.038	869.362	0.083317	0.767838	-0.838521	9.40505e-05	0.755204	0.00113267	0.5447	0.0357653	0.942065	1.5552e-07	-0.32096	0.243446	0.175442	0.531697
Dut	blue	0.941174	-0.349939	0.542782	0.223662	1112.49	978.375	134.114	844.261	0.0976465	0.72919	-0.852674	5.37057e-05	0.755027	0.00113745	0.542782	0.0365528	0.941174	1.71368e-07	-0.349939	0.20103	0.223662	0.422948
Snai1	blue	0.976505	-0.401019	0.511056	0.0407836	1321.12	1197.91	123.206	1074.71	0.150891	0.591413	-0.905914	3.32642e-06	0.755023	0.00113756	0.511056	0.0515429	0.976505	4.78927e-10	-0.401019	0.138495	0.0407836	0.885256
Lgr4	blue	-0.932854	0.351136	-0.502662	0.0163436	1094.95	973.406	121.547	851.859	-0.113216	0.687876	0.867807	2.75828e-05	-0.754591	0.00114937	-0.502662	0.0561697	-0.932854	3.9675e-07	0.351136	0.199387	0.0163436	0.9539
2900092E17Rik	blue	0.978197	-0.432071	0.478569	0.0482867	1330.56	1221.65	108.91	1112.74	0.177859	0.525967	-0.932324	4.1701e-07	0.754464	0.00115283	0.478569	0.0711324	0.978197	2.95819e-10	-0.432071	0.107758	0.0482867	0.864312
Gnb4	blue	0.969141	-0.377178	0.52992	0.110385	1285.33	1154.57	130.764	1023.81	0.132517	0.637785	-0.886586	1.06793e-05	0.754069	0.00116375	0.52992	0.0421732	0.969141	2.76811e-09	-0.377178	0.165776	0.110385	0.695331
4933403G14Rik	blue	0.976589	-0.394043	0.511091	0.0731031	1324.69	1203.63	121.06	1082.57	0.145419	0.60508	-0.898899	5.21714e-06	0.753479	0.00118016	0.511091	0.0515239	0.976589	4.67933e-10	-0.394043	0.14614	0.0731031	0.795705
Samd1	blue	0.985358	-0.435557	0.482574	0.012161	1370.66	1259.96	110.701	1149.26	0.175611	0.531295	-0.928864	5.71757e-07	0.753253	0.00118652	0.482574	0.0684657	0.985358	2.26236e-11	-0.435557	0.104633	0.012161	0.96569
Chst12	blue	0.945861	-0.375865	0.511165	0.0536289	1141.04	1023.17	117.877	905.288	0.136033	0.628808	-0.888811	9.44118e-06	0.752778	0.00119995	0.511165	0.0514848	0.945861	1.01038e-07	-0.375865	0.167375	0.0536289	0.84945
Ankrd44	blue	0.9166	-0.291754	0.565406	0.20035	1013.2	868.7	144.504	724.196	0.0504016	0.858423	-0.803176	0.000310995	0.752774	0.00120005	0.565406	0.0280505	0.9166	1.55995e-06	-0.291754	0.291377	0.20035	0.474025
E2f1	blue	0.96193	-0.384471	0.516197	0.138558	1233.45	1110.38	123.074	987.304	0.142398	0.61268	-0.894813	6.6813e-06	0.752415	0.00121026	0.516197	0.048851	0.96193	1.06511e-08	-0.384471	0.157082	0.138558	0.62239
1810030O07Rik	blue	0.986888	-0.434112	0.494867	0.138782	1380.13	1264.57	115.564	1149	0.174248	0.534537	-0.926313	7.14411e-07	0.752065	0.00122032	0.494867	0.060732	0.986888	1.10827e-11	-0.434112	0.10592	0.138782	0.621824
Fam43a	blue	0.979128	-0.399514	0.5202	0.148655	1340.77	1213.27	127.498	1085.77	0.156475	0.577597	-0.908246	2.84206e-06	0.751771	0.00122878	0.5202	0.0468275	0.979128	2.2328e-10	-0.399514	0.140122	0.148655	0.596983
Nfatc2ip	blue	0.977856	-0.420169	0.490212	0.0726661	1326.62	1213.16	113.464	1099.69	0.172393	0.538965	-0.923989	8.6922e-07	0.751596	0.00123385	0.490212	0.0635821	0.977856	3.26983e-10	-0.420169	0.118916	0.0726661	0.796902
Pold4	blue	0.975082	-0.410862	0.498932	0.0924772	1299.46	1185.5	113.956	1071.54	0.153531	0.584864	-0.904854	3.56827e-06	0.751323	0.0012418	0.498932	0.058321	0.975082	6.99372e-10	-0.410862	0.128178	0.0924772	0.743068
5430410E06Rik	blue	0.962523	-0.41349	0.48079	0.130736	1217.81	1113.88	103.938	1009.94	0.160438	0.567873	-0.91134	2.29152e-06	0.750902	0.00125413	0.48079	0.0696444	0.962523	9.63157e-09	-0.41349	0.125514	0.130736	0.642352
Zfp781	blue	0.700032	-0.0718625	0.630106	0.20557	415.122	249.503	165.619	83.8839	-0.157407	0.575304	-0.593406	0.0197036	0.750813	0.00125675	0.630106	0.0118091	0.700032	0.00366385	-0.0718625	0.799106	0.20557	0.462336
Lpin3	blue	0.98202	-0.423202	0.486317	0.112868	1345.11	1233.45	111.658	1121.79	0.165721	0.555017	-0.916294	1.59639e-06	0.750572	0.00126387	0.486317	0.0660399	0.98202	8.52534e-11	-0.423202	0.116001	0.112868	0.68879
Rufy4	blue	0.722042	-0.0676812	0.59426	0.0593123	481.55	323.234	158.316	164.918	-0.133659	0.634865	-0.616439	0.0143904	0.750098	0.00127797	0.59426	0.0194831	0.722042	0.00236861	-0.0676812	0.810593	0.0593123	0.833691
Tbc1d2	blue	0.968436	-0.417429	0.477078	0.103195	1257.3	1150.85	106.453	1044.4	0.160196	0.568465	-0.91007	2.50558e-06	0.749875	0.00128465	0.477078	0.0721437	0.968436	3.2004e-09	-0.417429	0.121594	0.103195	0.71438
Unc119b	blue	0.986608	-0.433796	0.481584	0.00604518	1387.79	1275.64	112.146	1163.49	0.18315	0.513524	-0.932507	4.09924e-07	0.749357	0.00130026	0.481584	0.0691183	0.986608	1.27031e-11	-0.433796	0.106203	0.00604518	0.982941
Tnfaip8l2	blue	0.976662	-0.402433	0.49249	0.083716	1324.2	1210.04	114.158	1095.88	0.158298	0.573114	-0.907382	3.01421e-06	0.749084	0.00130856	0.49249	0.0621757	0.976662	4.58644e-10	-0.402433	0.13698	0.083716	0.766754
2010002M12Rik	blue	0.930875	-0.35881	0.53254	0.212401	1045.66	919.089	126.57	792.52	0.0981452	0.727855	-0.847187	6.7174e-05	0.749042	0.00130982	0.53254	0.0409791	0.930875	4.7687e-07	-0.35881	0.189062	0.212401	0.447257
H2afj	blue	0.968918	-0.411532	0.475798	0.0401767	1278.13	1169.66	108.47	1061.19	0.169889	0.544965	-0.918835	1.31473e-06	0.748946	0.00131276	0.475798	0.0730207	0.968918	2.89929e-09	-0.411532	0.127495	0.0401767	0.886953
Gm13272	blue	0.859221	-0.280093	0.547692	0.146328	727.99	610.155	117.835	492.32	0.0442086	0.875686	-0.793094	0.00041921	0.748885	0.0013146	0.547692	0.0345623	0.859221	4.06338e-05	-0.280093	0.311964	0.146328	0.602803
Fbxo25	blue	0.925691	-0.355647	0.519468	-0.121802	1004.51	891.487	113.02	778.467	0.0988592	0.725945	-0.847739	6.57061e-05	0.748879	0.00131478	0.519468	0.0471929	0.925691	7.53399e-07	-0.355647	0.193275	-0.121802	0.665429
Rab13	blue	0.979285	-0.422867	0.487132	0.099703	1328.6	1219.13	109.47	1109.66	0.17096	0.542395	-0.919278	1.27008e-06	0.748318	0.00133202	0.487132	0.0655203	0.979285	2.12613e-10	-0.422867	0.11632	0.099703	0.723691
Cyp20a1	blue	0.978885	-0.411211	0.498703	0.135861	1328.66	1211.61	117.049	1094.56	0.16132	0.565716	-0.909452	2.61566e-06	0.748132	0.00133779	0.498703	0.0584547	0.978885	2.40525e-10	-0.411211	0.127822	0.135861	0.629247
Camkk1	blue	0.974178	-0.437226	0.464959	0.0453912	1300.41	1196.69	103.723	1092.96	0.183524	0.51265	-0.931611	4.45603e-07	0.748088	0.00133915	0.464959	0.0807519	0.974178	8.79888e-10	-0.437226	0.103159	0.0453912	0.872385
Zfp319	blue	0.971661	-0.412442	0.498128	0.073439	1284.87	1170.55	114.32	1056.23	0.170106	0.544444	-0.918132	1.38808e-06	0.748026	0.00134107	0.498128	0.058792	0.971661	1.60059e-09	-0.412442	0.126572	0.073439	0.794784
Mutyh	blue	0.914181	-0.317638	0.561864	0.196039	989.934	844.028	145.906	698.123	0.0692947	0.806156	-0.81725	0.000199095	0.747955	0.00134328	0.561864	0.0292715	0.914181	1.86733e-06	-0.317638	0.248636	0.196039	0.483785
Ggta1	blue	0.875172	-0.290246	0.504335	0.133288	817.056	707.917	109.139	598.777	0.062503	0.824869	-0.81036	0.000248786	0.747857	0.00134631	0.504335	0.0552246	0.875172	1.93566e-05	-0.290246	0.293993	0.133288	0.635813
2810403A07Rik	blue	0.964472	-0.406114	0.496869	0.12178	1227.99	1118.1	109.893	1008.21	0.159903	0.56918	-0.907636	2.96268e-06	0.747733	0.0013502	0.496869	0.0595354	0.964472	6.83923e-09	-0.406114	0.133087	0.12178	0.665487
Spryd3	blue	0.975858	-0.43976	0.459668	0.0217121	1313.78	1210.88	102.892	1107.99	0.182983	0.513915	-0.930645	4.86986e-07	0.747663	0.00135239	0.459668	0.0847312	0.975858	5.70518e-10	-0.43976	0.100949	0.0217121	0.93878
Zfr2	blue	0.961786	-0.384755	0.497338	-0.0415829	1227.48	1111.99	115.491	996.495	0.145678	0.604432	-0.893156	7.36523e-06	0.747479	0.00135815	0.497338	0.0592576	0.961786	1.09116e-08	-0.384755	0.156749	-0.0415829	0.883021
Dcaf17	blue	0.974962	-0.409505	0.496575	0.0994166	1295.96	1183.88	112.076	1071.81	0.155308	0.580472	-0.902749	4.09239e-06	0.747441	0.00135934	0.496575	0.0597106	0.974962	7.21329e-10	-0.409505	0.129568	0.0994166	0.724456
Zfp346	blue	0.989881	-0.444243	0.486434	0.0850375	1403.07	1289.98	113.088	1176.9	0.191401	0.494391	-0.938442	2.28651e-07	0.747041	0.00137194	0.486434	0.0659653	0.989881	2.07098e-12	-0.444243	0.0971221	0.0850375	0.763169
Erp29	blue	0.967558	-0.42199	0.467762	0.0520845	1267.91	1161.65	106.265	1055.38	0.171591	0.540884	-0.918138	1.3874e-06	0.746548	0.00138761	0.467762	0.078699	0.967558	3.81674e-09	-0.42199	0.117159	0.0520845	0.853742
Ankrd27	blue	0.975362	-0.439988	0.459668	0.0275931	1304.12	1202	102.119	1099.88	0.183161	0.513497	-0.929265	5.51677e-07	0.746104	0.00140184	0.459668	0.0847313	0.975362	6.50342e-10	-0.439988	0.100752	0.0275931	0.922239
Lrp12	blue	0.987142	-0.446104	0.478623	0.0768086	1382.96	1272.4	110.555	1161.85	0.19443	0.487452	-0.940293	1.88334e-07	0.745863	0.00140959	0.478623	0.071096	0.987142	9.7623e-12	-0.446104	0.0955633	0.0768086	0.785567
Rccd1	blue	0.924026	-0.376202	0.485063	0.0671354	980.445	885.092	95.3525	789.74	0.110181	0.69587	-0.855961	4.67652e-05	0.745781	0.00141226	0.485063	0.0668458	0.924026	8.66578e-07	-0.376202	0.166963	0.0671354	0.812095
Zik1	blue	0.837632	-0.233022	0.570814	0.150667	675.075	544.251	130.823	413.428	0.00880731	0.975149	-0.754482	0.00115235	0.745675	0.0014157	0.570814	0.0262609	0.837632	9.72473e-05	-0.233022	0.403272	0.150667	0.591971
Cldn15	blue	0.918088	-0.337638	0.547023	0.032799	992.726	860.046	132.679	727.367	0.0872216	0.757252	-0.832676	0.00011675	0.745455	0.00142285	0.547023	0.0348288	0.918088	1.39277e-06	-0.337638	0.21841	0.032799	0.907621
Wnt4	blue	0.962663	-0.405008	0.492238	0.0476673	1208.95	1101.58	107.371	994.209	0.152964	0.586268	-0.898383	5.38557e-06	0.745419	0.001424	0.492238	0.0623303	0.962663	9.4043e-09	-0.405008	0.134249	0.0476673	0.866038
LOC100047133	blue	0.698375	-0.0334661	0.655148	0.157041	459.893	257.995	201.898	56.0965	-0.185769	0.507414	-0.559403	0.0301434	0.745172	0.00143208	0.655148	0.00802471	0.698375	0.00378046	-0.0334661	0.90575	0.157041	0.576203
Cxcl14	blue	0.95108	-0.377172	0.49326	0.043906	1170.87	1060.29	110.573	949.721	0.145625	0.604563	-0.890595	8.53693e-06	0.744969	0.00143873	0.49326	0.0617054	0.95108	5.29475e-08	-0.377172	0.165783	0.043906	0.876531
Mansc1	blue	0.957916	-0.391515	0.513838	0.14717	1191.36	1072.42	118.945	953.475	0.131652	0.640002	-0.876563	1.80603e-05	0.744911	0.00144065	0.513838	0.0500731	0.957916	2.02387e-08	-0.391515	0.148978	0.14717	0.600695
Fgfbp3	blue	0.91989	-0.32178	0.557137	0.128724	1023.24	879.436	143.802	735.633	0.0740213	0.793189	-0.818367	0.000191862	0.744346	0.00145932	0.557137	0.0309634	0.91989	1.21064e-06	-0.32178	0.242175	0.128724	0.647522
P2ry6	blue	0.889665	-0.26667	0.538452	0.0674162	910.749	781.243	129.506	651.737	0.0490169	0.862278	-0.793168	0.000418315	0.744151	0.00146581	0.538452	0.0383785	0.889665	8.99844e-06	-0.26667	0.336673	0.0674162	0.811322
Tspan5	blue	0.616969	0.113768	0.689224	0.546446	412.149	189.952	222.197	-32.2458	-0.312191	0.25729	-0.431858	0.107951	0.744049	0.00146922	0.689224	0.00447874	0.616969	0.0142829	0.113768	0.686425	0.546446	0.0350595
Slc12a6	blue	0.971887	-0.390149	0.509374	0.135788	1288.42	1170.02	118.402	1051.61	0.148148	0.598249	-0.892081	7.8395e-06	0.743933	0.00147309	0.509374	0.0524468	0.971887	1.5205e-09	-0.390149	0.150528	0.135788	0.629432
Tbc1d9	blue	0.819167	-0.163315	0.593429	0.0148075	664.065	516.184	147.881	368.303	-0.0448458	0.873907	-0.698448	0.00377526	0.743294	0.00149463	0.593429	0.0196978	0.819167	0.000186818	-0.163315	0.560857	0.0148075	0.958229
Morn4	blue	0.986909	-0.441272	0.476475	0.0815974	1373.68	1266.73	106.957	1159.77	0.182762	0.514431	-0.926045	7.3098e-07	0.743283	0.001495	0.476475	0.0725558	0.986909	1.09648e-11	-0.441272	0.0996472	0.0815974	0.772512
Zbtb46	blue	0.913722	-0.320737	0.521855	-0.0324573	967.03	851.276	115.754	735.521	0.0742774	0.792488	-0.817372	0.000198292	0.743095	0.00150139	0.521855	0.0460095	0.913722	1.93112e-06	-0.320737	0.243791	-0.0324573	0.90858
Klhl6	blue	0.954455	-0.378859	0.511941	0.178331	1177.6	1060.53	117.073	943.454	0.136877	0.626662	-0.87995	1.52005e-05	0.743074	0.00150211	0.511941	0.0510719	0.954455	3.35434e-08	-0.378859	0.163745	0.178331	0.524852
Tmem136	blue	0.982845	-0.44134	0.477135	0.188482	1344.97	1238.75	106.221	1132.53	0.186339	0.506089	-0.92928	5.50918e-07	0.742942	0.00150661	0.477135	0.0721052	0.982845	6.29496e-11	-0.44134	0.0995883	0.188482	0.501121
Fbxl19	blue	0.996951	-0.460073	0.466347	0.0437012	1452.43	1345.16	107.27	1237.89	0.204678	0.464323	-0.94742	8.38784e-08	0.742742	0.00151343	0.466347	0.0797307	0.996951	8.65363e-16	-0.460073	0.0844219	0.0437012	0.877103
Mex3d	blue	0.989761	-0.443737	0.487072	0.08286	1400.4	1287.18	113.219	1173.96	0.194738	0.486748	-0.937078	2.6278e-07	0.742339	0.00152726	0.487072	0.065558	0.989761	2.23527e-12	-0.443737	0.0975485	0.08286	0.769079
Pqlc2	blue	0.983131	-0.451881	0.463328	0.0483295	1355.02	1251.09	103.93	1147.16	0.197803	0.479779	-0.94006	1.93053e-07	0.742257	0.0015301	0.463328	0.081964	0.983131	5.64704e-11	-0.451881	0.0908374	0.0483295	0.864193
Slc26a2	blue	0.95219	-0.394755	0.481799	0.000702411	1155.13	1051.59	103.544	948.041	0.140789	0.616741	-0.882969	1.29788e-05	0.74218	0.00153275	0.481799	0.068976	0.95219	4.5733e-08	-0.394755	0.145347	0.000702411	0.998018
Gm88	blue	0.716576	-0.0401335	0.662863	0.244982	486.334	284.479	201.854	82.625	-0.160694	0.567246	-0.581391	0.0230123	0.742085	0.00153603	0.662863	0.00707565	0.716576	0.00264922	-0.0401335	0.887074	0.244982	0.378849
Tonsl	blue	0.990941	-0.44637	0.471744	0.0586015	1407.74	1300.89	106.855	1194.03	0.193118	0.490451	-0.935084	3.20295e-07	0.741965	0.00154019	0.471744	0.0758476	0.990941	1.01156e-12	-0.44637	0.095342	0.0586015	0.835659
Col5a1	blue	0.95502	-0.376174	0.491946	0.115105	1186.06	1077.08	108.979	968.101	0.135066	0.631272	-0.876814	1.78339e-05	0.741748	0.00154777	0.491946	0.0625096	0.95502	3.09732e-08	-0.376174	0.166997	0.115105	0.682915
4732440D04Rik	blue	0.955073	-0.373658	0.507429	0.0810634	1192.13	1075.87	116.267	959.6	0.13932	0.620458	-0.880682	1.46347e-05	0.741362	0.00156126	0.507429	0.0535067	0.955073	3.07398e-08	-0.373658	0.170084	0.0810634	0.773965
Adora1	blue	0.761968	-0.179281	0.544517	-0.0270817	444.392	340.961	103.432	237.529	-0.0858515	0.760962	-0.655357	0.0079977	0.741209	0.00156664	0.544517	0.03584	0.761968	0.000961031	-0.179281	0.52261	-0.0270817	0.923676
Zfp53	blue	0.802969	-0.153615	0.642369	0.24046	706.368	478.24	228.128	250.112	-0.0734949	0.794631	-0.667607	0.00653736	0.741102	0.00157039	0.642369	0.00981351	0.802969	0.000312951	-0.153615	0.584656	0.24046	0.387986
LOC100044193	blue	0.968232	-0.432235	0.492422	0.147163	1242.14	1131.93	110.21	1021.72	0.172218	0.539382	-0.912908	2.0485e-06	0.74069	0.00158499	0.492422	0.0622169	0.968232	3.33578e-09	-0.432235	0.10761	0.147163	0.600711
Pycr2	blue	0.984654	-0.454386	0.458247	0.0391502	1362.22	1259.41	102.809	1156.6	0.195893	0.484118	-0.936359	2.8242e-07	0.740466	0.00159295	0.458247	0.0858229	0.984654	3.06505e-11	-0.454386	0.0888402	0.0391502	0.889825
Fli1	blue	0.886101	-0.249754	0.587252	0.185124	907.43	745.062	162.367	582.695	0.01906	0.946247	-0.759173	0.00102919	0.740113	0.00160559	0.587252	0.0213493	0.886101	1.09665e-05	-0.249754	0.369332	0.185124	0.508916
Ear2	blue	-0.666078	0.0949525	-0.570953	0.0666307	303.341	192.554	110.787	81.7675	0.155803	0.579253	0.584105	0.0222304	-0.739908	0.00161297	-0.570953	0.0262163	-0.666078	0.00670717	0.0949525	0.736413	0.0666307	0.813485
Pilra	blue	0.877571	-0.23904	0.564194	0.144641	864.786	726.559	138.227	588.331	0.0221957	0.937419	-0.761958	0.000961248	0.739763	0.00161821	0.564194	0.0284641	0.877571	1.71658e-05	-0.23904	0.390881	0.144641	0.607035
Slc2a10	blue	0.777383	-0.116115	0.625552	0.0719785	563.645	397.799	165.846	231.953	-0.0923091	0.74352	-0.647314	0.00908779	0.739623	0.00162325	0.625552	0.0126256	0.777383	0.000647542	-0.116115	0.680269	0.0719785	0.798787
Fam49b	blue	0.744886	-0.124796	0.549127	-0.306385	464.651	338.205	126.446	211.759	-0.0881223	0.754816	-0.650864	0.00859316	0.738987	0.00164644	0.549127	0.0339965	0.744886	0.00144145	-0.124796	0.657664	-0.306385	0.266714
Mecom	blue	0.63252	0.0927109	0.69354	0.513277	430.122	202.41	227.711	-25.3013	-0.273327	0.324283	-0.465221	0.0805589	0.738548	0.00166256	0.69354	0.00413768	0.63252	0.0113934	0.0927109	0.742439	0.513277	0.0503668
4930579G24Rik	blue	0.94939	-0.393358	0.478668	0.0157741	1157.14	1052.49	104.647	947.841	0.160182	0.568497	-0.898692	5.28414e-06	0.73851	0.00166398	0.478668	0.0710658	0.94939	6.5755e-08	-0.393358	0.146905	0.0157741	0.955505
1700030J22Rik	blue	0.601545	0.0643836	0.622468	-0.119205	322.493	158.132	164.361	-6.22861	-0.242002	0.384859	-0.496116	0.0599836	0.738118	0.00167851	0.622468	0.0132028	0.601545	0.0176786	0.0643836	0.819678	-0.119205	0.672192
Tmem216	blue	0.980347	-0.432457	0.496499	0.103114	1330.57	1216.64	113.936	1102.7	0.179628	0.521791	-0.917706	1.43415e-06	0.738078	0.00167999	0.496499	0.0597556	0.980347	1.51404e-10	-0.432457	0.107408	0.103114	0.714596
Gtf2ird1	blue	0.989331	-0.442447	0.47342	0.134725	1393.63	1287.72	105.91	1181.81	0.193686	0.489153	-0.931548	4.48213e-07	0.737863	0.00168802	0.47342	0.0746693	0.989331	2.91783e-12	-0.442447	0.0986426	0.134725	0.632142
Hist3h2a	blue	0.979017	-0.449227	0.459559	0.0502495	1320.39	1220.87	99.5172	1121.35	0.199732	0.475419	-0.937248	2.5831e-07	0.737516	0.00170103	0.459559	0.0848144	0.979017	2.31021e-10	-0.449227	0.0929876	0.0502495	0.858847
Grap	blue	0.98003	-0.425245	0.472871	0.106326	1341.82	1235.44	106.377	1129.07	0.185503	0.508032	-0.922751	9.62529e-07	0.737248	0.00171113	0.472871	0.0750535	0.98003	1.67865e-10	-0.425245	0.114065	0.106326	0.706064
Gnai1	blue	0.951391	-0.379265	0.510497	0.0196013	1144.2	1031.8	112.401	919.394	0.140994	0.616224	-0.878157	1.66635e-05	0.737163	0.00171434	0.510497	0.0518421	0.951391	5.08341e-08	-0.379265	0.163256	0.0196013	0.944723
Ptger1	blue	0.697204	-0.0368724	0.633731	0.274178	401.924	245.816	156.109	89.7072	-0.17702	0.527954	-0.559793	0.030004	0.736813	0.00172764	0.633731	0.0111891	0.697204	0.00386463	-0.0368724	0.896202	0.274178	0.322718
L3mbtl3	blue	0.982055	-0.455176	0.460637	0.0429017	1336.34	1235.82	100.522	1135.3	0.199168	0.476692	-0.935778	2.99169e-07	0.736611	0.00173535	0.460637	0.0839921	0.982055	8.41949e-11	-0.455176	0.0882169	0.0429017	0.879336
Orc6	blue	0.980279	-0.441769	0.456898	0.118461	1336.54	1235.49	101.049	1134.44	0.194946	0.486273	-0.931098	4.67209e-07	0.736152	0.00175295	0.456898	0.0868686	0.980279	1.54824e-10	-0.441769	0.0992218	0.118461	0.674135
Zfp82	blue	0.960167	-0.428722	0.452996	0.035782	1210.24	1112.61	97.6282	1014.98	0.180242	0.520347	-0.916184	1.60953e-06	0.735943	0.00176102	0.452996	0.0899443	0.960167	1.42351e-08	-0.428722	0.110821	0.035782	0.899257
Zyg11a	blue	0.838218	-0.236432	0.540569	-0.00978656	638.96	532.373	106.588	425.785	0.0121683	0.96567	-0.747989	0.00134221	0.735821	0.00176573	0.540569	0.0374774	0.838218	9.5129e-05	-0.236432	0.396225	-0.00978656	0.972386
Ttyh3	blue	0.99086	-0.456873	0.4647	0.0847547	1397.9	1294.6	103.296	1191.3	0.204311	0.465144	-0.939015	2.15452e-07	0.734705	0.00180941	0.4647	0.0809435	0.99086	1.07172e-12	-0.456873	0.0868877	0.0847547	0.763936
Gm70	blue	0.668234	0.0266226	0.669991	-0.131884	423.893	219.988	203.905	16.0837	-0.223802	0.422649	-0.510545	0.0518161	0.734347	0.0018236	0.669991	0.00627937	0.668234	0.00646874	0.0266226	0.924967	-0.131884	0.639407
Gm1987	blue	0.668292	0.0699484	0.66795	0.133209	461.092	256.941	204.151	52.7895	-0.255317	0.358407	-0.478827	0.0709583	0.734144	0.00183167	0.66795	0.00649983	0.668292	0.00646244	0.0699484	0.80436	0.133209	0.636016
Zswim1	blue	0.956771	-0.425339	0.479236	0.0765653	1172.21	1072.25	99.9633	972.282	0.180315	0.520175	-0.914259	1.85681e-06	0.733944	0.00183969	0.479236	0.0706833	0.956771	2.40274e-08	-0.425339	0.113976	0.0765653	0.786231
Hps3	blue	0.978091	-0.426243	0.476223	-0.02667	1305.96	1203.1	102.854	1100.25	0.178189	0.525187	-0.912126	2.16687e-06	0.733937	0.00183996	0.476223	0.0727286	0.978091	3.05186e-10	-0.426243	0.113127	-0.02667	0.924833
9330176C04Rik	blue	0.861448	-0.272355	0.496165	-0.0128929	737.827	638.255	99.5719	538.683	0.0520695	0.853784	-0.785999	0.000512393	0.733929	0.00184027	0.496165	0.0599546	0.861448	3.68387e-05	-0.272355	0.326075	-0.0128929	0.963626
Klc2	blue	0.985491	-0.461639	0.451869	-0.0184995	1358.94	1260.59	98.347	1162.25	0.20422	0.465347	-0.938077	2.37386e-07	0.733858	0.00184314	0.451869	0.0908469	0.985491	2.13299e-11	-0.461639	0.083233	-0.0184995	0.947826
Smtn	blue	0.990449	-0.44879	0.466137	0.0908358	1398.99	1294.62	104.377	1190.24	0.20178	0.47081	-0.935238	3.15509e-07	0.733458	0.00185923	0.466137	0.0798846	0.990449	1.42451e-12	-0.44879	0.0933447	0.0908358	0.74749
Slc35e3	blue	0.853138	-0.303473	0.50177	-0.00371817	671.065	582.077	88.9879	493.089	0.0603946	0.830696	-0.79385	0.000410152	0.733456	0.00185933	0.50177	0.0566787	0.853138	5.26766e-05	-0.303473	0.271519	-0.00371817	0.989507
AA881470	blue	0.989345	-0.455319	0.475514	0.108362	1385.39	1279.45	105.944	1173.51	0.202239	0.469779	-0.935596	3.04587e-07	0.733357	0.0018633	0.475514	0.0732162	0.989345	2.89358e-12	-0.455319	0.0881041	0.108362	0.700674
Zfp61	blue	0.968731	-0.411567	0.491945	0.184375	1241.37	1134.74	106.628	1028.11	0.162468	0.562918	-0.89572	6.33002e-06	0.733252	0.00186758	0.491945	0.06251	0.968731	3.01303e-09	-0.411567	0.12746	0.184375	0.510662
Gprc2a-rs5	blue	0.747221	-0.167711	0.55515	0.146387	410.941	307.06	103.881	203.179	-0.0919449	0.744501	-0.640563	0.0100897	0.732507	0.00189794	0.55515	0.0316959	0.747221	0.00136626	-0.167711	0.550208	0.146387	0.602654
Haus3	blue	0.975149	-0.445132	0.450733	0.0886259	1302.07	1203.96	98.114	1105.85	0.201887	0.470569	-0.933921	3.58431e-07	0.732034	0.00191746	0.450733	0.0917627	0.975149	6.87348e-10	-0.445132	0.0963748	0.0886259	0.753455
Tmem221	blue	0.803682	-0.261989	0.496003	-0.118435	542.637	450.3	92.3364	357.964	0.0259432	0.926877	-0.757115	0.00108182	0.731172	0.00195342	0.496003	0.0600514	0.803682	0.000306234	-0.261989	0.345542	-0.118435	0.674203
Sipa1	blue	0.993891	-0.451964	0.470131	0.106214	1418.64	1314.22	104.422	1209.8	0.202873	0.468358	-0.933231	3.82847e-07	0.730358	0.0019879	0.470131	0.0769934	0.993891	7.87028e-14	-0.451964	0.09077	0.106214	0.706362
Pcyox1	blue	-0.992421	0.473865	-0.450932	-0.0952966	1408.93	1309.36	99.5678	1209.79	-0.220049	0.430671	0.949803	6.2405e-08	-0.729754	0.00201375	-0.450932	0.0916015	-0.992421	3.1842e-13	0.473865	0.074359	-0.0952966	0.735489
Rgs2	blue	0.941274	-0.377487	0.50703	0.211154	1075.67	966.443	109.231	857.212	0.145576	0.604686	-0.875276	1.92574e-05	0.7297	0.0020161	0.50703	0.0537259	0.941274	1.69512e-07	-0.377487	0.165401	0.211154	0.449992
2310046K01Rik	blue	0.956799	-0.423808	0.469585	0.140429	1157.69	1061.5	96.1967	965.301	0.175308	0.532016	-0.904887	3.56071e-06	0.729579	0.00202132	0.469585	0.077384	0.956799	2.39286e-08	-0.423808	0.115424	0.140429	0.617651
Palb2	blue	0.960525	-0.40532	0.502168	0.047174	1193.21	1082.29	110.912	971.381	0.165174	0.556344	-0.894553	6.78513e-06	0.729379	0.00202995	0.502168	0.0564516	0.960525	1.34348e-08	-0.40532	0.133921	0.047174	0.867413
Fam46b	blue	0.608173	0.0298217	0.639553	0.0260122	301.265	143.676	157.59	-13.9138	-0.2533	0.362348	-0.475141	0.0734735	0.728441	0.00207097	0.639553	0.0102465	0.608173	0.0161509	0.0298217	0.915978	0.0260122	0.926683
Jrk	blue	0.97093	-0.452721	0.462195	0.0270268	1258.81	1161.33	97.482	1063.84	0.20302	0.468028	-0.931395	4.54595e-07	0.728375	0.00207386	0.462195	0.0828136	0.97093	1.88542e-09	-0.452721	0.0901639	0.0270268	0.92383
Slc10a2	blue	0.750854	-0.157178	0.541015	0.0777266	436.301	323.417	112.884	210.534	-0.0489853	0.862366	-0.679383	0.00534009	0.728368	0.00207416	0.541015	0.0372898	0.750854	0.00125555	-0.157178	0.575866	0.0777266	0.78306
Hes1	blue	0.912196	-0.361521	0.514758	-0.0832538	924.381	818.082	106.299	711.783	0.124152	0.659331	-0.852387	5.43488e-05	0.728235	0.00208003	0.514758	0.0495935	0.912196	2.15604e-06	-0.361521	0.185499	-0.0832538	0.76801
Gm4354	blue	0.931505	-0.386581	0.464011	0.0328919	1024.8	932.821	91.9761	840.845	0.139095	0.621028	-0.867089	2.85198e-05	0.727993	0.00209075	0.464011	0.0814548	0.931505	4.50018e-07	-0.386581	0.154625	0.0328919	0.907361
Casc5	blue	0.683208	-0.0224374	0.639015	0.420673	393.969	230.457	163.512	66.9455	-0.181919	0.516406	-0.545991	0.0352426	0.72791	0.00209443	0.639015	0.010331	0.683208	0.00499096	-0.0224374	0.936739	0.420673	0.118428
Mypop	blue	0.952951	-0.419666	0.485522	0.0402064	1138.69	1036.57	102.119	934.455	0.163204	0.561127	-0.890513	8.57668e-06	0.727309	0.00212128	0.485522	0.06655	0.952951	4.12807e-08	-0.419666	0.119404	0.0402064	0.88687
Parvb	blue	0.860918	-0.211306	0.586485	0.132172	804.82	654.937	149.882	505.055	0.00018461	0.999479	-0.727468	0.00211417	0.727283	0.00212245	0.586485	0.0215615	0.860918	3.77142e-05	-0.211306	0.449657	0.132172	0.63867
Lipo4	blue	0.779805	-0.130443	0.62237	0.220306	594.207	412.803	181.404	231.399	-0.0926695	0.74255	-0.634306	0.0110931	0.726975	0.00213632	0.62237	0.0132216	0.779805	0.000606921	-0.130443	0.643104	0.220306	0.430119
Cyp4a14	blue	-0.79291	0.144267	-0.574061	-0.0310127	552.3	427.676	124.624	303.051	0.0656626	0.816152	0.660639	0.00733967	-0.726301	0.00216693	-0.574061	0.0252289	-0.79291	0.000421434	0.144267	0.607975	-0.0310127	0.912634
Smurf1	blue	0.982705	-0.446837	0.454371	0.0823661	1336.61	1239.74	96.8732	1142.87	0.200757	0.47311	-0.926858	6.81661e-07	0.726102	0.00217607	0.454371	0.088852	0.982705	6.6339e-11	-0.446837	0.0949538	0.0823661	0.770422
Spry4	blue	0.790974	-0.133995	0.633411	0.227328	655.016	450.791	204.225	246.566	-0.0841874	0.765475	-0.641609	0.00992905	0.725796	0.00219012	0.633411	0.0112429	0.790974	0.000445473	-0.133995	0.634008	0.227328	0.415182
Zfp626	blue	0.951355	-0.40655	0.488005	0.0260669	1129.05	1029.28	99.7655	929.519	0.164462	0.558068	-0.890056	8.80219e-06	0.725593	0.00219947	0.488005	0.0649667	0.951355	5.10788e-08	-0.40655	0.132631	0.0260669	0.926529
Gimap1	blue	0.989052	-0.460472	0.450255	0.0998514	1388.08	1290.02	98.0524	1191.97	0.215549	0.440392	-0.941082	1.73063e-07	0.725533	0.00220225	0.450255	0.0921506	0.989052	3.44881e-12	-0.460472	0.0841178	0.0998514	0.723294
Gm813	blue	0.617781	0.106249	0.712821	0.195973	482.892	199.652	283.241	-83.5887	-0.304273	0.270194	-0.421036	0.118078	0.725309	0.00221265	0.712821	0.00285691	0.617781	0.0141193	0.106249	0.706269	0.195973	0.483934
Zfp652	blue	0.980882	-0.465481	0.437279	0.0892512	1325.14	1232.36	92.7858	1139.57	0.214258	0.443202	-0.939511	2.04577e-07	0.725253	0.00221524	0.437279	0.103112	0.980882	1.267e-10	-0.465481	0.0803674	0.0892512	0.751766
Fam48a	blue	0.968722	-0.448211	0.441274	0.0647511	1243.09	1152.72	90.3738	1062.35	0.198892	0.477316	-0.923578	8.99331e-07	0.724686	0.00224172	0.441274	0.0996454	0.968722	3.01862e-09	-0.448211	0.0938202	0.0647511	0.818664
Fam78a	blue	0.930553	-0.391917	0.502071	0.157376	1015.46	908.935	106.522	802.413	0.138677	0.62209	-0.863286	3.39327e-05	0.724609	0.00224533	0.502071	0.0565069	0.930553	4.91085e-07	-0.391917	0.148525	0.157376	0.575379
Lrdd	blue	0.990849	-0.479051	0.448315	0.0619449	1396.08	1298.74	97.3362	1201.4	0.225194	0.419693	-0.949729	6.29979e-08	0.724535	0.00224883	0.448315	0.0937348	0.990849	1.07999e-12	-0.479051	0.0708079	0.0619449	0.82641
2610319H10Rik	blue	0.936654	-0.381349	0.519269	0.198601	1064.92	946.244	118.675	827.569	0.135445	0.630308	-0.859884	3.94717e-05	0.724439	0.00225334	0.519269	0.0472923	0.936654	2.74215e-07	-0.381349	0.160766	0.198601	0.477973
1700029J07Rik	blue	0.900852	-0.33227	0.542517	0.054588	893.685	768.573	125.112	643.462	0.089242	0.751791	-0.813657	0.000223879	0.724415	0.0022545	0.542517	0.0366628	0.900852	4.61808e-06	-0.33227	0.226283	0.054588	0.846787
Cyth4	blue	0.986874	-0.458619	0.45118	0.0908766	1373.47	1275.71	97.7523	1177.96	0.214475	0.44273	-0.938363	2.30516e-07	0.723888	0.00227942	0.45118	0.0914018	0.986874	1.11598e-11	-0.458619	0.085536	0.0908766	0.74738
C430048L16Rik	blue	0.973682	-0.44324	0.476029	0.161355	1269.39	1168.02	101.366	1066.66	0.202914	0.468267	-0.926588	6.97714e-07	0.723674	0.00228962	0.476029	0.072862	0.973682	9.94351e-10	-0.44324	0.0979695	0.161355	0.565632
Glp2r	blue	0.775088	-0.150998	0.575183	-0.161435	486.44	365.497	120.943	244.554	-0.0680776	0.809502	-0.655127	0.0080274	0.723205	0.00231213	0.575183	0.0248794	0.775088	0.000688047	-0.150998	0.591146	-0.161435	0.565436
4921531C22Rik	blue	0.960418	-0.437688	0.456287	0.0578894	1176.42	1085.52	90.9009	994.622	0.186755	0.505123	-0.909871	2.54065e-06	0.723116	0.00231639	0.456287	0.0873455	0.960418	1.36705e-08	-0.437688	0.102754	0.0578894	0.837631
Nol3	blue	0.851369	-0.26329	0.55218	0.0629844	712.105	587.119	124.986	462.132	0.0119212	0.966366	-0.734825	0.00180468	0.722903	0.00232666	0.55218	0.032815	0.851369	5.66861e-05	-0.26329	0.343064	0.0629844	0.823539
Ccdc17	blue	0.871591	-0.269838	0.571542	0.223384	800.822	661.147	139.675	521.472	0.0434993	0.877667	-0.766324	0.00086212	0.722824	0.0023305	0.571542	0.0260267	0.871591	2.30556e-05	-0.269838	0.330744	0.223384	0.423538
Klra2	blue	0.850537	-0.240168	0.546314	0.180693	708.331	594.099	114.232	479.868	0.0253613	0.928513	-0.748058	0.00134007	0.722697	0.00233667	0.546314	0.0351128	0.850537	5.86574e-05	-0.240168	0.388582	0.180693	0.519286
Gpx8	blue	0.986187	-0.454115	0.451478	0.048775	1367.73	1269.76	97.9685	1171.79	0.211148	0.450004	-0.933811	3.62242e-07	0.722663	0.00233833	0.451478	0.0911615	0.986187	1.55189e-11	-0.454115	0.0890546	0.048775	0.862952
Zfp566	blue	0.978692	-0.471386	0.429985	0.0516911	1322.39	1229.9	92.4912	1137.41	0.222386	0.425666	-0.944762	1.14833e-07	0.722375	0.00235232	0.429985	0.109659	0.978692	2.55117e-10	-0.471386	0.0761004	0.0516911	0.854836
Pgp	blue	0.928795	-0.405064	0.437839	-0.0360127	1037.04	946.945	90.0916	856.853	0.16879	0.547608	-0.890748	8.46263e-06	0.721958	0.00237275	0.437839	0.102622	0.928795	5.75282e-07	-0.405064	0.13419	-0.0360127	0.898611
Gabrb2	blue	0.654471	-0.0381075	0.597361	0.166201	302.346	179.519	122.827	56.6923	-0.192895	0.490963	-0.528699	0.0427381	0.721593	0.00239072	0.597361	0.0186985	0.654471	0.00811252	-0.0381075	0.892744	0.166201	0.553857
5730409E04Rik	blue	0.850423	-0.297651	0.513376	-0.0105063	665.536	569.394	96.1418	473.253	0.0386693	0.891171	-0.760039	0.00100766	0.72137	0.00240179	0.513376	0.0503149	0.850423	5.89322e-05	-0.297651	0.281279	-0.0105063	0.970356
Lgals2	blue	0.883378	-0.340944	0.49296	-0.144115	777.626	689.233	88.3932	600.84	0.0993416	0.724656	-0.820525	0.000178508	0.721183	0.00241104	0.49296	0.0618881	0.883378	1.27002e-05	-0.340944	0.213649	-0.144115	0.608357
Coro1c	blue	0.963093	-0.448073	0.431043	0.0417652	1225.5	1134.84	90.657	1044.18	0.20383	0.466216	-0.924825	8.10582e-07	0.720995	0.00242045	0.431043	0.108692	0.963093	8.72994e-09	-0.448073	0.0939335	0.0417652	0.882512
Serpinb6a	blue	0.955761	-0.38895	0.488771	0.15058	1176.29	1072.97	103.321	969.648	0.159491	0.570189	-0.880092	1.50897e-05	0.720601	0.00244018	0.488771	0.0644837	0.955761	2.78505e-08	-0.38895	0.151896	0.15058	0.592186
Gm5150	blue	0.861954	-0.261642	0.53636	0.15355	745.849	636.469	109.38	527.09	0.0486948	0.863175	-0.769281	0.000799798	0.720586	0.00244091	0.53636	0.0392842	0.861954	3.60198e-05	-0.261642	0.346203	0.15355	0.584817
Irgq	blue	-0.990883	0.471398	-0.456667	-0.0842623	1392.28	1292.87	99.4156	1193.45	-0.225016	0.420071	0.945578	1.04444e-07	-0.720563	0.00244209	-0.456667	0.087049	-0.990883	1.05406e-12	0.471398	0.0760918	-0.0842623	0.765272
Jam3	blue	0.935216	-0.385883	0.460907	0.102297	1057.25	964.893	92.361	872.532	0.155465	0.580084	-0.875938	1.86332e-05	0.720473	0.0024466	0.460907	0.0837872	0.935216	3.16162e-07	-0.385883	0.155434	0.102297	0.716773
Wdr73	blue	0.966852	-0.464281	0.435291	-0.00164929	1228.75	1140	88.7482	1051.26	0.212155	0.447795	-0.932512	4.09712e-07	0.720357	0.00245246	0.435291	0.104869	0.966852	4.38298e-09	-0.464281	0.0812547	-0.00164929	0.995346
Errfi1	blue	-0.897291	0.361275	-0.470253	0.0403917	822.984	741.868	81.1164	660.751	-0.11488	0.683505	0.834619	0.000108752	-0.719739	0.00248379	-0.470253	0.0769063	-0.897291	5.75751e-06	0.361275	0.18582	0.0403917	0.886352
Slc35c1	blue	0.987657	-0.488285	0.428957	0.0552732	1377.32	1284.86	92.462	1192.39	0.237368	0.394303	-0.956464	2.51393e-08	0.719097	0.00251669	0.428957	0.110604	0.987657	7.4957e-12	-0.488285	0.0647893	0.0552732	0.844885
Rad9	blue	0.994261	-0.490919	0.430674	0.0541787	1424.96	1330.32	94.6374	1235.68	0.239941	0.389043	-0.958898	1.73984e-08	0.718957	0.00252388	0.430674	0.109029	0.994261	5.24774e-14	-0.490919	0.0631433	0.0541787	0.847923
Gm6583	blue	0.616981	0.0686539	0.664531	-0.0555847	343.983	159.945	184.038	-24.0931	-0.258163	0.352888	-0.460727	0.0839234	0.71889	0.00252734	0.664531	0.00688259	0.616981	0.0142804	0.0686539	0.807917	-0.0555847	0.844021
Tubb1	blue	0.791625	-0.200504	0.568292	0.0922925	521.835	402.81	119.025	283.785	-0.0285367	0.919588	-0.690151	0.00440365	0.718688	0.00253779	0.568292	0.0270843	0.791625	0.000437268	-0.200504	0.473679	0.0922925	0.743565
Ankrd49	blue	0.985792	-0.474093	0.43545	0.126365	1357.17	1265.36	91.8181	1173.54	0.226631	0.416654	-0.944857	1.13574e-07	0.718226	0.00256181	0.43545	0.104727	0.985792	1.86183e-11	-0.474093	0.0741998	0.126365	0.653605
2810021B07Rik	blue	0.977077	-0.486359	0.42912	-0.0109655	1295.93	1206.88	89.0497	1117.83	0.230232	0.409086	-0.94778	8.02866e-08	0.717548	0.00259745	0.42912	0.110454	0.977077	4.0861e-10	-0.486359	0.0660132	-0.0109655	0.969061
Faim	blue	0.9897	-0.481302	0.434597	0.0872405	1385.46	1292.11	93.3481	1198.76	0.232399	0.404566	-0.949371	6.59105e-08	0.716973	0.00262798	0.434597	0.105487	0.9897	2.32301e-12	-0.481302	0.069305	0.0872405	0.757201
Ccdc164	blue	0.963657	-0.430792	0.482029	0.124009	1201.2	1100.86	100.337	1000.53	0.178345	0.52482	-0.895293	6.49336e-06	0.716948	0.00262929	0.482029	0.0688245	0.963657	7.91022e-09	-0.430792	0.108921	0.124009	0.659702
Lag3	blue	0.937699	-0.40643	0.483892	0.0947086	1042.46	946.669	95.7952	850.874	0.169588	0.545689	-0.886475	1.07444e-05	0.716887	0.00263254	0.483892	0.0676047	0.937699	2.46749e-07	-0.40643	0.132757	0.0947086	0.737068
Gm6507	blue	0.832046	-0.307928	0.478078	-0.100815	589.074	508.991	80.0829	428.908	0.0645711	0.819161	-0.781231	0.000584002	0.71666	0.00264471	0.478078	0.0714645	0.832046	0.000119447	-0.307928	0.264189	-0.100815	0.720723
Nr2c2ap	blue	0.983499	-0.481012	0.441799	0.082847	1334.82	1240.75	94.0627	1146.69	0.230743	0.408016	-0.947385	8.42317e-08	0.716642	0.00264566	0.441799	0.0991957	0.983499	4.89728e-11	-0.481012	0.069497	0.082847	0.769115
Prune	blue	0.969538	-0.439195	0.481507	0.164474	1239.19	1136.85	102.339	1034.51	0.195075	0.48598	-0.911713	2.23166e-06	0.716638	0.00264587	0.481507	0.0691693	0.969538	2.54708e-09	-0.439195	0.10144	0.164474	0.55804
Mknk2	blue	0.951051	-0.43639	0.43799	-0.0650941	1117.88	1033.78	84.0982	949.684	0.191015	0.495277	-0.907194	3.05272e-06	0.716179	0.00267058	0.43799	0.102489	0.951051	5.31498e-08	-0.43639	0.103895	-0.0650941	0.817719
9430015G10Rik	blue	0.961436	-0.440864	0.460438	0.0860696	1181.27	1091.23	90.0341	1001.2	0.189232	0.499387	-0.904954	3.54497e-06	0.715722	0.00269534	0.460438	0.0841435	0.961436	1.15687e-08	-0.440864	0.099997	0.0860696	0.760371
Podxl	blue	0.909348	-0.319861	0.517276	0.129096	932.384	825.586	106.797	718.789	0.0921639	0.743911	-0.807193	0.000274812	0.715029	0.00273322	0.517276	0.0482995	0.909348	2.63465e-06	-0.319861	0.245154	0.129096	0.646566
Ddx26b	blue	0.993464	-0.484618	0.436206	0.0982775	1411.16	1317.65	93.5134	1224.13	0.236295	0.396508	-0.951252	5.17705e-08	0.714957	0.0027372	0.436206	0.104058	0.993464	1.21896e-13	-0.484618	0.0671331	0.0982775	0.727501
Otop3	blue	0.588059	0.0660293	0.661746	-0.132183	303.365	130.902	172.463	-41.5604	-0.25456	0.359883	-0.459761	0.0846599	0.714321	0.00277241	0.661746	0.00720723	0.588059	0.0211279	0.0660293	0.815141	-0.132183	0.638642
Nck2	blue	0.970674	-0.453079	0.431466	0.07959	1253.9	1167.66	86.2437	1081.41	0.20944	0.453763	-0.923512	9.0425e-07	0.714071	0.00278633	0.431466	0.108307	0.970674	1.99494e-09	-0.453079	0.0898782	0.07959	0.777978
Fut10	blue	0.960918	-0.433954	0.470285	0.0593801	1180.48	1084.99	95.4916	989.498	0.199833	0.47519	-0.913281	1.99403e-06	0.713448	0.00282136	0.470285	0.0768837	0.960918	1.26013e-08	-0.433954	0.106062	0.0593801	0.833503
BC051628	blue	0.648074	0.0301552	0.640618	0.294031	352.031	194.664	157.367	37.2975	-0.227707	0.414384	-0.485645	0.0664706	0.713352	0.00282674	0.640618	0.0100812	0.648074	0.00898005	0.0301552	0.915042	0.294031	0.287453
Arv1	blue	0.984656	-0.467377	0.454765	0.119095	1335.7	1239.69	96.0042	1143.69	0.216047	0.439312	-0.929327	5.48609e-07	0.713281	0.00283079	0.454765	0.0885405	0.984656	3.06244e-11	-0.467377	0.0789788	0.119095	0.672478
Pygo2	blue	0.983312	-0.488978	0.424798	0.0555982	1343.98	1255.22	88.7574	1166.46	0.240462	0.387983	-0.953543	3.80716e-08	0.713081	0.00284209	0.424798	0.114486	0.983312	5.2676e-11	-0.488978	0.0643536	0.0555982	0.843983
N4bp3	blue	0.98847	-0.464853	0.443947	0.0690733	1372.93	1279.41	93.5193	1185.89	0.223222	0.423884	-0.936292	2.84322e-07	0.71307	0.00284275	0.443947	0.097371	0.98847	4.821e-12	-0.464853	0.0808307	0.0690733	0.806764
Pigh	blue	0.989916	-0.494967	0.434355	0.101141	1382.71	1290.6	92.1078	1198.49	0.239	0.390962	-0.951946	4.72451e-08	0.712946	0.0028498	0.434355	0.105704	0.989916	2.02474e-12	-0.494967	0.0606718	0.101141	0.719852
Exoc8	blue	0.975698	-0.455611	0.46848	0.150598	1277.33	1178.57	98.7631	1079.81	0.212624	0.44677	-0.925346	7.75726e-07	0.712723	0.00286249	0.46848	0.0781796	0.975698	5.95349e-10	-0.455611	0.0878743	0.150598	0.592142
Pcdhb6	blue	0.939764	-0.38701	0.470902	0.127366	1051.86	962.823	89.0394	873.783	0.155565	0.579839	-0.868148	2.71467e-05	0.712583	0.00287048	0.470902	0.0764444	0.939764	1.99191e-07	-0.38701	0.154128	0.127366	0.651024
Gatsl3	blue	0.98514	-0.466944	0.461853	0.124618	1342.08	1243.86	98.2125	1145.65	0.220999	0.428633	-0.933528	3.72187e-07	0.712529	0.0028736	0.461853	0.0830716	0.98514	2.48841e-11	-0.466944	0.0792943	0.124618	0.658123
Recql	blue	0.983201	-0.487477	0.427012	0.0544256	1332.91	1243.86	89.0515	1154.81	0.233228	0.402844	-0.945441	1.06132e-07	0.712213	0.0028917	0.427012	0.112408	0.983201	5.4979e-11	-0.487477	0.0653009	0.0544256	0.847238
Wdr76	blue	0.845558	-0.317212	0.476374	0.0928806	614.321	540.207	74.1149	466.092	0.0780482	0.782182	-0.790101	0.00045666	0.712053	0.00290092	0.476374	0.0726249	0.845558	7.16713e-05	-0.317212	0.249306	0.0928806	0.741982
Mest	blue	0.995147	-0.477691	0.44681	0.0800165	1420.52	1324.66	95.8567	1228.81	0.232567	0.404216	-0.944255	1.21709e-07	0.711688	0.00292208	0.44681	0.0949763	0.995147	1.76836e-14	-0.477691	0.0717267	0.0800165	0.776815
Etaa1	blue	0.989677	-0.481806	0.445186	0.108485	1379.82	1285.49	94.3308	1191.15	0.236633	0.395811	-0.948184	7.64124e-08	0.71155	0.00293006	0.445186	0.0963303	0.989677	2.35714e-12	-0.481806	0.0689716	0.108485	0.700349
Syne2	blue	-0.984006	0.488057	-0.440526	-0.112015	1336.37	1244.02	92.346	1151.68	-0.233305	0.402684	0.944778	1.14614e-07	-0.711473	0.00293453	-0.440526	0.100288	-0.984006	4.00309e-11	0.488057	0.0649336	-0.112015	0.691035
LOC100046456	blue	0.87367	-0.305824	0.552456	0.13531	807.422	667.378	140.043	527.335	0.0690476	0.806835	-0.780202	0.000600475	0.711154	0.00295316	0.552456	0.0327099	0.87367	2.08437e-05	-0.305824	0.267635	0.13531	0.630652
Stx1a	blue	0.863384	-0.325017	0.486492	0.174915	688.109	607.972	80.1372	527.835	0.0942202	0.73838	-0.805182	0.000292465	0.710962	0.00296442	0.486492	0.065928	0.863384	3.37842e-05	-0.325017	0.237199	0.174915	0.532951
Zbtb26	blue	0.754306	-0.150534	0.609594	0.189695	518.847	338.207	180.64	157.567	-0.0695066	0.805573	-0.640905	0.0100368	0.710412	0.00299685	0.609594	0.015837	0.754306	0.00115719	-0.150534	0.592302	0.189695	0.498319
Zfp668	blue	0.937409	-0.42659	0.427864	0.036332	1073.45	988.838	84.6165	904.221	0.194137	0.48812	-0.904491	3.6544e-06	0.710354	0.00300028	0.427864	0.111616	0.937409	2.54121e-07	-0.42659	0.112802	0.036332	0.897716
4930524J08Rik	blue	0.906277	-0.365559	0.510638	0.185711	891.906	788.377	103.528	684.849	0.13715	0.625967	-0.847477	6.63991e-05	0.710327	0.00300188	0.510638	0.0517665	0.906277	3.24693e-06	-0.365559	0.180273	0.185711	0.507549
1600012H06Rik	blue	0.985218	-0.478354	0.440717	0.0391923	1347.19	1255.47	91.7187	1163.75	0.235273	0.398613	-0.945525	1.05104e-07	0.710251	0.00300637	0.440717	0.100123	0.985218	2.40573e-11	-0.478354	0.071278	0.0391923	0.889707
Trim65	blue	0.914804	-0.396664	0.488415	0.113159	925.427	830.616	94.8113	735.804	0.149398	0.595129	-0.859626	3.99195e-05	0.710228	0.00300775	0.488415	0.0647077	0.914804	1.78375e-06	-0.396664	0.143235	0.113159	0.688026
Pilrb1	blue	0.87232	-0.266505	0.520029	0.184706	796.063	690.34	105.723	584.616	0.0578402	0.837768	-0.767911	0.000828199	0.710071	0.00301711	0.520029	0.0469128	0.87232	2.22585e-05	-0.266505	0.336982	0.184706	0.509888
Rbms2	blue	0.993037	-0.490581	0.431496	0.0597693	1406	1313.96	92.0403	1221.92	0.243498	0.381834	-0.953375	3.89623e-08	0.709876	0.0030287	0.431496	0.10828	0.993037	1.83797e-13	-0.490581	0.0633524	0.0597693	0.832426
9030425E11Rik	blue	0.984217	-0.468847	0.4438	0.022904	1330.36	1239.71	90.6456	1149.07	0.215939	0.439547	-0.925691	7.53368e-07	0.709753	0.00303609	0.4438	0.0974958	0.984217	3.6749e-11	-0.468847	0.0779149	0.022904	0.935425
Zfp553	blue	0.979985	-0.478547	0.432511	0.08554	1318.33	1228.07	90.2612	1137.8	0.239437	0.390071	-0.94916	6.76886e-08	0.709723	0.00303788	0.432511	0.10736	0.979985	1.70319e-10	-0.478547	0.071147	0.08554	0.761806
Cdk2ap2	blue	0.975371	-0.493128	0.41475	-0.0114141	1281.75	1197.07	84.6745	1112.4	0.237573	0.393882	-0.946804	9.03407e-08	0.709231	0.00306745	0.41475	0.124251	0.975371	6.48728e-10	-0.493128	0.0617854	-0.0114141	0.967796
Mkrn3	blue	0.876736	-0.304799	0.539273	0.253378	781.719	664.299	117.42	546.879	0.0745386	0.791773	-0.783057	0.000555666	0.708519	0.00311064	0.539273	0.0380272	0.876736	1.79041e-05	-0.304799	0.269326	0.253378	0.362195
Strada	blue	0.997171	-0.496948	0.429581	0.0957731	1433.73	1341.6	92.13	1249.47	0.244089	0.380645	-0.952374	4.46237e-08	0.708285	0.00312494	0.429581	0.11003	0.997171	5.3254e-16	-0.496948	0.0594887	0.0957731	0.734211
Hspb2	blue	0.983606	-0.47966	0.439144	0.0665503	1331.24	1241.26	89.9836	1151.28	0.227878	0.414025	-0.936114	2.89386e-07	0.708236	0.00312792	0.439144	0.101483	0.983606	4.69576e-11	-0.47966	0.0703987	0.0665503	0.813706
Fam69b	blue	0.904718	-0.355192	0.465105	0.0468406	881.86	797.118	84.7414	712.377	0.12428	0.658999	-0.832164	0.000118938	0.707884	0.00314958	0.465105	0.0806441	0.904718	3.60046e-06	-0.355192	0.193885	0.0468406	0.868343
Cacng6	blue	0.827532	-0.245672	0.571048	0.172084	679.232	521.483	157.749	363.734	0.00814021	0.977031	-0.715896	0.00268587	0.707756	0.00315744	0.571048	0.0261854	0.827532	0.00014029	-0.245672	0.377465	0.172084	0.539704
Cul9	blue	0.930073	-0.402075	0.471173	0.242333	990.549	903.774	86.7756	816.998	0.147936	0.598778	-0.854863	4.89967e-05	0.706927	0.00320898	0.471173	0.0762517	0.930073	5.13e-07	-0.402075	0.137363	0.242333	0.384188
Cyp4a12b	blue	0.573417	0.0923537	0.652264	0.070613	287.125	129.095	158.03	-28.9354	-0.305079	0.268863	-0.4018	0.137657	0.706879	0.00321194	0.652264	0.00840405	0.573417	0.0254312	0.0923537	0.7434	0.070613	0.802534
Tmem159	blue	0.986807	-0.478196	0.436894	-0.00151135	1352.46	1262.72	89.742	1172.98	0.23146	0.406521	-0.93783	2.43455e-07	0.70637	0.00324392	0.436894	0.103451	0.986807	1.15325e-11	-0.478196	0.0713844	-0.00151135	0.995735
C630004H02Rik	blue	0.989896	-0.498886	0.425343	0.069331	1381.88	1290.44	91.4493	1198.99	0.250138	0.368573	-0.956394	2.54014e-08	0.706255	0.00325117	0.425343	0.113972	0.989896	2.05132e-12	-0.498886	0.0583473	0.069331	0.806056
Tomm40l	blue	0.974496	-0.480718	0.432606	0.0309374	1265.43	1178.27	87.1608	1091.11	0.233703	0.40186	-0.93976	1.99282e-07	0.706057	0.00326371	0.432606	0.107274	0.974496	8.12415e-10	-0.480718	0.0696923	0.0309374	0.912846
Tshz3	blue	0.944477	-0.389878	0.498863	0.193692	1087.17	985.496	101.677	883.819	0.161178	0.566063	-0.866911	2.8756e-05	0.705732	0.00328436	0.498863	0.0583612	0.944477	1.1865e-07	-0.389878	0.150836	0.193692	0.489138
Dvl2	blue	0.987627	-0.486066	0.431005	0.0222657	1364.06	1274.84	89.2211	1185.62	0.241743	0.385383	-0.947117	8.70081e-08	0.705374	0.00330724	0.431005	0.108727	0.987627	7.61289e-12	-0.486066	0.0662007	0.0222657	0.937222
Lpl	blue	0.789823	-0.166633	0.536102	-0.00174119	552.266	443.014	109.252	333.761	-0.0318201	0.910368	-0.673347	0.00592987	0.705167	0.0033205	0.536102	0.0393972	0.789823	0.000460282	-0.166633	0.552812	-0.00174119	0.995086
Hoxa1	blue	0.901144	-0.330418	0.505387	0.0897687	876.202	779.265	96.9372	682.328	0.10365	0.713172	-0.80881	0.000261264	0.70516	0.00332098	0.505387	0.0546359	0.901144	4.53371e-06	-0.330418	0.229039	0.0897687	0.750369
Cdan1	blue	0.972492	-0.478614	0.445651	0.0638534	1257.06	1165.86	91.1944	1074.67	0.223847	0.422554	-0.928186	6.07117e-07	0.704339	0.00337408	0.445651	0.0959412	0.972492	1.32196e-09	-0.478614	0.0711019	0.0638534	0.821141
Gltp	blue	0.954506	-0.441543	0.434676	0.18856	1138.67	1056.49	82.1827	974.303	0.205033	0.463533	-0.909054	2.68872e-06	0.704021	0.00339482	0.434676	0.105416	0.954506	3.33054e-08	-0.441543	0.0994146	0.18856	0.50094
Golga1	blue	0.978649	-0.49852	0.424716	0.0907641	1299.28	1212.68	86.5973	1126.08	0.239916	0.389095	-0.943661	1.30201e-07	0.703745	0.00341291	0.424716	0.114563	0.978649	2.58405e-10	-0.49852	0.0585617	0.0907641	0.747683
Samd5	blue	0.929464	-0.425562	0.426261	0.0512197	1003.12	926.969	76.1553	850.813	0.185688	0.507602	-0.889339	9.16559e-06	0.703651	0.00341913	0.426261	0.11311	0.929464	5.41902e-07	-0.425562	0.113766	0.0512197	0.856147
Cyb561d1	blue	0.987849	-0.500879	0.420274	0.0490378	1363.71	1275.6	88.1111	1187.49	0.252708	0.36351	-0.955731	2.79735e-08	0.703023	0.00346059	0.420274	0.118815	0.987849	6.77318e-12	-0.500879	0.0571907	0.0490378	0.86222
Fbxw15	blue	0.742121	-0.150225	0.574091	-0.0592167	428.803	303.861	124.942	178.919	-0.0782894	0.781524	-0.624555	0.0128101	0.702844	0.00347249	0.574091	0.0252195	0.742121	0.0015348	-0.150225	0.593069	-0.0592167	0.833955
Ptprm	blue	0.626585	-0.0067993	0.613022	-0.170075	282.055	154.264	127.791	26.4732	-0.187736	0.502846	-0.514598	0.0496769	0.702334	0.00350661	0.613022	0.0150991	0.626585	0.0124368	-0.0067993	0.980814	-0.170075	0.544518
Hist1h1c	blue	0.927015	-0.428381	0.454329	0.0250398	979.003	897.023	81.9798	815.043	0.174794	0.533239	-0.876654	1.79777e-05	0.70186	0.00353851	0.454329	0.0888849	0.927015	6.72505e-07	-0.428381	0.111136	0.0250398	0.929417
Abcg1	blue	0.978244	-0.453527	0.445977	0.155522	1294.14	1205.59	88.5529	1117.04	0.22018	0.43039	-0.921872	1.03374e-06	0.701692	0.00354991	0.445977	0.0956693	0.978244	2.91731e-10	-0.453527	0.0895211	0.155522	0.579944
Olfr1032	blue	0.873244	-0.315112	0.501902	0.157208	730.461	642.616	87.8451	554.771	0.0997166	0.723654	-0.800924	0.000332919	0.701207	0.00358289	0.501902	0.0566036	0.873244	2.1282e-05	-0.315112	0.252625	0.157208	0.575794
Rgs10	blue	0.962926	-0.428811	0.466803	0.100549	1188.25	1096.18	92.0659	1004.11	0.192234	0.492476	-0.893123	7.37945e-06	0.700889	0.00360467	0.466803	0.0793972	0.962926	8.98727e-09	-0.428811	0.110739	0.100549	0.721433
Nsun6	blue	0.985304	-0.481686	0.4414	0.145937	1336.63	1245.98	90.648	1155.33	0.235653	0.39783	-0.936501	2.78436e-07	0.700849	0.00360743	0.4414	0.0995371	0.985304	2.31623e-11	-0.481686	0.0690508	0.145937	0.603782
9130219A07Rik	blue	0.692231	-0.109583	0.492861	-0.136483	352.82	249.825	102.995	146.829	-0.0753434	0.789571	-0.624791	0.0127662	0.700134	0.00365675	0.492861	0.0619489	0.692231	0.00423886	-0.109583	0.697449	-0.136483	0.627663
Glis2	blue	0.989325	-0.496706	0.42527	0.0621198	1365.82	1277.98	87.8363	1190.15	0.242007	0.384847	-0.942106	1.54815e-07	0.700099	0.00365921	0.42527	0.114041	0.989325	2.92866e-12	-0.496706	0.0596322	0.0621198	0.825927
1700022N22Rik	blue	0.940761	-0.423133	0.468716	0.178506	1050.85	961.306	89.5457	871.76	0.172827	0.537928	-0.872027	2.25761e-05	0.6992	0.00372201	0.468716	0.0780093	0.940761	1.7915e-07	-0.423133	0.116066	0.178506	0.524439
2610039C10Rik	blue	0.992949	-0.49494	0.420365	0.0854801	1402.34	1314.43	87.9182	1226.51	0.251566	0.365754	-0.950706	5.55877e-08	0.699139	0.00372631	0.420365	0.118727	0.992949	1.99379e-13	-0.49494	0.0606884	0.0854801	0.761969
Ppp1r13l	blue	0.987472	-0.497184	0.412387	0.0384827	1366.09	1279.87	86.2219	1193.65	0.253928	0.361118	-0.951799	4.81752e-08	0.69787	0.00381655	0.412387	0.126627	0.987472	8.25212e-12	-0.497184	0.0593488	0.0384827	0.891693
Ear1	blue	-0.615268	0.0810571	-0.539963	0.0850126	212.459	130.15	82.3094	47.8404	0.158397	0.572871	0.539305	0.0380135	-0.697702	0.00382864	-0.539963	0.0377336	-0.615268	0.0146303	0.0810571	0.773982	0.0850126	0.763236
Apba1	blue	0.853292	-0.356492	0.464821	-0.0747534	629.963	560.001	69.9618	490.039	0.106341	0.706025	-0.803835	0.0003048	0.697494	0.00384364	0.464821	0.0808544	0.853292	5.23394e-05	-0.356492	0.192143	-0.0747534	0.791185
Xkr8	blue	0.987151	-0.495166	0.431254	0.0890775	1351.26	1261.59	89.6702	1171.92	0.24997	0.368907	-0.947301	8.50911e-08	0.697332	0.00385537	0.431254	0.1085	0.987151	9.72033e-12	-0.495166	0.0605522	0.0890775	0.752235
5033406O09Rik	blue	0.994545	-0.505718	0.4189	0.110768	1415.95	1327.32	88.6284	1238.7	0.26134	0.346781	-0.958668	1.80332e-08	0.697327	0.0038557	0.4189	0.120151	0.994545	3.77235e-14	-0.505718	0.0544518	0.110768	0.694321
2810416G20Rik	blue	0.831756	-0.298473	0.479063	0.180552	567.448	495.692	71.7553	423.937	0.0777495	0.782997	-0.77466	0.000695831	0.69691	0.00388597	0.479063	0.0707994	0.831756	0.000120702	-0.298473	0.279889	0.180552	0.519618
Klrg1	blue	0.798718	-0.183671	0.558388	0.318421	531.258	421.644	109.613	312.031	-0.0156847	0.955757	-0.681049	0.00518569	0.696734	0.00389883	0.558388	0.0305087	0.798718	0.000355605	-0.183671	0.512305	0.318421	0.247405
Hist3h2ba	blue	0.606236	0.0677358	0.636196	0.353782	305.715	155.423	150.292	5.13126	-0.245315	0.378181	-0.451283	0.0913185	0.696598	0.0039088	0.636196	0.0107821	0.606236	0.0165863	0.0677358	0.810443	0.353782	0.195787
Krtap16-7	blue	0.637159	0.0377904	0.657685	0.42109	364.255	187.253	177.002	10.2507	-0.214023	0.443713	-0.482562	0.0684738	0.696585	0.0039097	0.657685	0.00770223	0.637159	0.0106264	0.0377904	0.893631	0.42109	0.118026
B4galt2	blue	0.932584	-0.423651	0.46645	0.112298	1002.25	916.586	85.6605	830.925	0.176916	0.5282	-0.873346	2.1176e-05	0.69643	0.00392107	0.46645	0.0796557	0.932584	4.06964e-07	-0.423651	0.115573	0.112298	0.69029
Hic1	blue	0.966802	-0.458792	0.427338	0.0282716	1217.5	1134.38	83.118	1051.26	0.224392	0.421395	-0.9205	1.1537e-06	0.696108	0.00394476	0.427338	0.112105	0.966802	4.42541e-09	-0.458792	0.0854031	0.0282716	0.920332
Cend1	blue	0.57775	0.05004	0.648482	0.137343	293.373	118.718	174.654	-55.936	-0.251402	0.366078	-0.444644	0.0967844	0.696046	0.00394933	0.648482	0.00892263	0.57775	0.024094	0.05004	0.85943	0.137343	0.625475
Nedd4l	blue	-0.973701	0.503703	-0.398534	-0.104028	1258.05	1178.04	80.0115	1098.02	-0.249995	0.368857	0.945942	1.00078e-07	-0.695948	0.0039566	-0.398534	0.141187	-0.973701	9.8989e-10	0.503703	0.0555802	-0.104028	0.712165
Arl2	blue	0.992071	-0.508687	0.40819	0.0221357	1396.15	1310.78	85.3638	1225.42	0.260262	0.348847	-0.956169	2.62495e-08	0.695907	0.00395958	0.40819	0.130925	0.992071	4.26424e-13	-0.508687	0.0528191	0.0221357	0.937588
Slc29a2	blue	0.955223	-0.474067	0.421879	0.0304055	1138.05	1059.39	78.6644	980.721	0.228346	0.413039	-0.923987	8.69387e-07	0.69564	0.00397935	0.421879	0.117266	0.955223	3.00913e-08	-0.474067	0.0742184	0.0304055	0.914339
Cenpc1	blue	0.989632	-0.497559	0.423908	0.099905	1372.12	1284.33	87.7835	1196.55	0.253814	0.361341	-0.949377	6.5865e-08	0.695563	0.00398512	0.423908	0.115329	0.989632	2.42402e-12	-0.497559	0.0591273	0.099905	0.723151
Rnls	blue	0.959409	-0.482117	0.423144	0.09078	1161.4	1082.21	79.1849	1003.03	0.227348	0.415141	-0.922513	9.81373e-07	0.695165	0.00401473	0.423144	0.116055	0.959409	1.60609e-08	-0.482117	0.0687666	0.09078	0.74764
2210411K11Rik	blue	0.969089	-0.506346	0.398631	0.0340323	1231.97	1152.19	79.7848	1072.4	0.248438	0.371944	-0.943494	1.32671e-07	0.695056	0.00402293	0.398631	0.141081	0.969089	2.79836e-09	-0.506346	0.0541034	0.0340323	0.904162
Bcar1	blue	0.963908	-0.444345	0.450963	0.140398	1192.08	1105.89	86.1931	1019.69	0.207604	0.457821	-0.90207	4.27446e-06	0.694466	0.00406728	0.450963	0.0915766	0.963908	7.56552e-09	-0.444345	0.0970356	0.140398	0.617731
1600023N17Rik	blue	0.757848	-0.141744	0.611361	0.261372	532.712	355.375	177.337	178.037	-0.0665124	0.813811	-0.627757	0.012225	0.694269	0.00408214	0.611361	0.0154532	0.757848	0.00106284	-0.141744	0.614328	0.261372	0.34672
Rassf8	blue	0.959604	-0.46471	0.425819	0.0815035	1160.6	1082.27	78.3282	1003.94	0.22755	0.414715	-0.921342	1.07877e-06	0.693792	0.00411843	0.425819	0.113524	0.959604	1.55737e-08	-0.46471	0.0809367	0.0815035	0.772768
Axl	blue	0.8939	-0.319505	0.491426	0.143885	851.074	759.735	91.3389	668.396	0.113431	0.68731	-0.806977	0.000276665	0.693546	0.00413723	0.491426	0.0628297	0.8939	7.0515e-06	-0.319505	0.245711	0.143885	0.608935
Kcnj8	blue	0.981049	-0.494467	0.41904	0.138674	1311.89	1228.35	83.5361	1144.82	0.252146	0.364614	-0.9448	1.14322e-07	0.692655	0.0042059	0.41904	0.120015	0.981049	1.19744e-10	-0.494467	0.0609733	0.138674	0.622098
Mks1	blue	0.989179	-0.508507	0.411742	0.0920207	1372.71	1286.88	85.829	1201.05	0.260948	0.347532	-0.953401	3.88235e-08	0.692453	0.00422159	0.411742	0.127282	0.989179	3.19741e-12	-0.508507	0.052917	0.0920207	0.744297
Tcf7	blue	0.799213	-0.276256	0.466805	0.176734	493.224	421.831	71.3927	350.438	0.0601563	0.831355	-0.751556	0.00123502	0.6914	0.00430414	0.466805	0.0793957	0.799213	0.000350401	-0.276256	0.318917	0.176734	0.528631
Art2b	blue	0.816097	-0.216171	0.535031	0.225345	561.843	465.945	95.8978	370.047	0.0106323	0.970001	-0.702006	0.00352868	0.691374	0.0043062	0.535031	0.0398677	0.816097	0.000206788	-0.216171	0.439042	0.225345	0.419373
Ttf2	blue	0.993238	-0.505881	0.411101	0.0858237	1404.31	1318.02	86.2961	1231.72	0.263756	0.342178	-0.955008	3.10254e-08	0.691252	0.00431584	0.411101	0.127934	0.993238	1.52016e-13	-0.505881	0.0543608	0.0858237	0.761038
Il34	blue	-0.959697	0.493234	-0.407076	-0.0891612	1166.59	1087.1	79.4926	1007.6	-0.246299	0.376209	0.937427	2.53658e-07	-0.691128	0.00432568	-0.407076	0.132082	-0.959697	1.53455e-08	0.493234	0.0617211	-0.0891612	0.752009
Ccdc21	blue	0.915392	-0.432356	0.410594	0.0211757	912.893	846.11	66.7828	779.328	0.196662	0.482369	-0.887561	1.0121e-05	0.690899	0.00434382	0.410594	0.128451	0.915392	1.70777e-06	-0.432356	0.1075	0.0211757	0.94029
2900006K08Rik	blue	0.863373	-0.326252	0.495435	0.266699	680.291	596.757	83.5335	513.224	0.0971058	0.730638	-0.787887	0.000486092	0.690781	0.00435323	0.495435	0.0603907	0.863373	3.38002e-05	-0.326252	0.235318	0.266699	0.336618
Tox3	blue	0.741984	-0.172803	0.501717	-0.223089	348.844	280.83	68.0141	212.816	-0.0418461	0.882285	-0.64841	0.00893282	0.690256	0.00439527	0.501717	0.0567091	0.741984	0.00153957	-0.172803	0.537985	-0.223089	0.424168
Abcb9	blue	0.991114	-0.510715	0.414773	0.099347	1380.96	1294.01	86.9458	1207.07	0.261566	0.346349	-0.95175	4.84875e-08	0.690184	0.00440105	0.414773	0.124228	0.991114	8.92627e-13	-0.510715	0.051725	0.099347	0.724642
Nav2	blue	-0.966276	0.506351	-0.38266	-0.0171133	1233.48	1155.14	78.3367	1076.81	-0.259772	0.349788	0.949843	6.20947e-08	-0.690071	0.00441015	-0.38266	0.159211	-0.966276	4.89527e-09	0.506351	0.0541007	-0.0171133	0.951731
Chchd5	blue	0.988698	-0.508635	0.406595	0.0797471	1370.28	1286.35	83.9383	1202.41	0.265031	0.339764	-0.954409	3.37612e-08	0.689378	0.0044662	0.406595	0.132584	0.988698	4.23775e-12	-0.508635	0.0528477	0.0797471	0.77755
Prex1	blue	0.963108	-0.44389	0.44551	0.145875	1184.43	1101.1	83.3293	1017.77	0.20995	0.452639	-0.899198	5.12128e-06	0.689248	0.00447679	0.44551	0.0960587	0.963108	8.70756e-09	-0.44389	0.0974195	0.145875	0.603938
Jmjd7	blue	0.980945	-0.522147	0.396493	0.0997522	1314.19	1231.19	83.0051	1148.18	0.266897	0.336246	-0.955929	2.71831e-08	0.689032	0.00449444	0.396493	0.143423	0.980945	1.24057e-10	-0.522147	0.0458663	0.0997522	0.723559
Zfp518b	blue	0.977125	-0.504892	0.399161	0.0341157	1284.59	1205.28	79.308	1125.98	0.255861	0.357348	-0.943899	1.26739e-07	0.688038	0.00457631	0.399161	0.140505	0.977125	4.03089e-10	-0.504892	0.0549121	0.0341157	0.903928
Tpra1	blue	0.98071	-0.48424	0.436098	0.147143	1304.13	1216.76	87.3694	1129.39	0.239799	0.389332	-0.927641	6.36832e-07	0.687842	0.00459258	0.436098	0.104154	0.98071	1.34242e-10	-0.48424	0.0673782	0.147143	0.60076
Btbd3	blue	0.975628	-0.480447	0.442264	0.12647	1268.46	1178.99	89.464	1089.53	0.243087	0.382665	-0.930825	4.79049e-07	0.687739	0.00460118	0.442264	0.0987986	0.975628	6.06384e-10	-0.480447	0.0698727	0.12647	0.653334
1520402A15Rik	blue	0.801976	-0.239285	0.510413	0.069642	497.418	416.625	80.7931	335.832	0.0272966	0.923072	-0.714346	0.00277104	0.687049	0.00465887	0.510413	0.051887	0.801976	0.000322518	-0.239285	0.390382	0.069642	0.805201
Adcy7	blue	0.987733	-0.499972	0.412654	0.0947951	1361.57	1276.92	84.6526	1192.27	0.261753	0.345992	-0.948672	7.19364e-08	0.686919	0.00466987	0.412654	0.126358	0.987733	7.20259e-12	-0.499972	0.057715	0.0947951	0.736836
A130049A11Rik	blue	0.794138	-0.211543	0.525562	0.146768	521.708	428.525	93.1833	335.342	0.0133844	0.962241	-0.7002	0.00365217	0.686816	0.00467855	0.525562	0.0442152	0.794138	0.000406742	-0.211543	0.449137	0.146768	0.6017
Gm8273	blue	0.959972	-0.489702	0.396578	0.0886337	1178.5	1102.29	76.2153	1026.07	0.255226	0.358585	-0.940826	1.779e-07	0.685601	0.004782	0.396578	0.143329	0.959972	1.46862e-08	-0.489702	0.0638998	0.0886337	0.753434
Tubgcp6	blue	0.970238	-0.502237	0.40803	0.0667555	1237.34	1158.37	78.9697	1079.4	0.258846	0.351569	-0.943809	1.28033e-07	0.684963	0.00483699	0.40803	0.131091	0.970238	2.19363e-09	-0.502237	0.0564121	0.0667555	0.813141
Spsb3	blue	0.974939	-0.516919	0.386009	0.0513591	1285.02	1204.56	80.463	1124.09	0.27203	0.326677	-0.956989	2.32638e-08	0.684959	0.00483731	0.386009	0.155288	0.974939	7.25632e-10	-0.516919	0.0484812	0.0513591	0.855759
Fbxw19	blue	0.775543	-0.230901	0.516941	0.220715	416.601	340.161	76.4399	263.721	0.0185464	0.947694	-0.703072	0.00345738	0.684525	0.00487506	0.516941	0.0484701	0.775543	0.000679855	-0.230901	0.407688	0.220715	0.429243
Zfp329	blue	0.963589	-0.49195	0.392952	0.111413	1194.04	1119.62	74.4214	1045.19	0.247146	0.374517	-0.931372	4.55588e-07	0.684225	0.00490126	0.392952	0.14736	0.963589	8.00461e-09	-0.49195	0.0625066	0.111413	0.692621
Mfng	blue	0.972776	-0.487585	0.401206	0.123194	1252.77	1174.88	77.8897	1096.99	0.249432	0.369971	-0.933481	3.73826e-07	0.684049	0.0049167	0.401206	0.138294	0.972776	1.23639e-09	-0.487585	0.0652322	0.123194	0.661815
Zfp251	blue	0.958843	-0.491806	0.418602	0.109348	1162	1082.83	79.1693	1003.66	0.25313	0.362681	-0.936997	2.64918e-07	0.683867	0.00493271	0.418602	0.120442	0.958843	1.75489e-08	-0.491806	0.0625954	0.109348	0.69807
Glb1l2	blue	0.587792	0.0457419	0.619382	-0.17148	258.522	124.803	133.719	-8.91666	-0.253416	0.362121	-0.430255	0.109411	0.683671	0.00494998	0.619382	0.0138009	0.587792	0.0212009	0.0457419	0.871407	-0.17148	0.54115
Papss1	blue	0.976988	-0.518284	0.394136	0.0783318	1281.14	1201.56	79.5787	1121.99	0.260473	0.348443	-0.943856	1.27354e-07	0.683384	0.00497542	0.394136	0.146035	0.976988	4.18918e-10	-0.518284	0.0477883	0.0783318	0.781408
Pbx2	blue	0.991844	-0.532212	0.392251	0.0187427	1401.38	1316.66	84.7198	1231.94	0.283162	0.306464	-0.96621	4.95723e-09	0.683047	0.00500527	0.392251	0.148148	0.991844	5.12312e-13	-0.532212	0.0411273	0.0187427	0.947141
Lrch4	blue	0.974313	-0.475233	0.431513	0.0606571	1253.1	1170.12	82.979	1087.14	0.234612	0.399978	-0.91745	1.46253e-06	0.682838	0.00502395	0.431513	0.108264	0.974313	8.50602e-10	-0.475233	0.0734098	0.0606571	0.82997
Atad5	blue	0.950211	-0.486126	0.413375	0.0708777	1103.33	1028.32	75.0138	953.306	0.240466	0.387974	-0.923064	9.38183e-07	0.682598	0.00504545	0.413375	0.12563	0.950211	5.9244e-08	-0.486126	0.0661623	0.0708777	0.801808
Ear11	blue	-0.632296	0.124281	-0.517824	0.105387	210.887	139.639	71.2475	68.3917	0.117001	0.677949	0.565568	0.0279958	-0.682569	0.00504802	-0.517824	0.0480207	-0.632296	0.0114314	0.124281	0.658997	0.105387	0.708556
Rab11fip5	blue	0.975293	-0.49653	0.408625	0.0878958	1265.71	1186.32	79.3863	1106.94	0.252602	0.363718	-0.935072	3.20671e-07	0.68247	0.00505691	0.408625	0.130476	0.975293	6.62059e-10	-0.49653	0.0597373	0.0878958	0.755428
Gm7102	blue	0.990099	-0.522461	0.40236	0.0682253	1378.97	1294.44	84.5279	1209.91	0.276436	0.318587	-0.957934	2.01813e-08	0.681498	0.00514474	0.40236	0.137058	0.990099	1.79919e-12	-0.522461	0.0457123	0.0682253	0.809096
Clk2	blue	0.986517	-0.500031	0.408905	0.152102	1349.92	1268.1	81.8247	1186.27	0.265917	0.33809	-0.947327	8.48269e-08	0.68141	0.00515276	0.408905	0.130186	0.986517	1.32727e-11	-0.500031	0.0576808	0.152102	0.588406
Cnnm4	blue	0.990609	-0.526807	0.395448	-8.42273e-05	1382.31	1298.71	83.5916	1215.12	0.279428	0.313161	-0.960614	1.32422e-08	0.681185	0.00517324	0.395448	0.144578	0.990609	1.27689e-12	-0.526807	0.0436245	-8.42273e-05	0.999762
Wnt6	blue	0.85728	-0.31485	0.483484	-0.188521	663.491	583.964	79.5277	504.436	0.101435	0.719069	-0.78249	0.000564342	0.681055	0.00518514	0.483484	0.0678704	0.85728	4.41989e-05	-0.31485	0.253041	-0.188521	0.501031
Zfp74	blue	0.795329	-0.251459	0.520854	0.20044	504.266	406.706	97.5598	309.146	0.0175024	0.950635	-0.6984	0.00377867	0.680898	0.0051996	0.520854	0.0465031	0.795329	0.000392905	-0.251459	0.365966	0.20044	0.473822
Prkcb	blue	0.897149	-0.345416	0.469046	0.1757	846.85	765.989	80.8613	685.127	0.131101	0.641415	-0.811958	0.000236444	0.680857	0.00520333	0.469046	0.0777716	0.897149	5.80734e-06	-0.345416	0.207313	0.1757	0.531085
B3galt4	blue	0.955164	-0.460897	0.420888	0.18383	1133.83	1058.03	75.7975	982.233	0.237881	0.393251	-0.91843	1.35654e-06	0.680549	0.00523166	0.420888	0.11822	0.955164	3.03437e-08	-0.460897	0.0837947	0.18383	0.511933
Krtap16-1	blue	0.702188	-0.0971118	0.609507	0.254425	402.336	243.516	158.82	84.6965	-0.0987903	0.72613	-0.581266	0.0230488	0.680057	0.00527722	0.609507	0.015856	0.702188	0.00351645	-0.0971118	0.730622	0.254425	0.360147
Pde10a	blue	0.814066	-0.253414	0.487446	0.266436	546.302	467.779	78.5231	389.255	0.0477809	0.865722	-0.727534	0.00211121	0.679753	0.00530548	0.487446	0.0653205	0.814066	0.000220931	-0.253414	0.362125	0.266436	0.337113
Grb10	blue	0.730942	-0.14606	0.517393	0.0381946	358.1	279.113	78.9862	200.127	-0.071956	0.798849	-0.607784	0.0162376	0.67974	0.0053067	0.517393	0.0482395	0.730942	0.0019631	-0.14606	0.603474	0.0381946	0.8925
Afap1	blue	0.987286	-0.517956	0.41013	0.0574418	1353	1267.49	85.5101	1181.98	0.267732	0.334678	-0.947439	8.36833e-08	0.679707	0.00530973	0.41013	0.128926	0.987286	9.07786e-12	-0.517956	0.047954	0.0574418	0.838871
Trim28	blue	0.773857	-0.193249	0.578677	0.223885	537.069	378.622	158.447	220.176	-0.0272469	0.923212	-0.652369	0.00839002	0.679616	0.00531829	0.578677	0.023815	0.773857	0.000710603	-0.193249	0.490151	0.223885	0.422473
Col3a1	blue	0.878937	-0.366375	0.425717	-0.00674627	742.432	677.819	64.6134	613.205	0.136138	0.628542	-0.81571	0.000209424	0.679572	0.00532234	0.425717	0.11362	0.878937	1.6013e-05	-0.366375	0.179229	-0.00674627	0.980963
Tia1	blue	0.925632	-0.459977	0.383299	-0.0429104	963.66	899.983	63.6764	836.307	0.219211	0.432474	-0.898283	5.41882e-06	0.679072	0.00536923	0.383299	0.158459	0.925632	7.57203e-07	-0.459977	0.0844951	-0.0429104	0.879311
Zfp677	blue	0.986835	-0.523	0.388719	0.0570489	1361.19	1279.57	81.6227	1197.94	0.283641	0.305613	-0.962304	9.99829e-09	0.678663	0.00540784	0.388719	0.152161	0.986835	1.13725e-11	-0.523	0.0454499	0.0570489	0.83996
Sh2d3c	blue	0.993402	-0.522894	0.39913	0.0793844	1399.33	1315.44	83.8936	1231.55	0.279683	0.312702	-0.957503	2.15405e-08	0.677821	0.00548807	0.39913	0.140538	0.993402	1.29583e-13	-0.522894	0.0455011	0.0793844	0.778538
Dtx1	blue	0.969587	-0.488298	0.402717	0.117018	1219.91	1144.99	74.922	1070.07	0.246613	0.375582	-0.924281	8.48376e-07	0.677668	0.00550274	0.402717	0.136677	0.969587	2.52089e-09	-0.488298	0.0647812	0.117018	0.677905
Pilrb2	blue	0.963164	-0.457797	0.4316	0.154673	1173.71	1096.05	77.6594	1018.39	0.227566	0.414681	-0.904938	3.54874e-06	0.677371	0.00553123	0.4316	0.108185	0.963164	8.62375e-09	-0.457797	0.0861704	0.154673	0.582041
A430105I19Rik	blue	0.992808	-0.526682	0.395652	0.127453	1400.85	1316.58	84.269	1232.31	0.286848	0.299938	-0.963646	7.92547e-09	0.676798	0.0055867	0.395652	0.144352	0.992808	2.26676e-13	-0.526682	0.0436835	0.127453	0.650798
Pdlim2	blue	0.992987	-0.530862	0.387664	0.087706	1402.12	1319.11	83.0092	1236.1	0.288477	0.297079	-0.964855	6.38008e-09	0.676378	0.00562763	0.387664	0.153373	0.992987	1.92426e-13	-0.530862	0.0417409	0.087706	0.755942
Lsm11	blue	0.924089	-0.412492	0.432872	0.0877689	956.245	884.176	72.069	812.107	0.188763	0.500471	-0.864963	3.14491e-05	0.676201	0.00564496	0.432872	0.107034	0.924089	8.62023e-07	-0.412492	0.126521	0.0877689	0.755772
Paqr4	blue	0.994276	-0.52252	0.401676	0.114785	1405.75	1321.29	84.4591	1236.83	0.282948	0.306847	-0.958725	1.78725e-08	0.675777	0.00568652	0.401676	0.13779	0.994276	5.15764e-14	-0.52252	0.0456837	0.114785	0.683756
Zfp14	blue	0.934358	-0.459421	0.418357	0.0179866	1002.75	932.643	70.1063	862.537	0.2122	0.447698	-0.887973	9.89276e-06	0.675773	0.005687	0.418357	0.120682	0.934358	3.43681e-07	-0.459421	0.0849199	0.0179866	0.949271
Tmem39b	blue	0.994381	-0.528181	0.398205	0.0822264	1412.18	1326.98	85.1986	1241.78	0.288338	0.297323	-0.96396	7.49649e-09	0.675622	0.00570181	0.398205	0.141546	0.994381	4.57557e-14	-0.528181	0.0429794	0.0822264	0.770801
4831426I19Rik	blue	0.913313	-0.392099	0.473393	0.125889	909.438	823.706	85.7323	737.973	0.159814	0.5694	-0.834691	0.000108466	0.674877	0.00577572	0.473393	0.0746883	0.913313	1.98934e-06	-0.392099	0.14832	0.125889	0.654837
Fut7	blue	0.930891	-0.47026	0.418512	0.213224	980.535	910.024	70.5109	839.513	0.223927	0.422383	-0.898618	5.30829e-06	0.674691	0.0057943	0.418512	0.120531	0.930891	4.76157e-07	-0.47026	0.076901	0.213224	0.445458
Ttc30a1	blue	0.981971	-0.529178	0.384944	0.0697951	1333.78	1253	80.7789	1172.22	0.290809	0.293014	-0.965465	5.70172e-09	0.674656	0.00579784	0.384944	0.156529	0.981971	8.67829e-11	-0.529178	0.0425158	0.0697951	0.804781
Zfp688	blue	0.985265	-0.539158	0.37134	0.0414759	1363.75	1282.48	81.2678	1201.22	0.296549	0.283151	-0.97114	1.79987e-09	0.674591	0.00580432	0.37134	0.17296	0.985265	2.35659e-11	-0.539158	0.0380762	0.0414759	0.88332
Sac3d1	blue	0.987313	-0.538623	0.373311	0.0334248	1377.32	1295.57	81.7527	1213.82	0.296466	0.283291	-0.971003	1.8554e-09	0.674536	0.00580979	0.373311	0.170512	0.987313	8.95158e-12	-0.538623	0.038305	0.0334248	0.905866
Mamdc4	blue	0.98112	-0.523837	0.378971	0.0480224	1321.07	1242.44	78.6297	1163.81	0.283128	0.306526	-0.957456	2.16951e-08	0.674328	0.00583069	0.378971	0.16361	0.98112	1.16886e-10	-0.523837	0.0450436	0.0480224	0.865049
Slc24a6	blue	0.916331	-0.402874	0.459261	0.177462	908.531	831.565	76.9662	754.599	0.173418	0.536517	-0.847551	6.62012e-05	0.674134	0.00585025	0.459261	0.0850424	0.916331	1.59196e-06	-0.402874	0.13651	0.177462	0.526907
Ppapdc1b	blue	0.946626	-0.497986	0.385947	0.113961	1075.05	1005.4	69.6483	935.754	0.244262	0.380295	-0.918374	1.36244e-06	0.674112	0.00585247	0.385947	0.15536	0.946626	9.22888e-08	-0.497986	0.0588758	0.113961	0.685917
Dusp7	blue	0.918348	-0.456823	0.386077	0.0445515	932.397	869.031	63.3658	805.665	0.228171	0.413409	-0.901889	4.32406e-06	0.673719	0.00589214	0.386077	0.155209	0.918348	1.36517e-06	-0.456823	0.0869273	0.0445515	0.874729
Cd97	blue	0.940689	-0.431894	0.420012	0.139461	1057.35	984.132	73.2206	910.911	0.216643	0.438019	-0.889576	9.04393e-06	0.672933	0.00597218	0.420012	0.119069	0.940689	1.80538e-07	-0.431894	0.107918	0.139461	0.620101
Zmym6	blue	0.967058	-0.483063	0.421333	0.118768	1207.12	1128.34	78.7776	1049.57	0.24557	0.377669	-0.918223	1.37841e-06	0.672653	0.00600091	0.421333	0.117792	0.967058	4.21098e-09	-0.483063	0.0681456	0.118768	0.673332
Gm9456	blue	0.93582	-0.459587	0.384183	0.0916695	1015.61	951.139	64.4704	886.669	0.227791	0.414207	-0.900441	4.73907e-06	0.67265	0.00600118	0.384183	0.157419	0.93582	2.97935e-07	-0.459587	0.0847926	0.0916695	0.745243
Ace2	blue	-0.620984	0.0411162	-0.544345	-0.239128	209.658	131.321	78.3371	52.9841	0.181077	0.518384	0.491561	0.0627466	-0.672637	0.00600252	-0.544345	0.0359103	-0.620984	0.0134879	0.0411162	0.884326	-0.239128	0.390701
Wnt5a	blue	0.777734	-0.227563	0.556602	0.136578	523.201	378.475	144.726	233.749	0.00250814	0.992922	-0.675111	0.00575248	0.672603	0.00600607	0.556602	0.0311592	0.777734	0.000641521	-0.227563	0.414688	0.136578	0.627421
Pdgfra	blue	0.974039	-0.517571	0.393982	0.0744184	1266.9	1189.49	77.4165	1112.07	0.27472	0.321724	-0.947302	8.5089e-08	0.672582	0.00600823	0.393982	0.146208	0.974039	9.10748e-10	-0.517571	0.0481491	0.0744184	0.792102
Ift81	blue	0.96936	-0.498875	0.390604	0.0467477	1236.62	1161.02	75.5915	1085.43	0.267722	0.334696	-0.94025	1.89211e-07	0.672527	0.00601385	0.390604	0.15001	0.96936	2.64429e-09	-0.498875	0.058354	0.0467477	0.868602
Epha7	blue	0.689875	-0.0351418	0.609985	0.364216	385.177	248.643	136.534	112.109	-0.123195	0.661813	-0.548826	0.0341146	0.672021	0.00606614	0.609985	0.0157514	0.689875	0.00442593	-0.0351418	0.901052	0.364216	0.182
Rad50	blue	0.963267	-0.49538	0.389601	0.0767713	1184.93	1113.98	70.9557	1043.02	0.253929	0.361116	-0.925811	7.45718e-07	0.671882	0.00608054	0.389601	0.151152	0.963267	8.46945e-09	-0.49538	0.060424	0.0767713	0.785668
Lrrc32	blue	0.976456	-0.495196	0.418139	0.0532261	1265.83	1184.64	81.1848	1103.46	0.257073	0.354996	-0.928839	5.73028e-07	0.671766	0.00609258	0.418139	0.120896	0.976456	4.85352e-10	-0.495196	0.0605343	0.0532261	0.850569
Cobra1	blue	0.994526	-0.539021	0.38076	0.0478367	1418.36	1335.3	83.0657	1252.23	0.294072	0.287383	-0.965558	5.60395e-09	0.671486	0.00612176	0.38076	0.161468	0.994526	3.86045e-14	-0.539021	0.0381347	0.0478367	0.865566
Gng8	blue	0.665985	-0.048756	0.613003	0.173249	328.234	189.617	138.617	50.9998	-0.140184	0.618271	-0.531291	0.0415452	0.671475	0.00612291	0.613003	0.0151032	0.665985	0.00671768	-0.048756	0.863005	0.173249	0.53692
Rhox5	blue	0.556575	0.0718439	0.575124	0.124432	215.914	111.044	104.87	6.17357	-0.256463	0.356179	-0.414717	0.124284	0.67118	0.0061538	0.575124	0.0248977	0.556575	0.0311692	0.0718439	0.799157	0.124432	0.658607
4930572J05Rik	blue	0.866173	-0.355057	0.465683	0.00278269	668.944	600.987	67.9571	533.03	0.135072	0.631257	-0.805655	0.000288236	0.670583	0.00621664	0.465683	0.0802181	0.866173	2.97523e-05	-0.355057	0.194067	0.00278269	0.992147
BC025920	blue	0.974989	-0.518446	0.388291	0.130797	1268.99	1192.96	76.0325	1116.93	0.276501	0.318469	-0.946627	9.22683e-08	0.670126	0.00626505	0.388291	0.152651	0.974989	7.16314e-10	-0.518446	0.0477065	0.130797	0.642195
Sertad3	blue	0.973771	-0.530859	0.376988	0.0385861	1275.15	1196.66	78.492	1118.17	0.294789	0.286153	-0.964616	6.66357e-09	0.669826	0.00629697	0.376988	0.166007	0.973771	9.72928e-10	-0.530859	0.0417424	0.0385861	0.891404
6330416G13Rik	blue	0.986412	-0.535711	0.377948	0.15031	1356.49	1275.88	80.6128	1195.26	0.294832	0.28608	-0.964491	6.81572e-09	0.669659	0.00631487	0.377948	0.164843	0.986412	1.39535e-11	-0.535711	0.0395686	0.15031	0.592858
Amigo3	blue	0.676912	-0.17116	0.454032	0.0210199	253.707	196.737	56.9703	139.767	-0.0396209	0.888508	-0.629737	0.0118738	0.669358	0.00634716	0.454032	0.0891204	0.676912	0.00557568	-0.17116	0.541916	0.0210199	0.940728
Otud1	blue	0.923912	-0.446876	0.413112	0.0212935	940.474	873.941	66.5326	807.409	0.227784	0.414222	-0.897129	5.81434e-06	0.669345	0.0063485	0.413112	0.125895	0.923912	8.74803e-07	-0.446876	0.0949221	0.0212935	0.939958
Stbd1	blue	0.980455	-0.524222	0.388556	0.045671	1307.16	1228.64	78.5221	1150.12	0.280423	0.311369	-0.949206	6.72989e-08	0.668783	0.00640914	0.388556	0.152348	0.980455	1.46129e-10	-0.524222	0.0448578	0.045671	0.871605
Sqle	blue	0.84527	-0.36171	0.423101	-0.00333663	615.391	554.661	60.7304	493.93	0.143965	0.608733	-0.812699	0.000230897	0.668734	0.00641448	0.423101	0.116096	0.84527	7.24916e-05	-0.36171	0.185251	-0.00333663	0.990584
Zfp324	blue	0.987038	-0.541086	0.37452	0.0423782	1360.82	1280.32	80.491	1199.83	0.294488	0.28667	-0.963113	8.70093e-09	0.668625	0.00642624	0.37452	0.169022	0.987038	1.0286e-11	-0.541086	0.0372598	0.0423782	0.880799
Lrrcc1	blue	0.978838	-0.524454	0.383838	0.0696574	1288.33	1211.5	76.8267	1134.67	0.279559	0.312925	-0.948009	7.80639e-08	0.66845	0.0064452	0.383838	0.157824	0.978838	2.44039e-10	-0.524454	0.0447462	0.0696574	0.805159
LOC100048452	blue	0.669096	-0.143584	0.467814	-0.093122	247.882	187.088	60.7943	126.294	-0.0465475	0.86916	-0.621728	0.0133444	0.668276	0.00646421	0.467814	0.0786616	0.669096	0.00637534	-0.143584	0.609691	-0.093122	0.741332
Rgs16	blue	-0.928474	0.491292	-0.374872	0.0676358	983.109	918.844	64.2653	854.579	-0.252169	0.364568	0.920259	1.17589e-06	-0.668091	0.00648442	-0.374872	0.168589	-0.928474	5.91853e-07	0.491292	0.0629126	0.0676358	0.810718
Zfp3	blue	0.89911	-0.417907	0.40167	0.0721084	830.543	769.63	60.9125	708.718	0.190154	0.497261	-0.85813	4.26065e-05	0.667976	0.00649691	0.40167	0.137797	0.89911	5.14955e-06	-0.417907	0.121123	0.0721084	0.798431
Cyp4a12a	blue	0.668739	-0.0943074	0.549882	0.109326	259.712	178.565	81.1475	97.4174	-0.126034	0.654461	-0.541404	0.0371268	0.667438	0.00655602	0.549882	0.0337013	0.668739	0.00641384	-0.0943074	0.738146	0.109326	0.698126
Ppp1r14a	blue	0.924676	-0.453244	0.380816	0.064112	970.837	906.488	64.3481	842.14	0.228771	0.412148	-0.896152	6.16779e-06	0.667382	0.0065622	0.380816	0.1614	0.924676	8.20819e-07	-0.453244	0.0897467	0.064112	0.820427
Acap2	blue	0.970915	-0.498096	0.406842	0.113209	1233.77	1156.98	76.7926	1080.19	0.256575	0.355962	-0.923166	9.30374e-07	0.666591	0.00664988	0.406842	0.132326	0.970915	1.89174e-09	-0.498096	0.0588108	0.113209	0.687893
Ttll3	blue	0.642649	-0.0204556	0.541025	0.0311566	251.785	165.128	86.6568	78.471	-0.142865	0.611501	-0.523464	0.0452243	0.666329	0.0066791	0.541025	0.0372856	0.642649	0.00977129	-0.0204556	0.942317	0.0311566	0.91223
Hoxb7	blue	0.988921	-0.532764	0.389714	0.0591707	1371.63	1289.6	82.0264	1207.58	0.296622	0.283027	-0.962706	9.33426e-09	0.666084	0.00670653	0.389714	0.151022	0.988921	3.72443e-12	-0.532764	0.0408783	0.0591707	0.834083
Stx2	blue	0.988968	-0.545654	0.377408	0.0159588	1376.42	1294.51	81.9085	1212.61	0.298454	0.279921	-0.964339	7.00537e-09	0.665884	0.00672898	0.377408	0.165497	0.988968	3.62308e-12	-0.545654	0.0353783	0.0159588	0.954984
Cybasc3	blue	0.986375	-0.548931	0.366557	0.087976	1364.23	1283.52	80.7056	1202.82	0.302975	0.272347	-0.968769	2.9893e-09	0.665795	0.00673906	0.366557	0.178996	0.986375	1.42054e-11	-0.548931	0.0340731	0.087976	0.755212
Anapc7	blue	0.934943	-0.502349	0.380741	0.136787	1015.02	948.037	66.9817	881.056	0.262116	0.345299	-0.927337	6.53956e-07	0.66522	0.00680398	0.380741	0.16149	0.934943	3.24721e-07	-0.502349	0.0563483	0.136787	0.626891
B930041F14Rik	blue	0.953935	-0.46827	0.440089	0.156605	1123.32	1039	84.3147	954.688	0.228874	0.41193	-0.893893	7.05446e-06	0.665018	0.00682697	0.440089	0.100665	0.953935	3.60692e-08	-0.46827	0.0783315	0.156605	0.577276
Tubb2c	blue	0.869465	-0.413451	0.378629	0.000941583	721.234	662.304	58.9309	603.373	0.190273	0.496986	-0.854976	4.87631e-05	0.664703	0.00686291	0.378629	0.164021	0.869465	2.5516e-05	-0.413451	0.125554	0.000941583	0.997343
Capn5	blue	0.98548	-0.545096	0.365405	0.122083	1351.57	1272.57	78.9978	1193.58	0.299499	0.278159	-0.963981	7.46828e-09	0.664482	0.00688817	0.365405	0.18047	0.98548	2.14341e-11	-0.545096	0.0356045	0.122083	0.664701
Brca2	blue	0.960391	-0.514766	0.397659	0.096023	1169.02	1091.86	77.1642	1014.69	0.266071	0.337801	-0.930493	4.93786e-07	0.664423	0.00689497	0.397659	0.142143	0.960391	1.37303e-08	-0.514766	0.0495896	0.096023	0.73354
C230052I12Rik	blue	0.967415	-0.528874	0.376325	0.0739044	1226.79	1151.24	75.5593	1075.68	0.291439	0.291922	-0.955813	2.7643e-08	0.664374	0.00690053	0.376325	0.166813	0.967415	3.92642e-09	-0.528874	0.0426567	0.0739044	0.79351
Fam119a	blue	0.989826	-0.559911	0.359648	0.0288018	1395.47	1312.34	83.1297	1229.21	0.311169	0.258934	-0.974966	7.20572e-10	0.663798	0.00696691	0.359648	0.187956	0.989826	2.1448e-12	-0.559911	0.0299619	0.0288018	0.918843
Csk	blue	0.966429	-0.51204	0.400683	0.024818	1211.71	1133.49	78.2208	1055.27	0.263882	0.34194	-0.927548	6.42052e-07	0.663666	0.00698218	0.400683	0.138857	0.966429	4.75442e-09	-0.51204	0.0510195	0.024818	0.930041
Msh6	blue	0.98536	-0.533115	0.368103	0.0413791	1353.25	1275.45	77.7975	1197.66	0.297704	0.281189	-0.961249	1.19318e-08	0.663545	0.00699617	0.368103	0.17703	0.98536	2.26033e-11	-0.533115	0.0407206	0.0413791	0.883591
Mdfi	blue	0.976432	-0.53499	0.372293	0.0329365	1293.53	1215.63	77.9048	1137.72	0.299959	0.277386	-0.963458	8.19217e-09	0.663499	0.00700156	0.372293	0.171774	0.976432	4.88547e-10	-0.53499	0.0398862	0.0329365	0.907235
C030010C08Rik	blue	0.797394	-0.310508	0.440732	0.0559853	422.903	375.186	47.7173	327.469	0.0699831	0.804264	-0.733301	0.00186556	0.663318	0.00702251	0.440732	0.10011	0.797394	0.000369812	-0.310508	0.26	0.0559853	0.842909
Grasp	blue	0.992337	-0.545963	0.372392	0.119652	1404.96	1323.52	81.4353	1242.08	0.306717	0.266171	-0.969418	2.61233e-09	0.662701	0.00709458	0.372392	0.17165	0.992337	3.41902e-13	-0.545963	0.035254	0.119652	0.671027
Krt42	blue	0.83051	-0.311622	0.479091	0.105883	551.264	480.33	70.9342	409.395	0.0804282	0.775694	-0.742968	0.00150572	0.662539	0.00711356	0.479091	0.0707805	0.83051	0.000126233	-0.311622	0.258204	0.105883	0.707241
Atp4b	blue	0.706982	-0.116613	0.583838	0.228738	418.42	259.225	159.195	100.029	-0.0954293	0.735133	-0.566694	0.0276161	0.662124	0.00716255	0.583838	0.0223064	0.706982	0.00320551	-0.116613	0.678966	0.228738	0.412216
Ttll1	blue	0.892789	-0.419073	0.38247	-0.00943854	784.586	731.64	52.9468	678.693	0.180272	0.520275	-0.841921	8.26124e-05	0.661649	0.00721884	0.38247	0.159436	0.892789	7.52462e-06	-0.419073	0.119983	-0.00943854	0.973368
Nipa1	blue	0.947332	-0.486862	0.402943	0.0721379	1067.97	998.063	69.904	928.159	0.237451	0.394132	-0.898985	5.18934e-06	0.661534	0.00723248	0.402943	0.136436	0.947332	8.4775e-08	-0.486862	0.0656918	0.0721379	0.79835
Shkbp1	blue	0.990014	-0.561355	0.357776	0.0489331	1396.74	1313.98	82.7627	1231.22	0.314537	0.25354	-0.976035	5.44116e-10	0.661497	0.00723682	0.357776	0.190432	0.990014	1.90067e-12	-0.561355	0.0294502	0.0489331	0.862512
Rbm12b	blue	0.975309	-0.545092	0.361311	0.0757776	1283.35	1206.54	76.8112	1129.73	0.302903	0.272466	-0.964166	7.22576e-09	0.661263	0.00726477	0.361311	0.185774	0.975309	6.59366e-10	-0.545092	0.0356061	0.0757776	0.788384
Atn1	blue	0.98209	-0.518844	0.392702	0.0821186	1314.19	1236.42	77.7759	1158.64	0.281909	0.308702	-0.94248	1.48562e-07	0.660571	0.00734784	0.392702	0.147641	0.98209	8.3134e-11	-0.518844	0.0475059	0.0821186	0.771095
Galc	blue	0.845805	-0.366946	0.415323	-0.114146	618.085	559.476	58.6089	500.868	0.156969	0.57638	-0.817382	0.000198228	0.660412	0.00736695	0.415323	0.123679	0.845805	7.09733e-05	-0.366946	0.1785	-0.114146	0.685432
Gm7596	blue	-0.56887	-0.0547478	-0.572913	-0.0599208	205.875	102.624	103.251	-0.626709	0.214136	0.443468	0.445916	0.0957199	-0.660052	0.00741065	-0.572913	0.0255901	-0.56887	0.0268939	-0.0547478	0.846343	-0.0599208	0.832007
D030056L22Rik	blue	0.98264	-0.53977	0.374229	0.0589358	1333.49	1254.9	78.584	1176.32	0.303139	0.272074	-0.963117	8.69484e-09	0.659978	0.00741959	0.374229	0.16938	0.98264	6.79882e-11	-0.53977	0.0378157	0.0589358	0.834733
Hsdl1	blue	0.986084	-0.534226	0.382802	0.150126	1346.96	1267.12	79.8351	1187.29	0.296912	0.282533	-0.956051	2.6706e-08	0.659138	0.00752209	0.382802	0.159044	0.986084	1.62814e-11	-0.534226	0.0402246	0.150126	0.593316
Zfp213	blue	0.970145	-0.542192	0.36106	0.0422608	1253.69	1179.25	74.4384	1104.81	0.298444	0.279938	-0.956949	2.3401e-08	0.658505	0.00760012	0.36106	0.186102	0.970145	2.23773e-09	-0.542192	0.0367976	0.0422608	0.881127
Nup43	blue	0.987937	-0.561703	0.355288	0.0774538	1380.97	1299.65	81.3174	1218.34	0.313734	0.25482	-0.971891	1.519e-09	0.658157	0.00764335	0.355288	0.193756	0.987937	6.45981e-12	-0.561703	0.0293282	0.0774538	0.783805
Vamp1	blue	0.982835	-0.537723	0.372396	0.0789808	1324.3	1246.62	77.6845	1168.93	0.301896	0.274142	-0.959889	1.48837e-08	0.657992	0.00766385	0.372396	0.171646	0.982835	6.32024e-11	-0.537723	0.0386924	0.0789808	0.779638
Dscr3	blue	0.980773	-0.542391	0.353765	0.0727223	1328.72	1252.57	76.1504	1176.42	0.30659	0.266378	-0.964317	7.03305e-09	0.657727	0.00769701	0.353765	0.19581	0.980773	1.31431e-10	-0.542391	0.0367149	0.0727223	0.796748
Trmt12	blue	0.961952	-0.537494	0.35643	0.111692	1205.36	1131.41	73.9543	1057.45	0.302759	0.272705	-0.960384	1.37447e-08	0.657625	0.00770969	0.35643	0.192227	0.961952	1.06113e-08	-0.537494	0.0387913	0.111692	0.691885
St3gal6	blue	-0.655888	0.183274	-0.412152	0.190366	220.285	171.834	48.451	123.383	0.0401351	0.88707	0.617275	0.014221	-0.65741	0.00773665	-0.412152	0.126866	-0.655888	0.00792961	0.183274	0.513234	0.190366	0.496771
Rnf113a1	blue	0.93989	-0.50815	0.359537	0.0244314	1067.42	1000.56	66.86	933.699	0.279141	0.313679	-0.936527	2.77711e-07	0.657386	0.00773968	0.359537	0.188101	0.93989	1.9657e-07	-0.50815	0.0531119	0.0244314	0.931128
Epn2	blue	0.993691	-0.554866	0.368382	0.110185	1417.75	1334.73	83.0191	1251.71	0.315546	0.251937	-0.972877	1.20717e-09	0.657331	0.00774661	0.368382	0.176678	0.993691	9.69749e-14	-0.554866	0.0318016	0.110185	0.695859
Sik2	blue	0.972725	-0.550655	0.355303	0.0673378	1275.95	1199.08	76.8685	1122.21	0.310015	0.260799	-0.96715	4.13556e-09	0.657136	0.00777112	0.355303	0.193736	0.972725	1.25129e-09	-0.550655	0.0334011	0.0673378	0.811538
Vgll4	blue	0.936165	-0.436163	0.43626	0.179603	1006.96	933.806	73.1579	860.648	0.213498	0.44486	-0.870126	2.47292e-05	0.656628	0.0078353	0.43626	0.104011	0.936165	2.8792e-07	-0.436163	0.104096	0.179603	0.521852
Synm	blue	0.834085	-0.338708	0.426707	0.13642	535.024	488.037	46.9863	441.051	0.107697	0.702433	-0.76362	0.000922479	0.655923	0.0079251	0.426707	0.112693	0.834085	0.000110903	-0.338708	0.216862	0.13642	0.627824
Arhgap39	blue	0.989778	-0.549873	0.366993	0.0610772	1385.9	1305.62	80.2781	1225.34	0.308109	0.263894	-0.963815	7.69165e-09	0.655706	0.00795289	0.366993	0.178441	0.989778	2.21207e-12	-0.549873	0.0337049	0.0610772	0.828809
Mtap1a	blue	0.69169	-0.0730144	0.616927	0.362166	424.812	241.555	183.257	58.2974	-0.110475	0.695093	-0.545209	0.0355588	0.655684	0.00795572	0.616927	0.0142913	0.69169	0.00428125	-0.0730144	0.795948	0.362166	0.184658
Pitx3	blue	-0.57324	0.0238696	-0.46767	0.116596	192.096	116.61	75.4864	41.1235	0.166676	0.552707	0.48895	0.0643707	-0.655626	0.00796308	-0.46767	0.0787658	-0.57324	0.0254868	0.0238696	0.932709	0.116596	0.679009
Ogg1	blue	0.991402	-0.568257	0.353239	0.0827563	1410.77	1327.44	83.3268	1244.12	0.320647	0.243932	-0.97614	5.28907e-10	0.655493	0.00798021	0.353239	0.196523	0.991402	7.21181e-13	-0.568257	0.0270961	0.0827563	0.769361
Zfp90	blue	0.987939	-0.556188	0.35461	0.0405939	1381	1300.73	80.2722	1220.46	0.318578	0.24716	-0.973696	9.91157e-10	0.655118	0.00802858	0.35461	0.194669	0.987939	6.45413e-12	-0.556188	0.0313116	0.0405939	0.885786
Rufy2	blue	0.978662	-0.548144	0.351794	0.0991667	1306.18	1231.36	74.8199	1156.54	0.304097	0.270485	-0.95863	1.81396e-08	0.654532	0.00810452	0.351794	0.198487	0.978662	2.57424e-10	-0.548144	0.0343832	0.0991667	0.725123
Retnla	blue	0.618234	-0.0417744	0.556475	0.189205	207.159	124.125	83.0339	41.0909	-0.145925	0.603812	-0.508579	0.0528778	0.654504	0.00810821	0.556475	0.031206	0.618234	0.0140285	-0.0417744	0.882486	0.189205	0.499449
Tug1	blue	0.979528	-0.549783	0.35774	0.0398019	1322.43	1245.11	77.318	1167.79	0.314141	0.25417	-0.968335	3.26662e-09	0.654194	0.00814871	0.35774	0.19048	0.979528	1.97076e-10	-0.549783	0.03374	0.0398019	0.888002
Nr5a2	blue	-0.962438	0.533039	-0.3505	0.0225548	1204.62	1131.68	72.9376	1058.75	-0.299471	0.278206	0.953638	3.75782e-08	-0.654167	0.00815223	-0.3505	0.200259	-0.962438	9.77254e-09	0.533039	0.040755	0.0225548	0.936408
Zfp512	blue	0.98648	-0.541654	0.383869	0.157158	1353.52	1272.21	81.3172	1190.89	0.301411	0.274953	-0.955536	2.87694e-08	0.654125	0.00815763	0.383869	0.157787	0.98648	1.35107e-11	-0.541654	0.037022	0.157158	0.575915
Evc2	blue	0.872673	-0.392262	0.418187	-0.220268	681.384	627.012	54.3718	572.64	0.168391	0.54857	-0.822156	0.000168926	0.653766	0.0082048	0.418187	0.120849	0.872673	2.1881e-05	-0.392262	0.148135	-0.220268	0.430201
Serinc4	blue	0.923205	-0.501266	0.354039	-0.000950717	967.121	905.503	61.6185	843.884	0.266662	0.336687	-0.920332	1.16912e-06	0.65367	0.00821736	0.354039	0.195439	0.923205	9.27394e-07	-0.501266	0.0569681	-0.000950717	0.997317
Mtcp1	blue	0.967738	-0.529322	0.359006	0.136943	1222.62	1152.74	69.8795	1082.87	0.289715	0.294917	-0.943344	1.34924e-07	0.65363	0.00822269	0.359006	0.188802	0.967738	3.68266e-09	-0.529322	0.0424491	0.136943	0.626494
Olfr1033	blue	0.877515	-0.429471	0.373609	0.012598	738.234	684.408	53.8252	630.583	0.210518	0.451389	-0.863649	3.33823e-05	0.653131	0.00828859	0.373609	0.170144	0.877515	1.72147e-05	-0.429471	0.110131	0.012598	0.964458
Dmrt1	blue	0.888891	-0.385151	0.472584	0.221595	792.586	706.092	86.494	619.598	0.15585	0.579137	-0.808566	0.000263267	0.652717	0.00834359	0.472584	0.0752555	0.888891	9.39873e-06	-0.385151	0.156287	0.221595	0.427357
Frmd8	blue	0.962091	-0.533284	0.362411	-0.00955286	1182.05	1111.13	70.9196	1040.21	0.285547	0.302232	-0.938224	2.33843e-07	0.652677	0.00834889	0.362411	0.184339	0.962091	1.0366e-08	-0.533284	0.040645	-0.00955286	0.973046
Tmed3	blue	0.958703	-0.546071	0.337067	-0.0136652	1179	1107.11	71.8923	1035.22	0.297154	0.282123	-0.94982	6.22728e-08	0.652666	0.00835029	0.337067	0.21924	0.958703	1.79337e-08	-0.546071	0.0352104	-0.0136652	0.961449
Gm3367	blue	0.913058	-0.420479	0.425455	0.120078	879.564	816.59	62.9743	753.616	0.20309	0.467872	-0.855074	4.8561e-05	0.651984	0.00844161	0.425455	0.113867	0.913058	2.02644e-06	-0.420479	0.118616	0.120078	0.669917
Zfp36l1	blue	-0.966141	0.552897	-0.351578	-0.135373	1227.58	1152.42	75.1553	1077.27	-0.3079	0.264236	0.959732	1.52595e-08	-0.651833	0.008462	-0.351578	0.198782	-0.966141	5.02223e-09	0.552897	0.0325423	-0.135373	0.630491
Nfe2	blue	0.889475	-0.428513	0.383704	-0.0477548	761.559	707.572	53.9873	653.584	0.200433	0.473839	-0.851964	5.53115e-05	0.651531	0.00850268	0.383704	0.157982	0.889475	9.09557e-06	-0.428513	0.111014	-0.0477548	0.865794
Slc50a1	blue	0.968541	-0.522074	0.383256	0.1033	1209.04	1135.64	73.3966	1062.25	0.274219	0.322643	-0.925578	7.60641e-07	0.651359	0.00852596	0.383256	0.158508	0.968541	3.13248e-09	-0.522074	0.0459021	0.1033	0.714101
Defb42	blue	0.720452	-0.159112	0.553028	0.154849	388.409	265.419	122.99	142.429	-0.0509202	0.85698	-0.600355	0.0179641	0.651276	0.00853723	0.553028	0.0324924	0.720452	0.00244765	-0.159112	0.571118	0.154849	0.581605
Dhx57	blue	0.9759	-0.541	0.376165	0.0788523	1280.68	1202.49	78.1874	1124.31	0.292489	0.290106	-0.943749	1.28902e-07	0.65126	0.00853936	0.376165	0.167008	0.9759	5.64155e-10	-0.541	0.037296	0.0788523	0.779989
Lig4	blue	0.942807	-0.519817	0.34738	0.0478991	1083.74	1017.34	66.4073	950.93	0.29022	0.294038	-0.940894	1.76611e-07	0.650674	0.00861911	0.34738	0.204569	0.942807	1.43271e-07	-0.519817	0.0470185	0.0478991	0.865392
Gm10778	blue	0.941412	-0.505722	0.388976	-0.109431	1040.77	971.889	68.8766	903.012	0.26171	0.346074	-0.911909	2.20073e-06	0.650198	0.00868428	0.388976	0.151867	0.941412	1.67006e-07	-0.505722	0.0544494	-0.109431	0.697849
Specc1l	blue	0.958143	-0.478141	0.410106	0.138375	1142.13	1070.52	71.6021	998.921	0.25172	0.36545	-0.901553	4.41775e-06	0.649832	0.00873472	0.410106	0.128951	0.958143	1.95492e-08	-0.478141	0.0714215	0.138375	0.622854
Taf6l	blue	0.977641	-0.552975	0.348319	0.0060415	1301.04	1226.08	74.9582	1151.13	0.311425	0.258521	-0.960581	1.33135e-08	0.649155	0.00882853	0.348319	0.203266	0.977641	3.47933e-10	-0.552975	0.0325127	0.0060415	0.982952
Hmgn3	blue	0.953042	-0.530128	0.358676	-0.0235692	1119.36	1051.37	67.9833	983.392	0.283756	0.305407	-0.932758	4.00348e-07	0.649002	0.00884997	0.358676	0.189239	0.953042	4.07707e-08	-0.530128	0.0420771	-0.0235692	0.933554
Skp2	blue	0.97903	-0.54609	0.3615	0.0219628	1303.87	1226.98	76.8914	1150.09	0.314851	0.253041	-0.96336	8.3328e-09	0.648509	0.00891881	0.3615	0.185527	0.97903	2.30111e-10	-0.54609	0.0352029	0.0219628	0.938074
Zfp13	blue	0.969307	-0.553138	0.358445	0.073653	1239.78	1163.85	75.9265	1087.93	0.306079	0.267218	-0.954505	3.33074e-08	0.648427	0.00893042	0.358445	0.189545	0.969307	2.67346e-09	-0.553138	0.032451	0.073653	0.794198
Zfp853	blue	0.583875	0.0808939	0.637477	0.342057	290.201	131.946	158.255	-26.3084	-0.241484	0.385908	-0.405981	0.133226	0.647465	0.00906628	0.637477	0.0105753	0.583875	0.0222961	0.0808939	0.774426	0.342057	0.212061
Tmcc3	blue	0.98108	-0.53795	0.367874	0.0726227	1313.27	1237.14	76.1323	1161.01	0.30595	0.267429	-0.953377	3.89524e-08	0.647427	0.00907175	0.367874	0.177321	0.98108	1.18478e-10	-0.53795	0.0385942	0.0726227	0.797021
Gata2	blue	0.96199	-0.519586	0.374604	0.183546	1169.8	1099.68	70.121	1029.56	0.292708	0.289728	-0.939917	1.96004e-07	0.647209	0.00910279	0.374604	0.168919	0.96199	1.05439e-08	-0.519586	0.0471339	0.183546	0.512596
Zfp322a	blue	0.949142	-0.538329	0.335392	0.0373925	1129.42	1060.17	69.2486	990.92	0.305281	0.26853	-0.951722	4.8667e-08	0.646441	0.00921273	0.335392	0.221683	0.949142	6.78368e-08	-0.538329	0.038431	0.0373925	0.894746
Dcaf4	blue	0.936655	-0.490381	0.389356	0.0848599	1006.36	940.914	65.4428	875.471	0.240384	0.388143	-0.886446	1.07617e-05	0.646062	0.00926742	0.389356	0.151431	0.936655	2.74188e-07	-0.490381	0.0634768	0.0848599	0.76365
Ezh1	blue	0.98704	-0.570097	0.348831	0.0957997	1376.83	1295.65	81.1786	1214.47	0.325474	0.236502	-0.971192	1.77888e-09	0.645718	0.00931729	0.348831	0.202557	0.98704	1.02758e-11	-0.570097	0.026493	0.0957997	0.734139
Egfl7	blue	0.989968	-0.560247	0.351071	0.0982023	1393.63	1313.89	79.7496	1234.14	0.324442	0.238079	-0.97015	2.23536e-09	0.645708	0.00931869	0.351071	0.199475	0.989968	1.95833e-12	-0.560247	0.0298422	0.0982023	0.727703
Arhgef6	blue	0.987021	-0.552744	0.370158	0.110678	1358.25	1278.03	80.2244	1197.8	0.31341	0.255337	-0.958998	1.71295e-08	0.645588	0.00933615	0.370158	0.174439	0.987021	1.03744e-11	-0.552744	0.0326003	0.110678	0.694559
Acaa1a	blue	-0.971904	0.535759	-0.360275	-0.0752251	1250.5	1177.53	72.9733	1104.56	-0.308938	0.262544	0.953816	3.66667e-08	-0.644877	0.00943994	-0.360275	0.187131	-0.971904	1.51463e-09	0.535759	0.0395474	-0.0752251	0.789895
Doc2g	blue	0.959383	-0.505699	0.392354	0.242672	1146.37	1075.33	71.0451	1004.28	0.274875	0.321441	-0.919501	1.24816e-06	0.644627	0.00947681	0.392354	0.148033	0.959383	1.61273e-08	-0.505699	0.054462	0.242672	0.383503
Trim68	blue	0.960458	-0.526645	0.354727	0.0434458	1166.16	1099.45	66.7114	1032.74	0.285173	0.302893	-0.929757	5.27859e-07	0.644583	0.00948317	0.354727	0.194511	0.960458	1.35813e-08	-0.526645	0.0437012	0.0434458	0.877816
Mterf	blue	0.982376	-0.566433	0.355367	0.0895118	1342.13	1261.2	80.9275	1180.27	0.323539	0.239463	-0.967914	3.5557e-09	0.644375	0.00951383	0.355367	0.193651	0.982376	7.49459e-11	-0.566433	0.0277039	0.0895118	0.751062
Dhh	blue	0.949807	-0.520984	0.373987	0.169336	1092.45	1024.74	67.708	957.03	0.278675	0.314523	-0.922934	9.48232e-07	0.644259	0.00953094	0.373987	0.169678	0.949807	6.23795e-08	-0.520984	0.0464386	0.169336	0.546294
Camta2	blue	0.983715	-0.573356	0.34416	0.0600482	1356.29	1275.33	80.9629	1194.37	0.325916	0.235828	-0.969858	2.37993e-09	0.643941	0.00957803	0.34416	0.209081	0.983715	4.49843e-11	-0.573356	0.0254504	0.0600482	0.831655
Rgs3	blue	-0.822387	0.388815	-0.35974	0.0117776	530.479	483.907	46.5721	437.335	-0.15846	0.572718	0.802075	0.00032156	-0.643615	0.00962653	-0.35974	0.187834	-0.822387	0.000167605	0.388815	0.15205	0.0117776	0.966771
100043387	blue	0.911146	-0.482714	0.393956	-0.00587879	880.835	817.196	63.6398	753.556	0.242383	0.384086	-0.885983	1.10372e-05	0.643599	0.00962886	0.393956	0.146237	0.911146	2.32315e-06	-0.482714	0.0683739	-0.00587879	0.983411
Aqp3	blue	0.597817	0.0286837	0.603149	0.308443	241.328	128.035	113.293	14.7421	-0.191648	0.493823	-0.451547	0.0911056	0.643195	0.00968928	0.603149	0.0172989	0.597817	0.0185853	0.0286837	0.919175	0.308443	0.263351
Nde1	blue	0.978351	-0.566614	0.344952	0.070851	1318.09	1239.86	78.2301	1161.63	0.32202	0.241805	-0.965084	6.11766e-09	0.643064	0.00970882	0.344952	0.207966	0.978351	2.82615e-10	-0.566614	0.0276429	0.070851	0.801881
Tbx6	blue	0.960957	-0.516521	0.370538	0.157214	1157.39	1089.57	67.8197	1021.75	0.285264	0.302733	-0.928251	6.03651e-07	0.642987	0.00972044	0.370538	0.173962	0.960957	1.25202e-08	-0.516521	0.0486849	0.157214	0.575779
1700023D09Rik	blue	0.948966	-0.51737	0.36316	0.0909376	1094.85	1029.62	65.232	964.388	0.295047	0.285713	-0.93749	2.5204e-07	0.642443	0.00980231	0.36316	0.183365	0.948966	6.93504e-08	-0.51737	0.0482516	0.0909376	0.747215
Nfam1	blue	0.977334	-0.553352	0.353402	0.0928634	1294.47	1218.51	75.9568	1142.56	0.32191	0.241975	-0.964303	7.05013e-09	0.642394	0.0098098	0.353402	0.196301	0.977334	3.79949e-10	-0.553352	0.0323699	0.0928634	0.742028
Siva1	blue	0.96659	-0.544842	0.361248	0.0802168	1213.92	1140.17	73.7553	1066.41	0.293629	0.288142	-0.936021	2.92058e-07	0.642392	0.00981008	0.361248	0.185856	0.96659	4.60982e-09	-0.544842	0.0357076	0.0802168	0.77627
Pkp1	blue	0.538803	0.0506965	0.572081	-0.222854	161.637	78.8108	82.8266	-4.01579	-0.242808	0.383227	-0.399539	0.140094	0.642348	0.00981677	0.572081	0.0258544	0.538803	0.038228	0.0506965	0.857603	-0.222854	0.424667
Wdr8	blue	0.985319	-0.574425	0.34445	0.0148575	1366	1284.53	81.4662	1203.07	0.333856	0.223939	-0.976157	5.26474e-10	0.642301	0.0098238	0.34445	0.208672	0.985319	2.30173e-11	-0.574425	0.0251153	0.0148575	0.958088
Brms1l	blue	0.978777	-0.56323	0.334797	0.0628786	1327.63	1250.64	76.9848	1173.66	0.329504	0.230409	-0.971573	1.63307e-09	0.642069	0.00985895	0.334797	0.222555	0.978777	2.48635e-10	-0.56323	0.0287961	0.0628786	0.823832
B3gnt9-ps	blue	0.966034	-0.52452	0.361837	0.0824403	1202.46	1134.15	68.3122	1065.84	0.293269	0.288762	-0.935152	3.18146e-07	0.641883	0.00988721	0.361837	0.185086	0.966034	5.12563e-09	-0.52452	0.0447145	0.0824403	0.77022
Hpcal1	blue	0.959011	-0.502117	0.381246	0.147251	1147.6	1080.6	67.0069	1013.59	0.268387	0.333451	-0.909818	2.55005e-06	0.641431	0.00995621	0.381246	0.160889	0.959011	1.70958e-08	-0.502117	0.0564805	0.147251	0.600491
Abi3	blue	0.98281	-0.540183	0.364373	0.128191	1326.37	1251.07	75.2993	1175.77	0.312424	0.256916	-0.953775	3.68731e-08	0.641352	0.00996832	0.364373	0.181798	0.98281	6.37802e-11	-0.540183	0.0376405	0.128191	0.648897
Slc27a3	blue	0.96622	-0.552339	0.329998	0.0623253	1227.51	1156.5	71.0107	1085.49	0.311897	0.257763	-0.953129	4.02911e-08	0.641233	0.00998652	0.329998	0.229669	0.96622	4.94729e-09	-0.552339	0.0327543	0.0623253	0.82536
2810468N07Rik	blue	0.966671	-0.535405	0.367886	0.133013	1198.65	1127.28	71.3638	1055.92	0.297104	0.282207	-0.938249	2.3323e-07	0.641145	0.00999994	0.367886	0.177306	0.966671	4.5385e-09	-0.535405	0.0397029	0.133013	0.636517
Tmem101	blue	0.980496	-0.570964	0.341457	0.0610153	1333.12	1253.3	79.8285	1173.47	0.335577	0.221413	-0.976665	4.58236e-10	0.641089	0.0100086	0.341457	0.212915	0.980496	1.4415e-10	-0.570964	0.0262125	0.0610153	0.82898
Gpr160	blue	0.572734	0.039619	0.585606	0.70632	200.727	101.117	99.6105	1.5061	-0.212919	0.446124	-0.427612	0.11185	0.640531	0.0100946	0.585606	0.0218067	0.572734	0.0256469	0.039619	0.888513	0.70632	0.00324711
Armc7	blue	0.826807	-0.36197	0.403331	-0.0372122	510.32	465.154	45.1657	419.988	0.143144	0.6108	-0.783282	0.000552261	0.640138	0.0101554	0.403331	0.136023	0.826807	0.000143902	-0.36197	0.184913	-0.0372122	0.895251
Serac1	blue	0.925754	-0.483144	0.365809	0.0830547	941.716	885.317	56.3992	828.918	0.252998	0.362941	-0.892883	7.48344e-06	0.639885	0.0101947	0.365809	0.179953	0.925754	7.49367e-07	-0.483144	0.0680925	0.0830547	0.76855
Rnf168	blue	0.966123	-0.551301	0.355729	0.104792	1228.21	1154.38	73.8295	1080.55	0.316386	0.250608	-0.956213	2.60826e-08	0.639827	0.0102038	0.355729	0.193164	0.966123	5.03994e-09	-0.551301	0.0331521	0.104792	0.710136
Sdc3	blue	0.949577	-0.487423	0.378219	0.132266	1094.35	1029.92	64.4279	965.494	0.270283	0.329915	-0.9099	2.53558e-06	0.639616	0.0102367	0.378219	0.164516	0.949577	6.42239e-08	-0.487423	0.0653354	0.132266	0.638429
Pdk4	blue	0.794857	-0.296933	0.420908	0.0597301	461.336	406.68	54.6558	352.024	0.10399	0.712266	-0.743216	0.00149728	0.639226	0.0102978	0.420908	0.118201	0.794857	0.000398341	-0.296933	0.282498	0.0597301	0.832535
Tssk6	blue	0.579366	-0.0129944	0.563955	-0.106953	202.868	101.734	101.134	0.600187	-0.193562	0.489435	-0.445101	0.0964013	0.638663	0.0103865	0.563955	0.0285461	0.579366	0.0236092	-0.0129944	0.96334	-0.106953	0.704403
Ufsp1	blue	0.979031	-0.580347	0.335345	0.000356433	1332.75	1251.51	81.2414	1170.27	0.339144	0.216234	-0.977046	4.1213e-10	0.637902	0.0105072	0.335345	0.221752	0.979031	2.30006e-10	-0.580347	0.0233187	0.000356433	0.998994
Ear10	blue	-0.568844	0.0911133	-0.491528	0.203799	137.833	85.4991	52.3339	33.1652	0.136836	0.626765	0.500598	0.0573526	-0.637434	0.0105821	-0.491528	0.0627666	-0.568844	0.0269026	0.0911133	0.746742	0.203799	0.466286
Pacsin2	blue	0.975286	-0.577594	0.330397	0.0628555	1290.75	1212.52	78.2317	1134.29	0.326996	0.23419	-0.964402	6.92559e-09	0.637407	0.0105865	0.330397	0.229072	0.975286	6.63304e-10	-0.577594	0.0241412	0.0628555	0.823895
Tada3	blue	0.980602	-0.568724	0.349665	0.0611798	1328.52	1249.11	79.4087	1169.7	0.331201	0.227872	-0.968572	3.11248e-09	0.637371	0.0105922	0.349665	0.201407	0.980602	1.39198e-10	-0.568724	0.026942	0.0611798	0.828525
Trim13	blue	0.966714	-0.555329	0.350584	0.0136206	1212.62	1138.54	74.0746	1064.47	0.314418	0.25373	-0.951618	4.9342e-08	0.6372	0.0106197	0.350584	0.200143	0.966714	4.50111e-09	-0.555329	0.0316293	0.0136206	0.961575
Ppil1	blue	0.967796	-0.578015	0.330437	0.0306074	1249.21	1171.01	78.2084	1092.8	0.329151	0.230939	-0.966346	4.8306e-09	0.637195	0.0106205	0.330437	0.229012	0.967796	3.64101e-09	-0.578015	0.0240141	0.0306074	0.913772
Gm7461	blue	0.838935	-0.338363	0.465892	0.30284	601.83	526.192	75.6379	450.554	0.113542	0.687018	-0.750245	0.00127358	0.636703	0.0107	0.465892	0.080065	0.838935	9.25913e-05	-0.338363	0.21736	0.30284	0.27257
Speg	blue	0.94558	-0.50326	0.400971	0.136814	1069.4	995.79	73.6102	922.18	0.272941	0.324995	-0.909311	2.6414e-06	0.63637	0.0107539	0.400971	0.138548	0.94558	1.04427e-07	-0.50326	0.0558308	0.136814	0.626821
Wdr67	blue	0.729765	-0.150696	0.57312	0.158682	431.991	286.885	145.106	141.779	-0.0373422	0.894886	-0.598776	0.0183487	0.636118	0.0107948	0.57312	0.0255248	0.729765	0.0020133	-0.150696	0.591898	0.158682	0.572172
1810058I24Rik	blue	-0.976341	0.579654	-0.330827	0.0519618	1311.58	1231.37	80.2072	1151.17	-0.338321	0.217421	0.973582	1.01907e-09	-0.635261	0.0109351	-0.330827	0.228429	-0.976341	5.0084e-10	0.579654	0.0235236	0.0519618	0.854083
Zfp93	blue	0.901562	-0.444455	0.38558	0.0990528	820.38	766.716	53.6641	713.052	0.228803	0.412079	-0.863976	3.28925e-05	0.635172	0.0109497	0.38558	0.155787	0.901562	4.41526e-06	-0.444455	0.0969431	0.0990528	0.725428
Osbpl7	blue	0.725471	-0.205703	0.484931	0.157719	291.17	237.858	53.3116	184.546	0.00841729	0.976249	-0.642942	0.00972722	0.634525	0.0110568	0.484931	0.0669307	0.725471	0.00220513	-0.205703	0.462041	0.157719	0.574536
Gpr4	blue	0.900948	-0.418648	0.404176	0.0297926	805.227	751.107	54.1199	696.987	0.204592	0.464516	-0.839066	9.21329e-05	0.634474	0.0110652	0.404176	0.135127	0.900948	4.5902e-06	-0.418648	0.120397	0.0297926	0.91606
2410002I01Rik	blue	0.9764	-0.577676	0.332785	0.110048	1315.35	1236.09	79.2576	1156.84	0.342415	0.211551	-0.976873	4.3256e-10	0.634458	0.0110679	0.332785	0.22552	0.9764	4.92791e-10	-0.577676	0.0241165	0.110048	0.69622
Nab2	blue	0.946764	-0.487913	0.397647	0.0229567	1067.91	999.963	67.9428	932.02	0.262153	0.345228	-0.896567	6.01582e-06	0.634413	0.0110752	0.397647	0.142156	0.946764	9.07744e-08	-0.487913	0.0650245	0.0229567	0.935277
Fam105a	blue	0.98905	-0.575262	0.342197	0.104929	1390.43	1309.27	81.1672	1228.1	0.340904	0.213706	-0.975132	6.90499e-10	0.634228	0.0111061	0.342197	0.211861	0.98905	3.45327e-12	-0.575262	0.0248552	0.104929	0.709771
Cercam	blue	0.664785	-0.118091	0.468492	-0.394359	242.802	183.997	58.8056	125.191	-0.0733742	0.794962	-0.5608	0.0296462	0.634174	0.0111151	0.468492	0.0781708	0.664785	0.00685351	-0.118091	0.6751	-0.394359	0.145788
Fam110a	blue	0.949274	-0.517712	0.392886	0.0737143	1102.2	1026.34	75.8632	950.479	0.280397	0.311416	-0.91414	1.87305e-06	0.633743	0.0111871	0.392886	0.147435	0.949274	6.67257e-08	-0.517712	0.0480778	0.0737143	0.79403
Rbbp6	blue	0.960525	-0.528126	0.354835	0.032941	1171.74	1104.36	67.381	1036.98	0.30716	0.265444	-0.940563	1.82985e-07	0.633403	0.0112441	0.354835	0.194366	0.960525	1.34342e-08	-0.528126	0.043005	0.032941	0.907223
Gm9897	blue	0.975646	-0.571458	0.338653	0.151681	1295.43	1217.32	78.1178	1139.2	0.341387	0.213016	-0.973525	1.03313e-09	0.632139	0.0114583	0.338653	0.216941	0.975646	6.03556e-10	-0.571458	0.0260536	0.151681	0.58945
Trove2	blue	0.959877	-0.522832	0.380234	0.0802519	1165.78	1093.63	72.1594	1021.47	0.290016	0.294392	-0.92176	1.04315e-06	0.631743	0.0115258	0.380234	0.162095	0.959877	1.49101e-08	-0.522832	0.0455314	0.0802519	0.776174
4732491K20Rik	blue	0.937997	-0.519816	0.359342	0.152632	1012.22	950.229	61.9873	888.241	0.280858	0.310586	-0.912098	2.17122e-06	0.63124	0.0116124	0.359342	0.18836	0.937997	2.39332e-07	-0.519816	0.0470188	0.152632	0.587091
Smad2	blue	0.971144	-0.544109	0.358266	0.0609678	1240.85	1168.12	72.7268	1095.4	0.312413	0.256934	-0.943282	1.3587e-07	0.630869	0.0116764	0.358266	0.189782	0.971144	1.79822e-09	-0.544109	0.0360066	0.0609678	0.829111
Nek3	blue	0.970274	-0.550296	0.36181	0.100824	1247.73	1171.64	76.0811	1095.56	0.312077	0.257473	-0.9429	1.41791e-07	0.630823	0.0116844	0.36181	0.185122	0.970274	2.17635e-09	-0.550296	0.0335405	0.100824	0.720698
Ildr1	blue	0.513924	0.152842	0.616239	-0.105943	202.214	83.8223	118.392	-34.5695	-0.278415	0.314993	-0.351952	0.198272	0.630367	0.0117636	0.616239	0.0144312	0.513924	0.0500281	0.152842	0.586572	-0.105943	0.707082
Reep4	blue	0.985001	-0.579679	0.330161	0.0623047	1370.51	1290.12	80.3832	1209.74	0.345728	0.206876	-0.976093	5.35633e-10	0.630365	0.011764	0.330161	0.229424	0.985001	2.64334e-11	-0.579679	0.0235162	0.0623047	0.825416
Fbxo10	blue	0.980178	-0.572117	0.331173	0.0146301	1334.48	1257.08	77.3972	1179.68	0.338709	0.216861	-0.96904	2.82695e-09	0.630331	0.0117699	0.331173	0.227914	0.980178	1.60011e-10	-0.572117	0.0258429	0.0146301	0.958729
Mepce	blue	0.97989	-0.583272	0.331332	0.0801016	1343.11	1262.16	80.9446	1181.22	0.344621	0.208431	-0.974413	8.29525e-10	0.629792	0.0118641	0.331332	0.227677	0.97989	1.75603e-10	-0.583272	0.0224682	0.0801016	0.776584
Csgalnact1	blue	0.939336	-0.475718	0.394853	0.0296074	1019.71	956.3	63.4146	892.886	0.251582	0.365723	-0.881224	1.42271e-05	0.629643	0.0118903	0.394853	0.145238	0.939336	2.08354e-07	-0.475718	0.0730756	0.0296074	0.91658
Pwwp2a	blue	0.95442	-0.522863	0.350596	0.140346	1133.22	1067.74	65.484	1002.26	0.310642	0.259784	-0.939912	1.96109e-07	0.62927	0.0119559	0.350596	0.200127	0.95442	3.37069e-08	-0.522863	0.0455163	0.140346	0.617861
Lbh	blue	0.972334	-0.566672	0.330741	0.0573215	1270.87	1195.76	75.1066	1120.66	0.337246	0.218979	-0.966107	5.05469e-09	0.628861	0.0120282	0.330741	0.228558	0.972334	1.37135e-09	-0.566672	0.0276236	0.0573215	0.839205
Dnaja4	blue	0.922466	-0.511355	0.321134	-0.114092	959.339	901.652	57.6876	843.964	0.286585	0.300401	-0.914997	1.75843e-06	0.628413	0.0121078	0.321134	0.243176	0.922466	9.85178e-07	-0.511355	0.0513836	-0.114092	0.685575
Arid1a	blue	0.978274	-0.567267	0.351608	0.159963	1311.61	1232.45	79.1649	1153.28	0.330672	0.228661	-0.959065	1.69509e-08	0.628393	0.0121112	0.351608	0.198741	0.978274	2.89177e-10	-0.567267	0.0274245	0.159963	0.569034
1700011H14Rik	blue	0.908393	-0.47549	0.377959	0.101804	859.95	804.407	55.5434	748.863	0.246085	0.376638	-0.874242	2.02666e-05	0.628157	0.0121534	0.377959	0.16483	0.908393	2.81368e-06	-0.47549	0.0732326	0.101804	0.718084
Sipa1l3	blue	0.974179	-0.571638	0.338426	0.0418342	1286.55	1209.59	76.9608	1132.63	0.326922	0.234301	-0.954902	3.1494e-08	0.62798	0.0121851	0.338426	0.21727	0.974179	8.79486e-10	-0.571638	0.025996	0.0418342	0.882319
Mfsd11	blue	0.980036	-0.581217	0.323394	0.0680123	1342.07	1262.97	79.0954	1183.88	0.350316	0.200512	-0.977258	3.88156e-10	0.626943	0.0123717	0.323394	0.239686	0.980036	1.67585e-10	-0.581217	0.0230633	0.0680123	0.809682
Fpr1	blue	0.853571	-0.348479	0.423232	0.126459	633.85	579.506	54.3433	525.163	0.16254	0.562743	-0.789321	0.00046686	0.626781	0.012401	0.423232	0.115972	0.853571	5.17313e-05	-0.348479	0.203044	0.126459	0.653364
Kdm2b	blue	0.958702	-0.547991	0.335587	0.0310865	1176.87	1107.73	69.1345	1038.6	0.323618	0.239343	-0.950083	6.02199e-08	0.626466	0.0124584	0.335587	0.221398	0.958702	1.79375e-08	-0.547991	0.034444	0.0310865	0.912427
Yeats2	blue	0.976421	-0.586565	0.318241	0.067114	1321.75	1241.69	80.0667	1161.62	0.353204	0.19657	-0.979121	2.23754e-10	0.625917	0.0125586	0.318241	0.247689	0.976421	4.89993e-10	-0.586565	0.0215393	0.067114	0.812154
Vpreb1	blue	0.943515	-0.514376	0.366833	0.188863	1055.68	992.261	63.4165	928.844	0.30419	0.270331	-0.93006	5.13592e-07	0.62587	0.0125672	0.366833	0.178644	0.943515	1.32353e-07	-0.514376	0.049792	0.188863	0.500239
C030034I22Rik	blue	0.942848	-0.528453	0.329398	0.104354	1074.94	1012.98	61.9577	951.024	0.310377	0.260213	-0.936013	2.9229e-07	0.625637	0.01261	0.329398	0.230568	0.942848	1.42616e-07	-0.528453	0.0428524	0.104354	0.711299
Scarf1	blue	0.888316	-0.432667	0.414518	0.159484	758.401	697.592	60.8084	636.784	0.212852	0.446271	-0.838375	9.4567e-05	0.625524	0.0126308	0.414518	0.124483	0.888316	9.70538e-06	-0.432667	0.10722	0.159484	0.570208
Stat5a	blue	-0.970913	0.585039	-0.311997	-0.0202816	1281.41	1202.65	78.757	1123.89	-0.349878	0.201114	0.975322	6.57155e-10	-0.625444	0.0126454	-0.311997	0.257601	-0.970913	1.89288e-09	0.585039	0.021966	-0.0202816	0.942807
Ing1	blue	0.953337	-0.548024	0.328536	0.0592016	1137.88	1071.99	65.8847	1006.11	0.308263	0.263644	-0.933666	3.67299e-07	0.625403	0.012653	0.328536	0.231863	0.953337	3.91667e-08	-0.548024	0.0344309	0.0592016	0.833997
2610301B20Rik	blue	0.967354	-0.568838	0.313417	0.0336589	1250.37	1177.11	73.2538	1103.86	0.338573	0.217057	-0.963409	8.26198e-09	0.624837	0.0127577	0.313417	0.255326	0.967354	3.97338e-09	-0.568838	0.0269046	0.0336589	0.905209
Med20	blue	0.976717	-0.590042	0.31414	0.133929	1321.81	1241.89	79.9233	1161.96	0.35106	0.19949	-0.975896	5.64699e-10	0.624836	0.0127579	0.31414	0.254173	0.976717	4.51713e-10	-0.590042	0.0205908	0.133929	0.634175
BC028528	blue	0.973331	-0.541667	0.354973	0.123273	1255.93	1185.04	70.8989	1114.14	0.320108	0.24477	-0.943723	1.29295e-07	0.623615	0.0129859	0.354973	0.194179	0.973331	1.08294e-09	-0.541667	0.0370164	0.123273	0.66161
Krt19	blue	0.875518	-0.447568	0.36002	-0.0888832	683.748	637.16	46.5886	590.571	0.216195	0.43899	-0.839744	8.9794e-05	0.623549	0.0129983	0.36002	0.187466	0.875518	1.90276e-05	-0.447568	0.0943498	-0.0888832	0.75276
1110034A24Rik	blue	0.978609	-0.597099	0.312907	0.0540486	1344.7	1261.46	83.2388	1178.22	0.357191	0.19121	-0.980578	1.40285e-10	0.623387	0.0130288	0.312907	0.256142	0.978609	2.61597e-10	-0.597099	0.0187638	0.0540486	0.848285
Adat1	blue	0.89175	-0.457265	0.406699	0.149688	799.803	733.963	65.84	668.123	0.225511	0.419021	-0.848885	6.27387e-05	0.623373	0.0130313	0.406699	0.132475	0.89175	7.99074e-06	-0.457265	0.0865829	0.149688	0.594408
LOC635918	blue	0.685483	-0.151078	0.547528	0.157718	353.848	215.763	138.086	77.6772	-0.0515777	0.855151	-0.571393	0.0260747	0.622971	0.0131075	0.547528	0.0346277	0.685483	0.00479211	-0.151078	0.590947	0.157718	0.57454
Frs3	blue	0.969647	-0.56021	0.343416	-0.0586741	1239.51	1166.66	72.8499	1093.81	0.330766	0.22852	-0.95369	3.73109e-08	0.622924	0.0131163	0.343416	0.210131	0.969647	2.48905e-09	-0.56021	0.0298555	-0.0586741	0.835458
Gm2568	blue	0.894126	-0.435688	0.411782	0.192131	796.586	733.39	63.1963	670.194	0.208101	0.456721	-0.83051	0.000126231	0.622409	0.0132141	0.411782	0.127242	0.894126	6.95802e-06	-0.435688	0.104517	0.192131	0.492713
Rgs12	blue	0.934154	-0.486599	0.393036	0.225399	989.503	926.753	62.7502	864.002	0.269599	0.331189	-0.891856	7.942e-06	0.622257	0.0132431	0.393036	0.147266	0.934154	3.50503e-07	-0.486599	0.0658595	0.225399	0.419259
Zswim3	blue	0.980887	-0.590421	0.329781	0.110844	1348.09	1265.1	82.9939	1182.11	0.354657	0.194606	-0.976857	4.34542e-10	0.6222	0.013254	0.329781	0.229993	0.980887	1.26508e-10	-0.590421	0.0204893	0.110844	0.694121
Rpusd1	blue	0.949273	-0.516962	0.381225	0.167922	1086.52	1017.05	69.4623	947.592	0.28775	0.298352	-0.909575	2.59344e-06	0.621825	0.0133258	0.381225	0.160913	0.949273	6.67338e-08	-0.516962	0.0484593	0.167922	0.5497
Fancf	blue	0.97728	-0.574429	0.330161	0.0887604	1307.89	1230.54	77.3544	1153.18	0.348552	0.202943	-0.970296	2.16624e-09	0.621744	0.0133413	0.330161	0.229424	0.97728	3.85797e-10	-0.574429	0.025114	0.0887604	0.753092
Prps1	blue	-0.963873	0.559776	-0.324251	-0.0320588	1215.43	1144.08	71.354	1072.72	-0.335979	0.220824	0.957176	2.26248e-08	-0.621196	0.0134468	-0.324251	0.238372	-0.963873	7.61362e-09	0.559776	0.03001	-0.0320588	0.909698
Kiss1r	blue	0.945148	-0.564647	0.294198	-0.0151502	1117.79	1050.27	67.5141	982.759	0.32867	0.231661	-0.949237	6.70368e-08	0.620566	0.0135689	0.294198	0.287166	0.945148	1.09812e-07	-0.564647	0.0283091	-0.0151502	0.957263
Ddit4l	blue	0.966968	-0.58105	0.314212	0.0512638	1254.11	1177.84	76.2708	1101.57	0.352794	0.197127	-0.972701	1.2586e-09	0.619907	0.0136976	0.314212	0.254058	0.966968	4.28499e-09	-0.58105	0.0231121	0.0512638	0.856025
4930444A02Rik	blue	0.958511	-0.588203	0.300232	0.0480862	1206.91	1131.49	75.4188	1056.07	0.342775	0.21104	-0.962318	9.97518e-09	0.619542	0.0137693	0.300232	0.276928	0.958511	1.84763e-08	-0.588203	0.0210884	0.0480862	0.864871
Arrb2	blue	0.979674	-0.571128	0.328602	0.0901655	1320.77	1244.77	76.0018	1168.77	0.34314	0.210522	-0.962496	9.67571e-09	0.619356	0.013806	0.328602	0.231763	0.979674	1.88155e-10	-0.571128	0.0261597	0.0901655	0.749298
Nlk	blue	0.974259	-0.590896	0.313733	-0.0110557	1307.96	1228.33	79.635	1148.69	0.357138	0.191281	-0.976112	5.32849e-10	0.618974	0.0138814	0.313733	0.254821	0.974259	8.62231e-10	-0.590896	0.0203627	-0.0110557	0.968807
Slbp	blue	0.980555	-0.572687	0.329276	0.0977936	1323.08	1247.46	75.6163	1171.85	0.341683	0.212593	-0.960352	1.38155e-08	0.618669	0.0139419	0.329276	0.23075	0.980555	1.41364e-10	-0.572687	0.0256617	0.0977936	0.728796
Gm3807	blue	0.667854	-0.109682	0.567433	0.0776767	337.865	197	140.865	56.1354	-0.0829735	0.768771	-0.535	0.0398816	0.617973	0.0140806	0.567433	0.0273693	0.667854	0.00651034	-0.109682	0.697186	0.0776767	0.783196
Cdkn1b	blue	0.964976	-0.568325	0.322278	0.114805	1218.6	1147.04	71.5627	1075.47	0.337604	0.21846	-0.955255	2.99521e-08	0.617651	0.0141452	0.322278	0.241406	0.964976	6.2402e-09	-0.568325	0.0270737	0.114805	0.683703
Drd4	blue	-0.712099	0.234185	-0.448137	-0.0694364	267.811	220.8	47.0105	173.79	-0.0555471	0.844125	0.672885	0.00597707	-0.617338	0.0142083	-0.448137	0.093881	-0.712099	0.00289827	0.234185	0.400862	-0.0694364	0.805766
Lyrm2	blue	0.971525	-0.602371	0.308288	0.0383746	1296.69	1213.91	82.7776	1131.13	0.357754	0.190461	-0.975067	7.02053e-10	0.617313	0.0142133	0.308288	0.263603	0.971525	1.65095e-09	-0.602371	0.0174824	0.0383746	0.891996
Hrct1	blue	0.980179	-0.601516	0.307803	0.057084	1356.71	1273.01	83.7043	1189.3	0.364423	0.181734	-0.981644	9.7441e-11	0.617222	0.0142317	0.307803	0.264393	0.980179	1.59973e-10	-0.601516	0.0176854	0.057084	0.839863
LOC100504462	blue	0.56516	-0.0151244	0.531646	0.732041	145.624	81.4776	64.146	17.3316	-0.159817	0.569391	-0.456772	0.0869669	0.616589	0.0143599	0.531646	0.0413839	0.56516	0.0281339	-0.0151244	0.957336	0.732041	0.00191719
Upk1b	blue	0.717955	-0.213045	0.499871	-0.0394361	297.64	229.314	68.3262	160.988	0.00616277	0.982609	-0.622651	0.013168	0.616488	0.0143803	0.499871	0.0577735	0.717955	0.002576	-0.213045	0.445848	-0.0394361	0.889025
Fancg	blue	0.926789	-0.50472	0.352712	0.162568	955.483	899.583	55.8996	843.684	0.286807	0.300009	-0.903043	4.01551e-06	0.616236	0.0144317	0.352712	0.197237	0.926789	6.85742e-07	-0.50472	0.0550085	0.162568	0.562675
1700042G15Rik	blue	0.686938	-0.140343	0.523957	0.16402	300.328	209.873	90.4553	119.417	-0.0685637	0.808165	-0.547156	0.0347758	0.615719	0.0145375	0.523957	0.0449858	0.686938	0.00466823	-0.140343	0.617868	0.16402	0.559143
Snord123	blue	0.983921	-0.598642	0.320016	0.0627863	1369.9	1285.91	83.9906	1201.92	0.362972	0.18361	-0.977956	3.17491e-10	0.614985	0.0146889	0.320016	0.244914	0.983921	4.14249e-11	-0.598642	0.0183816	0.0627863	0.824086
Eri2	blue	0.969418	-0.583155	0.320804	0.0308686	1264.16	1187.44	76.7132	1110.73	0.347401	0.20454	-0.962377	9.87496e-09	0.614976	0.0146907	0.320804	0.243688	0.969418	2.6119e-09	-0.583155	0.0225019	0.0308686	0.913039
Rttn	blue	0.925298	-0.496051	0.387226	0.245742	955.835	887.929	67.9053	820.024	0.264688	0.340412	-0.87911	1.58722e-05	0.614422	0.0148056	0.387226	0.153879	0.925298	7.78889e-07	-0.496051	0.0600224	0.245742	0.377324
Mapkbp1	blue	0.76915	-0.331382	0.40716	0.0314904	360.452	321.862	38.5897	283.272	0.0968705	0.731268	-0.711183	0.00295149	0.614312	0.0148284	0.40716	0.131995	0.76915	0.000802488	-0.331382	0.227603	0.0314904	0.911293
Hps6	blue	0.969353	-0.582301	0.304502	0.0507358	1275.24	1199.18	76.0589	1123.13	0.358999	0.188812	-0.973171	1.12555e-09	0.614172	0.0148577	0.304502	0.269816	0.969353	2.64823e-09	-0.582301	0.022748	0.0507358	0.857493
Wfs1	blue	0.952056	-0.584322	0.2916	-0.0334295	1150.76	1078.17	72.5848	1005.59	0.34087	0.213755	-0.954812	3.19003e-08	0.613942	0.0149058	0.2916	0.291643	0.952056	4.65564e-08	-0.584322	0.0221689	-0.0334295	0.905853
Olfr871	blue	0.646443	-0.119616	0.540127	0.445908	253.189	151.39	101.799	49.5913	-0.0697585	0.804881	-0.544115	0.0360041	0.613874	0.01492	0.540127	0.0376642	0.646443	0.00921246	-0.119616	0.671121	0.445908	0.0957264
Dffb	blue	0.913387	-0.488583	0.350939	0.203005	882.811	830.374	52.4364	777.938	0.282633	0.307408	-0.896452	6.05771e-06	0.613818	0.0149316	0.350939	0.199656	0.913387	1.97876e-06	-0.488583	0.0646015	0.203005	0.468062
Rfx3	blue	0.821753	-0.409702	0.354501	-0.160921	494.956	460.714	34.2414	426.473	0.181013	0.518534	-0.794809	0.000398899	0.613796	0.0149362	0.354501	0.194815	0.821753	0.000171255	-0.409702	0.129365	-0.160921	0.566692
Zfp712	blue	0.893636	-0.429776	0.403835	0.00783187	759.666	705.711	53.9553	651.756	0.222369	0.425704	-0.835657	0.000104669	0.613288	0.015043	0.403835	0.135489	0.893636	7.1615e-06	-0.429776	0.109851	0.00783187	0.9779
E130306D19Rik	blue	0.899684	-0.446406	0.389395	0.193399	793.901	741.132	52.7684	688.364	0.236864	0.395338	-0.850147	5.95997e-05	0.613283	0.015044	0.389395	0.151387	0.899684	4.96888e-06	-0.446406	0.0953117	0.193399	0.489807
Nkapl	blue	0.980576	-0.60008	0.309667	0.0839202	1355.23	1272.35	82.8795	1189.47	0.366953	0.178492	-0.980039	1.67381e-10	0.613087	0.0150854	0.309667	0.261362	0.980576	1.40371e-10	-0.60008	0.0180306	0.0839202	0.7662
Chst14	blue	0.955371	-0.560848	0.311023	0.0516059	1170.11	1100.89	69.2112	1031.68	0.339703	0.215428	-0.952775	4.22758e-08	0.613072	0.0150886	0.311023	0.259169	0.955371	2.9459e-08	-0.560848	0.0296291	0.0516059	0.855073
Oscp1	blue	0.711895	-0.212696	0.469871	0.402626	256.404	209.272	47.1319	162.14	0.0357837	0.899252	-0.648335	0.00894335	0.612551	0.0151989	0.469871	0.0771793	0.711895	0.00291008	-0.212696	0.446612	0.402626	0.136774
Micall2	blue	0.968068	-0.560266	0.320156	0.072751	1233.35	1164.3	69.0455	1095.26	0.333936	0.223822	-0.946079	9.84765e-08	0.612143	0.0152857	0.320156	0.244695	0.968068	3.44755e-09	-0.560266	0.0298356	0.072751	0.79667
Slc4a4	blue	-0.951818	0.551545	-0.350008	-0.135961	1115.4	1044.38	71.0182	973.363	-0.312087	0.257457	0.924214	8.53107e-07	-0.612127	0.0152891	-0.350008	0.200934	-0.951818	4.80494e-08	0.551545	0.0330582	-0.135961	0.628993
2900005J15Rik	blue	0.959326	-0.559643	0.338149	0.106548	1169.74	1099.66	70.0789	1029.58	0.33725	0.218973	-0.94915	6.77727e-08	0.6119	0.0153377	0.338149	0.21767	0.959326	1.62711e-08	-0.559643	0.0300576	0.106548	0.705476
Pdrg1	blue	0.965472	-0.587975	0.313699	0.0908108	1245.39	1169.05	76.3376	1092.72	0.356467	0.192177	-0.96756	3.8154e-09	0.611093	0.0155109	0.313699	0.254876	0.965472	5.69475e-09	-0.587975	0.0211508	0.0908108	0.747557
Casp12	blue	0.757109	-0.230823	0.479677	0.106875	369.312	308.852	60.4594	248.393	0.036503	0.897237	-0.647498	0.00906167	0.610995	0.0155322	0.479677	0.0703871	0.757109	0.001082	-0.230823	0.40785	0.106875	0.704611
Pygb	blue	0.976417	-0.579048	0.322328	0.0397047	1296.29	1220.34	75.9491	1144.39	0.348696	0.202744	-0.959599	1.5586e-08	0.610902	0.0155521	0.322328	0.241328	0.976417	4.90567e-10	-0.579048	0.0237041	0.0397047	0.888273
Spata24	blue	0.721381	-0.240327	0.432496	-0.198781	262.594	223.333	39.2609	184.072	0.0348656	0.901826	-0.645664	0.00932514	0.610798	0.0155747	0.432496	0.107373	0.721381	0.00240122	-0.240327	0.388258	-0.198781	0.477565
Gpsm1	blue	0.626962	-0.0808269	0.547401	0.124671	233.971	139.85	94.1211	45.7284	-0.117729	0.676047	-0.492312	0.0622844	0.610041	0.0157391	0.547401	0.0346781	0.626962	0.0123683	-0.0808269	0.774609	0.124671	0.657987
Zmynd17	blue	0.757802	-0.299615	0.392549	0.418146	319.812	287.003	32.8088	254.194	0.103239	0.714265	-0.713155	0.0028379	0.609917	0.0157663	0.392549	0.147813	0.757802	0.00106403	-0.299615	0.277964	0.418146	0.120889
Hapln4	blue	0.913057	-0.541342	0.321417	0.0120308	884.616	827.108	57.508	769.6	0.296416	0.283377	-0.905868	3.33662e-06	0.609452	0.0158681	0.321417	0.242737	0.913057	2.02662e-06	-0.541342	0.0371524	0.0120308	0.966057
Zmynd10	blue	0.796035	-0.302494	0.442579	0.0899639	424.775	378.013	46.7621	331.251	0.117	0.677954	-0.726326	0.00216582	0.609326	0.0158957	0.442579	0.0985309	0.796035	0.000384882	-0.302494	0.273146	0.0899639	0.749842
Fbxl8	blue	0.977839	-0.599336	0.319801	0.0589943	1334.82	1251.25	83.5709	1167.68	0.368391	0.176666	-0.977636	3.48453e-10	0.609245	0.0159136	0.319801	0.245249	0.977839	3.28583e-10	-0.599336	0.0182117	0.0589943	0.834571
Nr3c2	blue	-0.927363	0.513397	-0.339339	-0.0942454	957.977	902.951	55.0253	847.926	-0.286956	0.299747	0.896029	6.21382e-06	-0.609073	0.0159515	-0.339339	0.215952	-0.927363	6.52487e-07	0.513397	0.0503039	-0.0942454	0.738312
Tspan6	blue	0.50356	0.0537752	0.477995	-0.0909947	106.619	58.6046	48.0142	10.5904	-0.235155	0.398855	-0.373214	0.170633	0.608369	0.0161072	0.477995	0.071521	0.50356	0.0556611	0.0537752	0.849044	-0.0909947	0.747061
Gpr146	blue	-0.963263	0.595007	-0.30738	-0.072044	1223.89	1145.53	78.3585	1067.18	-0.358041	0.19008	0.966355	4.82192e-09	-0.608314	0.0161194	-0.30738	0.265085	-0.963263	8.47596e-09	0.595007	0.019292	-0.072044	0.798608
Hip1	blue	0.958039	-0.542579	0.331291	0.0674713	1154.88	1090.69	64.1899	1026.5	0.32463	0.237791	-0.932435	4.127e-07	0.607805	0.0162329	0.331291	0.227738	0.958039	1.98628e-08	-0.542579	0.0366371	0.0674713	0.811171
8430427H17Rik	blue	0.960677	-0.589679	0.311833	0.0758428	1221.03	1144.42	76.6065	1067.82	0.35447	0.194857	-0.962214	1.01515e-08	0.607744	0.0162465	0.311833	0.257865	0.960677	1.31063e-08	-0.589679	0.0206884	0.0758428	0.788206
Gfra2	blue	0.953274	-0.529677	0.359771	0.170997	1114.45	1048.36	66.0923	982.265	0.311425	0.258522	-0.91893	1.30502e-06	0.607505	0.0162999	0.359771	0.187794	0.953274	3.95032e-08	-0.529677	0.0422849	0.170997	0.542306
H2afy3	blue	0.951858	-0.547384	0.334768	0.207472	1117.21	1052.39	64.8213	987.567	0.32069	0.243865	-0.926721	6.89758e-07	0.606032	0.0166328	0.334768	0.222598	0.951858	4.77971e-08	-0.547384	0.034685	0.207472	0.458113
Mpzl1	blue	0.967647	-0.572788	0.319183	0.0801999	1239.3	1166.66	72.6478	1094.01	0.348994	0.202333	-0.954941	3.13214e-08	0.605947	0.016652	0.319183	0.246213	0.967647	3.75035e-09	-0.572788	0.0256296	0.0801999	0.776316
Dip2a	blue	0.981366	-0.599263	0.308391	0.0669268	1347.1	1265.56	81.5444	1184.01	0.367892	0.177298	-0.973245	1.10575e-09	0.605353	0.0167879	0.308391	0.263435	0.981366	1.07373e-10	-0.599263	0.0182294	0.0669268	0.812669
Col5a2	blue	0.878238	-0.447122	0.351016	-0.0336336	698.462	654.843	43.6188	611.225	0.248522	0.371778	-0.853874	5.1079e-05	0.605352	0.016788	0.351016	0.199551	0.878238	1.65951e-05	-0.447122	0.0947177	-0.0336336	0.90528
Zfp558	blue	0.842169	-0.417724	0.385057	-0.130074	544.128	502.057	42.0709	459.986	0.194865	0.486458	-0.799248	0.00035004	0.604383	0.0170114	0.385057	0.156397	0.842169	8.18246e-05	-0.417724	0.121303	-0.130074	0.644052
Ccbp2	blue	0.695652	-0.158963	0.494923	0.309265	260.043	202.504	57.539	144.965	-0.0303142	0.914595	-0.574017	0.0252428	0.604331	0.0170235	0.494923	0.0606988	0.695652	0.00397845	-0.158963	0.571483	0.309265	0.262015
Mbnl3	blue	0.563072	0.037269	0.547821	-0.00666956	167.647	96.6274	71.0197	25.6077	-0.211893	0.448371	-0.3924	0.14798	0.604293	0.0170322	0.547821	0.0345112	0.563072	0.0288506	0.037269	0.895092	-0.00666956	0.98118
Il17rd	blue	0.920042	-0.506184	0.354454	0.0349888	908.215	853.882	54.3335	799.548	0.296467	0.283289	-0.899482	5.03184e-06	0.603015	0.0173306	0.354454	0.194879	0.920042	1.1962e-06	-0.506184	0.0541929	0.0349888	0.90148
Gsg1	blue	-0.477265	-0.0683377	-0.480884	0.243313	88.9428	46.0509	42.8919	3.15897	0.246005	0.376798	0.356983	0.191488	-0.602988	0.0173368	-0.480884	0.069582	-0.477265	0.0720164	-0.0683377	0.808787	0.243313	0.382208
Zmym1	blue	0.978589	-0.618344	0.290471	0.0450508	1360.42	1272.44	87.9743	1184.47	0.386113	0.155167	-0.989058	3.43624e-12	0.602945	0.017347	0.290471	0.293601	0.978589	2.63145e-10	-0.618344	0.0140065	0.0450508	0.873335
LOC100040377	blue	0.957658	-0.55075	0.340868	0.181663	1143.73	1076.08	67.6548	1008.42	0.329912	0.229797	-0.932308	4.17608e-07	0.602397	0.0174763	0.340868	0.213757	0.957658	2.10454e-08	-0.55075	0.0333646	0.181663	0.517007
Lmln	blue	0.965595	-0.597026	0.308201	0.0144764	1249.67	1170.07	79.6012	1090.47	0.367859	0.17734	-0.97016	2.23061e-09	0.602301	0.0174989	0.308201	0.263744	0.965595	5.56598e-09	-0.597026	0.0187823	0.0144764	0.959162
Dnalc4	blue	0.963959	-0.595322	0.31254	0.115485	1234.34	1155.87	78.4676	1077.4	0.35706	0.191385	-0.959307	1.63207e-08	0.602247	0.0175116	0.31254	0.256729	0.963959	7.497e-09	-0.595322	0.0192118	0.115485	0.681921
Zscan29	blue	0.852292	-0.426572	0.401507	0.0248291	611.259	559.401	51.8583	507.543	0.220891	0.428866	-0.823019	0.000164036	0.602128	0.0175399	0.401507	0.137971	0.852292	5.4564e-05	-0.426572	0.112819	0.0248291	0.93001
Iqce	blue	0.970896	-0.599282	0.30291	0.0695347	1288.43	1208.45	79.9805	1128.47	0.360662	0.186623	-0.962781	9.21458e-09	0.602119	0.0175419	0.30291	0.272454	0.970896	1.89987e-09	-0.599282	0.0182248	0.0695347	0.805496
9930021D14Rik	blue	0.847133	-0.413187	0.387604	0.148525	566.873	524.617	42.256	482.361	0.217097	0.437037	-0.818794	0.00018916	0.601697	0.0176423	0.387604	0.153442	0.847133	6.73211e-05	-0.413187	0.12582	0.148525	0.597307
Trim32	blue	0.973227	-0.593854	0.304011	0.0872217	1302.74	1223.95	78.7898	1145.16	0.375438	0.167896	-0.976953	4.23026e-10	0.601514	0.0176858	0.304011	0.270628	0.973227	1.11048e-09	-0.593854	0.0195879	0.0872217	0.757252
5430403G16Rik	blue	0.978323	-0.599004	0.319326	0.0828997	1333.12	1249.95	83.1647	1166.79	0.364194	0.182028	-0.965684	5.47368e-09	0.60149	0.0176917	0.319326	0.24599	0.978323	2.84977e-10	-0.599004	0.0182928	0.0828997	0.768972
Crocc	blue	0.961202	-0.587303	0.314259	0.0840789	1217.63	1141	76.6279	1064.37	0.347111	0.204945	-0.948027	7.78919e-08	0.600917	0.0178289	0.314259	0.253982	0.961202	1.20255e-08	-0.587303	0.0213354	0.0840789	0.765769
Etv5	blue	0.963253	-0.588536	0.289007	0.112709	1228.05	1154.14	73.9136	1080.22	0.362679	0.183991	-0.962988	8.89153e-09	0.600309	0.0179753	0.289007	0.296153	0.963253	8.49082e-09	-0.588536	0.0209978	0.112709	0.689209
6430571L13Rik	blue	-0.844294	0.449114	-0.319412	-0.122227	569.043	531.551	37.492	494.059	-0.233997	0.401251	0.833909	0.000111623	-0.599912	0.0180714	-0.319412	0.245856	-0.844294	7.53276e-05	0.449114	0.0930793	-0.122227	0.664325
Tbx2	blue	0.94682	-0.55228	0.301355	0.127893	1099.66	1037.91	61.747	976.164	0.330769	0.228516	-0.92986	5.22974e-07	0.599091	0.0182716	0.301355	0.275046	0.94682	9.01638e-08	-0.55228	0.0327771	0.127893	0.649663
Spin2	blue	0.920164	-0.561508	0.282192	0.240492	961.687	900.862	60.8252	840.037	0.333874	0.223912	-0.932487	4.10683e-07	0.598612	0.0183889	0.282192	0.308196	0.920164	1.18476e-06	-0.561508	0.0293965	0.240492	0.387921
P2ry14	blue	0.948018	-0.547367	0.317281	0.0876451	1093.36	1031.35	62.0104	969.344	0.332174	0.226426	-0.930659	4.86373e-07	0.598485	0.0184201	0.317281	0.249196	0.948018	7.79825e-08	-0.547367	0.0346918	0.0876451	0.756107
Iglon5	blue	0.952035	-0.570494	0.311685	0.171866	1123.49	1056.55	66.941	989.608	0.343471	0.210053	-0.941943	1.57616e-07	0.598471	0.0184237	0.311685	0.258103	0.952035	4.66902e-08	-0.570494	0.0263645	0.171866	0.540224
Zscan18	blue	0.779305	-0.340253	0.396448	0.511492	359.258	325.159	34.0989	291.06	0.1343	0.633228	-0.732757	0.00188772	0.598457	0.018427	0.396448	0.143474	0.779305	0.000615134	-0.340253	0.214638	0.511492	0.0513104
Dedd2	blue	0.952506	-0.586461	0.288404	0.148467	1160.02	1088.77	71.2526	1017.51	0.35483	0.194373	-0.953211	3.98451e-08	0.598381	0.0184458	0.288404	0.297206	0.952506	4.38378e-08	-0.586461	0.0215683	0.148467	0.597452
Rapgef4	blue	-0.929568	0.56469	-0.297785	-0.055995	985.076	923.298	61.7777	861.52	-0.324779	0.237563	0.922993	9.43636e-07	-0.598214	0.018487	-0.297785	0.281053	-0.929568	5.36897e-07	0.56469	0.0282941	-0.055995	0.842883
Rcan3	blue	0.976612	-0.607484	0.309362	0.0682619	1327.78	1243.63	84.1464	1159.48	0.37784	0.164974	-0.976046	5.42514e-10	0.598206	0.018489	0.309362	0.261856	0.976612	4.65014e-10	-0.607484	0.0163046	0.0682619	0.808995
LOC100502632	blue	0.978866	-0.610384	0.304523	0.12803	1352.27	1267.17	85.1031	1182.06	0.379332	0.163175	-0.977188	3.95961e-10	0.597856	0.0185757	0.304523	0.26978	0.978866	2.41948e-10	-0.610384	0.0156646	0.12803	0.64931
Fam109a	blue	0.969299	-0.605267	0.290842	0.0338812	1285.9	1205.57	80.3249	1125.25	0.372853	0.171079	-0.970572	2.03987e-09	0.597719	0.0186095	0.290842	0.292957	0.969299	2.67794e-09	-0.605267	0.0168076	0.0338812	0.904586
Irs2	blue	-0.961291	0.584245	-0.303711	0.0375334	1201.15	1128.33	72.8154	1055.52	-0.361358	0.185712	0.958993	1.71442e-08	-0.597635	0.0186305	-0.303711	0.271124	-0.961291	1.18507e-08	0.584245	0.0221907	0.0375334	0.894351
Arhgef18	blue	0.9662	-0.599075	0.304096	0.0776996	1259.62	1180.77	78.8548	1101.91	0.373872	0.169819	-0.971464	1.67357e-09	0.597592	0.0186411	0.304096	0.270486	0.9662	4.96685e-09	-0.599075	0.0182755	0.0776996	0.783133
Ppp1r13b	blue	0.97621	-0.597792	0.299311	0.126612	1320.93	1241.81	79.118	1162.69	0.375519	0.167797	-0.971417	1.69129e-09	0.595898	0.0190657	0.299311	0.278476	0.97621	5.18957e-10	-0.597792	0.0185914	0.126612	0.652968
Bckdk	blue	0.971154	-0.624575	0.282572	0.0553327	1320.1	1231.94	88.1595	1143.78	0.386558	0.154651	-0.982032	8.491e-11	0.595473	0.0191733	0.282572	0.307518	0.971154	1.79397e-09	-0.624575	0.0128063	0.0553327	0.84472
LOC100503330	blue	0.758045	-0.329523	0.348189	0.0794439	369.553	332.446	37.1067	295.339	0.155867	0.579094	-0.751028	0.00125045	0.595161	0.0192528	0.348189	0.203446	0.758045	0.00105778	-0.329523	0.23038	0.0794439	0.778376
Hoxa5	blue	0.959366	-0.560226	0.329182	0.0810241	1168.3	1100.56	67.7469	1032.81	0.346862	0.205291	-0.941211	1.70669e-07	0.594349	0.0194604	0.329182	0.230892	0.959366	1.61685e-08	-0.560226	0.0298498	0.0810241	0.774072
Ear12	blue	-0.555683	0.146506	-0.415269	0.152908	100.111	71.6213	28.4899	43.1313	0.0736988	0.794073	0.519555	0.0471495	-0.593254	0.0197433	-0.415269	0.123733	-0.555683	0.031498	0.146506	0.602355	0.152908	0.586408
Zbtb34	blue	0.94146	-0.562112	0.282875	-0.0316798	1086.81	1023.4	63.412	959.99	0.344468	0.208647	-0.937465	2.52674e-07	0.592998	0.0198098	0.282875	0.306976	0.94146	1.66126e-07	-0.562112	0.029185	-0.0316798	0.910762
Syt11	blue	0.974276	-0.627097	0.280683	0.0904797	1342.76	1253.34	89.423	1163.92	0.393195	0.147087	-0.985531	2.09446e-11	0.592336	0.0199827	0.280683	0.310901	0.974276	8.58588e-10	-0.627097	0.0123438	0.0904797	0.74845
Sftpa1	blue	-0.614103	0.123096	-0.442393	-0.378085	145.26	109.735	35.5245	74.2108	0.0600086	0.831764	0.531782	0.0413219	-0.591791	0.0201259	-0.442393	0.0986886	-0.614103	0.014872	0.123096	0.662071	-0.378085	0.164678
A830007P12Rik	blue	0.98298	-0.623455	0.286639	0.0516968	1395.93	1307	88.9343	1218.06	0.395312	0.144728	-0.986567	1.29591e-11	0.591255	0.0202676	0.286639	0.300304	0.98298	5.98179e-11	-0.623455	0.0130159	0.0516968	0.85482
Gm7120	blue	-0.579665	0.0886867	-0.487571	0.140851	125.747	81.438	44.3092	37.1288	0.112338	0.690186	0.478341	0.0712867	-0.590678	0.0204207	-0.487571	0.0652411	-0.579665	0.0235204	0.0886867	0.753291	0.140851	0.616585
Kctd21	blue	0.967061	-0.609408	0.28971	-0.00224197	1278.31	1196.93	81.3841	1115.54	0.387334	0.153753	-0.977895	3.23227e-10	0.590561	0.020452	0.28971	0.294926	0.967061	4.20851e-09	-0.609408	0.0158778	-0.00224197	0.993673
Zscan20	blue	0.975914	-0.621135	0.287337	0.12167	1344.29	1256.86	87.4321	1169.43	0.395729	0.144267	-0.986109	1.60927e-11	0.59038	0.0205003	0.287337	0.299077	0.975914	5.61944e-10	-0.621135	0.0134586	0.12167	0.665773
Fbxl16	blue	0.942686	-0.557947	0.33646	0.055134	1072.66	1005.05	67.6095	937.445	0.34075	0.213927	-0.931017	4.70688e-07	0.590267	0.0205304	0.33646	0.220123	0.942686	1.45214e-07	-0.557947	0.0306683	0.055134	0.845271
Dgcr8	blue	0.974214	-0.627151	0.27493	0.0552729	1346.5	1257.81	88.6888	1169.12	0.396405	0.143521	-0.986654	1.2425e-11	0.590249	0.0205353	0.27493	0.32134	0.974214	8.7201e-10	-0.627151	0.0123341	0.0552729	0.844886
Crb3	blue	0.95708	-0.603042	0.304983	0.0862438	1207.29	1126.28	81.0085	1045.27	0.36498	0.181017	-0.955215	3.01239e-08	0.590235	0.020539	0.304983	0.269021	0.95708	2.29497e-08	-0.603042	0.0173243	0.0862438	0.7599
Zfp605	blue	0.586273	-0.105466	0.493342	0.225642	146.361	88.1394	58.2218	29.9176	-0.0968262	0.731387	-0.492997	0.0618654	0.589823	0.0206495	0.493342	0.0616553	0.586273	0.0216205	-0.105466	0.708347	0.225642	0.418744
Asb7	blue	0.967885	-0.631529	0.266802	0.0743267	1311.47	1221.58	89.8941	1131.68	0.396368	0.143562	-0.986156	1.57477e-11	0.589788	0.020659	0.266802	0.336424	0.967885	3.57682e-09	-0.631529	0.0115627	0.0743267	0.792353
Gpr101	blue	0.539626	0.00335176	0.544708	0.0323619	146.295	72.8833	73.4117	-0.528399	-0.181381	0.517669	-0.408088	0.13103	0.58947	0.0207447	0.544708	0.0357624	0.539626	0.0378768	0.00335176	0.990541	0.0323619	0.908847
Akr1b10	blue	0.945998	-0.542065	0.313825	0.120667	1082.34	1022.36	59.9784	962.385	0.334958	0.222319	-0.924133	8.58851e-07	0.589176	0.0208241	0.313825	0.254675	0.945998	9.94212e-08	-0.542065	0.0368505	0.120667	0.668384
Pcdhb17	blue	0.812528	-0.323766	0.399236	0.132539	487.949	447.027	40.9218	406.105	0.134141	0.633633	-0.723095	0.00231742	0.588954	0.0208842	0.399236	0.140423	0.812528	0.000232166	-0.323766	0.239115	0.132539	0.63773
BC052040	blue	0.942386	-0.589089	0.290669	0.113111	1099.97	1028.99	70.9852	958	0.346657	0.205578	-0.935201	3.16648e-07	0.588544	0.0209955	0.290669	0.293257	0.942386	1.50112e-07	-0.589089	0.0208477	0.113111	0.688152
Gm4588	blue	-0.884297	0.494152	-0.32406	-0.130533	719.582	676.615	42.9671	633.648	-0.266398	0.337184	0.854809	4.91092e-05	-0.588411	0.0210318	-0.32406	0.238664	-0.884297	1.20908e-05	0.494152	0.0611636	-0.130533	0.642873
Cpeb2	blue	0.957735	-0.592018	0.299465	0.0866303	1189.29	1114.76	74.5315	1040.23	0.37542	0.167918	-0.963193	8.58003e-09	0.587773	0.0212062	0.299465	0.278217	0.957735	2.08022e-08	-0.592018	0.0200661	0.0866303	0.758853
Naip6	blue	0.89162	-0.475256	0.340037	0.0391172	763.765	719.11	44.6544	674.456	0.274041	0.32297	-0.861637	3.65304e-05	0.587596	0.0212546	0.340037	0.214949	0.89162	8.05041e-06	-0.475256	0.0733937	0.0391172	0.889917
Rilpl1	blue	0.97435	-0.603751	0.304349	0.114569	1306.18	1224.91	81.2658	1143.64	0.381255	0.160878	-0.968699	3.03253e-09	0.587445	0.0212964	0.304349	0.270068	0.97435	8.42784e-10	-0.603751	0.0171582	0.114569	0.684322
Prrg3	blue	0.849962	-0.419883	0.397587	0.199471	598.45	546.967	51.4832	495.484	0.210378	0.451698	-0.797476	0.00036892	0.587098	0.0213918	0.397587	0.142222	0.849962	6.00507e-05	-0.419883	0.119193	0.199471	0.476008
Gm11677	blue	0.944122	-0.586558	0.278983	0.0529473	1106.34	1038.63	67.7122	970.915	0.353489	0.196183	-0.940466	1.84896e-07	0.586977	0.0214253	0.278983	0.313964	0.944122	1.23569e-07	-0.586558	0.0215414	0.0529473	0.851344
Chrdl2	blue	0.746157	-0.364169	0.332677	-0.122626	311.18	282.265	28.9151	253.349	0.166222	0.553804	-0.752391	0.00121096	0.586169	0.0216496	0.332677	0.225681	0.746157	0.00140011	-0.364169	0.182061	-0.122626	0.663288
G6pc3	blue	0.973507	-0.625259	0.278376	0.0522573	1328.65	1241.44	87.2157	1154.22	0.388242	0.152708	-0.974086	9.001e-10	0.585844	0.0217402	0.278376	0.315064	0.973507	1.03769e-09	-0.625259	0.0126795	0.0522573	0.853262
1500010J02Rik	blue	0.970462	-0.603946	0.287472	0.078334	1282.35	1203.73	78.6292	1125.1	0.375587	0.167714	-0.961114	1.22008e-08	0.585528	0.0218288	0.287472	0.298841	0.970462	2.0894e-09	-0.603946	0.0171128	0.078334	0.781402
3110052M02Rik	blue	0.930357	-0.577011	0.266614	0.000472466	1040.69	974.765	65.922	908.843	0.360642	0.18665	-0.945888	1.00717e-07	0.585246	0.0219078	0.266614	0.336778	0.930357	4.99928e-07	-0.577011	0.0243182	0.000472466	0.998667
Etohi1	blue	0.903314	-0.543452	0.331187	0.112091	866.521	805.42	61.101	744.319	0.313559	0.255098	-0.897975	5.5224e-06	0.584415	0.0221425	0.331187	0.227893	0.903314	3.94575e-06	-0.543452	0.0362763	0.112091	0.690835
Rab40c	blue	0.981065	-0.634342	0.276924	0.0899183	1397.82	1305.11	92.7105	1212.4	0.407135	0.132021	-0.991256	8.04168e-13	0.584121	0.0222258	0.276924	0.317699	0.981065	1.19103e-10	-0.634342	0.0110871	0.0899183	0.749965
Rassf9	blue	0.762761	-0.350949	0.363549	0.0390021	321.105	293.805	27.3005	266.505	0.137707	0.624551	-0.721654	0.00238771	0.583947	0.0222754	0.363549	0.182862	0.762761	0.000942364	-0.350949	0.199643	0.0390021	0.89024
Fgf21	blue	0.971848	-0.631906	0.27569	0.0464303	1319.52	1229.51	90.013	1139.5	0.400827	0.138702	-0.984454	3.33183e-11	0.583627	0.0223668	0.27569	0.319948	0.971848	1.53411e-09	-0.631906	0.011498	0.0464303	0.869487
Tcea2	blue	0.683918	-0.255944	0.404698	0.286248	201.82	173.143	28.6772	144.466	0.062263	0.825532	-0.645379	0.00936654	0.583116	0.0225129	0.404698	0.134576	0.683918	0.00492823	-0.255944	0.357187	0.286248	0.300993
Per2	blue	0.928835	-0.577463	0.29655	-0.0054695	1015.79	949.565	66.2236	883.342	0.34335	0.210225	-0.926059	7.30095e-07	0.582709	0.02263	0.29655	0.283149	0.928835	5.73226e-07	-0.577463	0.0241808	-0.0054695	0.984566
Gnpda2	blue	0.965758	-0.599	0.301745	0.134911	1241.74	1163.22	78.5211	1084.7	0.367359	0.177975	-0.949883	6.1774e-08	0.582525	0.0226833	0.301745	0.274395	0.965758	5.39833e-09	-0.599	0.0182937	0.134911	0.631669
Csrnp2	blue	0.95753	-0.617408	0.269939	0.0459645	1222.11	1140.4	81.712	1058.69	0.389023	0.151813	-0.971281	1.74396e-09	0.582258	0.0227603	0.269939	0.330555	0.95753	2.1454e-08	-0.617408	0.0141942	0.0459645	0.870786
Zfp462	blue	0.815125	-0.397252	0.321175	0.105386	497.305	461.48	35.8256	425.654	0.206692	0.459842	-0.788648	0.000475808	0.581956	0.022848	0.321175	0.243112	0.815125	0.000213459	-0.397252	0.142589	0.105386	0.70856
Scd2	blue	0.965483	-0.613867	0.285988	0.0565726	1253.02	1171.69	81.3332	1090.35	0.379605	0.162849	-0.961298	1.1836e-08	0.581693	0.0229242	0.285988	0.301453	0.965483	5.68232e-09	-0.613867	0.0149213	0.0565726	0.841281
2310011J03Rik	blue	0.973925	-0.628169	0.281714	0.112099	1335.06	1246.36	88.6977	1157.66	0.398424	0.141307	-0.979678	1.87924e-10	0.581254	0.0230524	0.281714	0.309052	0.973925	9.36876e-10	-0.628169	0.0121512	0.112099	0.690814
Msl3l2	blue	0.912281	-0.528199	0.341976	0.193153	892.368	832.095	60.2723	771.823	0.295267	0.285336	-0.875977	1.85971e-05	0.58071	0.0232117	0.341976	0.212176	0.912281	2.14296e-06	-0.528199	0.0429711	0.193153	0.490371
Atoh8	blue	0.951834	-0.598862	0.279184	0.181531	1163.75	1089.33	74.4211	1014.91	0.381616	0.160449	-0.961359	1.17165e-08	0.579744	0.0234971	0.279184	0.313602	0.951834	4.79523e-08	-0.598862	0.0183275	0.181531	0.517317
Olfr212	blue	0.796132	-0.369618	0.423004	0.168986	476.431	406.363	70.0681	336.295	0.155961	0.578863	-0.735545	0.00177647	0.579584	0.0235445	0.423004	0.116189	0.796132	0.000383791	-0.369618	0.175118	0.168986	0.547137
Wdr47	blue	0.963818	-0.620158	0.285325	0.0695997	1268.09	1183.14	84.9511	1098.19	0.39095	0.149618	-0.970521	2.06291e-09	0.579571	0.0235483	0.285325	0.302625	0.963818	7.68715e-09	-0.620158	0.0136485	0.0695997	0.805318
Unc5a	blue	0.973134	-0.62271	0.270482	0.0843315	1327.4	1242.23	85.1713	1157.06	0.400771	0.138762	-0.980008	1.69065e-10	0.579237	0.0236477	0.270482	0.329545	0.973134	1.13559e-09	-0.62271	0.0131569	0.0843315	0.765084
Parp16	blue	0.930077	-0.54635	0.331038	0.182554	995.434	931.282	64.1521	867.13	0.316728	0.250068	-0.89582	6.292e-06	0.579092	0.0236909	0.331038	0.228115	0.930077	5.12787e-07	-0.54635	0.0350983	0.182554	0.514919
Napepld	blue	0.958144	-0.634848	0.259754	-0.0338361	1247.94	1159.33	88.609	1070.73	0.397037	0.142825	-0.975592	6.12123e-10	0.578555	0.0238514	0.259754	0.349822	0.958144	1.95447e-08	-0.634848	0.0110033	-0.0338361	0.904712
A930033H14Rik	blue	0.838131	-0.455587	0.345728	0.365915	541.481	503.398	38.0825	465.316	0.242104	0.384651	-0.820629	0.000177885	0.578525	0.0238606	0.345728	0.206877	0.838131	9.54397e-05	-0.455587	0.0878936	0.365915	0.179816
Gm3852	blue	0.973918	-0.61927	0.282016	0.140263	1322.22	1237.94	84.2862	1153.65	0.396606	0.1433	-0.974664	7.78407e-10	0.578059	0.0240007	0.282016	0.308511	0.973918	9.38365e-10	-0.61927	0.013823	0.140263	0.618071
Stxbp4	blue	0.901086	-0.513549	0.319711	0.0378897	811.887	763.202	48.6846	714.517	0.28446	0.304157	-0.86224	3.55631e-05	0.57778	0.0240849	0.319711	0.245389	0.901086	4.55032e-06	-0.513549	0.0502241	0.0378897	0.893353
Klhl20	blue	0.96858	-0.629812	0.273728	0.0975714	1307.46	1219.05	88.4125	1130.64	0.40781	0.131319	-0.985505	2.11938e-11	0.577694	0.0241108	0.273728	0.323546	0.96858	3.10763e-09	-0.629812	0.0118606	0.0975714	0.729391
Ttc14	blue	0.942655	-0.583022	0.270653	0.0557199	1096.43	1029.72	66.7008	963.024	0.368241	0.176855	-0.945904	1.00532e-07	0.577662	0.0241205	0.270653	0.329229	0.942655	1.45708e-07	-0.583022	0.02254	0.0557199	0.843646
Vps33a	blue	0.971853	-0.637761	0.264894	0.0741326	1339.22	1247.11	92.109	1155	0.406085	0.133118	-0.983718	4.49315e-11	0.577633	0.0241294	0.264894	0.340023	0.971853	1.53223e-09	-0.637761	0.0105298	0.0741326	0.792885
Pdhx	blue	-0.966065	0.615872	-0.275412	-0.15443	1265.6	1183.48	82.1249	1101.35	-0.398056	0.141709	0.975682	5.97792e-10	-0.577626	0.0241313	-0.275412	0.320457	-0.966065	5.09523e-09	0.615872	0.0145063	-0.15443	0.582641
Gm14957	blue	0.55184	-0.058443	0.480564	-0.227062	107.127	65.6935	41.433	24.2605	-0.121852	0.665301	-0.455285	0.0881306	0.577137	0.0242798	0.480564	0.0697949	0.55184	0.032945	-0.058443	0.836098	-0.227062	0.415745
Tenc1	blue	-0.967309	0.635162	-0.274855	-0.097051	1296.3	1205.34	90.9629	1114.38	-0.407513	0.131628	0.984512	3.25198e-11	-0.577	0.0243216	-0.274855	0.321477	-0.967309	4.00917e-09	0.635162	0.0109514	-0.097051	0.730785
Adamts3	blue	-0.861458	0.495254	-0.300055	-0.198217	624.828	584.924	39.9037	545.021	-0.269017	0.332274	0.8458	7.09877e-05	-0.576783	0.0243876	-0.300055	0.277224	-0.861458	3.68223e-05	0.495254	0.0604993	-0.198217	0.478841
Orai1	blue	0.970418	-0.636385	0.260554	-0.00785439	1325.71	1235.14	90.5713	1144.57	0.41046	0.128588	-0.987056	1.01945e-11	0.576595	0.0244449	0.260554	0.348286	0.970418	2.10975e-09	-0.636385	0.0107514	-0.00785439	0.977837
2210021J22Rik	blue	0.972188	-0.636284	0.260112	0.0483625	1340.74	1250.42	90.3211	1160.1	0.403989	0.135325	-0.980218	1.57949e-10	0.576229	0.0245571	0.260112	0.349135	0.972188	1.41878e-09	-0.636284	0.0107678	0.0483625	0.864101
Il16	blue	0.966465	-0.619401	0.284563	0.154707	1268.67	1184.96	83.7054	1101.26	0.396196	0.143751	-0.972165	1.42633e-09	0.575969	0.024637	0.284563	0.303975	0.966465	4.72153e-09	-0.619401	0.013797	0.154707	0.581955
Zbtb49	blue	0.858798	-0.451963	0.308119	-0.0216465	640.896	603.844	37.0514	566.793	0.252228	0.364452	-0.828039	0.000137809	0.575811	0.0246855	0.308119	0.263878	0.858798	4.13892e-05	-0.451963	0.0907714	-0.0216465	0.938965
Hunk	blue	0.964886	-0.631086	0.26253	-0.01188	1284.58	1197.24	87.3347	1109.91	0.400131	0.139453	-0.975782	5.82204e-10	0.57565	0.0247351	0.26253	0.344511	0.964886	6.34398e-09	-0.631086	0.011639	-0.01188	0.966483
Zfp709	blue	0.910235	-0.539971	0.293847	0.0442367	889.845	836.826	53.0189	783.807	0.332734	0.225596	-0.908253	2.84075e-06	0.575519	0.0247756	0.293847	0.287769	0.910235	2.47698e-06	-0.539971	0.0377303	0.0442367	0.875608
Lonrf3	blue	0.969702	-0.619758	0.26851	0.0656937	1295.68	1212.37	83.315	1129.05	0.401262	0.138234	-0.976651	4.60076e-10	0.575389	0.0248159	0.26851	0.333222	0.969702	2.45995e-09	-0.619758	0.0137269	0.0656937	0.816066
Arhgef25	blue	0.976715	-0.625677	0.276626	0.0814336	1346.8	1260.19	86.6128	1173.58	0.399864	0.139742	-0.974735	7.64614e-10	0.57487	0.0249765	0.276626	0.318241	0.976715	4.51983e-10	-0.625677	0.0126027	0.0814336	0.772958
4930565O14	blue	0.730163	-0.281006	0.354398	0.110849	288.026	259.017	29.009	230.008	0.104664	0.710477	-0.679293	0.00534848	0.57463	0.0250514	0.354398	0.194955	0.730163	0.00199619	-0.281006	0.310321	0.110849	0.694109
Cln8	blue	0.96225	-0.641696	0.247349	0.0259041	1284.88	1192.96	91.9224	1101.03	0.410528	0.128519	-0.984812	2.86611e-11	0.574284	0.0251591	0.247349	0.374113	0.96225	1.00912e-08	-0.641696	0.00991563	0.0259041	0.926987
Arrb1	blue	0.976335	-0.632644	0.262857	0.0906041	1358.3	1269.22	89.0805	1180.14	0.407626	0.13151	-0.981754	9.37482e-11	0.574128	0.0252081	0.262857	0.343888	0.976335	5.01609e-10	-0.632644	0.0113724	0.0906041	0.748114
Ccdc134	blue	0.678902	-0.199038	0.490095	0.240922	306.008	201.245	104.762	96.4833	-0.00123138	0.996525	-0.57263	0.02568	0.573861	0.0252916	0.490095	0.0636551	0.678902	0.00538534	-0.199038	0.476985	0.240922	0.387048
Zfp607	blue	0.929022	-0.549086	0.329138	0.18998	995.911	932.527	63.3838	869.143	0.331391	0.22759	-0.905167	3.4955e-06	0.573776	0.0253181	0.329138	0.230957	0.929022	5.63781e-07	-0.549086	0.0340123	0.18998	0.497661
Pars2	blue	0.92133	-0.590435	0.240087	-0.0410768	1000.02	933.208	66.8116	866.396	0.366164	0.179498	-0.939763	1.99218e-07	0.573599	0.0253739	0.240087	0.388745	0.92133	1.07978e-06	-0.590435	0.0204857	-0.0410768	0.884436
Enox1	blue	-0.62564	0.114464	-0.429972	0.0569453	152.904	118.092	34.812	83.2799	0.036509	0.89722	0.536211	0.0393493	-0.57272	0.0256513	-0.429972	0.109671	-0.62564	0.0126093	0.114464	0.684598	0.0569453	0.840247
Tmem175	blue	0.974656	-0.636914	0.269537	0.0478314	1347.44	1255.72	91.7242	1163.99	0.409108	0.129977	-0.981684	9.60926e-11	0.572576	0.0256971	0.269537	0.331305	0.974656	7.80111e-10	-0.636914	0.0106659	0.0478314	0.865581
Mxra8	blue	0.951441	-0.572246	0.307856	0.153925	1119.3	1053.16	66.1422	987.018	0.356959	0.19152	-0.928665	5.81967e-07	0.571706	0.0259743	0.307856	0.264308	0.951441	5.05042e-08	-0.572246	0.0258019	0.153925	0.58389
Mex3b	blue	0.848885	-0.439937	0.389425	0.122078	620.364	560.903	59.4612	501.442	0.228447	0.412827	-0.799944	0.000342847	0.571496	0.0260415	0.389425	0.151353	0.848885	6.27384e-05	-0.439937	0.100797	0.122078	0.664714
Fam53b	blue	0.96721	-0.613754	0.282774	0.126821	1270.73	1189.18	81.5493	1107.63	0.389279	0.15152	-0.960522	1.34413e-08	0.571243	0.0261227	0.282774	0.307157	0.96721	4.08749e-09	-0.613754	0.0149452	0.126821	0.652428
Rarg	blue	0.972746	-0.635952	0.269228	0.0501756	1342.58	1251.62	90.9564	1160.66	0.41239	0.126625	-0.983632	4.64813e-11	0.571242	0.0261231	0.269228	0.33188	0.972746	1.24519e-09	-0.635952	0.0108219	0.0501756	0.859052
Zfp54	blue	0.909916	-0.566631	0.277901	0.0510466	903.206	845.475	57.731	787.744	0.352866	0.197028	-0.923974	8.70312e-07	0.571108	0.0261663	0.277901	0.315925	0.909916	2.53259e-06	-0.566631	0.0276373	0.0510466	0.856629
Xrcc2	blue	0.904058	-0.544915	0.315431	0.178647	839.758	783.667	56.0907	727.576	0.314158	0.254144	-0.885197	1.15185e-05	0.571039	0.0261883	0.315431	0.25212	0.904058	3.75962e-06	-0.544915	0.0356778	0.178647	0.524107
1810062G17Rik	blue	0.962593	-0.620445	0.264979	0.110873	1253.38	1171.67	81.7091	1089.96	0.398967	0.140716	-0.968751	3.0008e-09	0.569784	0.026595	0.264979	0.339862	0.962593	9.51726e-09	-0.620445	0.0135925	0.110873	0.694045
Nostrin	blue	-0.973456	0.647352	-0.257093	-0.00519899	1360.55	1264.67	95.8757	1168.8	-0.419344	0.119719	0.988865	3.84769e-12	-0.569522	0.0266805	-0.257093	0.354957	-0.973456	1.0506e-09	0.647352	0.00908243	-0.00519899	0.985329
Meg3	blue	0.714476	-0.239486	0.422589	0.297259	240.709	206.903	33.8063	173.097	0.0801333	0.776497	-0.649532	0.00877631	0.569398	0.0267208	0.422589	0.116586	0.714476	0.00276382	-0.239486	0.389971	0.297259	0.281945
9430024F10Rik	blue	0.939477	-0.584997	0.297076	0.290077	1062.48	994.622	67.858	926.764	0.375489	0.167833	-0.944823	1.1403e-07	0.569333	0.0267421	0.297076	0.282255	0.939477	2.05304e-07	-0.584997	0.021978	0.290077	0.294286
Pard6a	blue	0.956408	-0.612497	0.291739	0.162271	1208.22	1125.91	82.3052	1043.61	0.383849	0.157811	-0.953076	4.05856e-08	0.569227	0.0267769	0.291739	0.291403	0.956408	2.53501e-08	-0.612497	0.0152103	0.162271	0.563398
Vps37d	blue	0.958308	-0.614225	0.282235	0.175669	1210.82	1130.48	80.3489	1050.13	0.391389	0.149121	-0.960508	1.34712e-08	0.569119	0.0268121	0.282235	0.308119	0.958308	1.9061e-08	-0.614225	0.0148466	0.175669	0.531158
Lass4	blue	0.945543	-0.57467	0.28502	0.13797	1102.19	1037.25	64.942	972.306	0.365487	0.180365	-0.934507	3.3878e-07	0.569019	0.0268449	0.28502	0.303164	0.945543	1.0488e-07	-0.57467	0.0250387	0.13797	0.623883
Klf3	blue	0.961684	-0.631498	0.274687	0.025253	1257.76	1169.72	88.0332	1081.69	0.402451	0.136961	-0.971467	1.67266e-09	0.569015	0.0268462	0.274687	0.321784	0.961684	1.11e-08	-0.631498	0.011568	0.025253	0.928818
Adcy3	blue	0.651851	-0.13869	0.462611	0.232805	192.827	152.48	40.3472	112.133	-0.0288884	0.9186	-0.540116	0.037669	0.569004	0.0268499	0.462611	0.0825008	0.651851	0.00845944	-0.13869	0.622055	0.232805	0.403721
6330549D23Rik	blue	0.873954	-0.491666	0.338007	0.0593813	695.963	649.824	46.1389	603.685	0.266496	0.336999	-0.835049	0.000107044	0.568553	0.0269983	0.338007	0.217876	0.873954	2.0555e-05	-0.491666	0.0626819	0.0593813	0.8335
Senp8	blue	0.957512	-0.639706	0.257435	0.0722166	1252.96	1162.82	90.1412	1072.68	0.410688	0.128355	-0.977655	3.46504e-10	0.566967	0.0275247	0.257435	0.354295	0.957512	2.15142e-08	-0.639706	0.0102226	0.0722166	0.798134
Gcom1	blue	0.949793	-0.591336	0.295251	0.164068	1132.43	1061.79	70.6435	991.148	0.382217	0.159735	-0.949011	6.89561e-08	0.566794	0.0275827	0.295251	0.285363	0.949793	6.2485e-08	-0.591336	0.020246	0.164068	0.559027
Efcab4a	blue	0.951587	-0.586774	0.308083	0.171414	1139.6	1067.23	72.3714	994.855	0.374521	0.16902	-0.940951	1.7553e-07	0.56643	0.027705	0.308083	0.263936	0.951587	4.95418e-08	-0.586774	0.0214814	0.171414	0.541308
Cnrip1	blue	0.963929	-0.606114	0.291535	0.188306	1232.91	1154.75	78.1576	1076.59	0.389448	0.151326	-0.955597	2.85194e-08	0.566149	0.0277995	0.291535	0.291755	0.963929	7.53816e-09	-0.606114	0.0166141	0.188306	0.501529
Mark1	blue	0.933731	-0.587266	0.255142	-0.0211009	1042	976.806	65.1942	911.612	0.372979	0.170922	-0.939112	2.13287e-07	0.566133	0.0278048	0.255142	0.358748	0.933731	3.65027e-07	-0.587266	0.0213456	-0.0211009	0.9405
Amot	blue	0.968538	-0.640878	0.26189	0.122795	1315	1222.76	92.2374	1130.52	0.416116	0.122891	-0.981656	9.70534e-11	0.56554	0.0280051	0.26189	0.345732	0.968538	3.13435e-09	-0.640878	0.010041	0.122795	0.66285
Rnf32	blue	0.677159	-0.217384	0.462801	0.228449	222.638	169.274	53.3639	115.91	0.0167647	0.952713	-0.582165	0.0227872	0.565401	0.0280524	0.462801	0.0823588	0.677159	0.00555169	-0.217384	0.436415	0.228449	0.412823
Tube1	blue	0.944995	-0.603665	0.256484	0.124138	1128.35	1055.61	72.7388	982.874	0.385708	0.155638	-0.950029	6.06372e-08	0.564321	0.0284204	0.256484	0.356137	0.944995	1.11782e-07	-0.603665	0.0171783	0.124138	0.659369
Wls	blue	0.940302	-0.554879	0.303879	0.133814	1048.67	988.992	59.6788	929.313	0.348182	0.203456	-0.912402	2.12442e-06	0.56422	0.0284549	0.303879	0.270847	0.940302	1.88154e-07	-0.554879	0.0317967	0.133814	0.63447
Mtmr4	blue	0.945828	-0.637496	0.244645	0.0146651	1177.98	1090.45	87.5239	1002.93	0.405663	0.133561	-0.969818	2.40015e-09	0.564156	0.0284771	0.244645	0.379526	0.945828	1.0143e-07	-0.637496	0.0105723	0.0146651	0.95863
Zfp764	blue	0.947939	-0.624913	0.235982	-0.0271552	1185.87	1104.59	81.2849	1023.3	0.405412	0.133823	-0.969403	2.62018e-09	0.563991	0.0285336	0.235982	0.397151	0.947939	7.87398e-08	-0.624913	0.0127436	-0.0271552	0.923469
Ccnf	blue	0.966946	-0.648131	0.247843	0.0404636	1315.11	1220.28	94.8325	1125.45	0.425112	0.11419	-0.989102	3.34845e-12	0.563989	0.0285342	0.247843	0.373128	0.966946	4.30355e-09	-0.648131	0.00897205	0.0404636	0.886151
Igsf3	blue	0.922976	-0.550837	0.326649	0.136617	958.173	894.855	63.3178	831.538	0.333012	0.225184	-0.896615	5.99814e-06	0.563603	0.0286671	0.326649	0.234715	0.922976	9.44969e-07	-0.550837	0.0333307	0.136617	0.627321
Nphp3	blue	0.963661	-0.635899	0.261777	0.0375503	1261.11	1172.96	88.1454	1084.82	0.403435	0.135913	-0.966683	4.52839e-09	0.563248	0.0287899	0.261777	0.345947	0.963661	7.90367e-09	-0.635899	0.0108306	0.0375503	0.894304
Hoxb4	blue	0.971271	-0.635593	0.255396	0.0956293	1327.54	1238.75	88.7918	1149.96	0.417825	0.121204	-0.980928	1.2477e-10	0.563103	0.0288401	0.255396	0.358253	0.971271	1.74785e-09	-0.635593	0.0108806	0.0956293	0.734596
Wdr81	blue	0.972196	-0.648186	0.253836	0.0807568	1357.56	1261.79	95.7687	1166.03	0.421134	0.117983	-0.984085	3.87711e-11	0.562951	0.0288926	0.253836	0.361299	0.972196	1.41604e-09	-0.648186	0.00896433	0.0807568	0.774799
LOC100044171	blue	-0.62597	0.162597	-0.445891	0.138619	143.827	109.927	33.8997	76.0275	0.028516	0.919646	0.534425	0.040136	-0.562941	0.0288961	-0.445891	0.0957408	-0.62597	0.0125488	0.162597	0.562604	0.138619	0.622236
Fan1	blue	0.792545	-0.449931	0.300555	0.157084	404.291	376.662	27.6292	349.033	0.241901	0.385062	-0.804759	0.000296297	0.562858	0.0289251	0.300555	0.276386	0.792545	0.000425885	-0.449931	0.0924138	0.157084	0.576098
Hdac9	blue	0.902333	-0.495979	0.357746	0.200891	831.092	775.309	55.7827	719.527	0.295767	0.284483	-0.857923	4.29896e-05	0.562156	0.0291693	0.357746	0.190472	0.902333	4.20309e-06	-0.495979	0.0600655	0.200891	0.472806
Tradd	blue	0.967177	-0.655539	0.235311	0.0230713	1336.16	1238.12	98.0458	1140.07	0.425565	0.113763	-0.987436	8.40471e-12	0.561871	0.0292691	0.235311	0.398535	0.967177	4.11408e-09	-0.655539	0.00797426	0.0230713	0.934955
Nkiras2	blue	0.963543	-0.638196	0.264506	0.0726421	1278.85	1188.94	89.9171	1099.02	0.409248	0.129832	-0.970901	1.8978e-09	0.561653	0.0293458	0.264506	0.340756	0.963543	8.07014e-09	-0.638196	0.0104606	0.0726421	0.796968
Mycn	blue	0.959485	-0.645554	0.251366	0.0963987	1253.68	1161.4	92.2761	1069.13	0.419223	0.119836	-0.980874	1.27045e-10	0.561652	0.0293461	0.251366	0.366149	0.959485	1.58697e-08	-0.645554	0.00934111	0.0963987	0.732533
Rrp36	blue	0.94593	-0.647415	0.224784	0.0105165	1198.58	1106.79	91.7941	1014.99	0.41808	0.120954	-0.979389	2.05829e-10	0.561309	0.0294664	0.224784	0.420562	0.94593	1.00219e-07	-0.647415	0.00907344	0.0105165	0.970328
Arl16	blue	0.966076	-0.649174	0.250532	0.11818	1312.38	1216.88	95.5057	1121.37	0.42532	0.113993	-0.986005	1.68897e-11	0.560685	0.029687	0.250532	0.367794	0.966076	5.08503e-09	-0.649174	0.008826	0.11818	0.674869
Klhl26	blue	0.939594	-0.625583	0.244154	-0.0139142	1116.38	1037.15	79.2379	957.908	0.394274	0.145882	-0.954412	3.37458e-08	0.560138	0.029881	0.244154	0.380513	0.939594	2.02799e-07	-0.625583	0.0126198	-0.0139142	0.960747
Slc43a1	blue	-0.954797	0.63144	-0.255883	-0.0765342	1211.17	1126.03	85.1427	1040.88	-0.417913	0.121117	0.977307	3.82798e-10	-0.559394	0.0301466	-0.255883	0.357306	-0.954797	3.19648e-08	0.63144	0.0115779	-0.0765342	0.786316
Dem1	blue	0.965421	-0.647747	0.238889	0.0333946	1311.37	1217.85	93.5292	1124.32	0.429328	0.110262	-0.988298	5.30871e-12	0.558969	0.0302991	0.238889	0.391189	0.965421	5.74856e-09	-0.647747	0.00902632	0.0333946	0.90595
Gpcpd1	blue	-0.913001	0.57382	-0.264551	0.0203311	907.497	849.683	57.8137	791.87	-0.357778	0.190429	0.916607	1.55912e-06	-0.558829	0.0303495	-0.264551	0.34067	-0.913001	2.03478e-06	0.57382	0.0253045	0.0203311	0.942668
Mtnr1a	blue	0.798266	-0.420077	0.352851	-0.0435173	418.046	383.071	34.9747	348.097	0.214367	0.442964	-0.773184	0.000723188	0.558818	0.0303536	0.352851	0.197049	0.798266	0.000360405	-0.420077	0.119006	-0.0435173	0.877616
Katnal1	blue	0.957826	-0.654912	0.232501	0.0610953	1267.23	1171.42	95.8074	1075.61	0.42169	0.117448	-0.980081	1.65118e-10	0.558391	0.0305074	0.232501	0.404355	0.957826	2.05172e-08	-0.654912	0.00805529	0.0610953	0.828759
Krtcap3	blue	0.953516	-0.640179	0.242813	0.142143	1216.86	1128.52	88.3345	1040.19	0.414967	0.124034	-0.973316	1.08689e-09	0.558349	0.0305227	0.242813	0.383218	0.953516	3.82167e-08	-0.640179	0.010149	0.142143	0.613323
Rap2a	blue	0.96619	-0.65153	0.23946	0.0239166	1316.56	1221.32	95.2457	1126.07	0.429609	0.110004	-0.987731	7.20809e-12	0.558122	0.0306048	0.23946	0.390023	0.96619	4.97642e-09	-0.65153	0.0085028	0.0239166	0.932576
Dagla	blue	0.968871	-0.654352	0.248064	0.00896192	1331.37	1233.89	97.4778	1136.41	0.430107	0.109547	-0.987554	7.90907e-12	0.557447	0.03085	0.248064	0.372687	0.968871	2.92751e-09	-0.654352	0.00812798	0.00896192	0.974713
Lrrc45	blue	0.947127	-0.62913	0.226946	0.0410435	1182.12	1099.28	82.8357	1016.44	0.411602	0.127424	-0.968957	2.876e-09	0.557355	0.0308836	0.226946	0.415988	0.947127	8.69009e-08	-0.62913	0.0119807	0.0410435	0.884529
Fam198b	blue	0.818998	-0.38308	0.362484	0.109024	462.752	431.91	30.8412	401.069	0.202543	0.469098	-0.759852	0.00101229	0.557309	0.0309005	0.362484	0.184243	0.818998	0.000187877	-0.38308	0.158716	0.109024	0.698924
Cela1	blue	-0.469986	-0.0738218	-0.523082	0.156933	96.4843	42.4944	53.9899	-11.4956	0.235416	0.398318	0.321041	0.24332	-0.556457	0.0312125	-0.523082	0.0454097	-0.469986	0.077097	-0.0738218	0.793736	0.156933	0.576469
Rnf34	blue	0.971088	-0.654945	0.235829	0.0760709	1360.32	1262.55	97.77	1164.78	0.434068	0.10596	-0.990228	1.65212e-12	0.55616	0.0313218	0.235829	0.397467	0.971088	1.82064e-09	-0.654945	0.0080509	0.0760709	0.787582
Foxq1	blue	-0.821006	0.468944	-0.292837	0.105097	486.13	454.047	32.0823	421.965	-0.257153	0.354841	0.813285	0.000226582	-0.556132	0.0313322	-0.292837	0.289506	-0.821006	0.000175639	0.468944	0.0778448	0.105097	0.709327
Dcp1b	blue	0.960121	-0.636589	0.244246	0.0661478	1244.64	1158.77	85.8775	1072.89	0.407943	0.131182	-0.963635	7.94107e-09	0.555692	0.0314947	0.244246	0.380329	0.960121	1.43403e-08	-0.636589	0.0107183	0.0661478	0.814815
Olfr1109	blue	-0.756762	0.351972	-0.342091	-0.0803191	301.689	277.266	24.4228	252.843	-0.160078	0.568753	0.715404	0.00271271	-0.555326	0.0316305	-0.342091	0.212013	-0.756762	0.00109109	0.351972	0.198245	-0.0803191	0.775991
Rnf186	blue	-0.914362	0.616737	-0.244929	0.0351702	969.978	896.24	73.7372	822.503	-0.389437	0.151339	0.944701	1.15642e-07	-0.555264	0.0316535	-0.244929	0.378955	-0.914362	1.84274e-06	0.616737	0.0143299	0.0351702	0.900972
Plcl2	blue	-0.944586	0.641868	-0.231962	-0.0132667	1172.2	1084.21	87.9824	996.231	-0.41361	0.125394	0.968694	3.03571e-09	-0.555084	0.0317203	-0.231962	0.405475	-0.944586	1.17177e-07	0.641868	0.00988955	-0.0132667	0.962573
B3gntl1	blue	0.933879	-0.601245	0.27214	0.127969	1029.4	959.529	69.8738	889.655	0.379097	0.163458	-0.93299	3.91684e-07	0.553893	0.0321661	0.27214	0.326474	0.933879	3.59891e-07	-0.601245	0.0177502	0.127969	0.649469
Pkdcc	blue	-0.940659	0.641749	-0.242609	-0.0656728	1137.46	1049.59	87.8679	961.723	-0.404449	0.134839	0.957925	2.02093e-08	-0.553476	0.0323231	-0.242609	0.38363	-0.940659	1.81117e-07	0.641749	0.00990765	-0.0656728	0.816124
Hras1	blue	0.941348	-0.609129	0.277139	0.138366	1110.82	1033.71	77.1099	956.602	0.38454	0.157002	-0.93795	2.40495e-07	0.55341	0.0323479	0.277139	0.317307	0.941348	1.68169e-07	-0.609129	0.0159391	0.138366	0.622877
Mrm1	blue	0.97027	-0.665671	0.230006	0.0308778	1369.11	1265.7	103.411	1162.29	0.441509	0.0994437	-0.994698	3.13635e-14	0.553189	0.0324315	0.230006	0.409558	0.97027	2.1784e-09	-0.665671	0.00675298	0.0308778	0.913013
Zfp810	blue	0.928357	-0.601059	0.24754	0.0127989	1027.78	959.745	68.036	891.709	0.385643	0.155714	-0.938331	2.31286e-07	0.552687	0.0326218	0.24754	0.373731	0.928357	5.98028e-07	-0.601059	0.0177948	0.0127989	0.963892
Tmem186	blue	0.957427	-0.6565	0.23421	0.109004	1269.07	1172.36	96.7064	1075.66	0.433721	0.106271	-0.986391	1.40932e-11	0.55267	0.0326284	0.23421	0.40081	0.957427	2.17901e-08	-0.6565	0.00785158	0.109004	0.698979
Ramp2	blue	0.95206	-0.599736	0.268447	0.151625	1161.09	1089.81	71.2789	1018.53	0.39076	0.149833	-0.943204	1.37066e-07	0.552444	0.0327146	0.268447	0.333339	0.95206	4.65338e-08	-0.599736	0.0181141	0.151625	0.589588
Dyrk1b	blue	0.936309	-0.59453	0.290005	0.146152	1076.61	1003.11	73.506	929.603	0.372324	0.171735	-0.924658	8.22024e-07	0.552334	0.0327563	0.290005	0.294412	0.936309	2.83841e-07	-0.59453	0.0194139	0.146152	0.603242
Spon2	blue	0.85687	-0.504293	0.275271	0.0454629	643.02	602.605	40.4151	562.19	0.301672	0.274516	-0.853896	5.10317e-05	0.552224	0.0327983	0.275271	0.320715	0.85687	4.49833e-05	-0.504293	0.0552482	0.0454629	0.872185
2410075B13Rik	blue	0.963056	-0.6591	0.229652	0.0403396	1308.57	1210.84	97.7322	1113.11	0.431845	0.107963	-0.984032	3.96212e-11	0.552187	0.0328125	0.229652	0.410299	0.963056	8.78621e-09	-0.6591	0.0075268	0.0403396	0.886498
Unc119	blue	0.936612	-0.610706	0.244123	-0.0159638	1085.49	1011.58	73.9038	937.679	0.400289	0.139283	-0.9519	4.75344e-08	0.551611	0.033033	0.244123	0.380576	0.936612	2.75373e-07	-0.610706	0.0155946	-0.0159638	0.95497
Crb2	blue	0.832133	-0.457346	0.328697	0.104352	502.224	468.591	33.6329	434.958	0.253351	0.362248	-0.804457	0.000299058	0.551105	0.0332273	0.328697	0.23162	0.832133	0.00011907	-0.457346	0.0865205	0.104352	0.711305
Bcdin3d	blue	0.961496	-0.661901	0.226402	0.0402402	1311.82	1211.56	100.263	1111.3	0.440968	0.099908	-0.991734	5.58561e-13	0.550766	0.0333582	0.226402	0.417138	0.961496	1.14537e-08	-0.661901	0.00718892	0.0402402	0.886776
4933431K14Rik	blue	0.966637	-0.659268	0.230767	0.104121	1337.02	1238.05	98.9672	1139.08	0.439553	0.101129	-0.989436	2.73761e-12	0.549882	0.0337012	0.230767	0.407968	0.966637	4.56885e-09	-0.659268	0.00750624	0.104121	0.711917
Zfp846	blue	0.943927	-0.611385	0.287475	0.19739	1123.6	1044.54	79.0625	965.473	0.395305	0.144736	-0.944453	1.18983e-07	0.549148	0.0339881	0.287475	0.298835	0.943927	1.26334e-07	-0.611385	0.015448	0.19739	0.480716
Gatsl2	blue	0.952714	-0.615455	0.273341	0.0765954	1179.99	1100.62	79.3663	1021.25	0.393994	0.146194	-0.942216	1.52954e-07	0.548222	0.0343527	0.273341	0.324257	0.952714	4.26236e-08	-0.615455	0.0145917	0.0765954	0.786149
9330159N05Rik	blue	0.902608	-0.544182	0.262838	0.100189	847.63	798.18	49.45	748.73	0.340321	0.214541	-0.888131	9.80631e-06	0.547809	0.0345159	0.262838	0.343923	0.902608	4.12968e-06	-0.544182	0.0359769	0.100189	0.722393
1810031K17Rik	blue	0.950508	-0.633007	0.250689	0.0557486	1200.07	1114.85	85.2238	1029.62	0.411	0.128037	-0.958364	1.88966e-08	0.547365	0.0346925	0.250689	0.367485	0.950508	5.70251e-08	-0.633007	0.0113109	0.0557486	0.843566
Gpr172b	blue	0.955843	-0.668819	0.216113	0.00281796	1284.17	1181.07	103.101	1077.97	0.442667	0.0984553	-0.989717	2.29901e-12	0.547049	0.0348183	0.216113	0.439169	0.955843	2.7524e-08	-0.668819	0.00640523	0.00281796	0.992048
Bbs10	blue	0.948194	-0.6469	0.220533	0.0500325	1211.57	1120.56	91.0111	1029.55	0.4331	0.106829	-0.979998	1.69643e-10	0.546898	0.0348787	0.220533	0.429633	0.948194	7.63136e-08	-0.6469	0.00914692	0.0500325	0.85945
Zfp78	blue	0.938613	-0.633468	0.249644	0.11256	1109.08	1025.46	83.6162	941.845	0.418566	0.120478	-0.965227	5.95853e-09	0.546662	0.0349733	0.249644	0.369552	0.938613	2.24635e-07	-0.633468	0.0112332	0.11256	0.6896
AI480653	blue	0.952884	-0.610892	0.272704	0.129407	1173.02	1096.12	76.9037	1019.21	0.395503	0.144517	-0.941977	1.57022e-07	0.546474	0.0350483	0.272704	0.325432	0.952884	4.16594e-08	-0.610892	0.0155543	0.129407	0.645767
Pdgfrb	blue	0.970331	-0.666932	0.228615	0.0372054	1365.51	1262.16	103.354	1158.8	0.444701	0.096737	-0.991121	8.88214e-13	0.54642	0.03507	0.228615	0.412474	0.970331	2.14961e-09	-0.666932	0.00661201	0.0372054	0.89527
Rps6ka5	blue	-0.882526	0.56792	-0.242454	0.0121613	765.485	713.026	52.4583	660.568	-0.351767	0.198524	0.898034	5.50233e-06	-0.546267	0.0351316	-0.242454	0.383944	-0.882526	1.32871e-05	0.56792	0.0272075	0.0121613	0.965689
Treh	blue	0.722338	-0.407904	0.270287	-0.223371	255.508	234.972	20.536	214.436	0.179737	0.521536	-0.725769	0.00219138	0.546032	0.0352261	0.270287	0.329908	0.722338	0.00235413	-0.407904	0.131221	-0.223371	0.423566
Snx30	blue	0.95406	-0.648799	0.237834	0.0356485	1244.98	1152.68	92.3041	1060.37	0.424496	0.114771	-0.96992	2.34843e-09	0.545424	0.0354715	0.237834	0.393347	0.95406	3.54443e-08	-0.648799	0.0088782	0.0356485	0.899631
Foxr1	blue	0.489418	0.020819	0.518499	0.0502094	100.714	45.4719	55.2424	-9.77046	-0.180151	0.52056	-0.364798	0.18125	0.544949	0.0356641	0.518499	0.0476798	0.489418	0.0640777	0.020819	0.941294	0.0502094	0.858958
Pgd	blue	0.932983	-0.636415	0.226162	0.0142651	1077.43	996.251	81.176	915.075	0.408339	0.130771	-0.952672	4.28701e-08	0.544333	0.0359151	0.226162	0.417645	0.932983	3.91943e-07	-0.636415	0.0107465	0.0142651	0.959758
Enho	blue	0.48625	-0.010287	0.427269	0.189078	79.1584	46.7751	32.3834	14.3917	-0.127618	0.650373	-0.416567	0.122444	0.544185	0.0359755	0.427269	0.112169	0.48625	0.0660825	-0.010287	0.970975	0.189078	0.499742
A430108E01Rik	blue	0.614104	-0.135061	0.482275	0.141649	167.343	107.831	59.5116	48.3196	-0.0278219	0.921596	-0.516245	0.0488263	0.544067	0.036024	0.482275	0.0686625	0.614104	0.0148718	-0.135061	0.631286	0.141649	0.614568
Wdyhv1	blue	0.959135	-0.65999	0.231347	0.0870215	1289.98	1191.07	98.9045	1092.17	0.434016	0.106006	-0.977552	3.56941e-10	0.543536	0.0362417	0.231347	0.406757	0.959135	1.6766e-08	-0.65999	0.00741814	0.0870215	0.757794
Gm5544	blue	0.878299	-0.533427	0.301274	0.0944719	752.388	700.054	52.3333	647.721	0.318105	0.247901	-0.861297	3.70867e-05	0.543192	0.0363835	0.301274	0.275182	0.878299	1.65437e-05	-0.533427	0.040581	0.0944719	0.737704
Bola1	blue	0.95956	-0.672688	0.224499	0.0412943	1313.79	1207.9	105.887	1102.01	0.442891	0.098265	-0.985531	2.09453e-11	0.54264	0.0366118	0.224499	0.421168	0.95956	1.56819e-08	-0.672688	0.00599734	0.0412943	0.883828
[truncated: 5,127 more rows]

## Sheet: brown
GO	Term	Count	%	PValue	Genes	List Total	Pop Hits	Pop Total	Fold Enrichment	Bonferroni	Benjamini	FDR		KEGG	Term	Count	%	PValue	Genes	List Total	Pop Hits	Pop Total	Fold Enrichment	Bonferroni	Benjamini	FDR
[truncated: 376 more rows]

[truncated: 2 more sheets: blue, turquoise]
